# Supplementary material
Source: PubMed Central journal article supplement (PMC4910713)
Supplement: NIHMS656221-supplement-Table_S1.pdf [file NIHMS656221-supplement-Table_S1.pdf]

## WT water versus WT CMC - Feces

| Phyla level                       | P value       | Mean water-treated | Mean CMC-treated | Difference     | SE of difference |
|-----------------------------------|---------------|--------------------|------------------|----------------|------------------|
| Root;k_Bacteria;p_Actinobacteria  | <b>0.0011</b> | <b>0.0061</b>      | <b>0.0008</b>    | <b>0.0054</b>  | <b>0.0011</b>    |
| Root;k_Bacteria;p_Bacteroidetes   | <b>0.0201</b> | <b>0.4096</b>      | <b>0.5277</b>    | <b>-0.1181</b> | <b>0.0408</b>    |
| Root;k_Bacteria;p_Cyanobacteria   | 0.1675        | 0.0011             | 0.0026           | -0.0015        | 0.0010           |
| Root;k_Bacteria;p_Deferribacteres | 0.1592        | 0.0001             | 0.0000           | 0.0001         | 0.0001           |
| Root;k_Bacteria;p_Firmicutes      | <b>0.0203</b> | <b>0.4978</b>      | <b>0.3796</b>    | <b>0.1182</b>  | <b>0.0409</b>    |
| Root;k_Bacteria;p_Planctomycetes  |               |                    |                  |                |                  |
| Root;k_Bacteria;p_Proteobacteria  | 0.6174        | 0.0790             | 0.0848           | -0.0058        | 0.0112           |
| Root;k_Bacteria;p_TM7             | <b>0.0036</b> | <b>0.0003</b>      | <b>0.0000</b>    | <b>0.0002</b>  | <b>0.0001</b>    |
| Root;k_Bacteria;p_Tenericutes     | 0.6116        | 0.0059             | 0.0045           | 0.0015         | 0.0028           |
| Root;k_Bacteria;p_Verrucomicrobia |               |                    |                  |                |                  |

| Class level                                              | P value       | Mean water-treated | Mean CMC-treated | Difference     | SE of difference |
|----------------------------------------------------------|---------------|--------------------|------------------|----------------|------------------|
| Root;k_Bacteria;p_Actinobacteria;c_Actinobacteria        | <b>0.0011</b> | <b>0.0061</b>      | <b>0.0008</b>    | <b>0.0054</b>  | <b>0.0011</b>    |
| Root;k_Bacteria;p_Actinobacteria;c_Thermoleophilia       |               |                    |                  |                |                  |
| Root;k_Bacteria;p_Bacteroidetes;c_Bacteroidia            | <b>0.0201</b> | <b>0.4096</b>      | <b>0.5277</b>    | <b>-0.1181</b> | <b>0.0408</b>    |
| Root;k_Bacteria;p_Bacteroidetes;c_Flavobacteriia         |               |                    |                  |                |                  |
| Root;k_Bacteria;p_Bacteroidetes;c_Sphingobacteriia       |               |                    |                  |                |                  |
| Root;k_Bacteria;p_Cyanobacteria;c_4COd-2                 | 0.1541        | 0.0008             | 0.0025           | -0.0016        | 0.0010           |
| Root;k_Bacteria;p_Cyanobacteria;c_Chloroplast            | 0.3049        | 0.0002             | 0.0001           | 0.0001         | 0.0001           |
| Root;k_Bacteria;p_Deferribacteres;c_Deferribacteres      | 0.1592        | 0.0001             | 0.0000           | 0.0001         | 0.0001           |
| Root;k_Bacteria;p_Firmicutes;c_Bacilli                   | 0.2075        | 0.0987             | 0.1465           | -0.0478        | 0.0349           |
| Root;k_Bacteria;p_Firmicutes;c_Clostridia                | <b>0.0108</b> | <b>0.3572</b>      | <b>0.2050</b>    | <b>0.1522</b>  | <b>0.0461</b>    |
| Root;k_Bacteria;p_Firmicutes;c_Erysipelotrichi           | 0.4133        | 0.0419             | 0.0281           | 0.0138         | 0.0160           |
| Root;k_Bacteria;p_Planctomycetes;c_Planctomycetia        |               |                    |                  |                |                  |
| Root;k_Bacteria;p_Proteobacteria;c_Alphaproteobacteria   | 0.0937        | 0.0000             | 0.0002           | -0.0002        | 0.0001           |
| Root;k_Bacteria;p_Proteobacteria;c_Betaproteobacteria    | <b>0.0027</b> | <b>0.0085</b>      | <b>0.0335</b>    | <b>-0.0250</b> | <b>0.0058</b>    |
| Root;k_Bacteria;p_Proteobacteria;c_Deltaproteobacteria   | 0.3526        | 0.0466             | 0.0320           | 0.0146         | 0.0148           |
| Root;k_Bacteria;p_Proteobacteria;c_Epsilonproteobacteria | 0.4198        | 0.0239             | 0.0192           | 0.0047         | 0.0056           |
| Root;k_Bacteria;p_Proteobacteria;c_Gammaproteobacteria   |               |                    |                  |                |                  |
| Root;k_Bacteria;p_TM7;c_TM7-3                            | <b>0.0036</b> | <b>0.0003</b>      | <b>0.0000</b>    | <b>0.0002</b>  | <b>0.0001</b>    |
| Root;k_Bacteria;p_Tenericutes;c_Mollicutes               | 0.6116        | 0.0059             | 0.0045           | 0.0015         | 0.0028           |
| Root;k_Bacteria;p_Verrucomicrobia;c_Verrucomicrobiae     |               |                    |                  |                |                  |

| Order level                                                              | P value       | Mean water-treated | Mean CMC-treated | Difference     | SE of difference |
|--------------------------------------------------------------------------|---------------|--------------------|------------------|----------------|------------------|
| Root;k_Bacteria;p_Actinobacteria;c_Actinobacteria;o_Actinomycetales      |               |                    |                  |                |                  |
| Root;k_Bacteria;p_Actinobacteria;c_Actinobacteria;o_Bifidobacteriales    | <b>0.0011</b> | <b>0.0061</b>      | <b>0.0008</b>    | <b>0.0054</b>  | <b>0.0011</b>    |
| Root;k_Bacteria;p_Actinobacteria;c_Thermoleophilia;o_Solirubrobacterales |               |                    |                  |                |                  |
| Root;k_Bacteria;p_Bacteroidetes;c_Bacteroidia;o_Bacteroidales            | <b>0.0201</b> | <b>0.4096</b>      | <b>0.5277</b>    | <b>-0.1181</b> | <b>0.0408</b>    |
| Root;k_Bacteria;p_Bacteroidetes;c_Flavobacteriia;o_Flavobacteriales      |               |                    |                  |                |                  |
| Root;k_Bacteria;p_Bacteroidetes;c_Sphingobacteriia;o_Sphingobacteriales  |               |                    |                  |                |                  |

|                                                                                |               |               |               |                |               |
|--------------------------------------------------------------------------------|---------------|---------------|---------------|----------------|---------------|
| Root;k_Bacteria;p_Cyanobacteria;c_4C0d-2;o_YS2                                 | 0.1541        | 0.0008        | 0.0025        | -0.0016        | 0.0010        |
| Root;k_Bacteria;p_Cyanobacteria;c_Chloroplast;o_Streptophyta                   | 0.3049        | 0.0002        | 0.0001        | 0.0001         | 0.0001        |
| Root;k_Bacteria;p_Deferribacteres;c_Deferribacteres;o_Deferribacterales        | 0.1592        | 0.0001        | 0.0000        | 0.0001         | 0.0001        |
| Root;k_Bacteria;p_Firmicutes;c_Bacilli;o_                                      |               |               |               |                |               |
| Root;k_Bacteria;p_Firmicutes;c_Bacilli;o_Bacillales                            |               |               |               |                |               |
| <b>Root;k_Bacteria;p_Firmicutes;c_Bacilli;o_Lactobacillales</b>                | <b>0.0444</b> | <b>0.0665</b> | <b>0.1462</b> | <b>-0.0797</b> | <b>0.0335</b> |
| <b>Root;k_Bacteria;p_Firmicutes;c_Bacilli;o_Turicibacterales</b>               | <b>0.0032</b> | <b>0.0322</b> | <b>0.0003</b> | <b>0.0319</b>  | <b>0.0077</b> |
| <b>Root;k_Bacteria;p_Firmicutes;c_Clostridia;o_</b>                            | <b>0.0023</b> | <b>0.0248</b> | <b>0.0077</b> | <b>0.0171</b>  | <b>0.0039</b> |
| <b>Root;k_Bacteria;p_Firmicutes;c_Clostridia;o_Clostridiales</b>               | <b>0.0184</b> | <b>0.3186</b> | <b>0.1926</b> | <b>0.1261</b>  | <b>0.0427</b> |
| <b>Root;k_Bacteria;p_Firmicutes;c_Clostridia;o_Coriobacteriales</b>            | <b>0.0034</b> | <b>0.0137</b> | <b>0.0047</b> | <b>0.0091</b>  | <b>0.0022</b> |
| Root;k_Bacteria;p_Firmicutes;c_Erysipelotrichi;o_Erysipelotrichales            | 0.4133        | 0.0419        | 0.0281        | 0.0138         | 0.0160        |
| Root;k_Bacteria;p_Planctomycetes;c_Planctomycetia;o_Gemmatales                 |               |               |               |                |               |
| Root;k_Bacteria;p_Planctomycetes;c_Planctomycetia;o_Pirellulales               |               |               |               |                |               |
| Root;k_Bacteria;p_Planctomycetes;c_Planctomycetia;o_Planctomycetales           |               |               |               |                |               |
| Root;k_Bacteria;p_Proteobacteria;c_Alphaproteobacteria;o_                      | 0.3466        | 0.0000        | 0.0001        | -0.0001        | 0.0001        |
| Root;k_Bacteria;p_Proteobacteria;c_Alphaproteobacteria;o_RF32                  | 0.5994        | 0.0000        | 0.0001        | 0.0000         | 0.0001        |
| Root;k_Bacteria;p_Proteobacteria;c_Alphaproteobacteria;o_Rhizobiales           |               |               |               |                |               |
| Root;k_Bacteria;p_Proteobacteria;c_Alphaproteobacteria;o_Rhodobacterales       |               |               |               |                |               |
| Root;k_Bacteria;p_Proteobacteria;c_Alphaproteobacteria;o_Rickettsiales         | 0.3466        | 0.0000        | 0.0000        | 0.0000         | 0.0000        |
| Root;k_Bacteria;p_Proteobacteria;c_Alphaproteobacteria;o_Sphingomonadales      |               |               |               |                |               |
| <b>Root;k_Bacteria;p_Proteobacteria;c_Betaproteobacteria;o_Burkholderiales</b> | <b>0.0027</b> | <b>0.0085</b> | <b>0.0335</b> | <b>-0.0250</b> | <b>0.0058</b> |
| Root;k_Bacteria;p_Proteobacteria;c_Betaproteobacteria;o_Methylophilales        |               |               |               |                |               |
| Root;k_Bacteria;p_Proteobacteria;c_Betaproteobacteria;o_Rhodocyclales          |               |               |               |                |               |
| Root;k_Bacteria;p_Proteobacteria;c_Deltaproteobacteria;o_Desulfovibrionales    | 0.3526        | 0.0466        | 0.0320        | 0.0146         | 0.0148        |
| Root;k_Bacteria;p_Proteobacteria;c_Deltaproteobacteria;o_Myxococcales          |               |               |               |                |               |
| Root;k_Bacteria;p_Proteobacteria;c_Deltaproteobacteria;o_Spirobacillales       |               |               |               |                |               |
| Root;k_Bacteria;p_Proteobacteria;c_Epsilonproteobacteria;o_Campylobacterales   | 0.4198        | 0.0239        | 0.0192        | 0.0047         | 0.0056        |
| Root;k_Bacteria;p_Proteobacteria;c_Gammaproteobacteria;o_Aeromonadales         |               |               |               |                |               |
| Root;k_Bacteria;p_Proteobacteria;c_Gammaproteobacteria;o_Enterobacteriales     |               |               |               |                |               |
| Root;k_Bacteria;p_Proteobacteria;c_Gammaproteobacteria;o_Pasteurellales        |               |               |               |                |               |
| Root;k_Bacteria;p_Proteobacteria;c_Gammaproteobacteria;o_Pseudomonadales       |               |               |               |                |               |
| Root;k_Bacteria;p_Proteobacteria;c_Gammaproteobacteria;o_Xanthomonadales       |               |               |               |                |               |
| <b>Root;k_Bacteria;p_TM7;c_TM7-3;o_CW040</b>                                   | <b>0.0036</b> | <b>0.0003</b> | <b>0.0000</b> | <b>0.0002</b>  | <b>0.0001</b> |
| Root;k_Bacteria;p_Tenericutes;c_Mollicutes;o_Acholeplasmatales                 |               |               |               |                |               |
| Root;k_Bacteria;p_Tenericutes;c_Mollicutes;o_Anaeroplasmatales                 |               |               |               |                |               |
| Root;k_Bacteria;p_Tenericutes;c_Mollicutes;o_Mycoplasmatales                   | 0.5604        | 0.0057        | 0.0040        | 0.0017         | 0.0028        |
| Root;k_Bacteria;p_Tenericutes;c_Mollicutes;o_RF39                              | 0.4698        | 0.0002        | 0.0004        | -0.0002        | 0.0003        |
| Root;k_Bacteria;p_Verrucomicrobia;c_Verrucomicrobiae;o_Verrucomicrobiales      |               |               |               |                |               |

| Family level                                                                            | P value | Mean water-treated | Mean CMC-treated | Difference | SE of difference |
|-----------------------------------------------------------------------------------------|---------|--------------------|------------------|------------|------------------|
| Root;k_Bacteria;p_Actinobacteria;c_Actinobacteria;o_Actinomycetales;f_                  |         |                    |                  |            |                  |
| Root;k_Bacteria;p_Actinobacteria;c_Actinobacteria;o_Actinomycetales;f_ACK-M1            |         |                    |                  |            |                  |
| Root;k_Bacteria;p_Actinobacteria;c_Actinobacteria;o_Actinomycetales;f_Brevibacteriaceae |         |                    |                  |            |                  |

Chassaing et al, Supplemental Table 1.

|                                                                                                   |               |               |               |                |               |
|---------------------------------------------------------------------------------------------------|---------------|---------------|---------------|----------------|---------------|
| Root;k_Bacteria;p_Actinobacteria;c_Actinobacteria;o_Actinomycetales;f_Corynebacteriaceae          |               |               |               |                |               |
| Root;k_Bacteria;p_Actinobacteria;c_Actinobacteria;o_Actinomycetales;f_Dermabacteraceae            |               |               |               |                |               |
| Root;k_Bacteria;p_Actinobacteria;c_Actinobacteria;o_Actinomycetales;f_Frankiaceae                 |               |               |               |                |               |
| Root;k_Bacteria;p_Actinobacteria;c_Actinobacteria;o_Actinomycetales;f_Kineosporiaceae             |               |               |               |                |               |
| Root;k_Bacteria;p_Actinobacteria;c_Actinobacteria;o_Actinomycetales;f_Microbacteriaceae           |               |               |               |                |               |
| Root;k_Bacteria;p_Actinobacteria;c_Actinobacteria;o_Actinomycetales;f_Micrococcaceae              |               |               |               |                |               |
| Root;k_Bacteria;p_Actinobacteria;c_Actinobacteria;o_Actinomycetales;f_Nocardiaceae                |               |               |               |                |               |
| Root;k_Bacteria;p_Actinobacteria;c_Actinobacteria;o_Actinomycetales;f_Promicromonosporaceae       |               |               |               |                |               |
| Root;k_Bacteria;p_Actinobacteria;c_Actinobacteria;o_Actinomycetales;f_Streptomycetaceae           |               |               |               |                |               |
| Root;k_Bacteria;p_Actinobacteria;c_Actinobacteria;o_Bifidobacteriales;f_                          |               |               |               |                |               |
| <b>Root;k_Bacteria;p_Actinobacteria;c_Actinobacteria;o_Bifidobacteriales;f_Bifidobacteriaceae</b> | <b>0.0011</b> | <b>0.0061</b> | <b>0.0008</b> | <b>0.0054</b>  | <b>0.0011</b> |
| Root;k_Bacteria;p_Actinobacteria;c_Thermoleophilia;o_Solirubrobacterales;f_Solirubrobacteraceae   |               |               |               |                |               |
| Root;k_Bacteria;p_Bacteroidetes;c_Bacteroidia;o_Bacteroidales;f_                                  | 0.1521        | 0.0004        | 0.0013        | -0.0009        | 0.0006        |
| Root;k_Bacteria;p_Bacteroidetes;c_Bacteroidia;o_Bacteroidales;f_Bacteroidaceae                    | 0.1741        | 0.0381        | 0.0702        | -0.0321        | 0.0215        |
| Root;k_Bacteria;p_Bacteroidetes;c_Bacteroidia;o_Bacteroidales;f_Porphyrimonadaceae                | 0.7081        | 0.0040        | 0.0033        | 0.0006         | 0.0016        |
| Root;k_Bacteria;p_Bacteroidetes;c_Bacteroidia;o_Bacteroidales;f_Prevotellaceae                    | 0.4986        | 0.0178        | 0.0234        | -0.0056        | 0.0079        |
| Root;k_Bacteria;p_Bacteroidetes;c_Bacteroidia;o_Bacteroidales;f_Rikenellaceae                     | 0.2638        | 0.0117        | 0.0074        | 0.0043         | 0.0036        |
| <b>Root;k_Bacteria;p_Bacteroidetes;c_Bacteroidia;o_Bacteroidales;f_S24-7</b>                      | <b>0.0058</b> | <b>0.3348</b> | <b>0.4201</b> | <b>-0.0853</b> | <b>0.0229</b> |
| Root;k_Bacteria;p_Bacteroidetes;c_Bacteroidia;o_Bacteroidales;f_[Odoribacteraceae]                | 0.1020        | 0.0028        | 0.0019        | 0.0009         | 0.0005        |
| Root;k_Bacteria;p_Bacteroidetes;c_Flavobacteriia;o_Flavobacteriales;f_Cryomorphaceae              |               |               |               |                |               |
| Root;k_Bacteria;p_Bacteroidetes;c_Flavobacteriia;o_Flavobacteriales;f_Flavobacteriaceae           |               |               |               |                |               |
| Root;k_Bacteria;p_Bacteroidetes;c_Sphingobacteriia;o_Sphingobacteriales;f_                        |               |               |               |                |               |
| Root;k_Bacteria;p_Bacteroidetes;c_Sphingobacteriia;o_Sphingobacteriales;f_Chitinophagaceae        |               |               |               |                |               |
| Root;k_Bacteria;p_Bacteroidetes;c_Sphingobacteriia;o_Sphingobacteriales;f_Flexibacteraceae        |               |               |               |                |               |
| Root;k_Bacteria;p_Cyanobacteria;c_4COd-2;o_YS2;f_                                                 | 0.1541        | 0.0008        | 0.0025        | -0.0016        | 0.0010        |
| Root;k_Bacteria;p_Cyanobacteria;c_Chloroplast;o_Streptophyta;f_                                   | 0.3049        | 0.0002        | 0.0001        | 0.0001         | 0.0001        |
| Root;k_Bacteria;p_Deferribacteres;c_Deferribacteres;o_Deferribacterales;f_Deferribacteraceae      | 0.1592        | 0.0001        | 0.0000        | 0.0001         | 0.0001        |
| Root;k_Bacteria;p_Firmicutes;c_Bacilli;o_;                                                        |               |               |               |                |               |
| Root;k_Bacteria;p_Firmicutes;c_Bacilli;o_Bacillales;f_                                            |               |               |               |                |               |
| Root;k_Bacteria;p_Firmicutes;c_Bacilli;o_Bacillales;f_Alicyclobacillaceae                         |               |               |               |                |               |
| Root;k_Bacteria;p_Firmicutes;c_Bacilli;o_Bacillales;f_Bacillaceae                                 |               |               |               |                |               |
| Root;k_Bacteria;p_Firmicutes;c_Bacilli;o_Bacillales;f_Paenibacillaceae                            |               |               |               |                |               |
| Root;k_Bacteria;p_Firmicutes;c_Bacilli;o_Bacillales;f_Planococcaceae                              |               |               |               |                |               |
| Root;k_Bacteria;p_Firmicutes;c_Bacilli;o_Bacillales;f_Staphylococcaceae                           |               |               |               |                |               |
| Root;k_Bacteria;p_Firmicutes;c_Bacilli;o_Bacillales;f_Thermoactinomycetaceae                      |               |               |               |                |               |
| Root;k_Bacteria;p_Firmicutes;c_Bacilli;o_Lactobacillales;f_                                       |               |               |               |                |               |
| Root;k_Bacteria;p_Firmicutes;c_Bacilli;o_Lactobacillales;f_Aerococcaceae                          | 0.3466        | 0.0000        | 0.0000        | 0.0000         | 0.0000        |
| Root;k_Bacteria;p_Firmicutes;c_Bacilli;o_Lactobacillales;f_Carnobacteriaceae                      |               |               |               |                |               |
| Root;k_Bacteria;p_Firmicutes;c_Bacilli;o_Lactobacillales;f_Enterococcaceae                        |               |               |               |                |               |
| <b>Root;k_Bacteria;p_Firmicutes;c_Bacilli;o_Lactobacillales;f_Lactobacillaceae</b>                | <b>0.0444</b> | <b>0.0664</b> | <b>0.1459</b> | <b>-0.0795</b> | <b>0.0334</b> |
| Root;k_Bacteria;p_Firmicutes;c_Bacilli;o_Lactobacillales;f_Leuconostocaceae                       |               |               |               |                |               |
| Root;k_Bacteria;p_Firmicutes;c_Bacilli;o_Lactobacillales;f_Streptococcaceae                       | 0.1256        | 0.0000        | 0.0003        | -0.0002        | 0.0001        |
| <b>Root;k_Bacteria;p_Firmicutes;c_Bacilli;o_Turicibacterales;f_Turicibacteraceae</b>              | <b>0.0032</b> | <b>0.0322</b> | <b>0.0003</b> | <b>0.0319</b>  | <b>0.0077</b> |

Chassaing et al, Supplemental Table 1.

|                                                                                                   |                    |               |               |                |               |
|---------------------------------------------------------------------------------------------------|--------------------|---------------|---------------|----------------|---------------|
| <b>Root;k_Bacteria;p_Firmicutes;c_Clostridia;o_;</b> <b>f_</b>                                    | <b>0.0023</b>      | <b>0.0248</b> | <b>0.0077</b> | <b>0.0171</b>  | <b>0.0039</b> |
| Root;k_Bacteria;p_Firmicutes;c_Clostridia;o_Clostridiales;f_                                      | 0.8259             | 0.0008        | 0.0007        | 0.0001         | 0.0003        |
| Root;k_Bacteria;p_Firmicutes;c_Clostridia;o_Clostridiales;f_Clostridiaceae                        | 0.7999             | 0.0027        | 0.0031        | -0.0004        | 0.0016        |
| <b>Root;k_Bacteria;p_Firmicutes;c_Clostridia;o_Clostridiales;f_Dehalobacteriaceae</b>             | <b>&lt; 0.0001</b> | <b>0.0029</b> | <b>0.0007</b> | <b>0.0022</b>  | <b>0.0003</b> |
| Root;k_Bacteria;p_Firmicutes;c_Clostridia;o_Clostridiales;f_Eubacteriaceae                        |                    |               |               |                |               |
| <b>Root;k_Bacteria;p_Firmicutes;c_Clostridia;o_Clostridiales;f_Lachnospiraceae</b>                | <b>0.0246</b>      | <b>0.2520</b> | <b>0.1509</b> | <b>0.1011</b>  | <b>0.0366</b> |
| Root;k_Bacteria;p_Firmicutes;c_Clostridia;o_Clostridiales;f_Peptococcaceae                        |                    |               |               |                |               |
| Root;k_Bacteria;p_Firmicutes;c_Clostridia;o_Clostridiales;f_Peptostreptococcaceae                 |                    |               |               |                |               |
| <b>Root;k_Bacteria;p_Firmicutes;c_Clostridia;o_Clostridiales;f_Ruminococcaceae</b>                | <b>0.0482</b>      | <b>0.0602</b> | <b>0.0372</b> | <b>0.0230</b>  | <b>0.0099</b> |
| <b>Root;k_Bacteria;p_Firmicutes;c_Clostridia;o_Coriobacteriales;f_</b>                            | <b>0.0048</b>      | <b>0.0095</b> | <b>0.0029</b> | <b>0.0067</b>  | <b>0.0017</b> |
| <b>Root;k_Bacteria;p_Firmicutes;c_Clostridia;o_Coriobacteriales;f_Coriobacteriaceae</b>           | <b>0.0249</b>      | <b>0.0042</b> | <b>0.0018</b> | <b>0.0024</b>  | <b>0.0009</b> |
| Root;k_Bacteria;p_Firmicutes;c_Erysipelotrichi;o_Erysipelotrichales;f_Erysipelotrichaceae         | 0.3975             | 0.0418        | 0.0274        | 0.0144         | 0.0161        |
| Root;k_Bacteria;p_Firmicutes;c_Erysipelotrichi;o_Erysipelotrichales;f_[Coproba]cillaceae          | 0.0560             | 0.0001        | 0.0006        | -0.0006        | 0.0002        |
| Root;k_Bacteria;p_Planctomycetes;c_Planctomycetia;o_Gemmatales;f_Gemmataceae                      |                    |               |               |                |               |
| Root;k_Bacteria;p_Planctomycetes;c_Planctomycetia;o_Pirellulales;f_Pirellulaceae                  |                    |               |               |                |               |
| Root;k_Bacteria;p_Planctomycetes;c_Planctomycetia;o_Planctomycetales;f_Planctomycetaceae          |                    |               |               |                |               |
| Root;k_Bacteria;p_Proteobacteria;c_Alphaproteobacteria;o_;                                        | 0.3466             | 0.0000        | 0.0001        | -0.0001        | 0.0001        |
| Root;k_Bacteria;p_Proteobacteria;c_Alphaproteobacteria;o_RF32;f_                                  | 0.5994             | 0.0000        | 0.0001        | 0.0000         | 0.0001        |
| Root;k_Bacteria;p_Proteobacteria;c_Alphaproteobacteria;o_Rhizobiales;f_Brucellaceae               |                    |               |               |                |               |
| Root;k_Bacteria;p_Proteobacteria;c_Alphaproteobacteria;o_Rhizobiales;f_Hyphomicrobiaceae          |                    |               |               |                |               |
| Root;k_Bacteria;p_Proteobacteria;c_Alphaproteobacteria;o_Rhizobiales;f_Methylobacteriaceae        |                    |               |               |                |               |
| Root;k_Bacteria;p_Proteobacteria;c_Alphaproteobacteria;o_Rhizobiales;f_Rhizobiaceae               |                    |               |               |                |               |
| Root;k_Bacteria;p_Proteobacteria;c_Alphaproteobacteria;o_Rhodobacterales;f_Rhodobacteraceae       |                    |               |               |                |               |
| Root;k_Bacteria;p_Proteobacteria;c_Alphaproteobacteria;o_Rickettsiales;f_mitochondria             | 0.3466             | 0.0000        | 0.0000        | 0.0000         | 0.0000        |
| Root;k_Bacteria;p_Proteobacteria;c_Alphaproteobacteria;o_Sphingomonadales;f_Sphingomonadaceae     |                    |               |               |                |               |
| <b>Root;k_Bacteria;p_Proteobacteria;c_Betaproteobacteria;o_Burkholderiales;f_Alcaligenaceae</b>   | <b>0.0029</b>      | <b>0.0085</b> | <b>0.0333</b> | <b>-0.0248</b> | <b>0.0058</b> |
| Root;k_Bacteria;p_Proteobacteria;c_Betaproteobacteria;o_Burkholderiales;f_Burkholderiaceae        |                    |               |               |                |               |
| Root;k_Bacteria;p_Proteobacteria;c_Betaproteobacteria;o_Burkholderiales;f_Comamonadaceae          |                    |               |               |                |               |
| <b>Root;k_Bacteria;p_Proteobacteria;c_Betaproteobacteria;o_Burkholderiales;f_Oxalobacteraceae</b> | <b>0.0152</b>      | <b>0.0000</b> | <b>0.0002</b> | <b>-0.0002</b> | <b>0.0001</b> |
| Root;k_Bacteria;p_Proteobacteria;c_Betaproteobacteria;o_Methylophilales;f_Methylophilaceae        |                    |               |               |                |               |
| Root;k_Bacteria;p_Proteobacteria;c_Betaproteobacteria;o_Rhodocyclales;f_Rhodocyclaceae            |                    |               |               |                |               |
| Root;k_Bacteria;p_Proteobacteria;c_Deltaproteobacteria;o_Desulfovibrionales;f_Desulfovibrionaceae | 0.3526             | 0.0466        | 0.0320        | 0.0146         | 0.0148        |
| Root;k_Bacteria;p_Proteobacteria;c_Deltaproteobacteria;o_Myxococcales;f_                          |                    |               |               |                |               |
| Root;k_Bacteria;p_Proteobacteria;c_Deltaproteobacteria;o_Myxococcales;f_Nannocystaceae            |                    |               |               |                |               |
| Root;k_Bacteria;p_Proteobacteria;c_Deltaproteobacteria;o_Spirobacillales;f_                       |                    |               |               |                |               |
| Root;k_Bacteria;p_Proteobacteria;c_Epsilonproteobacteria;o_Campylobacterales;f_Helicobacteraceae  | 0.4198             | 0.0239        | 0.0192        | 0.0047         | 0.0056        |
| Root;k_Bacteria;p_Proteobacteria;c_Gammaproteobacteria;o_Aeromonadales;f_                         |                    |               |               |                |               |
| Root;k_Bacteria;p_Proteobacteria;c_Gammaproteobacteria;o_Aeromonadales;f_Aeromonadaceae           |                    |               |               |                |               |
| Root;k_Bacteria;p_Proteobacteria;c_Gammaproteobacteria;o_Enterobacteriales;f_Enterobacteriaceae   |                    |               |               |                |               |
| Root;k_Bacteria;p_Proteobacteria;c_Gammaproteobacteria;o_Pasteurellales;f_Pasteurellaceae         |                    |               |               |                |               |
| Root;k_Bacteria;p_Proteobacteria;c_Gammaproteobacteria;o_Pseudomonadales;f_Moraxellaceae          |                    |               |               |                |               |
| Root;k_Bacteria;p_Proteobacteria;c_Gammaproteobacteria;o_Pseudomonadales;f_Pseudomonadaceae       |                    |               |               |                |               |
| Root;k_Bacteria;p_Proteobacteria;c_Gammaproteobacteria;o_Xanthomonadales;f_Xanthomonadaceae       |                    |               |               |                |               |

|                                                                                                 |               |               |               |               |               |
|-------------------------------------------------------------------------------------------------|---------------|---------------|---------------|---------------|---------------|
| <b>Root;k_Bacteria;p_TM7;c_TM7-3;o_CW040;f_F16</b>                                              | <b>0.0036</b> | <b>0.0003</b> | <b>0.0000</b> | <b>0.0002</b> | <b>0.0001</b> |
| Root;k_Bacteria;p_Tenericutes;c_Mollicutes;o_Acholeplasmatales;f_Acholeplasmataceae             |               |               |               |               |               |
| Root;k_Bacteria;p_Tenericutes;c_Mollicutes;o_Anaeroplasmatales;f_Anaeroplasmataceae             |               |               |               |               |               |
| Root;k_Bacteria;p_Tenericutes;c_Mollicutes;o_Mycoplasmatales;f_Mycoplasmataceae                 | 0.5604        | 0.0057        | 0.0040        | 0.0017        | 0.0028        |
| Root;k_Bacteria;p_Tenericutes;c_Mollicutes;o_RF39;f__                                           | 0.4698        | 0.0002        | 0.0004        | -0.0002       | 0.0003        |
| Root;k_Bacteria;p_Verrucomicrobia;c_Verrucomicrobiae;o_Verrucomicrobiales;f_Verrucomicrobiaceae |               |               |               |               |               |

## WT water versus WT CMC - Mucosa Associated Bacteria

| Phyla level                              | P value       | Mean water-treated | Mean CMC-treated | Difference     | SE of difference |
|------------------------------------------|---------------|--------------------|------------------|----------------|------------------|
| Root;k_Bacteria;p_Actinobacteria         | 0.0963        | 0.0003             | 0.0001           | 0.0002         | 0.0001           |
| Root;k_Bacteria;p_Bacteroidetes          | 0.0817        | 0.1839             | 0.0537           | 0.1303         | 0.0654           |
| Root;k_Bacteria;p_Cyanobacteria          | 0.1225        | 0.0033             | 0.0012           | 0.0021         | 0.0012           |
| <b>Root;k_Bacteria;p_Deferribacteres</b> | <b>0.0309</b> | <b>0.0001</b>      | <b>0.0010</b>    | <b>-0.0009</b> | <b>0.0004</b>    |
| Root;k_Bacteria;p_Firmicutes             | 0.5854        | 0.4676             | 0.3917           | 0.0759         | 0.1336           |
| Root;k_Bacteria;p_Planctomycetes         | 0.3466        | 0.0000             | 0.0000           | 0.0000         | 0.0000           |
| Root;k_Bacteria;p_Proteobacteria         | 0.2617        | 0.3393             | 0.5302           | -0.1909        | 0.1581           |
| Root;k_Bacteria;p_TM7                    | 0.6563        | 0.0001             | 0.0001           | 0.0000         | 0.0001           |
| Root;k_Bacteria;p_Tenericutes            | 0.1512        | 0.0053             | 0.0215           | -0.0161        | 0.0102           |
| Root;k_Bacteria;p_Verrucomicrobia        | 0.1070        | 0.0000             | 0.0006           | -0.0006        | 0.0003           |

| Class level                                              | P value  | Mean water-treated | Mean CMC-treated | Difference | SE of difference |
|----------------------------------------------------------|----------|--------------------|------------------|------------|------------------|
| Root;k_Bacteria;p_Actinobacteria;c_Actinobacteria        | 0.696    | 0.000              | 0.000            | 0.000      | 0.000            |
| Root;k_Bacteria;p_Actinobacteria;c_Thermoleophilia       |          |                    |                  |            |                  |
| Root;k_Bacteria;p_Bacteroidetes;c_Bacteroidia            | 0.509    | 0.109              | 0.166            | -0.057     | 0.083            |
| Root;k_Bacteria;p_Bacteroidetes;c_Flavobacteriia         |          |                    |                  |            |                  |
| Root;k_Bacteria;p_Bacteroidetes;c_Sphingobacteriia       |          |                    |                  |            |                  |
| Root;k_Bacteria;p_Cyanobacteria;c_4C0d-2                 | 0.370    | 0.002              | 0.004            | -0.002     | 0.002            |
| Root;k_Bacteria;p_Cyanobacteria;c_Chloroplast            | 0.347    | 0.000              | 0.000            | 0.000      | 0.000            |
| Root;k_Bacteria;p_Deferribacteres;c_Deferribacteres      | > 0.9999 | 0.000              | 0.000            | 0.000      | 0.000            |
| Root;k_Bacteria;p_Firmicutes;c_Bacilli                   | 0.302    | 0.016              | 0.007            | 0.009      | 0.008            |
| Root;k_Bacteria;p_Firmicutes;c_Clostridia                | 0.969    | 0.443              | 0.448            | -0.005     | 0.123            |
| Root;k_Bacteria;p_Firmicutes;c_Erysipelotrichi           | 0.403    | 0.001              | 0.002            | -0.001     | 0.001            |
| Root;k_Bacteria;p_Planctomycetes;c_Planctomycetia        | 0.347    | 0.000              | 0.000            | 0.000      | 0.000            |
| Root;k_Bacteria;p_Proteobacteria;c_Alphaproteobacteria   | 0.775    | 0.001              | 0.001            | 0.000      | 0.001            |
| Root;k_Bacteria;p_Proteobacteria;c_Betaproteobacteria    | 0.229    | 0.001              | 0.006            | -0.005     | 0.004            |
| Root;k_Bacteria;p_Proteobacteria;c_Deltaproteobacteria   | 0.603    | 0.015              | 0.020            | -0.005     | 0.010            |
| Root;k_Bacteria;p_Proteobacteria;c_Epsilonproteobacteria | 0.648    | 0.403              | 0.322            | 0.082      | 0.172            |
| Root;k_Bacteria;p_Proteobacteria;c_Gammaproteobacteria   | 0.332    | 0.000              | 0.001            | 0.000      | 0.000            |
| Root;k_Bacteria;p_TM7;c_TM7-3                            | 0.983    | 0.000              | 0.000            | 0.000      | 0.000            |
| Root;k_Bacteria;p_Tenericutes;c_Mollicutes               | 0.187    | 0.007              | 0.022            | -0.015     | 0.010            |
| Root;k_Bacteria;p_Verrucomicrobia;c_Verrucomicrobiae     | 0.097    | 0.000              | 0.000            | 0.000      | 0.000            |

| Order level                                                              | P value | Mean water-treated | Mean CMC-treated | Difference | SE of difference |
|--------------------------------------------------------------------------|---------|--------------------|------------------|------------|------------------|
| Root;k_Bacteria;p_Actinobacteria;c_Actinobacteria;o_Actinomycetales      | 0.3466  | 0.0000             | 0.0000           | 0.0000     | 0.0000           |
| Root;k_Bacteria;p_Actinobacteria;c_Actinobacteria;o_Bifidobacteriales    | 0.4637  | 0.0002             | 0.0001           | 0.0001     | 0.0001           |
| Root;k_Bacteria;p_Actinobacteria;c_Thermoleophilia;o_Solirubrobacterales |         |                    |                  |            |                  |
| Root;k_Bacteria;p_Bacteroidetes;c_Bacteroidia;o_Bacteroidales            | 0.5091  | 0.1090             | 0.1660           | -0.0570    | 0.0826           |
| Root;k_Bacteria;p_Bacteroidetes;c_Flavobacteriia;o_Flavobacteriales      |         |                    |                  |            |                  |
| Root;k_Bacteria;p_Bacteroidetes;c_Sphingobacteriia;o_Sphingobacteriales  |         |                    |                  |            |                  |

|                                                                               |          |        |        |         |        |
|-------------------------------------------------------------------------------|----------|--------|--------|---------|--------|
| Root;k_Bacteria;p_Cyanobacteria;c_4C0d-2;o_Y52                                | 0.3696   | 0.0022 | 0.0039 | -0.0017 | 0.0018 |
| Root;k_Bacteria;p_Cyanobacteria;c_Chloroplast;o_Streptophyta                  | 0.3466   | 0.0000 | 0.0001 | -0.0001 | 0.0001 |
| Root;k_Bacteria;p_Derribacteres;c_Derribacteres;o_Derribacterales             | > 0.9999 | 0.0004 | 0.0004 | 0.0000  | 0.0004 |
| Root;k_Bacteria;p_Firmicutes;c_Bacilli;o_                                     |          |        |        |         |        |
| Root;k_Bacteria;p_Firmicutes;c_Bacilli;o_Bacillales                           |          |        |        |         |        |
| Root;k_Bacteria;p_Firmicutes;c_Bacilli;o_Lactobacillales                      | 0.3681   | 0.0077 | 0.0034 | 0.0043  | 0.0045 |
| Root;k_Bacteria;p_Firmicutes;c_Bacilli;o_Turicibacterales                     | 0.2786   | 0.0087 | 0.0038 | 0.0049  | 0.0043 |
| Root;k_Bacteria;p_Firmicutes;c_Clostridia;o_                                  | 0.1856   | 0.0151 | 0.0268 | -0.0116 | 0.0080 |
| Root;k_Bacteria;p_Firmicutes;c_Clostridia;o_Clostridiales                     | 0.9645   | 0.4207 | 0.4153 | 0.0054  | 0.1179 |
| Root;k_Bacteria;p_Firmicutes;c_Clostridia;o_Coriobacteriales                  | 0.7387   | 0.0075 | 0.0062 | 0.0013  | 0.0039 |
| Root;k_Bacteria;p_Firmicutes;c_Erysipelotrichi;o_Erysipelotrichales           | 0.4030   | 0.0012 | 0.0024 | -0.0012 | 0.0014 |
| Root;k_Bacteria;p_Planctomycetes;c_Planctomycetia;o_Gemmatales                |          |        |        |         |        |
| Root;k_Bacteria;p_Planctomycetes;c_Planctomycetia;o_Pirellulales              |          |        |        |         |        |
| Root;k_Bacteria;p_Planctomycetes;c_Planctomycetia;o_Planctomycetales          | 0.3466   | 0.0000 | 0.0000 | 0.0000  | 0.0000 |
| Root;k_Bacteria;p_Proteobacteria;c_Alphaproteobacteria;o_                     | 0.6530   | 0.0002 | 0.0001 | 0.0001  | 0.0002 |
| Root;k_Bacteria;p_Proteobacteria;c_Alphaproteobacteria;o_RF32                 | 0.8168   | 0.0006 | 0.0005 | 0.0001  | 0.0005 |
| Root;k_Bacteria;p_Proteobacteria;c_Alphaproteobacteria;o_Rhizobiales          |          |        |        |         |        |
| Root;k_Bacteria;p_Proteobacteria;c_Alphaproteobacteria;o_Rhodobacterales      |          |        |        |         |        |
| Root;k_Bacteria;p_Proteobacteria;c_Alphaproteobacteria;o_Rickettsiales        |          |        |        |         |        |
| Root;k_Bacteria;p_Proteobacteria;c_Alphaproteobacteria;o_Sphingomonadales     |          |        |        |         |        |
| Root;k_Bacteria;p_Proteobacteria;c_Betaproteobacteria;o_Burkholderiales       | 0.2229   | 0.0010 | 0.0059 | -0.0050 | 0.0038 |
| Root;k_Bacteria;p_Proteobacteria;c_Betaproteobacteria;o_Methylophilales       | 0.3466   | 0.0000 | 0.0000 | 0.0000  | 0.0000 |
| Root;k_Bacteria;p_Proteobacteria;c_Betaproteobacteria;o_Rhodocyclales         | 0.3466   | 0.0001 | 0.0000 | 0.0001  | 0.0001 |
| Root;k_Bacteria;p_Proteobacteria;c_Deltaproteobacteria;o_Desulfovibrionales   | 0.6029   | 0.0152 | 0.0205 | -0.0053 | 0.0098 |
| Root;k_Bacteria;p_Proteobacteria;c_Deltaproteobacteria;o_Myxococcales         |          |        |        |         |        |
| Root;k_Bacteria;p_Proteobacteria;c_Deltaproteobacteria;o_Spirobacillales      |          |        |        |         |        |
| Root;k_Bacteria;p_Proteobacteria;c_Epsilonproteobacteria;o_Campylobacteriales | 0.6483   | 0.4035 | 0.3219 | 0.0815  | 0.1721 |
| Root;k_Bacteria;p_Proteobacteria;c_Gammaproteobacteria;o_Aeromonadales        | 0.3466   | 0.0000 | 0.0000 | 0.0000  | 0.0000 |
| Root;k_Bacteria;p_Proteobacteria;c_Gammaproteobacteria;o_Enterobacteriales    |          |        |        |         |        |
| Root;k_Bacteria;p_Proteobacteria;c_Gammaproteobacteria;o_Pasteurellales       | 0.3466   | 0.0000 | 0.0005 | -0.0005 | 0.0005 |
| Root;k_Bacteria;p_Proteobacteria;c_Gammaproteobacteria;o_Pseudomonadales      | 0.3466   | 0.0000 | 0.0000 | 0.0000  | 0.0000 |
| Root;k_Bacteria;p_Proteobacteria;c_Gammaproteobacteria;o_Xanthomonadales      |          |        |        |         |        |
| Root;k_Bacteria;p_TM7;c_TM7-3;o_CW040                                         | 0.9827   | 0.0001 | 0.0001 | 0.0000  | 0.0001 |
| Root;k_Bacteria;p_Tenericutes;c_Mollicutes;o_Acholeplasmatales                |          |        |        |         |        |
| Root;k_Bacteria;p_Tenericutes;c_Mollicutes;o_Anaeroplasmatales                |          |        |        |         |        |
| Root;k_Bacteria;p_Tenericutes;c_Mollicutes;o_Mycoplasmatales                  | 0.1987   | 0.0065 | 0.0210 | -0.0146 | 0.0104 |
| Root;k_Bacteria;p_Tenericutes;c_Mollicutes;o_RF39                             | 0.5035   | 0.0003 | 0.0006 | -0.0002 | 0.0003 |
| Root;k_Bacteria;p_Verrucomicrobia;c_Verrucomicrobiae;o_Verrucomicrobiales     | 0.0966   | 0.0000 | 0.0005 | -0.0005 | 0.0002 |

| Family level                                                                            | P value | Mean water-treated | Mean CMC-treated | Difference | SE of difference |
|-----------------------------------------------------------------------------------------|---------|--------------------|------------------|------------|------------------|
| Root;k_Bacteria;p_Actinobacteria;c_Actinobacteria;o_Actinomycetales;f_                  |         |                    |                  |            |                  |
| Root;k_Bacteria;p_Actinobacteria;c_Actinobacteria;o_Actinomycetales;f_ACK-M1            |         |                    |                  |            |                  |
| Root;k_Bacteria;p_Actinobacteria;c_Actinobacteria;o_Actinomycetales;f_Brevibacteriaceae |         |                    |                  |            |                  |

Chassaing et al, Supplemental Table 1.

|                                                                                                 |          |        |        |         |        |
|-------------------------------------------------------------------------------------------------|----------|--------|--------|---------|--------|
| Root;k_Bacteria;p_Actinobacteria;c_Actinobacteria;o_Actinomycetales;f_Corynebacteriaceae        |          |        |        |         |        |
| Root;k_Bacteria;p_Actinobacteria;c_Actinobacteria;o_Actinomycetales;f_Dermabacteraceae          |          |        |        |         |        |
| Root;k_Bacteria;p_Actinobacteria;c_Actinobacteria;o_Actinomycetales;f_Frankiaceae               |          |        |        |         |        |
| Root;k_Bacteria;p_Actinobacteria;c_Actinobacteria;o_Actinomycetales;f_Kineosporiaceae           |          |        |        |         |        |
| Root;k_Bacteria;p_Actinobacteria;c_Actinobacteria;o_Actinomycetales;f_Microbacteriaceae         |          |        |        |         |        |
| Root;k_Bacteria;p_Actinobacteria;c_Actinobacteria;o_Actinomycetales;f_Micrococcaceae            | 0.3466   | 0.0000 | 0.0000 | 0.0000  | 0.0000 |
| Root;k_Bacteria;p_Actinobacteria;c_Actinobacteria;o_Actinomycetales;f_Nocardiaceae              |          |        |        |         |        |
| Root;k_Bacteria;p_Actinobacteria;c_Actinobacteria;o_Actinomycetales;f_Promicromonosporaceae     |          |        |        |         |        |
| Root;k_Bacteria;p_Actinobacteria;c_Actinobacteria;o_Actinomycetales;f_Streptomycetaceae         |          |        |        |         |        |
| Root;k_Bacteria;p_Actinobacteria;c_Actinobacteria;o_Bifidobacteriales;f_                        |          |        |        |         |        |
| Root;k_Bacteria;p_Actinobacteria;c_Actinobacteria;o_Bifidobacteriales;f_Bifidobacteriaceae      | 0.4637   | 0.0002 | 0.0001 | 0.0001  | 0.0001 |
| Root;k_Bacteria;p_Actinobacteria;c_Thermoleophilia;o_Solirubrobacterales;f_Solirubrobacteraceae |          |        |        |         |        |
| Root;k_Bacteria;p_Bacteroidetes;c_Bacteroidia;o_Bacteroidales;f_                                | 0.8569   | 0.0017 | 0.0014 | 0.0003  | 0.0014 |
| Root;k_Bacteria;p_Bacteroidetes;c_Bacteroidia;o_Bacteroidales;f_Bacteroidaceae                  | 0.4499   | 0.0157 | 0.0290 | -0.0133 | 0.0167 |
| Root;k_Bacteria;p_Bacteroidetes;c_Bacteroidia;o_Bacteroidales;f_Porphyrimonadaceae              | 0.3261   | 0.0042 | 0.0084 | -0.0041 | 0.0039 |
| Root;k_Bacteria;p_Bacteroidetes;c_Bacteroidia;o_Bacteroidales;f_Prevotellaceae                  | 0.2824   | 0.0036 | 0.0094 | -0.0058 | 0.0050 |
| Root;k_Bacteria;p_Bacteroidetes;c_Bacteroidia;o_Bacteroidales;f_Rikenellaceae                   | 0.7818   | 0.0152 | 0.0184 | -0.0032 | 0.0111 |
| Root;k_Bacteria;p_Bacteroidetes;c_Bacteroidia;o_Bacteroidales;f_S24-7                           | 0.4446   | 0.0592 | 0.0932 | -0.0340 | 0.0423 |
| Root;k_Bacteria;p_Bacteroidetes;c_Bacteroidia;o_Bacteroidales;f_[Odoribacteraceae]              | 0.5851   | 0.0093 | 0.0063 | 0.0031  | 0.0054 |
| Root;k_Bacteria;p_Bacteroidetes;c_Flavobacteriia;o_Flavobacteriales;f_Cryomorphaceae            |          |        |        |         |        |
| Root;k_Bacteria;p_Bacteroidetes;c_Flavobacteriia;o_Flavobacteriales;f_Flavobacteriaceae         |          |        |        |         |        |
| Root;k_Bacteria;p_Bacteroidetes;c_Sphingobacteriia;o_Sphingobacteriales;f_                      |          |        |        |         |        |
| Root;k_Bacteria;p_Bacteroidetes;c_Sphingobacteriia;o_Sphingobacteriales;f_Chitinophagaceae      |          |        |        |         |        |
| Root;k_Bacteria;p_Bacteroidetes;c_Sphingobacteriia;o_Sphingobacteriales;f_Flexibacteraceae      |          |        |        |         |        |
| Root;k_Bacteria;p_Cyanobacteria;c_4C0d-2;o_YS2;f_                                               | 0.3696   | 0.0022 | 0.0039 | -0.0017 | 0.0018 |
| Root;k_Bacteria;p_Cyanobacteria;c_Chloroplast;o_Streptophyta;f_                                 | 0.3466   | 0.0000 | 0.0001 | -0.0001 | 0.0001 |
| Root;k_Bacteria;p_Deferribacteres;c_Deferribacteres;o_Deferribacterales;f_Deferribacteraceae    | > 0.9999 | 0.0004 | 0.0004 | 0.0000  | 0.0004 |
| Root;k_Bacteria;p_Firmicutes;c_Bacilli;o_;                                                      |          |        |        |         |        |
| Root;k_Bacteria;p_Firmicutes;c_Bacilli;o_Bacillales;f_                                          |          |        |        |         |        |
| Root;k_Bacteria;p_Firmicutes;c_Bacilli;o_Bacillales;f_Alicyclobacillaceae                       |          |        |        |         |        |
| Root;k_Bacteria;p_Firmicutes;c_Bacilli;o_Bacillales;f_Bacillaceae                               |          |        |        |         |        |
| Root;k_Bacteria;p_Firmicutes;c_Bacilli;o_Bacillales;f_Paenibacillaceae                          |          |        |        |         |        |
| Root;k_Bacteria;p_Firmicutes;c_Bacilli;o_Bacillales;f_Planococcaceae                            |          |        |        |         |        |
| Root;k_Bacteria;p_Firmicutes;c_Bacilli;o_Bacillales;f_Staphylococcaceae                         |          |        |        |         |        |
| Root;k_Bacteria;p_Firmicutes;c_Bacilli;o_Bacillales;f_Thermoactinomycetaceae                    |          |        |        |         |        |
| Root;k_Bacteria;p_Firmicutes;c_Bacilli;o_Lactobacillales;f_                                     |          |        |        |         |        |
| Root;k_Bacteria;p_Firmicutes;c_Bacilli;o_Lactobacillales;f_Aerococcaceae                        |          |        |        |         |        |
| Root;k_Bacteria;p_Firmicutes;c_Bacilli;o_Lactobacillales;f_Carnobacteriaceae                    |          |        |        |         |        |
| Root;k_Bacteria;p_Firmicutes;c_Bacilli;o_Lactobacillales;f_Enterococcaceae                      |          |        |        |         |        |
| Root;k_Bacteria;p_Firmicutes;c_Bacilli;o_Lactobacillales;f_Lactobacillaceae                     | 0.3686   | 0.0077 | 0.0034 | 0.0043  | 0.0045 |
| Root;k_Bacteria;p_Firmicutes;c_Bacilli;o_Lactobacillales;f_Leuconostocaceae                     |          |        |        |         |        |
| Root;k_Bacteria;p_Firmicutes;c_Bacilli;o_Lactobacillales;f_Streptococcaceae                     | 0.3466   | 0.0000 | 0.0000 | 0.0000  | 0.0000 |
| Root;k_Bacteria;p_Firmicutes;c_Bacilli;o_Turicibacterales;f_Turicibacteraceae                   | 0.2786   | 0.0087 | 0.0038 | 0.0049  | 0.0043 |

Chassaing et al, Supplemental Table 1.



|                                                                                                   |        |        |        |         |        |
|---------------------------------------------------------------------------------------------------|--------|--------|--------|---------|--------|
| Root;k_Bacteria;p_Firmicutes;c_Clostridia;o_ ;f_                                                  | 0.1856 | 0.0151 | 0.0268 | -0.0116 | 0.0080 |
| Root;k_Bacteria;p_Firmicutes;c_Clostridia;o_Clostridiales;f_                                      | 0.4524 | 0.0062 | 0.0033 | 0.0030  | 0.0037 |
| Root;k_Bacteria;p_Firmicutes;c_Clostridia;o_Clostridiales;f_Clostridiaceae                        | 0.8683 | 0.0016 | 0.0018 | -0.0001 | 0.0007 |
| Root;k_Bacteria;p_Firmicutes;c_Clostridia;o_Clostridiales;f_Dehalobacteriaceae                    | 0.1454 | 0.0014 | 0.0021 | -0.0007 | 0.0004 |
| Root;k_Bacteria;p_Firmicutes;c_Clostridia;o_Clostridiales;f_Eubacteriaceae                        |        |        |        |         |        |
| Root;k_Bacteria;p_Firmicutes;c_Clostridia;o_Clostridiales;f_Lachnospiraceae                       | 0.9579 | 0.2963 | 0.3009 | -0.0046 | 0.0840 |
| Root;k_Bacteria;p_Firmicutes;c_Clostridia;o_Clostridiales;f_Peptococcaceae                        |        |        |        |         |        |
| Root;k_Bacteria;p_Firmicutes;c_Clostridia;o_Clostridiales;f_Peptostreptococcaceae                 | 0.3466 | 0.0000 | 0.0000 | 0.0000  | 0.0000 |
| Root;k_Bacteria;p_Firmicutes;c_Clostridia;o_Clostridiales;f_Ruminococcaceae                       | 0.8275 | 0.1150 | 0.1073 | 0.0078  | 0.0345 |
| Root;k_Bacteria;p_Firmicutes;c_Clostridia;o_Coriobacteriales;f_                                   | 0.7989 | 0.0071 | 0.0061 | 0.0010  | 0.0038 |
| Root;k_Bacteria;p_Firmicutes;c_Clostridia;o_Coriobacteriales;f_Coriobacteriaceae                  | 0.1580 | 0.0004 | 0.0001 | 0.0003  | 0.0002 |
| Root;k_Bacteria;p_Firmicutes;c_Erysipelotrichi;o_Erysipelotrichales;f_Erysipelotrichaceae         | 0.4736 | 0.0012 | 0.0022 | -0.0010 | 0.0014 |
| Root;k_Bacteria;p_Firmicutes;c_Erysipelotrichi;o_Erysipelotrichales;f_[Coprobacillaceae]          | 0.0530 | 0.0000 | 0.0002 | -0.0002 | 0.0001 |
| Root;k_Bacteria;p_Planctomycetes;c_Planctomycetia;o_Gemmatales;f_Gemmataceae                      |        |        |        |         |        |
| Root;k_Bacteria;p_Planctomycetes;c_Planctomycetia;o_Pirellulales;f_Pirellulaceae                  |        |        |        |         |        |
| Root;k_Bacteria;p_Planctomycetes;c_Planctomycetia;o_Planctomycetales;f_Planctomycetaceae          | 0.3466 | 0.0000 | 0.0000 | 0.0000  | 0.0000 |
| Root;k_Bacteria;p_Proteobacteria;c_Alphaproteobacteria;o_ ;f_                                     | 0.6530 | 0.0002 | 0.0001 | 0.0001  | 0.0002 |
| Root;k_Bacteria;p_Proteobacteria;c_Alphaproteobacteria;o_RF32;f_                                  | 0.8168 | 0.0006 | 0.0005 | 0.0001  | 0.0005 |
| Root;k_Bacteria;p_Proteobacteria;c_Alphaproteobacteria;o_Rhizobiales;f_Brucellaceae               |        |        |        |         |        |
| Root;k_Bacteria;p_Proteobacteria;c_Alphaproteobacteria;o_Rhizobiales;f_Hyphomicrobiaceae          |        |        |        |         |        |
| Root;k_Bacteria;p_Proteobacteria;c_Alphaproteobacteria;o_Rhizobiales;f_Methylobacteriaceae        |        |        |        |         |        |
| Root;k_Bacteria;p_Proteobacteria;c_Alphaproteobacteria;o_Rhizobiales;f_Rhizobiaceae               |        |        |        |         |        |
| Root;k_Bacteria;p_Proteobacteria;c_Alphaproteobacteria;o_Rhodobacterales;f_Rhodobacteraceae       |        |        |        |         |        |
| Root;k_Bacteria;p_Proteobacteria;c_Alphaproteobacteria;o_Rickettsiales;f_mitochondria             |        |        |        |         |        |
| Root;k_Bacteria;p_Proteobacteria;c_Alphaproteobacteria;o_Sphingomonadales;f_Sphingomonadaceae     |        |        |        |         |        |
| Root;k_Bacteria;p_Proteobacteria;c_Betaproteobacteria;o_Burkholderiales;f_Alcaligenaceae          | 0.2229 | 0.0010 | 0.0059 | -0.0050 | 0.0038 |
| Root;k_Bacteria;p_Proteobacteria;c_Betaproteobacteria;o_Burkholderiales;f_Burkholderiaceae        |        |        |        |         |        |
| Root;k_Bacteria;p_Proteobacteria;c_Betaproteobacteria;o_Burkholderiales;f_Comamonadaceae          |        |        |        |         |        |
| Root;k_Bacteria;p_Proteobacteria;c_Betaproteobacteria;o_Burkholderiales;f_Oxalobacteraceae        |        |        |        |         |        |
| Root;k_Bacteria;p_Proteobacteria;c_Betaproteobacteria;o_Methylophilales;f_Methylophilaceae        | 0.3466 | 0.0000 | 0.0000 | 0.0000  | 0.0000 |
| Root;k_Bacteria;p_Proteobacteria;c_Betaproteobacteria;o_Rhodocyclales;f_Rhodocyclaceae            | 0.3466 | 0.0001 | 0.0000 | 0.0001  | 0.0001 |
| Root;k_Bacteria;p_Proteobacteria;c_Deltaproteobacteria;o_Desulfovibrionales;f_Desulfovibrionaceae | 0.6029 | 0.0152 | 0.0205 | -0.0053 | 0.0098 |
| Root;k_Bacteria;p_Proteobacteria;c_Deltaproteobacteria;o_Myxococcales;f_                          |        |        |        |         |        |
| Root;k_Bacteria;p_Proteobacteria;c_Deltaproteobacteria;o_Myxococcales;f_Nannocystaceae            |        |        |        |         |        |
| Root;k_Bacteria;p_Proteobacteria;c_Deltaproteobacteria;o_Spirobacillales;f_                       |        |        |        |         |        |
| Root;k_Bacteria;p_Proteobacteria;c_Epsilonproteobacteria;o_Campylobacterales;f_Helicobacteraceae  | 0.6483 | 0.4035 | 0.3219 | 0.0815  | 0.1721 |
| Root;k_Bacteria;p_Proteobacteria;c_Gammaproteobacteria;o_Aeromonadales;f_                         |        |        |        |         |        |
| Root;k_Bacteria;p_Proteobacteria;c_Gammaproteobacteria;o_Aeromonadales;f_Aeromonadaceae           | 0.3466 | 0.0000 | 0.0000 | 0.0000  | 0.0000 |
| Root;k_Bacteria;p_Proteobacteria;c_Gammaproteobacteria;o_Enterobacteriales;f_Enterobacteriaceae   |        |        |        |         |        |
| Root;k_Bacteria;p_Proteobacteria;c_Gammaproteobacteria;o_Pasteurellales;f_Pasteurellaceae         | 0.3466 | 0.0000 | 0.0005 | -0.0005 | 0.0005 |
| Root;k_Bacteria;p_Proteobacteria;c_Gammaproteobacteria;o_Pseudomonadales;f_Moraxellaceae          | 0.3466 | 0.0000 | 0.0000 | 0.0000  | 0.0000 |
| Root;k_Bacteria;p_Proteobacteria;c_Gammaproteobacteria;o_Pseudomonadales;f_Pseudomonadaceae       |        |        |        |         |        |
| Root;k_Bacteria;p_Proteobacteria;c_Gammaproteobacteria;o_Xanthomonadales;f_Xanthomonadaceae       |        |        |        |         |        |

Chassaing et al, Supplemental Table 1.

|                                                                                                      |        |        |        |         |        |
|------------------------------------------------------------------------------------------------------|--------|--------|--------|---------|--------|
| Root;k__Bacteria;p__TM7;c__TM7-3;o__CW040;f__F16                                                     | 0.9827 | 0.0001 | 0.0001 | 0.0000  | 0.0001 |
| Root;k__Bacteria;p__Tenericutes;c__Mollicutes;o__Acholeplasmatales;f__Acholeplasmataceae             |        |        |        |         |        |
| Root;k__Bacteria;p__Tenericutes;c__Mollicutes;o__Anaeroplasmatales;f__Anaeroplasmataceae             |        |        |        |         |        |
| Root;k__Bacteria;p__Tenericutes;c__Mollicutes;o__Mycoplasmatales;f__Mycoplasmataceae                 | 0.1987 | 0.0065 | 0.0210 | -0.0146 | 0.0104 |
| Root;k__Bacteria;p__Tenericutes;c__Mollicutes;o__RF39;f__                                            | 0.5035 | 0.0003 | 0.0006 | -0.0002 | 0.0003 |
| Root;k__Bacteria;p__Verrucomicrobia;c__Verrucomicrobiae;o__Verrucomicrobiales;f__Verrucomicrobiaceae | 0.0966 | 0.0000 | 0.0005 | -0.0005 | 0.0002 |

## WT water versus WT P80 - Feces

| Phyla level                         | P value | Mean water-treated | Mean P80-treated | Difference | SE of difference |
|-------------------------------------|---------|--------------------|------------------|------------|------------------|
| Root;k__Bacteria;p__Actinobacteria  | 0.7490  | 0.0061             | 0.0055           | 0.0006     | 0.0018           |
| Root;k__Bacteria;p__Bacteroidetes   | 0.6913  | 0.4096             | 0.4267           | -0.0171    | 0.0413           |
| Root;k__Bacteria;p__Cyanobacteria   | 0.7123  | 0.0011             | 0.0013           | -0.0002    | 0.0005           |
| Root;k__Bacteria;p__Deferribacteres | 0.4668  | 0.0001             | 0.0000           | 0.0001     | 0.0001           |
| Root;k__Bacteria;p__Firmicutes      | 0.2737  | 0.4978             | 0.4578           | 0.0400     | 0.0337           |
| Root;k__Bacteria;p__Planctomycetes  |         |                    |                  |            |                  |
| Root;k__Bacteria;p__Proteobacteria  | 0.3228  | 0.0790             | 0.1019           | -0.0229    | 0.0215           |
| Root;k__Bacteria;p__TM7             | 0.5745  | 0.0003             | 0.0004           | -0.0001    | 0.0002           |
| Root;k__Bacteria;p__Tenericutes     | 0.9225  | 0.0059             | 0.0063           | -0.0004    | 0.0038           |
| Root;k__Bacteria;p__Verrucomicrobia |         |                    |                  |            |                  |

| Class level                                                 | P value | Mean water-treated | Mean P80-treated | Difference | SE of difference |
|-------------------------------------------------------------|---------|--------------------|------------------|------------|------------------|
| Root;k__Bacteria;p__Actinobacteria;c__Actinobacteria        | 0.7490  | 0.0061             | 0.0055           | 0.0006     | 0.0018           |
| Root;k__Bacteria;p__Actinobacteria;c__Thermoleophilia       |         |                    |                  |            |                  |
| Root;k__Bacteria;p__Bacteroidetes;c__Bacteroidia            | 0.6913  | 0.4096             | 0.4267           | -0.0171    | 0.0413           |
| Root;k__Bacteria;p__Bacteroidetes;c__Flavobacteriia         |         |                    |                  |            |                  |
| Root;k__Bacteria;p__Bacteroidetes;c__Sphingobacteriia       |         |                    |                  |            |                  |
| Root;k__Bacteria;p__Cyanobacteria;c__4C0d-2                 | 0.5673  | 0.0008             | 0.0012           | -0.0003    | 0.0005           |
| Root;k__Bacteria;p__Cyanobacteria;c__Chloroplast            | 0.3562  | 0.0002             | 0.0001           | 0.0001     | 0.0001           |
| Root;k__Bacteria;p__Deferribacteres;c__Deferribacteres      | 0.4668  | 0.0001             | 0.0000           | 0.0001     | 0.0001           |
| Root;k__Bacteria;p__Firmicutes;c__Bacilli                   | 0.5469  | 0.0987             | 0.1125           | -0.0138    | 0.0218           |
| Root;k__Bacteria;p__Firmicutes;c__Clostridia                | 0.4763  | 0.3572             | 0.3139           | 0.0433     | 0.0576           |
| Root;k__Bacteria;p__Firmicutes;c__Erysipelotrichi           | 0.5553  | 0.0419             | 0.0314           | 0.0105     | 0.0169           |
| Root;k__Bacteria;p__Planctomycetes;c__Planctomycetia        |         |                    |                  |            |                  |
| Root;k__Bacteria;p__Proteobacteria;c__Alphaproteobacteria   | 0.2813  | 0.0000             | 0.0003           | -0.0002    | 0.0002           |
| Root;k__Bacteria;p__Proteobacteria;c__Betaproteobacteria    | 0.2562  | 0.0085             | 0.0127           | -0.0042    | 0.0034           |
| Root;k__Bacteria;p__Proteobacteria;c__Deltaproteobacteria   | 0.2690  | 0.0466             | 0.0295           | 0.0170     | 0.0142           |
| Root;k__Bacteria;p__Proteobacteria;c__Epsilonproteobacteria | 0.0784  | 0.0239             | 0.0594           | -0.0355    | 0.0172           |
| Root;k__Bacteria;p__Proteobacteria;c__Gammaproteobacteria   | 0.2924  | 0.0000             | 0.0000           | 0.0000     | 0.0000           |
| Root;k__Bacteria;p__TM7;c__TM7-3                            | 0.5745  | 0.0003             | 0.0004           | -0.0001    | 0.0002           |
| Root;k__Bacteria;p__Tenericutes;c__Mollicutes               | 0.9225  | 0.0059             | 0.0063           | -0.0004    | 0.0038           |
| Root;k__Bacteria;p__Verrucomicrobia;c__Verrucomicrobiae     |         |                    |                  |            |                  |

| Order level                                                                  | P value | Mean water-treated | Mean P80-treated | Difference | SE of difference |
|------------------------------------------------------------------------------|---------|--------------------|------------------|------------|------------------|
| Root;k__Bacteria;p__Actinobacteria;c__Actinobacteria;o__Actinomycetales      |         |                    |                  |            |                  |
| Root;k__Bacteria;p__Actinobacteria;c__Actinobacteria;o__Bifidobacteriales    | 0.7490  | 0.0061             | 0.0055           | 0.0006     | 0.0018           |
| Root;k__Bacteria;p__Actinobacteria;c__Thermoleophilia;o__Solirubrobacterales |         |                    |                  |            |                  |
| Root;k__Bacteria;p__Bacteroidetes;c__Bacteroidia;o__Bacteroidales            | 0.6913  | 0.4096             | 0.4267           | -0.0171    | 0.0413           |
| Root;k__Bacteria;p__Bacteroidetes;c__Flavobacteriia;o__Flavobacteriales      |         |                    |                  |            |                  |
| Root;k__Bacteria;p__Bacteroidetes;c__Sphingobacteriia;o__Sphingobacteriales  |         |                    |                  |            |                  |

|                                                                              |        |        |        |         |        |
|------------------------------------------------------------------------------|--------|--------|--------|---------|--------|
| Root;k_Bacteria;p_Cyanobacteria;c_4C0d-2;o_Y52                               | 0.5673 | 0.0008 | 0.0012 | -0.0003 | 0.0005 |
| Root;k_Bacteria;p_Cyanobacteria;c_Chloroplast;o_Streptophyta                 | 0.3562 | 0.0002 | 0.0001 | 0.0001  | 0.0001 |
| Root;k_Bacteria;p_Deferribacteres;c_Deferribacteres;o_Deferribacterales      | 0.4668 | 0.0001 | 0.0000 | 0.0001  | 0.0001 |
| Root;k_Bacteria;p_Firmicutes;c_Bacilli;o_                                    |        |        |        |         |        |
| Root;k_Bacteria;p_Firmicutes;c_Bacilli;o_Bacillales                          |        |        |        |         |        |
| Root;k_Bacteria;p_Firmicutes;c_Bacilli;o_Lactobacillales                     | 0.5760 | 0.0665 | 0.0580 | 0.0085  | 0.0145 |
| Root;k_Bacteria;p_Firmicutes;c_Bacilli;o_Turicibacterales                    | 0.0730 | 0.0322 | 0.0545 | -0.0223 | 0.0106 |
| Root;k_Bacteria;p_Firmicutes;c_Clostridia;o_                                 | 0.1800 | 0.0248 | 0.0160 | 0.0088  | 0.0059 |
| Root;k_Bacteria;p_Firmicutes;c_Clostridia;o_Clostridiales                    | 0.6065 | 0.3186 | 0.2900 | 0.0286  | 0.0531 |
| Root;k_Bacteria;p_Firmicutes;c_Clostridia;o_Coriobacteriales                 | 0.0534 | 0.0137 | 0.0078 | 0.0059  | 0.0025 |
| Root;k_Bacteria;p_Firmicutes;c_Erysipelotrichi;o_Erysipelotrichales          | 0.5553 | 0.0419 | 0.0314 | 0.0105  | 0.0169 |
| Root;k_Bacteria;p_Planctomycetes;c_Planctomycetia;o_Gemmatales               |        |        |        |         |        |
| Root;k_Bacteria;p_Planctomycetes;c_Planctomycetia;o_Pirellulales             |        |        |        |         |        |
| Root;k_Bacteria;p_Planctomycetes;c_Planctomycetia;o_Planctomycetales         |        |        |        |         |        |
| Root;k_Bacteria;p_Proteobacteria;c_Alphaproteobacteria;o_                    | 0.2924 | 0.0000 | 0.0001 | -0.0001 | 0.0001 |
| Root;k_Bacteria;p_Proteobacteria;c_Alphaproteobacteria;o_RF32                | 0.4071 | 0.0000 | 0.0000 | 0.0000  | 0.0000 |
| Root;k_Bacteria;p_Proteobacteria;c_Alphaproteobacteria;o_Rhizobiales         |        |        |        |         |        |
| Root;k_Bacteria;p_Proteobacteria;c_Alphaproteobacteria;o_Rhodobacterales     |        |        |        |         |        |
| Root;k_Bacteria;p_Proteobacteria;c_Alphaproteobacteria;o_Rickettsiales       | 0.1057 | 0.0000 | 0.0001 | -0.0001 | 0.0001 |
| Root;k_Bacteria;p_Proteobacteria;c_Alphaproteobacteria;o_Sphingomonadales    |        |        |        |         |        |
| Root;k_Bacteria;p_Proteobacteria;c_Betaproteobacteria;o_Burkholderiales      | 0.2562 | 0.0085 | 0.0127 | -0.0042 | 0.0034 |
| Root;k_Bacteria;p_Proteobacteria;c_Betaproteobacteria;o_Methylophilales      |        |        |        |         |        |
| Root;k_Bacteria;p_Proteobacteria;c_Betaproteobacteria;o_Rhodocyclales        |        |        |        |         |        |
| Root;k_Bacteria;p_Proteobacteria;c_Deltaproteobacteria;o_Desulfovibrionales  | 0.2690 | 0.0466 | 0.0295 | 0.0170  | 0.0142 |
| Root;k_Bacteria;p_Proteobacteria;c_Deltaproteobacteria;o_Myxococcales        |        |        |        |         |        |
| Root;k_Bacteria;p_Proteobacteria;c_Deltaproteobacteria;o_Spirobacillales     |        |        |        |         |        |
| Root;k_Bacteria;p_Proteobacteria;c_Epsilonproteobacteria;o_Campylobacterales | 0.0784 | 0.0239 | 0.0594 | -0.0355 | 0.0172 |
| Root;k_Bacteria;p_Proteobacteria;c_Gammaproteobacteria;o_Aeromonadales       |        |        |        |         |        |
| Root;k_Bacteria;p_Proteobacteria;c_Gammaproteobacteria;o_Enterobacteriales   |        |        |        |         |        |
| Root;k_Bacteria;p_Proteobacteria;c_Gammaproteobacteria;o_Pasteurellales      |        |        |        |         |        |
| Root;k_Bacteria;p_Proteobacteria;c_Gammaproteobacteria;o_Pseudomonadales     |        |        |        |         |        |
| Root;k_Bacteria;p_Proteobacteria;c_Gammaproteobacteria;o_Xanthomonadales     | 0.2924 | 0.0000 | 0.0000 | 0.0000  | 0.0000 |
| Root;k_Bacteria;p_TM7;c_TM7-3;o_CW040                                        | 0.5745 | 0.0003 | 0.0004 | -0.0001 | 0.0002 |
| Root;k_Bacteria;p_Tenericutes;c_Mollicutes;o_Acholeplasmatales               |        |        |        |         |        |
| Root;k_Bacteria;p_Tenericutes;c_Mollicutes;o_Anaeroplasmatales               |        |        |        |         |        |
| Root;k_Bacteria;p_Tenericutes;c_Mollicutes;o_Mycoplasmatales                 | 0.9620 | 0.0057 | 0.0055 | 0.0002  | 0.0034 |
| Root;k_Bacteria;p_Tenericutes;c_Mollicutes;o_RF39                            | 0.3411 | 0.0002 | 0.0008 | -0.0005 | 0.0005 |
| Root;k_Bacteria;p_Verrucomicrobia;c_Verrucomicrobiae;o_Verrucomicrobiales    |        |        |        |         |        |

| Family level                                                                            | P value | Mean water-treated | Mean P80-treated | Difference | SE of difference |
|-----------------------------------------------------------------------------------------|---------|--------------------|------------------|------------|------------------|
| Root;k_Bacteria;p_Actinobacteria;c_Actinobacteria;o_Actinomycetales;f_                  |         |                    |                  |            |                  |
| Root;k_Bacteria;p_Actinobacteria;c_Actinobacteria;o_Actinomycetales;f_ACK-M1            |         |                    |                  |            |                  |
| Root;k_Bacteria;p_Actinobacteria;c_Actinobacteria;o_Actinomycetales;f_Brevibacteriaceae |         |                    |                  |            |                  |

|                                                                                                 |               |               |               |                |               |
|-------------------------------------------------------------------------------------------------|---------------|---------------|---------------|----------------|---------------|
| Root;k_Bacteria;p_Actinobacteria;c_Actinobacteria;o_Actinomycetales;f_Corynebacteriaceae        |               |               |               |                |               |
| Root;k_Bacteria;p_Actinobacteria;c_Actinobacteria;o_Actinomycetales;f_Dermabacteraceae          |               |               |               |                |               |
| Root;k_Bacteria;p_Actinobacteria;c_Actinobacteria;o_Actinomycetales;f_Frankiaceae               |               |               |               |                |               |
| Root;k_Bacteria;p_Actinobacteria;c_Actinobacteria;o_Actinomycetales;f_Kineosporiaceae           |               |               |               |                |               |
| Root;k_Bacteria;p_Actinobacteria;c_Actinobacteria;o_Actinomycetales;f_Microbacteriaceae         |               |               |               |                |               |
| Root;k_Bacteria;p_Actinobacteria;c_Actinobacteria;o_Actinomycetales;f_Micrococcaceae            |               |               |               |                |               |
| Root;k_Bacteria;p_Actinobacteria;c_Actinobacteria;o_Actinomycetales;f_Nocardiaceae              |               |               |               |                |               |
| Root;k_Bacteria;p_Actinobacteria;c_Actinobacteria;o_Actinomycetales;f_Promicromonosporaceae     |               |               |               |                |               |
| Root;k_Bacteria;p_Actinobacteria;c_Actinobacteria;o_Actinomycetales;f_Streptomycetaceae         |               |               |               |                |               |
| Root;k_Bacteria;p_Actinobacteria;c_Actinobacteria;o_Bifidobacteriales;f_                        |               |               |               |                |               |
| Root;k_Bacteria;p_Actinobacteria;c_Actinobacteria;o_Bifidobacteriales;f_Bifidobacteriaceae      | 0.7490        | 0.0061        | 0.0055        | 0.0006         | 0.0018        |
| Root;k_Bacteria;p_Actinobacteria;c_Thermoleophilia;o_Solirubrobacterales;f_Solirubrobacteraceae |               |               |               |                |               |
| Root;k_Bacteria;p_Bacteroidetes;c_Bacteroidia;o_Bacteroidales;f_                                | 0.2634        | 0.0004        | 0.0009        | -0.0005        | 0.0004        |
| <b>Root;k_Bacteria;p_Bacteroidetes;c_Bacteroidia;o_Bacteroidales;f_Bacteroidaceae</b>           | <b>0.0235</b> | <b>0.0381</b> | <b>0.0806</b> | <b>-0.0425</b> | <b>0.0147</b> |
| <b>Root;k_Bacteria;p_Bacteroidetes;c_Bacteroidia;o_Bacteroidales;f_Porphyrimonadaceae</b>       | <b>0.0294</b> | <b>0.0040</b> | <b>0.0087</b> | <b>-0.0048</b> | <b>0.0017</b> |
| Root;k_Bacteria;p_Bacteroidetes;c_Bacteroidia;o_Bacteroidales;f_Prevotellaceae                  | 0.3614        | 0.0178        | 0.0271        | -0.0093        | 0.0095        |
| Root;k_Bacteria;p_Bacteroidetes;c_Bacteroidia;o_Bacteroidales;f_Rikenellaceae                   | 0.7938        | 0.0117        | 0.0128        | -0.0011        | 0.0040        |
| Root;k_Bacteria;p_Bacteroidetes;c_Bacteroidia;o_Bacteroidales;f_S24-7                           | 0.2251        | 0.3348        | 0.2939        | 0.0410         | 0.0308        |
| Root;k_Bacteria;p_Bacteroidetes;c_Bacteroidia;o_Bacteroidales;f_[Odoribacteraceae]              | 0.9697        | 0.0028        | 0.0028        | 0.0000         | 0.0008        |
| Root;k_Bacteria;p_Bacteroidetes;c_Flavobacteriia;o_Flavobacteriales;f_Cryomorphaceae            |               |               |               |                |               |
| Root;k_Bacteria;p_Bacteroidetes;c_Flavobacteriia;o_Flavobacteriales;f_Flavobacteriaceae         |               |               |               |                |               |
| Root;k_Bacteria;p_Bacteroidetes;c_Sphingobacteriia;o_Sphingobacteriales;f_                      |               |               |               |                |               |
| Root;k_Bacteria;p_Bacteroidetes;c_Sphingobacteriia;o_Sphingobacteriales;f_Chitinophagaceae      |               |               |               |                |               |
| Root;k_Bacteria;p_Bacteroidetes;c_Sphingobacteriia;o_Sphingobacteriales;f_Flexibacteraceae      |               |               |               |                |               |
| Root;k_Bacteria;p_Cyanobacteria;c_4C0d-2;o_YS2;f_                                               | 0.5673        | 0.0008        | 0.0012        | -0.0003        | 0.0005        |
| Root;k_Bacteria;p_Cyanobacteria;c_Chloroplast;o_Streptophyta;f_                                 | 0.3562        | 0.0002        | 0.0001        | 0.0001         | 0.0001        |
| Root;k_Bacteria;p_Deferribacteres;c_Deferribacteres;o_Deferribacterales;f_Deferribacteraceae    | 0.4668        | 0.0001        | 0.0000        | 0.0001         | 0.0001        |
| Root;k_Bacteria;p_Firmicutes;c_Bacilli;o_;                                                      |               |               |               |                |               |
| Root;k_Bacteria;p_Firmicutes;c_Bacilli;o_Bacillales;f_                                          |               |               |               |                |               |
| Root;k_Bacteria;p_Firmicutes;c_Bacilli;o_Bacillales;f_Alicyclobacillaceae                       |               |               |               |                |               |
| Root;k_Bacteria;p_Firmicutes;c_Bacilli;o_Bacillales;f_Bacillaceae                               |               |               |               |                |               |
| Root;k_Bacteria;p_Firmicutes;c_Bacilli;o_Bacillales;f_Paenibacillaceae                          |               |               |               |                |               |
| Root;k_Bacteria;p_Firmicutes;c_Bacilli;o_Bacillales;f_Planococcaceae                            |               |               |               |                |               |
| Root;k_Bacteria;p_Firmicutes;c_Bacilli;o_Bacillales;f_Staphylococcaceae                         |               |               |               |                |               |
| Root;k_Bacteria;p_Firmicutes;c_Bacilli;o_Bacillales;f_Thermoactinomycetaceae                    |               |               |               |                |               |
| Root;k_Bacteria;p_Firmicutes;c_Bacilli;o_Lactobacillales;f_                                     |               |               |               |                |               |
| Root;k_Bacteria;p_Firmicutes;c_Bacilli;o_Lactobacillales;f_Aerococcaceae                        | 0.4071        | 0.0000        | 0.0000        | 0.0000         | 0.0000        |
| Root;k_Bacteria;p_Firmicutes;c_Bacilli;o_Lactobacillales;f_Carnobacteriaceae                    |               |               |               |                |               |
| Root;k_Bacteria;p_Firmicutes;c_Bacilli;o_Lactobacillales;f_Enterococcaceae                      |               |               |               |                |               |
| Root;k_Bacteria;p_Firmicutes;c_Bacilli;o_Lactobacillales;f_Lactobacillaceae                     | 0.5705        | 0.0664        | 0.0578        | 0.0086         | 0.0145        |
| Root;k_Bacteria;p_Firmicutes;c_Bacilli;o_Lactobacillales;f_Leuconostocaceae                     |               |               |               |                |               |
| Root;k_Bacteria;p_Firmicutes;c_Bacilli;o_Lactobacillales;f_Streptococcaceae                     | 0.2908        | 0.0000        | 0.0002        | -0.0001        | 0.0001        |
| Root;k_Bacteria;p_Firmicutes;c_Bacilli;o_Turicibacterales;f_Turicibacteraceae                   | 0.0730        | 0.0322        | 0.0545        | -0.0223        | 0.0106        |

Chassaing et al, Supplemental Table 1.

|                                                                                                   |                    |               |               |               |               |
|---------------------------------------------------------------------------------------------------|--------------------|---------------|---------------|---------------|---------------|
| Root;k_Bacteria;p_Firmicutes;c_Clostridia;o_ ;f_                                                  | 0.1800             | 0.0248        | 0.0160        | 0.0088        | 0.0059        |
| Root;k_Bacteria;p_Firmicutes;c_Clostridia;o_Clostridiales;f_                                      | 0.1052             | 0.0008        | 0.0004        | 0.0004        | 0.0002        |
| Root;k_Bacteria;p_Firmicutes;c_Clostridia;o_Clostridiales;f_Clostridiaceae                        | 0.6977             | 0.0027        | 0.0023        | 0.0004        | 0.0010        |
| <b>Root;k_Bacteria;p_Firmicutes;c_Clostridia;o_Clostridiales;f_Dehalobacteriaceae</b>             | <b>&lt; 0.0001</b> | <b>0.0029</b> | <b>0.0009</b> | <b>0.0021</b> | <b>0.0003</b> |
| Root;k_Bacteria;p_Firmicutes;c_Clostridia;o_Clostridiales;f_Eubacteriaceae                        |                    |               |               |               |               |
| Root;k_Bacteria;p_Firmicutes;c_Clostridia;o_Clostridiales;f_Lachnospiraceae                       | 0.5228             | 0.2520        | 0.2165        | 0.0355        | 0.0528        |
| Root;k_Bacteria;p_Firmicutes;c_Clostridia;o_Clostridiales;f_Peptococcaceae                        |                    |               |               |               |               |
| Root;k_Bacteria;p_Firmicutes;c_Clostridia;o_Clostridiales;f_Peptostreptococcaceae                 |                    |               |               |               |               |
| Root;k_Bacteria;p_Firmicutes;c_Clostridia;o_Clostridiales;f_Ruminococcaceae                       | 0.4550             | 0.0602        | 0.0700        | -0.0098       | 0.0123        |
| <b>Root;k_Bacteria;p_Firmicutes;c_Clostridia;o_Coriobacteriales;f_</b>                            | <b>0.0253</b>      | <b>0.0095</b> | <b>0.0036</b> | <b>0.0059</b> | <b>0.0021</b> |
| Root;k_Bacteria;p_Firmicutes;c_Clostridia;o_Coriobacteriales;f_Coriobacteriaceae                  | 0.9917             | 0.0042        | 0.0042        | 0.0000        | 0.0009        |
| Root;k_Bacteria;p_Firmicutes;c_Erysipelotrichi;o_Erysipelotrichales;f_Erysipelotrichaceae         | 0.5027             | 0.0418        | 0.0298        | 0.0120        | 0.0170        |
| Root;k_Bacteria;p_Firmicutes;c_Erysipelotrichi;o_Erysipelotrichales;f_[Coprobacillaceae]          | 0.0804             | 0.0001        | 0.0016        | -0.0015       | 0.0008        |
| Root;k_Bacteria;p_Planctomycetes;c_Planctomycetia;o_Gemmatales;f_Gemmataceae                      |                    |               |               |               |               |
| Root;k_Bacteria;p_Planctomycetes;c_Planctomycetia;o_Pirellulales;f_Pirellulaceae                  |                    |               |               |               |               |
| Root;k_Bacteria;p_Planctomycetes;c_Planctomycetia;o_Planctomycetales;f_Planctomycetaceae          |                    |               |               |               |               |
| Root;k_Bacteria;p_Proteobacteria;c_Alphaproteobacteria;o_ ;f_                                     | 0.2924             | 0.0000        | 0.0001        | -0.0001       | 0.0001        |
| Root;k_Bacteria;p_Proteobacteria;c_Alphaproteobacteria;o_RF32;f_                                  | 0.4071             | 0.0000        | 0.0000        | 0.0000        | 0.0000        |
| Root;k_Bacteria;p_Proteobacteria;c_Alphaproteobacteria;o_Rhizobiales;f_Brucellaceae               |                    |               |               |               |               |
| Root;k_Bacteria;p_Proteobacteria;c_Alphaproteobacteria;o_Rhizobiales;f_Hyphomicrobiaceae          |                    |               |               |               |               |
| Root;k_Bacteria;p_Proteobacteria;c_Alphaproteobacteria;o_Rhizobiales;f_Methylobacteriaceae        |                    |               |               |               |               |
| Root;k_Bacteria;p_Proteobacteria;c_Alphaproteobacteria;o_Rhizobiales;f_Rhizobiaceae               |                    |               |               |               |               |
| Root;k_Bacteria;p_Proteobacteria;c_Alphaproteobacteria;o_Rhodobacterales;f_Rhodobacteraceae       |                    |               |               |               |               |
| Root;k_Bacteria;p_Proteobacteria;c_Alphaproteobacteria;o_Rickettsiales;f_mitochondria             | 0.1057             | 0.0000        | 0.0001        | -0.0001       | 0.0001        |
| Root;k_Bacteria;p_Proteobacteria;c_Alphaproteobacteria;o_Sphingomonadales;f_Sphingomonadaceae     |                    |               |               |               |               |
| Root;k_Bacteria;p_Proteobacteria;c_Betaproteobacteria;o_Burkholderiales;f_Alcaligenaceae          | 0.2636             | 0.0085        | 0.0127        | -0.0042       | 0.0034        |
| Root;k_Bacteria;p_Proteobacteria;c_Betaproteobacteria;o_Burkholderiales;f_Burkholderiaceae        |                    |               |               |               |               |
| Root;k_Bacteria;p_Proteobacteria;c_Betaproteobacteria;o_Burkholderiales;f_Comamonadaceae          |                    |               |               |               |               |
| Root;k_Bacteria;p_Proteobacteria;c_Betaproteobacteria;o_Burkholderiales;f_Oxalobacteraceae        | 0.2924             | 0.0000        | 0.0000        | 0.0000        | 0.0000        |
| Root;k_Bacteria;p_Proteobacteria;c_Betaproteobacteria;o_Methylophilales;f_Methylophilaceae        |                    |               |               |               |               |
| Root;k_Bacteria;p_Proteobacteria;c_Betaproteobacteria;o_Rhodocyclales;f_Rhodocyclaceae            |                    |               |               |               |               |
| Root;k_Bacteria;p_Proteobacteria;c_Deltaproteobacteria;o_Desulfovibrionales;f_Desulfovibrionaceae | 0.2690             | 0.0466        | 0.0295        | 0.0170        | 0.0142        |
| Root;k_Bacteria;p_Proteobacteria;c_Deltaproteobacteria;o_Myxococcales;f_                          |                    |               |               |               |               |
| Root;k_Bacteria;p_Proteobacteria;c_Deltaproteobacteria;o_Myxococcales;f_Nannocystaceae            |                    |               |               |               |               |
| Root;k_Bacteria;p_Proteobacteria;c_Deltaproteobacteria;o_Spirobacillales;f_                       |                    |               |               |               |               |
| Root;k_Bacteria;p_Proteobacteria;c_Epsilonproteobacteria;o_Campylobacterales;f_Helicobacteraceae  | 0.0784             | 0.0239        | 0.0594        | -0.0355       | 0.0172        |
| Root;k_Bacteria;p_Proteobacteria;c_Gammaproteobacteria;o_Aeromonadales;f_                         |                    |               |               |               |               |
| Root;k_Bacteria;p_Proteobacteria;c_Gammaproteobacteria;o_Aeromonadales;f_Aeromonadaceae           |                    |               |               |               |               |
| Root;k_Bacteria;p_Proteobacteria;c_Gammaproteobacteria;o_Enterobacteriales;f_Enterobacteriaceae   |                    |               |               |               |               |
| Root;k_Bacteria;p_Proteobacteria;c_Gammaproteobacteria;o_Pasteurellales;f_Pasteurellaceae         |                    |               |               |               |               |
| Root;k_Bacteria;p_Proteobacteria;c_Gammaproteobacteria;o_Pseudomonadales;f_Moraxellaceae          |                    |               |               |               |               |
| Root;k_Bacteria;p_Proteobacteria;c_Gammaproteobacteria;o_Pseudomonadales;f_Pseudomonadaceae       |                    |               |               |               |               |
| Root;k_Bacteria;p_Proteobacteria;c_Gammaproteobacteria;o_Xanthomonadales;f_Xanthomonadaceae       | 0.2924             | 0.0000        | 0.0000        | 0.0000        | 0.0000        |

|                                                                                                      |        |        |        |         |        |
|------------------------------------------------------------------------------------------------------|--------|--------|--------|---------|--------|
| Root;k__Bacteria;p__TM7;c__TM7-3;o__CW040;f__F16                                                     | 0.5745 | 0.0003 | 0.0004 | -0.0001 | 0.0002 |
| Root;k__Bacteria;p__Tenericutes;c__Mollicutes;o__Acholeplasmatales;f__Acholeplasmataceae             |        |        |        |         |        |
| Root;k__Bacteria;p__Tenericutes;c__Mollicutes;o__Anaeroplasmatales;f__Anaeroplasmataceae             |        |        |        |         |        |
| Root;k__Bacteria;p__Tenericutes;c__Mollicutes;o__Mycoplasmatales;f__Mycoplasmataceae                 | 0.9620 | 0.0057 | 0.0055 | 0.0002  | 0.0034 |
| Root;k__Bacteria;p__Tenericutes;c__Mollicutes;o__RF39;f__                                            | 0.3411 | 0.0002 | 0.0008 | -0.0005 | 0.0005 |
| Root;k__Bacteria;p__Verrucomicrobia;c__Verrucomicrobiae;o__Verrucomicrobiales;f__Verrucomicrobiaceae |        |        |        |         |        |

## WT water versus WT P80 - Mucosa Associated Bacteria

| Phyla level                              | P value       | Mean water-treated | Mean P80-treated | Difference     | SE of difference |
|------------------------------------------|---------------|--------------------|------------------|----------------|------------------|
| Root;k_Bacteria;p_Actinobacteria         | 0.9982        | 0.0003             | 0.0003           | 0.0000         | 0.0002           |
| Root;k_Bacteria;p_Bacteroidetes          | 0.8511        | 0.1839             | 0.1654           | 0.0186         | 0.0954           |
| Root;k_Bacteria;p_Cyanobacteria          | 0.2711        | 0.0033             | 0.0082           | -0.0048        | 0.0041           |
| Root;k_Bacteria;p_Deferribacteres        | 0.8835        | 0.0001             | 0.0001           | 0.0000         | 0.0001           |
| Root;k_Bacteria;p_Firmicutes             | 0.4473        | 0.4676             | 0.3513           | 0.1164         | 0.1446           |
| Root;k_Bacteria;p_Planctomycetes         |               |                    |                  |                |                  |
| Root;k_Bacteria;p_Proteobacteria         | 0.5203        | 0.3393             | 0.4621           | -0.1228        | 0.1815           |
| Root;k_Bacteria;p_TM7                    | 0.2089        | 0.0001             | 0.0000           | 0.0001         | 0.0001           |
| Root;k_Bacteria;p_Tenericutes            | 0.1034        | 0.0053             | 0.0123           | -0.0070        | 0.0037           |
| <b>Root;k_Bacteria;p_Verrucomicrobia</b> | <b>0.0223</b> | <b>0.0000</b>      | <b>0.0005</b>    | <b>-0.0005</b> | <b>0.0002</b>    |

| Class level                                              | P value | Mean water-treated | Mean P80-treated | Difference | SE of difference |
|----------------------------------------------------------|---------|--------------------|------------------|------------|------------------|
| Root;k_Bacteria;p_Actinobacteria;c_Actinobacteria        | 0.6027  | 0.0002             | 0.0003           | -0.0001    | 0.0002           |
| Root;k_Bacteria;p_Actinobacteria;c_Thermoleophilia       |         |                    |                  |            |                  |
| Root;k_Bacteria;p_Bacteroidetes;c_Bacteroidia            | 0.8953  | 0.1090             | 0.1185           | -0.0095    | 0.0697           |
| Root;k_Bacteria;p_Bacteroidetes;c_Flavobacteriia         | 0.2924  | 0.0000             | 0.0002           | -0.0002    | 0.0001           |
| Root;k_Bacteria;p_Bacteroidetes;c_Sphingobacteriia       | 0.2924  | 0.0000             | 0.0000           | 0.0000     | 0.0000           |
| Root;k_Bacteria;p_Cyanobacteria;c_4C0d-2                 | 0.3873  | 0.0022             | 0.0061           | -0.0040    | 0.0043           |
| Root;k_Bacteria;p_Cyanobacteria;c_Chloroplast            |         |                    |                  |            |                  |
| Root;k_Bacteria;p_Deferribacteres;c_Deferribacteres      | 0.7569  | 0.0004             | 0.0006           | -0.0002    | 0.0005           |
| Root;k_Bacteria;p_Firmicutes;c_Bacilli                   | 0.2362  | 0.0165             | 0.0047           | 0.0118     | 0.0091           |
| Root;k_Bacteria;p_Firmicutes;c_Clostridia                | 0.2478  | 0.4433             | 0.2690           | 0.1743     | 0.1383           |
| Root;k_Bacteria;p_Firmicutes;c_Erysipelotrichi           | 0.2790  | 0.0012             | 0.0033           | -0.0021    | 0.0018           |
| Root;k_Bacteria;p_Planctomycetes;c_Planctomycetia        |         |                    |                  |            |                  |
| Root;k_Bacteria;p_Proteobacteria;c_Alphaproteobacteria   | 0.3056  | 0.0008             | 0.0003           | 0.0005     | 0.0005           |
| Root;k_Bacteria;p_Proteobacteria;c_Betaproteobacteria    | 0.1884  | 0.0010             | 0.0064           | -0.0054    | 0.0037           |
| Root;k_Bacteria;p_Proteobacteria;c_Deltaproteobacteria   | 0.6747  | 0.0152             | 0.0194           | -0.0042    | 0.0096           |
| Root;k_Bacteria;p_Proteobacteria;c_Epsilonproteobacteria | 0.3615  | 0.4035             | 0.5601           | -0.1567    | 0.1605           |
| Root;k_Bacteria;p_Proteobacteria;c_Gammaproteobacteria   | 0.1766  | 0.0000             | 0.0003           | -0.0002    | 0.0001           |
| Root;k_Bacteria;p_TM7;c_TM7-3                            | 0.8599  | 0.0001             | 0.0001           | 0.0000     | 0.0001           |
| Root;k_Bacteria;p_Tenericutes;c_Mollicutes               | 0.3811  | 0.0068             | 0.0102           | -0.0035    | 0.0037           |
| Root;k_Bacteria;p_Verrucomicrobia;c_Verrucomicrobiae     | 0.0607  | 0.0000             | 0.0006           | -0.0006    | 0.0003           |

| Order level                                                              | P value | Mean water-treated | Mean P80-treated | Difference | SE of difference |
|--------------------------------------------------------------------------|---------|--------------------|------------------|------------|------------------|
| Root;k_Bacteria;p_Actinobacteria;c_Actinobacteria;o_Actinomycetales      | 0.0906  | 0.0000             | 0.0001           | -0.0001    | 0.0001           |
| Root;k_Bacteria;p_Actinobacteria;c_Actinobacteria;o_Bifidobacteriales    | 0.9105  | 0.0002             | 0.0002           | 0.0000     | 0.0002           |
| Root;k_Bacteria;p_Actinobacteria;c_Thermoleophilia;o_Solirubrobacterales |         |                    |                  |            |                  |
| Root;k_Bacteria;p_Bacteroidetes;c_Bacteroidia;o_Bacteroidales            | 0.8953  | 0.1090             | 0.1185           | -0.0095    | 0.0697           |
| Root;k_Bacteria;p_Bacteroidetes;c_Flavobacteriia;o_Flavobacteriales      | 0.2924  | 0.0000             | 0.0002           | -0.0002    | 0.0001           |
| Root;k_Bacteria;p_Bacteroidetes;c_Sphingobacteriia;o_Sphingobacteriales  | 0.2924  | 0.0000             | 0.0000           | 0.0000     | 0.0000           |



|                                                                              |               |               |               |               |               |
|------------------------------------------------------------------------------|---------------|---------------|---------------|---------------|---------------|
| Root;k Bacteria;p Cyanobacteria;c 4C0d-2;o YS2                               | 0.3873        | 0.0022        | 0.0061        | -0.0040       | 0.0043        |
| Root;k Bacteria;p Cyanobacteria;c Chloroplast;o Streptophyta                 |               |               |               |               |               |
| Root;k Bacteria;p Deferribacteres;c Deferribacteres;o Deferribacterales      | 0.7569        | 0.0004        | 0.0006        | -0.0002       | 0.0005        |
| Root;k Bacteria;p Firmicutes;c Bacilli;o                                     |               |               |               |               |               |
| Root;k Bacteria;p Firmicutes;c Bacilli;o Bacillales                          |               |               |               |               |               |
| Root;k Bacteria;p Firmicutes;c Bacilli;o Lactobacillales                     | 0.2392        | 0.0077        | 0.0014        | 0.0063        | 0.0049        |
| Root;k Bacteria;p Firmicutes;c Bacilli;o Turicibacterales                    | 0.2866        | 0.0087        | 0.0033        | 0.0055        | 0.0047        |
| Root;k Bacteria;p Firmicutes;c Clostridia;o                                  | 0.3219        | 0.0151        | 0.0102        | 0.0049        | 0.0046        |
| Root;k Bacteria;p Firmicutes;c Clostridia;o Clostridiales                    | 0.2581        | 0.4207        | 0.2554        | 0.1652        | 0.1342        |
| <b>Root;k Bacteria;p Firmicutes;c Clostridia;o Coriobacteriales</b>          | <b>0.0438</b> | <b>0.0075</b> | <b>0.0034</b> | <b>0.0042</b> | <b>0.0017</b> |
| Root;k Bacteria;p Firmicutes;c Erysipelotrichi;o Erysipelotrichales          | 0.2790        | 0.0012        | 0.0033        | -0.0021       | 0.0018        |
| Root;k Bacteria;p Planctomycetes;c Planctomycetia;o Gemmatales               |               |               |               |               |               |
| Root;k Bacteria;p Planctomycetes;c Planctomycetia;o Pirellulales             |               |               |               |               |               |
| Root;k Bacteria;p Planctomycetes;c Planctomycetia;o Planctomycetales         |               |               |               |               |               |
| Root;k Bacteria;p Proteobacteria;c Alphaproteobacteria;o                     | 0.1263        | 0.0002        | 0.0000        | 0.0002        | 0.0001        |
| Root;k Bacteria;p Proteobacteria;c Alphaproteobacteria;o RF32                | 0.4115        | 0.0006        | 0.0002        | 0.0003        | 0.0004        |
| Root;k Bacteria;p Proteobacteria;c Alphaproteobacteria;o Rhizobiales         |               |               |               |               |               |
| Root;k Bacteria;p Proteobacteria;c Alphaproteobacteria;o Rhodobacterales     |               |               |               |               |               |
| Root;k Bacteria;p Proteobacteria;c Alphaproteobacteria;o Rickettsiales       |               |               |               |               |               |
| Root;k Bacteria;p Proteobacteria;c Alphaproteobacteria;o Sphingomonadales    |               |               |               |               |               |
| Root;k Bacteria;p Proteobacteria;c Betaproteobacteria;o Burkholderiales      | 0.1844        | 0.0010        | 0.0064        | -0.0055       | 0.0037        |
| Root;k Bacteria;p Proteobacteria;c Betaproteobacteria;o Methylophilales      |               |               |               |               |               |
| Root;k Bacteria;p Proteobacteria;c Betaproteobacteria;o Rhodocyclales        | 0.4071        | 0.0001        | 0.0000        | 0.0001        | 0.0001        |
| Root;k Bacteria;p Proteobacteria;c Deltaproteobacteria;o Desulfovibrionales  | 0.6747        | 0.0152        | 0.0194        | -0.0042       | 0.0096        |
| Root;k Bacteria;p Proteobacteria;c Deltaproteobacteria;o Myxococcales        |               |               |               |               |               |
| Root;k Bacteria;p Proteobacteria;c Deltaproteobacteria;o Spirobacillales     |               |               |               |               |               |
| Root;k Bacteria;p Proteobacteria;c Epsilonproteobacteria;o Campylobacterales | 0.3615        | 0.4035        | 0.5601        | -0.1567       | 0.1605        |
| Root;k Bacteria;p Proteobacteria;c Gammaproteobacteria;o Aeromonadales       |               |               |               |               |               |
| Root;k Bacteria;p Proteobacteria;c Gammaproteobacteria;o Enterobacteriales   | 0.2924        | 0.0000        | 0.0002        | -0.0002       | 0.0001        |
| Root;k Bacteria;p Proteobacteria;c Gammaproteobacteria;o Pasteurellales      | 0.2924        | 0.0000        | 0.0000        | 0.0000        | 0.0000        |
| Root;k Bacteria;p Proteobacteria;c Gammaproteobacteria;o Pseudomonadales     | 0.8833        | 0.0000        | 0.0000        | 0.0000        | 0.0001        |
| Root;k Bacteria;p Proteobacteria;c Gammaproteobacteria;o Xanthomonadales     |               |               |               |               |               |
| Root;k Bacteria;p TM7;c TM7-3;o CW040                                        | 0.8599        | 0.0001        | 0.0001        | 0.0000        | 0.0001        |
| Root;k Bacteria;p Tenericutes;c Mollicutes;o Achleplasmatales                |               |               |               |               |               |
| Root;k Bacteria;p Tenericutes;c Mollicutes;o Anaeroplasmatales               |               |               |               |               |               |
| Root;k Bacteria;p Tenericutes;c Mollicutes;o Mycoplasmatales                 | 0.3591        | 0.0065        | 0.0101        | -0.0036       | 0.0037        |
| Root;k Bacteria;p Tenericutes;c Mollicutes;o RF39                            | 0.5803        | 0.0003        | 0.0002        | 0.0002        | 0.0003        |
| Root;k Bacteria;p Verrucomicrobia;c Verrucomicrobiae;o Verrucomicrobiales    | 0.0607        | 0.0000        | 0.0006        | -0.0006       | 0.0003        |

| Family level                                                                            | P value | Mean water-treated | Mean P80-treated | Difference | SE of difference |
|-----------------------------------------------------------------------------------------|---------|--------------------|------------------|------------|------------------|
| Root;k Bacteria;p Actinobacteria;c Actinobacteria;o Actinomycetales;f                   |         |                    |                  |            |                  |
| Root;k Bacteria;p Actinobacteria;c Actinobacteria;o Actinomycetales;f ACK-M1            | 0.2924  | 0.0000             | 0.0000           | 0.0000     | 0.0000           |
| Root;k Bacteria;p Actinobacteria;c Actinobacteria;o Actinomycetales;f Brevibacteriaceae | 0.2924  | 0.0000             | 0.0001           | -0.0001    | 0.0000           |

|                                                                                                 |        |        |        |         |        |
|-------------------------------------------------------------------------------------------------|--------|--------|--------|---------|--------|
| Root;k_Bacteria;p_Actinobacteria;c_Actinobacteria;o_Actinomycetales;f_Corynebacteriaceae        |        |        |        |         |        |
| Root;k_Bacteria;p_Actinobacteria;c_Actinobacteria;o_Actinomycetales;f_Dermabacteraceae          |        |        |        |         |        |
| Root;k_Bacteria;p_Actinobacteria;c_Actinobacteria;o_Actinomycetales;f_Frankiaceae               |        |        |        |         |        |
| Root;k_Bacteria;p_Actinobacteria;c_Actinobacteria;o_Actinomycetales;f_Kineosporiaceae           |        |        |        |         |        |
| Root;k_Bacteria;p_Actinobacteria;c_Actinobacteria;o_Actinomycetales;f_Microbacteriaceae         |        |        |        |         |        |
| Root;k_Bacteria;p_Actinobacteria;c_Actinobacteria;o_Actinomycetales;f_Micrococcaceae            |        |        |        |         |        |
| Root;k_Bacteria;p_Actinobacteria;c_Actinobacteria;o_Actinomycetales;f_Nocardiaceae              |        |        |        |         |        |
| Root;k_Bacteria;p_Actinobacteria;c_Actinobacteria;o_Actinomycetales;f_Promicromonosporaceae     |        |        |        |         |        |
| Root;k_Bacteria;p_Actinobacteria;c_Actinobacteria;o_Actinomycetales;f_Streptomycetaceae         |        |        |        |         |        |
| Root;k_Bacteria;p_Actinobacteria;c_Actinobacteria;o_Bifidobacteriales;f                         |        |        |        |         |        |
| Root;k_Bacteria;p_Actinobacteria;c_Actinobacteria;o_Bifidobacteriales;f_Bifidobacteriaceae      | 0.9105 | 0.0002 | 0.0002 | 0.0000  | 0.0002 |
| Root;k_Bacteria;p_Actinobacteria;c_Thermoleophilia;o_Solirubrobacterales;f_Solirubrobacteraceae |        |        |        |         |        |
| Root;k_Bacteria;p_Bacteroidetes;c_Bacteroidia;o_Bacteroidales;f                                 | 0.5369 | 0.0017 | 0.0009 | 0.0008  | 0.0013 |
| Root;k_Bacteria;p_Bacteroidetes;c_Bacteroidia;o_Bacteroidales;f_Bacteroidaceae                  | 0.4224 | 0.0157 | 0.0102 | 0.0056  | 0.0065 |
| Root;k_Bacteria;p_Bacteroidetes;c_Bacteroidia;o_Bacteroidales;f_Porphyrimonadaceae              | 0.7182 | 0.0042 | 0.0032 | 0.0010  | 0.0027 |
| Root;k_Bacteria;p_Bacteroidetes;c_Bacteroidia;o_Bacteroidales;f_Prevotellaceae                  | 0.8783 | 0.0036 | 0.0039 | -0.0003 | 0.0022 |
| Root;k_Bacteria;p_Bacteroidetes;c_Bacteroidia;o_Bacteroidales;f_Rikenellaceae                   | 0.8238 | 0.0152 | 0.0128 | 0.0023  | 0.0101 |
| Root;k_Bacteria;p_Bacteroidetes;c_Bacteroidia;o_Bacteroidales;f_S24-7                           | 0.5875 | 0.0592 | 0.0851 | -0.0259 | 0.0455 |
| Root;k_Bacteria;p_Bacteroidetes;c_Bacteroidia;o_Bacteroidales;f_[Odoribacteraceae]              | 0.1555 | 0.0093 | 0.0024 | 0.0070  | 0.0044 |
| Root;k_Bacteria;p_Bacteroidetes;c_Flavobacteriia;o_Flavobacteriales;f_Cryomorphaceae            | 0.2924 | 0.0000 | 0.0001 | -0.0001 | 0.0001 |
| Root;k_Bacteria;p_Bacteroidetes;c_Flavobacteriia;o_Flavobacteriales;f_Flavobacteriaceae         | 0.2924 | 0.0000 | 0.0001 | -0.0001 | 0.0001 |
| Root;k_Bacteria;p_Bacteroidetes;c_Sphingobacteriia;o_Sphingobacteriales;f                       |        |        |        |         |        |
| Root;k_Bacteria;p_Bacteroidetes;c_Sphingobacteriia;o_Sphingobacteriales;f_Chitinophagaceae      |        |        |        |         |        |
| Root;k_Bacteria;p_Bacteroidetes;c_Sphingobacteriia;o_Sphingobacteriales;f_Flexibacteraceae      | 0.2924 | 0.0000 | 0.0000 | 0.0000  | 0.0000 |
| Root;k_Bacteria;p_Cyanobacteria;c_4C0d-2;o_YS2;f                                                | 0.3873 | 0.0022 | 0.0061 | -0.0040 | 0.0043 |
| Root;k_Bacteria;p_Cyanobacteria;c_Chloroplast;o_Streptophyta;f                                  |        |        |        |         |        |
| Root;k_Bacteria;p_Deferribacteres;c_Deferribacteres;o_Deferribacterales;f_Deferribacteraceae    | 0.7569 | 0.0004 | 0.0006 | -0.0002 | 0.0005 |
| Root;k_Bacteria;p_Firmicutes;c_Bacilli;o_f                                                      |        |        |        |         |        |
| Root;k_Bacteria;p_Firmicutes;c_Bacilli;o_Bacillales;f                                           |        |        |        |         |        |
| Root;k_Bacteria;p_Firmicutes;c_Bacilli;o_Bacillales;f_Alicyclobacillaceae                       |        |        |        |         |        |
| Root;k_Bacteria;p_Firmicutes;c_Bacilli;o_Bacillales;f_Bacillaceae                               |        |        |        |         |        |
| Root;k_Bacteria;p_Firmicutes;c_Bacilli;o_Bacillales;f_Paenibacillaceae                          |        |        |        |         |        |
| Root;k_Bacteria;p_Firmicutes;c_Bacilli;o_Bacillales;f_Planococcaceae                            |        |        |        |         |        |
| Root;k_Bacteria;p_Firmicutes;c_Bacilli;o_Bacillales;f_Staphylococcaceae                         |        |        |        |         |        |
| Root;k_Bacteria;p_Firmicutes;c_Bacilli;o_Bacillales;f_Thermoactinomycetaceae                    |        |        |        |         |        |
| Root;k_Bacteria;p_Firmicutes;c_Bacilli;o_Lactobacillales;f                                      |        |        |        |         |        |
| Root;k_Bacteria;p_Firmicutes;c_Bacilli;o_Lactobacillales;f_Aerococcaceae                        |        |        |        |         |        |
| Root;k_Bacteria;p_Firmicutes;c_Bacilli;o_Lactobacillales;f_Carnobacteriaceae                    |        |        |        |         |        |
| Root;k_Bacteria;p_Firmicutes;c_Bacilli;o_Lactobacillales;f_Enterococcaceae                      |        |        |        |         |        |
| Root;k_Bacteria;p_Firmicutes;c_Bacilli;o_Lactobacillales;f_Lactobacillaceae                     | 0.2380 | 0.0077 | 0.0014 | 0.0063  | 0.0049 |
| Root;k_Bacteria;p_Firmicutes;c_Bacilli;o_Lactobacillales;f_Leuconostocaceae                     |        |        |        |         |        |
| Root;k_Bacteria;p_Firmicutes;c_Bacilli;o_Lactobacillales;f_Streptococcaceae                     | 0.4071 | 0.0000 | 0.0000 | 0.0000  | 0.0000 |
| Root;k_Bacteria;p_Firmicutes;c_Bacilli;o_Turicibacterales;f_Turicibacteraceae                   | 0.2866 | 0.0087 | 0.0033 | 0.0055  | 0.0047 |

Chassaing et al, Supplemental Table 1.

|                                                                                                   |        |        |        |         |        |
|---------------------------------------------------------------------------------------------------|--------|--------|--------|---------|--------|
| Root;k_Bacteria;p_Firmicutes;c_Clostridia;o_;f                                                    | 0.3219 | 0.0151 | 0.0102 | 0.0049  | 0.0046 |
| Root;k_Bacteria;p_Firmicutes;c_Clostridia;o_Clostridiales;f                                       | 0.4042 | 0.0062 | 0.0027 | 0.0035  | 0.0040 |
| Root;k_Bacteria;p_Firmicutes;c_Clostridia;o_Clostridiales;f_Clostridiaceae                        | 0.9783 | 0.0016 | 0.0017 | 0.0000  | 0.0008 |
| Root;k_Bacteria;p_Firmicutes;c_Clostridia;o_Clostridiales;f_Dehalobacteriaceae                    | 0.9052 | 0.0014 | 0.0013 | 0.0001  | 0.0007 |
| Root;k_Bacteria;p_Firmicutes;c_Clostridia;o_Clostridiales;f_Eubacteriaceae                        |        |        |        |         |        |
| Root;k_Bacteria;p_Firmicutes;c_Clostridia;o_Clostridiales;f_Lachnospiraceae                       | 0.1867 | 0.2963 | 0.1615 | 0.1348  | 0.0921 |
| Root;k_Bacteria;p_Firmicutes;c_Clostridia;o_Clostridiales;f_Peptococcaceae                        |        |        |        |         |        |
| Root;k_Bacteria;p_Firmicutes;c_Clostridia;o_Clostridiales;f_Peptostreptococcaceae                 | 0.4071 | 0.0000 | 0.0000 | 0.0000  | 0.0000 |
| Root;k_Bacteria;p_Firmicutes;c_Clostridia;o_Clostridiales;f_Ruminococcaceae                       | 0.5384 | 0.1150 | 0.0883 | 0.0268  | 0.0414 |
| Root;k_Bacteria;p_Firmicutes;c_Clostridia;o_Coriobacteriales;f                                    | 0.0530 | 0.0071 | 0.0031 | 0.0040  | 0.0017 |
| Root;k_Bacteria;p_Firmicutes;c_Clostridia;o_Coriobacteriales;f_Coriobacteriaceae                  | 0.6290 | 0.0004 | 0.0003 | 0.0001  | 0.0003 |
| Root;k_Bacteria;p_Firmicutes;c_Erysipelotrichi;o_Erysipelotrichales;f_Erysipelotrichaceae         | 0.2984 | 0.0012 | 0.0031 | -0.0019 | 0.0017 |
| Root;k_Bacteria;p_Firmicutes;c_Erysipelotrichi;o_Erysipelotrichales;f_[Coproba]cillaceae]         | 0.2342 | 0.0000 | 0.0002 | -0.0002 | 0.0001 |
| Root;k_Bacteria;p_Planctomycetes;c_Planctomycetia;o_Gemmatales;f_Gemmataceae                      |        |        |        |         |        |
| Root;k_Bacteria;p_Planctomycetes;c_Planctomycetia;o_Pirellulales;f_Pirellulaceae                  |        |        |        |         |        |
| Root;k_Bacteria;p_Planctomycetes;c_Planctomycetia;o_Planctomycetales;f_Planctomycetaceae          |        |        |        |         |        |
| Root;k_Bacteria;p_Proteobacteria;c_Alphaproteobacteria;o_;f                                       | 0.1263 | 0.0002 | 0.0000 | 0.0002  | 0.0001 |
| Root;k_Bacteria;p_Proteobacteria;c_Alphaproteobacteria;o_RF32;f                                   | 0.4115 | 0.0006 | 0.0002 | 0.0003  | 0.0004 |
| Root;k_Bacteria;p_Proteobacteria;c_Alphaproteobacteria;o_Rhizobiales;f_Brucellaceae               |        |        |        |         |        |
| Root;k_Bacteria;p_Proteobacteria;c_Alphaproteobacteria;o_Rhizobiales;f_Hyphomicrobiaceae          |        |        |        |         |        |
| Root;k_Bacteria;p_Proteobacteria;c_Alphaproteobacteria;o_Rhizobiales;f_Methylobacteriaceae        |        |        |        |         |        |
| Root;k_Bacteria;p_Proteobacteria;c_Alphaproteobacteria;o_Rhizobiales;f_Rhizobiaceae               |        |        |        |         |        |
| Root;k_Bacteria;p_Proteobacteria;c_Alphaproteobacteria;o_Rhodobacterales;f_Rhodobacteraceae       |        |        |        |         |        |
| Root;k_Bacteria;p_Proteobacteria;c_Alphaproteobacteria;o_Rickettsiales;f_mitochondria             |        |        |        |         |        |
| Root;k_Bacteria;p_Proteobacteria;c_Alphaproteobacteria;o_Sphingomonadales;f_Sphingomonadaceae     |        |        |        |         |        |
| Root;k_Bacteria;p_Proteobacteria;c_Betaproteobacteria;o_Burkholderiales;f_Alcaligenaceae          | 0.1897 | 0.0010 | 0.0064 | -0.0054 | 0.0037 |
| Root;k_Bacteria;p_Proteobacteria;c_Betaproteobacteria;o_Burkholderiales;f_Burkholderiaceae        |        |        |        |         |        |
| Root;k_Bacteria;p_Proteobacteria;c_Betaproteobacteria;o_Burkholderiales;f_Comamonadaceae          |        |        |        |         |        |
| Root;k_Bacteria;p_Proteobacteria;c_Betaproteobacteria;o_Burkholderiales;f_Oxalobacteraceae        | 0.2924 | 0.0000 | 0.0000 | 0.0000  | 0.0000 |
| Root;k_Bacteria;p_Proteobacteria;c_Betaproteobacteria;o_Methylophilales;f_Methylophilaceae        |        |        |        |         |        |
| Root;k_Bacteria;p_Proteobacteria;c_Betaproteobacteria;o_Rhodocyclales;f_Rhodocyclaceae            | 0.4071 | 0.0001 | 0.0000 | 0.0001  | 0.0001 |
| Root;k_Bacteria;p_Proteobacteria;c_Deltaproteobacteria;o_Desulfovibrionales;f_Desulfovibrionaceae | 0.6747 | 0.0152 | 0.0194 | -0.0042 | 0.0096 |
| Root;k_Bacteria;p_Proteobacteria;c_Deltaproteobacteria;o_Myxococcales;f                           |        |        |        |         |        |
| Root;k_Bacteria;p_Proteobacteria;c_Deltaproteobacteria;o_Myxococcales;f_Nannocystaceae            |        |        |        |         |        |
| Root;k_Bacteria;p_Proteobacteria;c_Deltaproteobacteria;o_Spiroba]cillales;f                       |        |        |        |         |        |
| Root;k_Bacteria;p_Proteobacteria;c_Epsilonproteobacteria;o_Campylobacterales;f_Helicobacteraceae  | 0.3615 | 0.4035 | 0.5601 | -0.1567 | 0.1605 |
| Root;k_Bacteria;p_Proteobacteria;c_Gammaproteobacteria;o_Aeromonadales;f                          |        |        |        |         |        |
| Root;k_Bacteria;p_Proteobacteria;c_Gammaproteobacteria;o_Aeromonadales;f_Aeromonadaceae           |        |        |        |         |        |
| Root;k_Bacteria;p_Proteobacteria;c_Gammaproteobacteria;o_Enterobacteriales;f_Enterobacteriaceae   | 0.2924 | 0.0000 | 0.0002 | -0.0002 | 0.0001 |
| Root;k_Bacteria;p_Proteobacteria;c_Gammaproteobacteria;o_Pasteurellales;f_Pasteurellaceae         | 0.2924 | 0.0000 | 0.0000 | 0.0000  | 0.0000 |
| Root;k_Bacteria;p_Proteobacteria;c_Gammaproteobacteria;o_Pseudomonadales;f_Moraxellaceae          | 0.8833 | 0.0000 | 0.0000 | 0.0000  | 0.0001 |
| Root;k_Bacteria;p_Proteobacteria;c_Gammaproteobacteria;o_Pseudomonadales;f_Pseudomonadaceae       |        |        |        |         |        |
| Root;k_Bacteria;p_Proteobacteria;c_Gammaproteobacteria;o_Xanthomonadales;f_Xanthomonadaceae       |        |        |        |         |        |

Chassaing et al, Supplemental Table 1.

|                                                                                                 |        |        |        |         |        |
|-------------------------------------------------------------------------------------------------|--------|--------|--------|---------|--------|
| Root;k_Bacteria;p_TM7;c_TM7-3;o_CW040;f_F16                                                     | 0.8599 | 0.0001 | 0.0001 | 0.0000  | 0.0001 |
| Root;k_Bacteria;p_Tenericutes;c_Mollicutes;o_Acholeplasmatales;f_Acholeplasmataceae             |        |        |        |         |        |
| Root;k_Bacteria;p_Tenericutes;c_Mollicutes;o_Anaeroplasmatales;f_Anaeroplasmataceae             |        |        |        |         |        |
| Root;k_Bacteria;p_Tenericutes;c_Mollicutes;o_Mycoplasmatales;f_Mycoplasmataceae                 | 0.3591 | 0.0065 | 0.0101 | -0.0036 | 0.0037 |
| Root;k_Bacteria;p_Tenericutes;c_Mollicutes;o_RF39;f__                                           | 0.5803 | 0.0003 | 0.0002 | 0.0002  | 0.0003 |
| Root;k_Bacteria;p_Verrucomicrobia;c_Verrucomicrobiae;o_Verrucomicrobiales;f_Verrucomicrobiaceae | 0.0607 | 0.0000 | 0.0006 | -0.0006 | 0.0003 |

## IL10<sup>-/-</sup> water versus IL10<sup>-/-</sup> CMC - Feces

| Phyla level                              | P value       | Mean water-treated | Mean CMC-treated | Difference     | SE of difference |
|------------------------------------------|---------------|--------------------|------------------|----------------|------------------|
| <b>Root;k_Bacteria;p_Actinobacteria</b>  | <b>0.0021</b> | <b>0.0005</b>      | <b>0.0218</b>    | <b>-0.0212</b> | <b>0.0054</b>    |
| Root;k_Bacteria;p_Bacteroidetes          | 0.4405        | 0.4231             | 0.3518           | 0.0713         | 0.0894           |
| Root;k_Bacteria;p_Cyanobacteria          | 0.1558        | 0.0006             | 0.0030           | -0.0024        | 0.0016           |
| Root;k_Bacteria;p_Deferribacteres        |               |                    |                  |                |                  |
| <b>Root;k_Bacteria;p_Firmicutes</b>      | <b>0.0246</b> | <b>0.5171</b>      | <b>0.3075</b>    | <b>0.2096</b>  | <b>0.0816</b>    |
| Root;k_Bacteria;p_Planctomycetes         |               |                    |                  |                |                  |
| Root;k_Bacteria;p_Proteobacteria         | 0.6014        | 0.0491             | 0.0559           | -0.0068        | 0.0128           |
| Root;k_Bacteria;p_TM7                    | 0.4273        | 0.0001             | 0.0000           | 0.0001         | 0.0001           |
| Root;k_Bacteria;p_Tenericutes            | 0.1097        | 0.0025             | 0.0005           | 0.0020         | 0.0012           |
| <b>Root;k_Bacteria;p_Verrucomicrobia</b> | <b>0.0001</b> | <b>0.0071</b>      | <b>0.2596</b>    | <b>-0.2525</b> | <b>0.0458</b>    |

| Class level                                              | P value | Mean water-treated | Mean CMC-treated | Difference | SE of difference |
|----------------------------------------------------------|---------|--------------------|------------------|------------|------------------|
| Root;k_Bacteria;p_Actinobacteria;c_Actinobacteria        | 0.1367  | 0.0018             | 0.0130           | -0.0113    | 0.0071           |
| Root;k_Bacteria;p_Actinobacteria;c_Thermoleophilia       |         |                    |                  |            |                  |
| Root;k_Bacteria;p_Bacteroidetes;c_Bacteroidia            | 0.9558  | 0.3847             | 0.3806           | 0.0042     | 0.0737           |
| Root;k_Bacteria;p_Bacteroidetes;c_Flavobacteriia         |         |                    |                  |            |                  |
| Root;k_Bacteria;p_Bacteroidetes;c_Sphingobacteriia       |         |                    |                  |            |                  |
| Root;k_Bacteria;p_Cyanobacteria;c_4C0d-2                 | 0.5611  | 0.0002             | 0.0001           | 0.0001     | 0.0002           |
| Root;k_Bacteria;p_Cyanobacteria;c_Chloroplast            | 0.9747  | 0.0002             | 0.0002           | 0.0000     | 0.0001           |
| Root;k_Bacteria;p_Deferribacteres;c_Deferribacteres      |         |                    |                  |            |                  |
| Root;k_Bacteria;p_Firmicutes;c_Bacilli                   | 0.5626  | 0.1613             | 0.1987           | -0.0374    | 0.0628           |
| Root;k_Bacteria;p_Firmicutes;c_Clostridia                | 0.0900  | 0.2954             | 0.1589           | 0.1364     | 0.0740           |
| Root;k_Bacteria;p_Firmicutes;c_Erysipelotrichi           | 0.2327  | 0.0303             | 0.0522           | -0.0219    | 0.0174           |
| Root;k_Bacteria;p_Planctomycetes;c_Planctomycetia        |         |                    |                  |            |                  |
| Root;k_Bacteria;p_Proteobacteria;c_Alphaproteobacteria   | 0.5775  | 0.0002             | 0.0003           | -0.0001    | 0.0001           |
| Root;k_Bacteria;p_Proteobacteria;c_Betaproteobacteria    | 0.3830  | 0.0179             | 0.0284           | -0.0105    | 0.0115           |
| Root;k_Bacteria;p_Proteobacteria;c_Deltaproteobacteria   | 0.6530  | 0.0286             | 0.0210           | 0.0076     | 0.0165           |
| Root;k_Bacteria;p_Proteobacteria;c_Epsilonproteobacteria | 0.1866  | 0.0007             | 0.0025           | -0.0017    | 0.0012           |
| Root;k_Bacteria;p_Proteobacteria;c_Gammaproteobacteria   | 0.5663  | 0.0018             | 0.0001           | 0.0018     | 0.0030           |
| Root;k_Bacteria;p_TM7;c_TM7-3                            | 0.4273  | 0.0001             | 0.0000           | 0.0001     | 0.0001           |
| Root;k_Bacteria;p_Tenericutes;c_Mollicutes               | 0.0863  | 0.0023             | 0.0001           | 0.0022     | 0.0012           |
| Root;k_Bacteria;p_Verrucomicrobia;c_Verrucomicrobiae     | 0.4494  | 0.0744             | 0.1439           | -0.0695    | 0.0889           |

| Order level                                                               | P value | Mean water-treated | Mean CMC-treated | Difference | SE of difference |
|---------------------------------------------------------------------------|---------|--------------------|------------------|------------|------------------|
| Root;k_Bacteria;p_Actinobacteria;c_Actinobacteria;o_Actinomycetales       | 0.5486  | 0.0000             | 0.0000           | 0.0000     | 0.0000           |
| Root;k_Bacteria;p_Actinobacteria;c_Actinobacteria;o_Bifidobacteriales     | 0.1363  | 0.0018             | 0.0130           | -0.0113    | 0.0071           |
| Root;k_Bacteria;p_Actinobacteria;c_Thermoleophilia;o_Solirubrobacteriales |         |                    |                  |            |                  |
| Root;k_Bacteria;p_Bacteroidetes;c_Bacteroidia;o_Bacteroidales             | 0.9558  | 0.3847             | 0.3806           | 0.0042     | 0.0737           |
| Root;k_Bacteria;p_Bacteroidetes;c_Flavobacteriia;o_Flavobacteriales       |         |                    |                  |            |                  |
| Root;k_Bacteria;p_Bacteroidetes;c_Sphingobacteriia;o_Sphingobacteriales   |         |                    |                  |            |                  |

|                                                                              |        |        |        |         |        |
|------------------------------------------------------------------------------|--------|--------|--------|---------|--------|
| Root;k_Bacteria;p_Cyanobacteria;c_4C0d-2;o_YS2                               | 0.5611 | 0.0002 | 0.0001 | 0.0001  | 0.0002 |
| Root;k_Bacteria;p_Cyanobacteria;c_Chloroplast;o_Streptophyta                 | 0.9747 | 0.0002 | 0.0002 | 0.0000  | 0.0001 |
| Root;k_Bacteria;p_Deferribacteres;c_Deferribacteres;o_Deferribacterales      |        |        |        |         |        |
| Root;k_Bacteria;p_Firmicutes;c_Bacilli;o_                                    |        |        |        |         |        |
| Root;k_Bacteria;p_Firmicutes;c_Bacilli;o_Bacillales                          | 0.5486 | 0.0000 | 0.0000 | 0.0000  | 0.0000 |
| Root;k_Bacteria;p_Firmicutes;c_Bacilli;o_Lactobacillales                     | 0.5748 | 0.1599 | 0.1963 | -0.0364 | 0.0631 |
| Root;k_Bacteria;p_Firmicutes;c_Bacilli;o_Turicibacterales                    | 0.6261 | 0.0014 | 0.0024 | -0.0010 | 0.0019 |
| Root;k_Bacteria;p_Firmicutes;c_Clostridia;o_                                 | 0.0643 | 0.0091 | 0.0021 | 0.0070  | 0.0034 |
| Root;k_Bacteria;p_Firmicutes;c_Clostridia;o_Clostridiales                    | 0.0902 | 0.2796 | 0.1485 | 0.1311  | 0.0712 |
| Root;k_Bacteria;p_Firmicutes;c_Clostridia;o_Coriobacteriales                 | 0.6278 | 0.0067 | 0.0083 | -0.0017 | 0.0034 |
| Root;k_Bacteria;p_Firmicutes;c_Erysipelotrichi;o_Erysipelotrichales          | 0.2327 | 0.0303 | 0.0522 | -0.0219 | 0.0174 |
| Root;k_Bacteria;p_Planctomycetes;c_Planctomycetia;o_Gemmatales               |        |        |        |         |        |
| Root;k_Bacteria;p_Planctomycetes;c_Planctomycetia;o_Pirellulales             |        |        |        |         |        |
| Root;k_Bacteria;p_Planctomycetes;c_Planctomycetia;o_Planctomycetales         |        |        |        |         |        |
| Root;k_Bacteria;p_Proteobacteria;c_Alphaproteobacteria;o_                    |        |        |        |         |        |
| Root;k_Bacteria;p_Proteobacteria;c_Alphaproteobacteria;o_RF32                |        |        |        |         |        |
| Root;k_Bacteria;p_Proteobacteria;c_Alphaproteobacteria;o_Rhizobiales         | 0.7715 | 0.0000 | 0.0000 | 0.0000  | 0.0000 |
| Root;k_Bacteria;p_Proteobacteria;c_Alphaproteobacteria;o_Rhodobacterales     |        |        |        |         |        |
| Root;k_Bacteria;p_Proteobacteria;c_Alphaproteobacteria;o_Rickettsiales       | 0.6304 | 0.0002 | 0.0002 | -0.0001 | 0.0001 |
| Root;k_Bacteria;p_Proteobacteria;c_Alphaproteobacteria;o_Sphingomonadales    |        |        |        |         |        |
| Root;k_Bacteria;p_Proteobacteria;c_Betaproteobacteria;o_Burkholderiales      | 0.3830 | 0.0179 | 0.0284 | -0.0105 | 0.0115 |
| Root;k_Bacteria;p_Proteobacteria;c_Betaproteobacteria;o_Methylophilales      |        |        |        |         |        |
| Root;k_Bacteria;p_Proteobacteria;c_Betaproteobacteria;o_Rhodocyclales        |        |        |        |         |        |
| Root;k_Bacteria;p_Proteobacteria;c_Deltaproteobacteria;o_Desulfovibrionales  | 0.6530 | 0.0286 | 0.0210 | 0.0076  | 0.0165 |
| Root;k_Bacteria;p_Proteobacteria;c_Deltaproteobacteria;o_Myxococcales        |        |        |        |         |        |
| Root;k_Bacteria;p_Proteobacteria;c_Deltaproteobacteria;o_Spirobacillales     |        |        |        |         |        |
| Root;k_Bacteria;p_Proteobacteria;c_Epsilonproteobacteria;o_Campylobacterales | 0.1866 | 0.0007 | 0.0025 | -0.0017 | 0.0012 |
| Root;k_Bacteria;p_Proteobacteria;c_Gammaproteobacteria;o_Aeromonadales       |        |        |        |         |        |
| Root;k_Bacteria;p_Proteobacteria;c_Gammaproteobacteria;o_Enterobacteriales   | 0.5486 | 0.0017 | 0.0000 | 0.0017  | 0.0028 |
| Root;k_Bacteria;p_Proteobacteria;c_Gammaproteobacteria;o_Pasteurellales      | 0.9788 | 0.0001 | 0.0001 | 0.0000  | 0.0001 |
| Root;k_Bacteria;p_Proteobacteria;c_Gammaproteobacteria;o_Pseudomonadales     | 0.5486 | 0.0000 | 0.0000 | 0.0000  | 0.0000 |
| Root;k_Bacteria;p_Proteobacteria;c_Gammaproteobacteria;o_Xanthomonadales     |        |        |        |         |        |
| Root;k_Bacteria;p_TM7;c_TM7-3;o_CW040                                        | 0.4273 | 0.0001 | 0.0000 | 0.0001  | 0.0001 |
| Root;k_Bacteria;p_Tenericutes;c_Mollicutes;o_Acholeplasmatales               |        |        |        |         |        |
| Root;k_Bacteria;p_Tenericutes;c_Mollicutes;o_Anaeroplasmatales               | 0.4697 | 0.0001 | 0.0000 | 0.0001  | 0.0001 |
| Root;k_Bacteria;p_Tenericutes;c_Mollicutes;o_Mycoplasmatales                 |        |        |        |         |        |
| Root;k_Bacteria;p_Tenericutes;c_Mollicutes;o_RF39                            | 0.1062 | 0.0022 | 0.0001 | 0.0021  | 0.0012 |
| Root;k_Bacteria;p_Verrucomicrobia;c_Verrucomicrobiae;o_Verrucomicrobiales    | 0.4494 | 0.0744 | 0.1439 | -0.0695 | 0.0889 |

| Family level                                                                            | P value | Mean water-treated | Mean CMC-treated | Difference | SE of difference |
|-----------------------------------------------------------------------------------------|---------|--------------------|------------------|------------|------------------|
| Root;k_Bacteria;p_Actinobacteria;c_Actinobacteria;o_Actinomycetales;f_                  |         |                    |                  |            |                  |
| Root;k_Bacteria;p_Actinobacteria;c_Actinobacteria;o_Actinomycetales;f_ACK-M1            |         |                    |                  |            |                  |
| Root;k_Bacteria;p_Actinobacteria;c_Actinobacteria;o_Actinomycetales;f_Brevibacteriaceae |         |                    |                  |            |                  |

|                                                                                                 |               |               |               |                |               |
|-------------------------------------------------------------------------------------------------|---------------|---------------|---------------|----------------|---------------|
| Root;k_Bacteria;p_Actinobacteria;c_Actinobacteria;o_Actinomycetales;f_Corynebacteriaceae        | 0.5486        | 0.0000        | 0.0000        | 0.0000         | 0.0000        |
| Root;k_Bacteria;p_Actinobacteria;c_Actinobacteria;o_Actinomycetales;f_Dermabacteraceae          |               |               |               |                |               |
| Root;k_Bacteria;p_Actinobacteria;c_Actinobacteria;o_Actinomycetales;f_Frankiaceae               |               |               |               |                |               |
| Root;k_Bacteria;p_Actinobacteria;c_Actinobacteria;o_Actinomycetales;f_Kineosporiaceae           |               |               |               |                |               |
| Root;k_Bacteria;p_Actinobacteria;c_Actinobacteria;o_Actinomycetales;f_Microbacteriaceae         |               |               |               |                |               |
| Root;k_Bacteria;p_Actinobacteria;c_Actinobacteria;o_Actinomycetales;f_Micrococcaceae            |               |               |               |                |               |
| Root;k_Bacteria;p_Actinobacteria;c_Actinobacteria;o_Actinomycetales;f_Nocardiaceae              |               |               |               |                |               |
| Root;k_Bacteria;p_Actinobacteria;c_Actinobacteria;o_Actinomycetales;f_Promicromonosporaceae     |               |               |               |                |               |
| Root;k_Bacteria;p_Actinobacteria;c_Actinobacteria;o_Actinomycetales;f_Streptomycetaceae         |               |               |               |                |               |
| Root;k_Bacteria;p_Actinobacteria;c_Actinobacteria;o_Bifidobacteriales;f_                        |               |               |               |                |               |
| Root;k_Bacteria;p_Actinobacteria;c_Actinobacteria;o_Bifidobacteriales;f_Bifidobacteriaceae      | 0.1363        | 0.0018        | 0.0130        | -0.0113        | 0.0071        |
| Root;k_Bacteria;p_Actinobacteria;c_Thermoleophilia;o_Solirubrobacterales;f_Solirubrobacteraceae |               |               |               |                |               |
| <b>Root;k_Bacteria;p_Bacteroidetes;c_Bacteroidia;o_Bacteroidales;f_</b>                         | <b>0.0201</b> | <b>0.0000</b> | <b>0.0003</b> | <b>-0.0002</b> | <b>0.0001</b> |
| Root;k_Bacteria;p_Bacteroidetes;c_Bacteroidia;o_Bacteroidales;f_Bacteroidaceae                  | 0.1776        | 0.0427        | 0.0040        | 0.0388         | 0.0271        |
| Root;k_Bacteria;p_Bacteroidetes;c_Bacteroidia;o_Bacteroidales;f_Porphyrimonadaceae              | 0.8741        | 0.0056        | 0.0066        | -0.0011        | 0.0067        |
| Root;k_Bacteria;p_Bacteroidetes;c_Bacteroidia;o_Bacteroidales;f_Prevotellaceae                  | 0.4275        | 0.0020        | 0.0000        | 0.0020         | 0.0025        |
| Root;k_Bacteria;p_Bacteroidetes;c_Bacteroidia;o_Bacteroidales;f_Rikenellaceae                   | 0.6281        | 0.0149        | 0.0187        | -0.0038        | 0.0077        |
| Root;k_Bacteria;p_Bacteroidetes;c_Bacteroidia;o_Bacteroidales;f_S24-7                           | 0.6954        | 0.3187        | 0.3499        | -0.0312        | 0.0779        |
| Root;k_Bacteria;p_Bacteroidetes;c_Bacteroidia;o_Bacteroidales;f_[Odoribacteraceae]              | 0.7243        | 0.0008        | 0.0011        | -0.0002        | 0.0007        |
| Root;k_Bacteria;p_Bacteroidetes;c_Flavobacteriia;o_Flavobacteriales;f_Cryomorphaceae            |               |               |               |                |               |
| Root;k_Bacteria;p_Bacteroidetes;c_Flavobacteriia;o_Flavobacteriales;f_Flavobacteriaceae         |               |               |               |                |               |
| Root;k_Bacteria;p_Bacteroidetes;c_Sphingobacteriia;o_Sphingobacteriales;f_                      |               |               |               |                |               |
| Root;k_Bacteria;p_Bacteroidetes;c_Sphingobacteriia;o_Sphingobacteriales;f_Chitinophagaceae      |               |               |               |                |               |
| Root;k_Bacteria;p_Bacteroidetes;c_Sphingobacteriia;o_Sphingobacteriales;f_Flexibacteraceae      |               |               |               |                |               |
| Root;k_Bacteria;p_Cyanobacteria;c_4C0d-2;o_YS2;f_                                               | 0.5611        | 0.0002        | 0.0001        | 0.0001         | 0.0002        |
| Root;k_Bacteria;p_Cyanobacteria;c_Chloroplast;o_Streptophyta;f_                                 | 0.9747        | 0.0002        | 0.0002        | 0.0000         | 0.0001        |
| Root;k_Bacteria;p_Deferribacteres;c_Deferribacteres;o_Deferribacterales;f_Deferribacteraceae    |               |               |               |                |               |
| Root;k_Bacteria;p_Firmicutes;c_Bacilli;o_;                                                      |               |               |               |                |               |
| Root;k_Bacteria;p_Firmicutes;c_Bacilli;o_Bacillales;f_                                          |               |               |               |                |               |
| Root;k_Bacteria;p_Firmicutes;c_Bacilli;o_Bacillales;f_Alicyclobacillaceae                       |               |               |               |                |               |
| Root;k_Bacteria;p_Firmicutes;c_Bacilli;o_Bacillales;f_Bacillaceae                               |               |               |               |                |               |
| Root;k_Bacteria;p_Firmicutes;c_Bacilli;o_Bacillales;f_Paenibacillaceae                          |               |               |               |                |               |
| Root;k_Bacteria;p_Firmicutes;c_Bacilli;o_Bacillales;f_Planococcaceae                            |               |               |               |                |               |
| Root;k_Bacteria;p_Firmicutes;c_Bacilli;o_Bacillales;f_Staphylococcaceae                         | 0.5486        | 0.0000        | 0.0000        | 0.0000         | 0.0000        |
| Root;k_Bacteria;p_Firmicutes;c_Bacilli;o_Bacillales;f_Thermoactinomycetaceae                    |               |               |               |                |               |
| Root;k_Bacteria;p_Firmicutes;c_Bacilli;o_Lactobacillales;f_                                     |               |               |               |                |               |
| Root;k_Bacteria;p_Firmicutes;c_Bacilli;o_Lactobacillales;f_Aerococcaceae                        |               |               |               |                |               |
| Root;k_Bacteria;p_Firmicutes;c_Bacilli;o_Lactobacillales;f_Carnobacteriaceae                    | 0.3840        | 0.0000        | 0.0000        | 0.0000         | 0.0000        |
| Root;k_Bacteria;p_Firmicutes;c_Bacilli;o_Lactobacillales;f_Enterococcaceae                      | 0.5486        | 0.0000        | 0.0000        | 0.0000         | 0.0000        |
| Root;k_Bacteria;p_Firmicutes;c_Bacilli;o_Lactobacillales;f_Lactobacillaceae                     | 0.5733        | 0.1594        | 0.1959        | -0.0365        | 0.0631        |
| Root;k_Bacteria;p_Firmicutes;c_Bacilli;o_Lactobacillales;f_Leuconostocaceae                     |               |               |               |                |               |
| Root;k_Bacteria;p_Firmicutes;c_Bacilli;o_Lactobacillales;f_Streptococcaceae                     | 0.7508        | 0.0005        | 0.0004        | 0.0001         | 0.0002        |
| Root;k_Bacteria;p_Firmicutes;c_Bacilli;o_Turicibacterales;f_Turicibacteraceae                   | 0.6261        | 0.0014        | 0.0024        | -0.0010        | 0.0019        |

Chassaing et al, Supplemental Table 1.

|                                                                                                   |               |               |               |               |               |
|---------------------------------------------------------------------------------------------------|---------------|---------------|---------------|---------------|---------------|
| Root;k_Bacteria;p_Firmicutes;c_Clostridia;o_ ;f_                                                  | 0.0643        | 0.0091        | 0.0021        | 0.0070        | 0.0034        |
| Root;k_Bacteria;p_Firmicutes;c_Clostridia;o_Clostridiales;f_                                      | 0.1468        | 0.0018        | 0.0006        | 0.0012        | 0.0008        |
| Root;k_Bacteria;p_Firmicutes;c_Clostridia;o_Clostridiales;f_Clostridiaceae                        | 0.4155        | 0.0195        | 0.0553        | -0.0358       | 0.0424        |
| Root;k_Bacteria;p_Firmicutes;c_Clostridia;o_Clostridiales;f_Dehalobacteriaceae                    | 0.1498        | 0.0008        | 0.0001        | 0.0006        | 0.0004        |
| Root;k_Bacteria;p_Firmicutes;c_Clostridia;o_Clostridiales;f_Eubacteriaceae                        | 0.1168        | 0.0000        | 0.0000        | 0.0000        | 0.0000        |
| Root;k_Bacteria;p_Firmicutes;c_Clostridia;o_Clostridiales;f_Lachnospiraceae                       | 0.0998        | 0.2038        | 0.0802        | 0.1236        | 0.0693        |
| Root;k_Bacteria;p_Firmicutes;c_Clostridia;o_Clostridiales;f_Peptococcaceae                        | 0.3785        | 0.0000        | 0.0000        | 0.0000        | 0.0000        |
| Root;k_Bacteria;p_Firmicutes;c_Clostridia;o_Clostridiales;f_Peptostreptococcaceae                 | 0.8862        | 0.0020        | 0.0015        | 0.0005        | 0.0032        |
| <b>Root;k_Bacteria;p_Firmicutes;c_Clostridia;o_Clostridiales;f_Ruminococcaceae</b>                | <b>0.0364</b> | <b>0.0518</b> | <b>0.0107</b> | <b>0.0410</b> | <b>0.0174</b> |
| Root;k_Bacteria;p_Firmicutes;c_Clostridia;o_Coriobacteriales;f_                                   | 0.7040        | 0.0039        | 0.0049        | -0.0010       | 0.0026        |
| Root;k_Bacteria;p_Firmicutes;c_Clostridia;o_Coriobacteriales;f_Coriobacteriaceae                  | 0.6227        | 0.0028        | 0.0034        | -0.0007       | 0.0013        |
| Root;k_Bacteria;p_Firmicutes;c_Erysipelotrichi;o_Erysipelotrichales;f_Erysipelotrichaceae         | 0.3736        | 0.0270        | 0.0451        | -0.0181       | 0.0195        |
| Root;k_Bacteria;p_Firmicutes;c_Erysipelotrichi;o_Erysipelotrichales;f_[Coproba]cillaceae]         | 0.3816        | 0.0033        | 0.0071        | -0.0039       | 0.0043        |
| Root;k_Bacteria;p_Planctomycetes;c_Planctomycetia;o_Gemmatales;f_Gemmataceae                      |               |               |               |               |               |
| Root;k_Bacteria;p_Planctomycetes;c_Planctomycetia;o_Pirellulales;f_Pirellulaceae                  |               |               |               |               |               |
| Root;k_Bacteria;p_Planctomycetes;c_Planctomycetia;o_Planctomycetales;f_Planctomycetaceae          |               |               |               |               |               |
| Root;k_Bacteria;p_Proteobacteria;c_Alphaproteobacteria;o_ ;f_                                     |               |               |               |               |               |
| Root;k_Bacteria;p_Proteobacteria;c_Alphaproteobacteria;o_RF32;f_                                  |               |               |               |               |               |
| Root;k_Bacteria;p_Proteobacteria;c_Alphaproteobacteria;o_Rhizobiales;f_Brucellaceae               | 0.5486        | 0.0000        | 0.0000        | 0.0000        | 0.0000        |
| Root;k_Bacteria;p_Proteobacteria;c_Alphaproteobacteria;o_Rhizobiales;f_Hyphomicrobiaceae          | 0.5486        | 0.0000        | 0.0000        | 0.0000        | 0.0000        |
| Root;k_Bacteria;p_Proteobacteria;c_Alphaproteobacteria;o_Rhizobiales;f_Methylobacteriaceae        |               |               |               |               |               |
| Root;k_Bacteria;p_Proteobacteria;c_Alphaproteobacteria;o_Rhizobiales;f_Rhizobiaceae               | 0.1168        | 0.0000        | 0.0000        | 0.0000        | 0.0000        |
| Root;k_Bacteria;p_Proteobacteria;c_Alphaproteobacteria;o_Rhodobacterales;f_Rhodobacteraceae       |               |               |               |               |               |
| Root;k_Bacteria;p_Proteobacteria;c_Alphaproteobacteria;o_Rickettsiales;f_mitochondria             | 0.6304        | 0.0002        | 0.0002        | -0.0001       | 0.0001        |
| Root;k_Bacteria;p_Proteobacteria;c_Alphaproteobacteria;o_Sphingomonadales;f_Sphingomonadaceae     |               |               |               |               |               |
| Root;k_Bacteria;p_Proteobacteria;c_Betaproteobacteria;o_Burkholderiales;f_Alcaligenaceae          | 0.3821        | 0.0179        | 0.0284        | -0.0105       | 0.0115        |
| Root;k_Bacteria;p_Proteobacteria;c_Betaproteobacteria;o_Burkholderiales;f_Burkholderiaceae        |               |               |               |               |               |
| Root;k_Bacteria;p_Proteobacteria;c_Betaproteobacteria;o_Burkholderiales;f_Comamonadaceae          |               |               |               |               |               |
| Root;k_Bacteria;p_Proteobacteria;c_Betaproteobacteria;o_Burkholderiales;f_Oxalobacteraceae        | 0.5486        | 0.0000        | 0.0000        | 0.0000        | 0.0000        |
| Root;k_Bacteria;p_Proteobacteria;c_Betaproteobacteria;o_Methylophilales;f_Methylophilaceae        |               |               |               |               |               |
| Root;k_Bacteria;p_Proteobacteria;c_Betaproteobacteria;o_Rhodocyclales;f_Rhodocyclaceae            |               |               |               |               |               |
| Root;k_Bacteria;p_Proteobacteria;c_Deltaproteobacteria;o_Desulfovibrionales;f_Desulfovibrionaceae | 0.6530        | 0.0286        | 0.0210        | 0.0076        | 0.0165        |
| Root;k_Bacteria;p_Proteobacteria;c_Deltaproteobacteria;o_Myxococcales;f_                          |               |               |               |               |               |
| Root;k_Bacteria;p_Proteobacteria;c_Deltaproteobacteria;o_Myxococcales;f_Nannocystaceae            |               |               |               |               |               |
| Root;k_Bacteria;p_Proteobacteria;c_Deltaproteobacteria;o_Spirobacillales;f_                       |               |               |               |               |               |
| Root;k_Bacteria;p_Proteobacteria;c_Epsilonproteobacteria;o_Campylobacterales;f_Helicobacteraceae  | 0.1866        | 0.0007        | 0.0025        | -0.0017       | 0.0012        |
| Root;k_Bacteria;p_Proteobacteria;c_Gammaproteobacteria;o_Aeromonadales;f_                         |               |               |               |               |               |
| Root;k_Bacteria;p_Proteobacteria;c_Gammaproteobacteria;o_Aeromonadales;f_Aeromonadaceae           |               |               |               |               |               |
| Root;k_Bacteria;p_Proteobacteria;c_Gammaproteobacteria;o_Enterobacteriales;f_Enterobacteriaceae   | 0.5486        | 0.0017        | 0.0000        | 0.0017        | 0.0028        |
| Root;k_Bacteria;p_Proteobacteria;c_Gammaproteobacteria;o_Pasteurellales;f_Pasteurellaceae         | 0.9788        | 0.0001        | 0.0001        | 0.0000        | 0.0001        |
| Root;k_Bacteria;p_Proteobacteria;c_Gammaproteobacteria;o_Pseudomonadales;f_Moraxellaceae          |               |               |               |               |               |
| Root;k_Bacteria;p_Proteobacteria;c_Gammaproteobacteria;o_Pseudomonadales;f_Pseudomonadaceae       | 0.5486        | 0.0000        | 0.0000        | 0.0000        | 0.0000        |
| Root;k_Bacteria;p_Proteobacteria;c_Gammaproteobacteria;o_Xanthomonadales;f_Xanthomonadaceae       |               |               |               |               |               |

Chassaing et al, Supplemental Table 1.



|                                                                                                      |        |        |        |         |        |
|------------------------------------------------------------------------------------------------------|--------|--------|--------|---------|--------|
| Root;k__Bacteria;p__TM7;c__TM7-3;o__CW040;f__F16                                                     | 0.4273 | 0.0001 | 0.0000 | 0.0001  | 0.0001 |
| Root;k__Bacteria;p__Tenericutes;c__Mollicutes;o__Acholeplasmatales;f__Acholeplasmataceae             |        |        |        |         |        |
| Root;k__Bacteria;p__Tenericutes;c__Mollicutes;o__Anaeroplasmatales;f__Anaeroplasmataceae             | 0.4697 | 0.0001 | 0.0000 | 0.0001  | 0.0001 |
| Root;k__Bacteria;p__Tenericutes;c__Mollicutes;o__Mycoplasmatales;f__Mycoplasmataceae                 |        |        |        |         |        |
| Root;k__Bacteria;p__Tenericutes;c__Mollicutes;o__RF39;f__                                            | 0.1062 | 0.0022 | 0.0001 | 0.0021  | 0.0012 |
| Root;k__Bacteria;p__Verrucomicrobia;c__Verrucomicrobiae;o__Verrucomicrobiales;f__Verrucomicrobiaceae | 0.4494 | 0.0744 | 0.1439 | -0.0695 | 0.0889 |

## IL10<sup>-/-</sup> water versus IL10<sup>-/-</sup> CMC - Mucosa Associated Bacteria

| Phyla level                              | P value       | Mean water-treated | Mean CMC-treated | Difference     | SE of difference |
|------------------------------------------|---------------|--------------------|------------------|----------------|------------------|
| Root;k_Bacteria;p_Actinobacteria         | < 0.0001      | 0.0000             | 0.0012           | -0.0012        | 0.0002           |
| Root;k_Bacteria;p_Bacteroidetes          | 0.7239        | 0.3125             | 0.3479           | -0.0354        | 0.0977           |
| Root;k_Bacteria;p_Cyanobacteria          | 0.1667        | 0.0058             | 0.0125           | -0.0067        | 0.0045           |
| Root;k_Bacteria;p_Deferribacteres        |               |                    |                  |                |                  |
| Root;k_Bacteria;p_Firmicutes             | 0.0526        | 0.6295             | 0.4117           | 0.2178         | 0.1003           |
| Root;k_Bacteria;p_Planctomycetes         |               |                    |                  |                |                  |
| <b>Root;k_Bacteria;p_Proteobacteria</b>  | <b>0.0080</b> | <b>0.0268</b>      | <b>0.1360</b>    | <b>-0.1092</b> | <b>0.0338</b>    |
| Root;k_Bacteria;p_TM7                    | 0.5288        | 0.0000             | 0.0000           | 0.0000         | 0.0000           |
| Root;k_Bacteria;p_Tenericutes            | 0.2432        | 0.0054             | 0.0025           | 0.0029         | 0.0023           |
| <b>Root;k_Bacteria;p_Verrucomicrobia</b> | <b>0.0327</b> | <b>0.0199</b>      | <b>0.0882</b>    | <b>-0.0682</b> | <b>0.0279</b>    |

| Class level                                                  | P value       | Mean water-treated | Mean CMC-treated | Difference     | SE of difference |
|--------------------------------------------------------------|---------------|--------------------|------------------|----------------|------------------|
| Root;k_Bacteria;p_Actinobacteria;c_Actinobacteria            | 0.5990        | 0.0011             | 0.0007           | 0.0004         | 0.0007           |
| Root;k_Bacteria;p_Actinobacteria;c_Thermoleophilia           |               |                    |                  |                |                  |
| <b>Root;k_Bacteria;p_Bacteroidetes;c_Bacteroidia</b>         | <b>0.0381</b> | <b>0.2187</b>      | <b>0.4062</b>    | <b>-0.1875</b> | <b>0.0796</b>    |
| Root;k_Bacteria;p_Bacteroidetes;c_Flavobacteriia             | 0.3574        | 0.0001             | 0.0000           | 0.0001         | 0.0001           |
| Root;k_Bacteria;p_Bacteroidetes;c_Sphingobacteriia           | 0.3491        | 0.0001             | 0.0000           | 0.0001         | 0.0001           |
| Root;k_Bacteria;p_Cyanobacteria;c_4C0d-2                     | 0.0569        | 0.0036             | 0.0130           | -0.0095        | 0.0045           |
| Root;k_Bacteria;p_Cyanobacteria;c_Chloroplast                | 0.5768        | 0.0006             | 0.0001           | 0.0006         | 0.0010           |
| Root;k_Bacteria;p_Deferribacteres;c_Deferribacteres          |               |                    |                  |                |                  |
| Root;k_Bacteria;p_Firmicutes;c_Bacilli                       | 0.1692        | 0.0084             | 0.0156           | -0.0071        | 0.0048           |
| Root;k_Bacteria;p_Firmicutes;c_Clostridia                    | 0.3187        | 0.5586             | 0.4114           | 0.1472         | 0.1409           |
| Root;k_Bacteria;p_Firmicutes;c_Erysipelotrichi               | 0.3840        | 0.0069             | 0.0112           | -0.0044        | 0.0048           |
| Root;k_Bacteria;p_Planctomycetes;c_Planctomycetia            |               |                    |                  |                |                  |
| Root;k_Bacteria;p_Proteobacteria;c_Alphaproteobacteria       | 0.3004        | 0.0007             | 0.0001           | 0.0006         | 0.0006           |
| <b>Root;k_Bacteria;p_Proteobacteria;c_Betaproteobacteria</b> | <b>0.0139</b> | <b>0.0081</b>      | <b>0.0250</b>    | <b>-0.0169</b> | <b>0.0058</b>    |
| Root;k_Bacteria;p_Proteobacteria;c_Deltaproteobacteria       | 0.5116        | 0.0100             | 0.0076           | 0.0025         | 0.0036           |
| Root;k_Bacteria;p_Proteobacteria;c_Epsilonproteobacteria     | 0.9662        | 0.0307             | 0.0318           | -0.0011        | 0.0247           |
| Root;k_Bacteria;p_Proteobacteria;c_Gammaproteobacteria       | 0.2656        | 0.1423             | 0.0003           | 0.1420         | 0.1210           |
| Root;k_Bacteria;p_TM7;c_TM7-3                                | 0.5288        | 0.0000             | 0.0000           | 0.0000         | 0.0000           |
| Root;k_Bacteria;p_Tenericutes;c_Mollicutes                   | 0.4988        | 0.0058             | 0.0040           | 0.0018         | 0.0026           |
| <b>Root;k_Bacteria;p_Verrucomicrobia;c_Verrucomicrobiae</b>  | <b>0.0348</b> | <b>0.0043</b>      | <b>0.0732</b>    | <b>-0.0688</b> | <b>0.0286</b>    |

| Order level                                                              | P value       | Mean water-treated | Mean CMC-treated | Difference     | SE of difference |
|--------------------------------------------------------------------------|---------------|--------------------|------------------|----------------|------------------|
| Root;k_Bacteria;p_Actinobacteria;c_Actinobacteria;o_Actinomycetales      | 0.9444        | 0.0000             | 0.0000           | 0.0000         | 0.0001           |
| Root;k_Bacteria;p_Actinobacteria;c_Actinobacteria;o_Bifidobacteriales    | 0.5688        | 0.0010             | 0.0006           | 0.0004         | 0.0007           |
| Root;k_Bacteria;p_Actinobacteria;c_Thermoleophilia;o_Solirubrobacterales |               |                    |                  |                |                  |
| <b>Root;k_Bacteria;p_Bacteroidetes;c_Bacteroidia;o_Bacteroidales</b>     | <b>0.0381</b> | <b>0.2187</b>      | <b>0.4062</b>    | <b>-0.1875</b> | <b>0.0796</b>    |
| Root;k_Bacteria;p_Bacteroidetes;c_Flavobacteriia;o_Flavobacteriales      | 0.3574        | 0.0001             | 0.0000           | 0.0001         | 0.0001           |
| Root;k_Bacteria;p_Bacteroidetes;c_Sphingobacteriia;o_Sphingobacteriales  | 0.3491        | 0.0001             | 0.0000           | 0.0001         | 0.0001           |

|                                                                                  |               |               |               |                |               |
|----------------------------------------------------------------------------------|---------------|---------------|---------------|----------------|---------------|
| Root;k_Bacteria;p_Cyanobacteria;c_4C0d-2;o_YS2                                   | 0.0569        | 0.0036        | 0.0130        | -0.0095        | 0.0045        |
| Root;k_Bacteria;p_Cyanobacteria;c_Chloroplast;o_Streptophyta                     | 0.5768        | 0.0006        | 0.0001        | 0.0006         | 0.0010        |
| Root;k_Bacteria;p_Deferribacteres;c_Deferribacteres;o_Deferribacterales          |               |               |               |                |               |
| Root;k_Bacteria;p_Firmicutes;c_Bacilli;o_                                        |               |               |               |                |               |
| Root;k_Bacteria;p_Firmicutes;c_Bacilli;o_Bacillales                              |               |               |               |                |               |
| Root;k_Bacteria;p_Firmicutes;c_Bacilli;o_Lactobacillales                         | 0.1159        | 0.0074        | 0.0152        | -0.0078        | 0.0046        |
| Root;k_Bacteria;p_Firmicutes;c_Bacilli;o_Turicibacterales                        | 0.5764        | 0.0010        | 0.0003        | 0.0007         | 0.0012        |
| Root;k_Bacteria;p_Firmicutes;c_Clostridia;o_                                     | 0.1743        | 0.0167        | 0.0330        | -0.0163        | 0.0112        |
| Root;k_Bacteria;p_Firmicutes;c_Clostridia;o_Clostridiales                        | 0.2556        | 0.5323        | 0.3737        | 0.1586         | 0.1322        |
| Root;k_Bacteria;p_Firmicutes;c_Clostridia;o_Coriobacterales                      | 0.1829        | 0.0096        | 0.0047        | 0.0049         | 0.0035        |
| Root;k_Bacteria;p_Firmicutes;c_Erysipelotrichi;o_Erysipelotrichales              | 0.3840        | 0.0069        | 0.0112        | -0.0044        | 0.0048        |
| Root;k_Bacteria;p_Planctomycetes;c_Planctomycetia;o_Gemmatales                   |               |               |               |                |               |
| Root;k_Bacteria;p_Planctomycetes;c_Planctomycetia;o_Pirellulales                 |               |               |               |                |               |
| Root;k_Bacteria;p_Planctomycetes;c_Planctomycetia;o_Planctomycetales             |               |               |               |                |               |
| Root;k_Bacteria;p_Proteobacteria;c_Alphaproteobacteria;o_                        | 0.5288        | 0.0000        | 0.0000        | 0.0000         | 0.0001        |
| Root;k_Bacteria;p_Proteobacteria;c_Alphaproteobacteria;o_RF32                    | 0.4317        | 0.0005        | 0.0000        | 0.0005         | 0.0006        |
| Root;k_Bacteria;p_Proteobacteria;c_Alphaproteobacteria;o_Rhizobiales             | 0.5288        | 0.0000        | 0.0000        | 0.0000         | 0.0001        |
| Root;k_Bacteria;p_Proteobacteria;c_Alphaproteobacteria;o_Rhodobacterales         |               |               |               |                |               |
| Root;k_Bacteria;p_Proteobacteria;c_Alphaproteobacteria;o_Rickettsiales           | 0.5288        | 0.0001        | 0.0000        | 0.0001         | 0.0001        |
| Root;k_Bacteria;p_Proteobacteria;c_Alphaproteobacteria;o_Sphingomonadales        | 0.5770        | 0.0000        | 0.0001        | 0.0000         | 0.0001        |
| <b>Root;k_Bacteria;p_Proteobacteria;c_Betaproteobacteria;o_Burkholderiales</b>   | <b>0.0139</b> | <b>0.0081</b> | <b>0.0250</b> | <b>-0.0169</b> | <b>0.0058</b> |
| Root;k_Bacteria;p_Proteobacteria;c_Betaproteobacteria;o_Methylophilales          |               |               |               |                |               |
| Root;k_Bacteria;p_Proteobacteria;c_Betaproteobacteria;o_Rhodocyclales            |               |               |               |                |               |
| Root;k_Bacteria;p_Proteobacteria;c_Deltaproteobacteria;o_Desulfovibrionales      | 0.5146        | 0.0100        | 0.0076        | 0.0024         | 0.0036        |
| Root;k_Bacteria;p_Proteobacteria;c_Deltaproteobacteria;o_Myxococcales            | 0.5288        | 0.0000        | 0.0000        | 0.0000         | 0.0000        |
| Root;k_Bacteria;p_Proteobacteria;c_Deltaproteobacteria;o_Spirobacillales         |               |               |               |                |               |
| Root;k_Bacteria;p_Proteobacteria;c_Epsilonproteobacteria;o_Campylobacterales     | 0.9662        | 0.0307        | 0.0318        | -0.0011        | 0.0247        |
| Root;k_Bacteria;p_Proteobacteria;c_Gammaproteobacteria;o_Aeromonadales           | 0.2648        | 0.0002        | 0.0000        | 0.0002         | 0.0001        |
| Root;k_Bacteria;p_Proteobacteria;c_Gammaproteobacteria;o_Enterobacterales        | 0.2657        | 0.1418        | 0.0000        | 0.1418         | 0.1210        |
| <b>Root;k_Bacteria;p_Proteobacteria;c_Gammaproteobacteria;o_Pasteurellales</b>   | <b>0.0348</b> | <b>0.0000</b> | <b>0.0003</b> | <b>-0.0003</b> | <b>0.0001</b> |
| Root;k_Bacteria;p_Proteobacteria;c_Gammaproteobacteria;o_Pseudomonadales         | 0.4650        | 0.0003        | 0.0000        | 0.0003         | 0.0004        |
| Root;k_Bacteria;p_Proteobacteria;c_Gammaproteobacteria;o_Xanthomonadales         |               |               |               |                |               |
| Root;k_Bacteria;p_TM7;c_TM7-3;o_CW040                                            | 0.5288        | 0.0000        | 0.0000        | 0.0000         | 0.0000        |
| Root;k_Bacteria;p_Tenericutes;c_Mollicutes;o_Acholeplasmatales                   |               |               |               |                |               |
| Root;k_Bacteria;p_Tenericutes;c_Mollicutes;o_Anaeroplasmatales                   | 0.7935        | 0.0015        | 0.0020        | -0.0005        | 0.0020        |
| Root;k_Bacteria;p_Tenericutes;c_Mollicutes;o_Mycoplasmatales                     | 0.3409        | 0.0018        | 0.0000        | 0.0018         | 0.0018        |
| Root;k_Bacteria;p_Tenericutes;c_Mollicutes;o_RF39                                | 0.7415        | 0.0025        | 0.0019        | 0.0006         | 0.0018        |
| <b>Root;k_Bacteria;p_Verrucomicrobia;c_Verrucomicrobiae;o_Verrucomicrobiales</b> | <b>0.0348</b> | <b>0.0043</b> | <b>0.0732</b> | <b>-0.0688</b> | <b>0.0286</b> |

| Family level                                                                            | P value | Mean water-treated | Mean CMC-treated | Difference | SE of difference |
|-----------------------------------------------------------------------------------------|---------|--------------------|------------------|------------|------------------|
| Root;k_Bacteria;p_Actinobacteria;c_Actinobacteria;o_Actinomycetales;f_                  | 0.5288  | 0.0000             | 0.0000           | 0.0000     | 0.0001           |
| Root;k_Bacteria;p_Actinobacteria;c_Actinobacteria;o_Actinomycetales;f_ACK-M1            |         |                    |                  |            |                  |
| Root;k_Bacteria;p_Actinobacteria;c_Actinobacteria;o_Actinomycetales;f_Brevibacteriaceae |         |                    |                  |            |                  |

|                                                                                                 |               |               |               |                |               |
|-------------------------------------------------------------------------------------------------|---------------|---------------|---------------|----------------|---------------|
| Root;k_Bacteria;p_Actinobacteria;c_Actinobacteria;o_Actinomycetales;f_Corynebacteriaceae        |               |               |               |                |               |
| Root;k_Bacteria;p_Actinobacteria;c_Actinobacteria;o_Actinomycetales;f_Dermabacteraceae          |               |               |               |                |               |
| Root;k_Bacteria;p_Actinobacteria;c_Actinobacteria;o_Actinomycetales;f_Frankiaceae               |               |               |               |                |               |
| Root;k_Bacteria;p_Actinobacteria;c_Actinobacteria;o_Actinomycetales;f_Kineosporiaceae           |               |               |               |                |               |
| Root;k_Bacteria;p_Actinobacteria;c_Actinobacteria;o_Actinomycetales;f_Microbacteriaceae         | 0.1394        | 0.0000        | 0.0000        | 0.0000         | 0.0000        |
| Root;k_Bacteria;p_Actinobacteria;c_Actinobacteria;o_Actinomycetales;f_Micrococccaceae           |               |               |               |                |               |
| Root;k_Bacteria;p_Actinobacteria;c_Actinobacteria;o_Actinomycetales;f_Nocardiaceae              |               |               |               |                |               |
| Root;k_Bacteria;p_Actinobacteria;c_Actinobacteria;o_Actinomycetales;f_Promicromonosporaceae     |               |               |               |                |               |
| Root;k_Bacteria;p_Actinobacteria;c_Actinobacteria;o_Actinomycetales;f_Streptomycetaceae         |               |               |               |                |               |
| Root;k_Bacteria;p_Actinobacteria;c_Actinobacteria;o_Bifidobacteriales;f_                        |               |               |               |                |               |
| Root;k_Bacteria;p_Actinobacteria;c_Actinobacteria;o_Bifidobacteriales;f_Bifidobacteriaceae      | 0.5688        | 0.0010        | 0.0006        | 0.0004         | 0.0007        |
| Root;k_Bacteria;p_Actinobacteria;c_Thermoleophilia;o_Solirubrobacterales;f_Solirubrobacteraceae |               |               |               |                |               |
| Root;k_Bacteria;p_Bacteroidetes;c_Bacteroidia;o_Bacteroidales;f_                                | 0.4899        | 0.0002        | 0.0000        | 0.0002         | 0.0003        |
| Root;k_Bacteria;p_Bacteroidetes;c_Bacteroidia;o_Bacteroidales;f_Bacteroidaceae                  | 0.2526        | 0.0307        | 0.0146        | 0.0161         | 0.0133        |
| Root;k_Bacteria;p_Bacteroidetes;c_Bacteroidia;o_Bacteroidales;f_Porphyrimonadaceae              | 0.8416        | 0.0075        | 0.0061        | 0.0014         | 0.0070        |
| Root;k_Bacteria;p_Bacteroidetes;c_Bacteroidia;o_Bacteroidales;f_Prevotellaceae                  | 0.7936        | 0.0022        | 0.0027        | -0.0006        | 0.0021        |
| Root;k_Bacteria;p_Bacteroidetes;c_Bacteroidia;o_Bacteroidales;f_Rikenellaceae                   | 0.2250        | 0.0360        | 0.0597        | -0.0237        | 0.0184        |
| <b>Root;k_Bacteria;p_Bacteroidetes;c_Bacteroidia;o_Bacteroidales;f_S24-7</b>                    | <b>0.0253</b> | <b>0.1321</b> | <b>0.3105</b> | <b>-0.1783</b> | <b>0.0690</b> |
| Root;k_Bacteria;p_Bacteroidetes;c_Bacteroidia;o_Bacteroidales;f_[Odoribacteraceae]              | 0.8258        | 0.0100        | 0.0127        | -0.0027        | 0.0119        |
| Root;k_Bacteria;p_Bacteroidetes;c_Flavobacteriia;o_Flavobacteriales;f_Cryomorphaceae            |               |               |               |                |               |
| Root;k_Bacteria;p_Bacteroidetes;c_Flavobacteriia;o_Flavobacteriales;f_Flavobacteriaceae         | 0.3574        | 0.0001        | 0.0000        | 0.0001         | 0.0001        |
| Root;k_Bacteria;p_Bacteroidetes;c_Sphingobacteriia;o_Sphingobacteriales;f_                      |               |               |               |                |               |
| Root;k_Bacteria;p_Bacteroidetes;c_Sphingobacteriia;o_Sphingobacteriales;f_Chitinophagaceae      | 0.5288        | 0.0000        | 0.0000        | 0.0000         | 0.0001        |
| Root;k_Bacteria;p_Bacteroidetes;c_Sphingobacteriia;o_Sphingobacteriales;f_Flexibacteraceae      | 0.5288        | 0.0000        | 0.0000        | 0.0000         | 0.0001        |
| Root;k_Bacteria;p_Cyanobacteria;c_4C0d-2;o_YS2;f_                                               | 0.0569        | 0.0036        | 0.0130        | -0.0095        | 0.0045        |
| Root;k_Bacteria;p_Cyanobacteria;c_Chloroplast;o_Streptophyta;f_                                 | 0.5768        | 0.0006        | 0.0001        | 0.0006         | 0.0010        |
| Root;k_Bacteria;p_Deferribacteres;c_Deferribacteres;o_Deferribacterales;f_Deferribacteraceae    |               |               |               |                |               |
| Root;k_Bacteria;p_Firmicutes;c_Bacilli;o_;                                                      |               |               |               |                |               |
| Root;k_Bacteria;p_Firmicutes;c_Bacilli;o_Bacillales;f_                                          |               |               |               |                |               |
| Root;k_Bacteria;p_Firmicutes;c_Bacilli;o_Bacillales;f_Alicyclobacillaceae                       |               |               |               |                |               |
| Root;k_Bacteria;p_Firmicutes;c_Bacilli;o_Bacillales;f_Bacillaceae                               |               |               |               |                |               |
| Root;k_Bacteria;p_Firmicutes;c_Bacilli;o_Bacillales;f_Paenibacillaceae                          |               |               |               |                |               |
| Root;k_Bacteria;p_Firmicutes;c_Bacilli;o_Bacillales;f_Planococcaceae                            |               |               |               |                |               |
| Root;k_Bacteria;p_Firmicutes;c_Bacilli;o_Bacillales;f_Staphylococcaceae                         |               |               |               |                |               |
| Root;k_Bacteria;p_Firmicutes;c_Bacilli;o_Bacillales;f_Thermoactinomycetaceae                    |               |               |               |                |               |
| Root;k_Bacteria;p_Firmicutes;c_Bacilli;o_Lactobacillales;f_                                     |               |               |               |                |               |
| Root;k_Bacteria;p_Firmicutes;c_Bacilli;o_Lactobacillales;f_Aerococcaceae                        |               |               |               |                |               |
| Root;k_Bacteria;p_Firmicutes;c_Bacilli;o_Lactobacillales;f_Carnobacteriaceae                    |               |               |               |                |               |
| Root;k_Bacteria;p_Firmicutes;c_Bacilli;o_Lactobacillales;f_Enterococcaceae                      |               |               |               |                |               |
| Root;k_Bacteria;p_Firmicutes;c_Bacilli;o_Lactobacillales;f_Lactobacillaceae                     | 0.1159        | 0.0074        | 0.0152        | -0.0078        | 0.0046        |
| Root;k_Bacteria;p_Firmicutes;c_Bacilli;o_Lactobacillales;f_Leuconostocaceae                     |               |               |               |                |               |
| Root;k_Bacteria;p_Firmicutes;c_Bacilli;o_Lactobacillales;f_Streptococcaceae                     |               |               |               |                |               |
| Root;k_Bacteria;p_Firmicutes;c_Bacilli;o_Turicibacterales;f_Turicibacteraceae                   | 0.5764        | 0.0010        | 0.0003        | 0.0007         | 0.0012        |

Chassaing et al, Supplemental Table 1.

|                                                                                                   |               |               |               |                |               |
|---------------------------------------------------------------------------------------------------|---------------|---------------|---------------|----------------|---------------|
| Root;k_Bacteria;p_Firmicutes;c_Clostridia;o_f__                                                   | 0.1743        | 0.0167        | 0.0330        | -0.0163        | 0.0112        |
| Root;k_Bacteria;p_Firmicutes;c_Clostridia;o_Clostridiales;f__                                     | 0.1643        | 0.0209        | 0.0067        | 0.0142         | 0.0095        |
| Root;k_Bacteria;p_Firmicutes;c_Clostridia;o_Clostridiales;f_Clostridiaceae                        | 0.1388        | 0.0027        | 0.0493        | -0.0466        | 0.0292        |
| Root;k_Bacteria;p_Firmicutes;c_Clostridia;o_Clostridiales;f_Dehalobacteriaceae                    | 0.8298        | 0.0019        | 0.0017        | 0.0002         | 0.0009        |
| Root;k_Bacteria;p_Firmicutes;c_Clostridia;o_Clostridiales;f_Eubacteriaceae                        |               |               |               |                |               |
| Root;k_Bacteria;p_Firmicutes;c_Clostridia;o_Clostridiales;f_Lachnospiraceae                       | 0.2375        | 0.3243        | 0.2041        | 0.1202         | 0.0962        |
| Root;k_Bacteria;p_Firmicutes;c_Clostridia;o_Clostridiales;f_Peptococcaceae                        | 0.4121        | 0.0003        | 0.0000        | 0.0003         | 0.0003        |
| Root;k_Bacteria;p_Firmicutes;c_Clostridia;o_Clostridiales;f_Peptostreptococcaceae                 | 0.0994        | 0.0002        | 0.0027        | -0.0025        | 0.0014        |
| Root;k_Bacteria;p_Firmicutes;c_Clostridia;o_Clostridiales;f_Ruminococcaceae                       | 0.1684        | 0.1820        | 0.1093        | 0.0727         | 0.0493        |
| Root;k_Bacteria;p_Firmicutes;c_Clostridia;o_Coriobacteriales;f__                                  | 0.1821        | 0.0092        | 0.0042        | 0.0050         | 0.0035        |
| Root;k_Bacteria;p_Firmicutes;c_Clostridia;o_Coriobacteriales;f_Coriobacteriaceae                  | 0.8509        | 0.0004        | 0.0005        | 0.0000         | 0.0002        |
| Root;k_Bacteria;p_Firmicutes;c_Erysipelotrichi;o_Erysipelotrichales;f_Erysipelotrichaceae         | 0.4926        | 0.0064        | 0.0038        | 0.0026         | 0.0037        |
| <b>Root;k_Bacteria;p_Firmicutes;c_Erysipelotrichi;o_Erysipelotrichales;f_[Coprobacillaceae]</b>   | <b>0.0364</b> | <b>0.0005</b> | <b>0.0074</b> | <b>-0.0070</b> | <b>0.0029</b> |
| Root;k_Bacteria;p_Planctomycetes;c_Planctomycetia;o_Gemmatales;f_Gemmataceae                      |               |               |               |                |               |
| Root;k_Bacteria;p_Planctomycetes;c_Planctomycetia;o_Pirellulales;f_Pirellulaceae                  |               |               |               |                |               |
| Root;k_Bacteria;p_Planctomycetes;c_Planctomycetia;o_Planctomycetales;f_Planctomycetaceae          |               |               |               |                |               |
| Root;k_Bacteria;p_Proteobacteria;c_Alphaproteobacteria;o_f__                                      | 0.5288        | 0.0000        | 0.0000        | 0.0000         | 0.0001        |
| Root;k_Bacteria;p_Proteobacteria;c_Alphaproteobacteria;o_RF32;f__                                 | 0.4317        | 0.0005        | 0.0000        | 0.0005         | 0.0006        |
| Root;k_Bacteria;p_Proteobacteria;c_Alphaproteobacteria;o_Rhizobiales;f_Brucellaceae               |               |               |               |                |               |
| Root;k_Bacteria;p_Proteobacteria;c_Alphaproteobacteria;o_Rhizobiales;f_Hyphomicrobiaceae          |               |               |               |                |               |
| Root;k_Bacteria;p_Proteobacteria;c_Alphaproteobacteria;o_Rhizobiales;f_Methylobacteriaceae        | 0.5288        | 0.0000        | 0.0000        | 0.0000         | 0.0001        |
| Root;k_Bacteria;p_Proteobacteria;c_Alphaproteobacteria;o_Rhizobiales;f_Rhizobiaceae               |               |               |               |                |               |
| Root;k_Bacteria;p_Proteobacteria;c_Alphaproteobacteria;o_Rhodobacterales;f_Rhodobacteraceae       |               |               |               |                |               |
| Root;k_Bacteria;p_Proteobacteria;c_Alphaproteobacteria;o_Rickettsiales;f_mitochondria             | 0.5288        | 0.0001        | 0.0000        | 0.0001         | 0.0001        |
| Root;k_Bacteria;p_Proteobacteria;c_Alphaproteobacteria;o_Sphingomonadales;f_Sphingomonadaceae     | 0.5770        | 0.0000        | 0.0001        | 0.0000         | 0.0001        |
| <b>Root;k_Bacteria;p_Proteobacteria;c_Betaproteobacteria;o_Burkholderiales;f_Alcaligenaceae</b>   | <b>0.0136</b> | <b>0.0080</b> | <b>0.0249</b> | <b>-0.0169</b> | <b>0.0058</b> |
| Root;k_Bacteria;p_Proteobacteria;c_Betaproteobacteria;o_Burkholderiales;f_Burkholderiaceae        |               |               |               |                |               |
| Root;k_Bacteria;p_Proteobacteria;c_Betaproteobacteria;o_Burkholderiales;f_Comamonadaceae          | 0.5288        | 0.0000        | 0.0000        | 0.0000         | 0.0001        |
| Root;k_Bacteria;p_Proteobacteria;c_Betaproteobacteria;o_Burkholderiales;f_Oxalobacteraceae        | 0.1394        | 0.0000        | 0.0000        | 0.0000         | 0.0000        |
| Root;k_Bacteria;p_Proteobacteria;c_Betaproteobacteria;o_Methylophilales;f_Methylophilaceae        |               |               |               |                |               |
| Root;k_Bacteria;p_Proteobacteria;c_Betaproteobacteria;o_Rhodocyclales;f_Rhodocyclaceae            |               |               |               |                |               |
| Root;k_Bacteria;p_Proteobacteria;c_Deltaproteobacteria;o_Desulfovibrionales;f_Desulfovibrionaceae | 0.5146        | 0.0100        | 0.0076        | 0.0024         | 0.0036        |
| Root;k_Bacteria;p_Proteobacteria;c_Deltaproteobacteria;o_Myxococcales;f__                         |               |               |               |                |               |
| Root;k_Bacteria;p_Proteobacteria;c_Deltaproteobacteria;o_Myxococcales;f_Nannocystaceae            | 0.5288        | 0.0000        | 0.0000        | 0.0000         | 0.0000        |
| Root;k_Bacteria;p_Proteobacteria;c_Deltaproteobacteria;o_Spirobacillales;f__                      |               |               |               |                |               |
| Root;k_Bacteria;p_Proteobacteria;c_Epsilonproteobacteria;o_Campylobacterales;f_Helicobacteraceae  | 0.9662        | 0.0307        | 0.0318        | -0.0011        | 0.0247        |
| Root;k_Bacteria;p_Proteobacteria;c_Gammaproteobacteria;o_Aeromonadales;f__                        | 0.2648        | 0.0002        | 0.0000        | 0.0002         | 0.0001        |
| Root;k_Bacteria;p_Proteobacteria;c_Gammaproteobacteria;o_Aeromonadales;f_Aeromonadaceae           |               |               |               |                |               |
| Root;k_Bacteria;p_Proteobacteria;c_Gammaproteobacteria;o_Enterobacteriales;f_Enterobacteriaceae   | 0.2657        | 0.1418        | 0.0000        | 0.1418         | 0.1210        |
| <b>Root;k_Bacteria;p_Proteobacteria;c_Gammaproteobacteria;o_Pasteurellales;f_Pasteurellaceae</b>  | <b>0.0348</b> | <b>0.0000</b> | <b>0.0003</b> | <b>-0.0003</b> | <b>0.0001</b> |
| Root;k_Bacteria;p_Proteobacteria;c_Gammaproteobacteria;o_Pseudomonadales;f_Moraxellaceae          | 0.4650        | 0.0003        | 0.0000        | 0.0003         | 0.0004        |
| Root;k_Bacteria;p_Proteobacteria;c_Gammaproteobacteria;o_Pseudomonadales;f_Pseudomonadaceae       |               |               |               |                |               |
| Root;k_Bacteria;p_Proteobacteria;c_Gammaproteobacteria;o_Xanthomonadales;f_Xanthomonadaceae       |               |               |               |                |               |

|                                                                                                             |               |               |               |                |               |
|-------------------------------------------------------------------------------------------------------------|---------------|---------------|---------------|----------------|---------------|
| Root;k__Bacteria;p__TM7;c__TM7-3;o__CW040;f__F16                                                            | 0.5288        | 0.0000        | 0.0000        | 0.0000         | 0.0000        |
| Root;k__Bacteria;p__Tenericutes;c__Mollicutes;o__Acholeplasmatales;f__Acholeplasmataceae                    |               |               |               |                |               |
| Root;k__Bacteria;p__Tenericutes;c__Mollicutes;o__Anaeroplasmatales;f__Anaeroplasmataceae                    | 0.7935        | 0.0015        | 0.0020        | -0.0005        | 0.0020        |
| Root;k__Bacteria;p__Tenericutes;c__Mollicutes;o__Mycoplasmatales;f__Mycoplasmataceae                        | 0.3409        | 0.0018        | 0.0000        | 0.0018         | 0.0018        |
| Root;k__Bacteria;p__Tenericutes;c__Mollicutes;o__RF39;f__                                                   | 0.7415        | 0.0025        | 0.0019        | 0.0006         | 0.0018        |
| <b>Root;k__Bacteria;p__Verrucomicrobia;c__Verrucomicrobiae;o__Verrucomicrobiales;f__Verrucomicrobiaceae</b> | <b>0.0348</b> | <b>0.0043</b> | <b>0.0732</b> | <b>-0.0688</b> | <b>0.0286</b> |

IL10<sup>-/-</sup> water versus IL10<sup>-/-</sup> P80 - Feces

| Phyla level                              | P value       | Mean water-treated | Mean P80-treated | Difference     | SE of difference |
|------------------------------------------|---------------|--------------------|------------------|----------------|------------------|
| Root;k_Bacteria;p_Actinobacteria         | 0.3135        | 0.0005             | 0.0000           | 0.0005         | 0.0005           |
| Root;k_Bacteria;p_Bacteroidetes          | 0.8754        | 0.4231             | 0.4348           | -0.0117        | 0.0735           |
| Root;k_Bacteria;p_Cyanobacteria          | 0.3219        | 0.0006             | 0.0008           | -0.0002        | 0.0002           |
| Root;k_Bacteria;p_Deferribacteres        |               |                    |                  |                |                  |
| Root;k_Bacteria;p_Firmicutes             | 0.3710        | 0.5171             | 0.4522           | 0.0649         | 0.0700           |
| Root;k_Bacteria;p_Planctomycetes         |               |                    |                  |                |                  |
| Root;k_Bacteria;p_Proteobacteria         | 0.0973        | 0.0491             | 0.0277           | 0.0214         | 0.0120           |
| Root;k_Bacteria;p_TM7                    | 0.3724        | 0.0001             | 0.0000           | 0.0001         | 0.0001           |
| Root;k_Bacteria;p_Tenericutes            | 0.6162        | 0.0025             | 0.0018           | 0.0007         | 0.0013           |
| <b>Root;k_Bacteria;p_Verrucomicrobia</b> | <b>0.0176</b> | <b>0.0071</b>      | <b>0.0826</b>    | <b>-0.0755</b> | <b>0.0278</b>    |

| Class level                                                     | P value       | Mean water-treated | Mean P80-treated | Difference     | SE of difference |
|-----------------------------------------------------------------|---------------|--------------------|------------------|----------------|------------------|
| Root;k_Bacteria;p_Actinobacteria;c_Actinobacteria               | 0.4649        | 0.0018             | 0.0044           | -0.0026        | 0.0035           |
| Root;k_Bacteria;p_Actinobacteria;c_Thermoleophilia              |               |                    |                  |                |                  |
| Root;k_Bacteria;p_Bacteroidetes;c_Bacteroidia                   | 0.1648        | 0.3847             | 0.5016           | -0.1169        | 0.0794           |
| Root;k_Bacteria;p_Bacteroidetes;c_Flavobacteriia                |               |                    |                  |                |                  |
| Root;k_Bacteria;p_Bacteroidetes;c_Sphingobacteriia              |               |                    |                  |                |                  |
| Root;k_Bacteria;p_Cyanobacteria;c_4C0d-2                        | 0.1172        | 0.0002             | 0.0026           | -0.0024        | 0.0014           |
| Root;k_Bacteria;p_Cyanobacteria;c_Chloroplast                   | 0.1391        | 0.0002             | 0.0005           | -0.0002        | 0.0001           |
| Root;k_Bacteria;p_Deferribacteres;c_Deferribacteres             |               |                    |                  |                |                  |
| <b>Root;k_Bacteria;p_Firmicutes;c_Bacilli</b>                   | <b>0.0333</b> | <b>0.1613</b>      | <b>0.0789</b>    | <b>0.0825</b>  | <b>0.0347</b>    |
| Root;k_Bacteria;p_Firmicutes;c_Clostridia                       | 0.9844        | 0.2954             | 0.2939           | 0.0014         | 0.0719           |
| Root;k_Bacteria;p_Firmicutes;c_Erysipelotrichi                  | 0.5150        | 0.0303             | 0.0217           | 0.0086         | 0.0129           |
| Root;k_Bacteria;p_Planctomycetes;c_Planctomycetia               |               |                    |                  |                |                  |
| <b>Root;k_Bacteria;p_Proteobacteria;c_Alphaproteobacteria</b>   | <b>0.0049</b> | <b>0.0002</b>      | <b>0.0007</b>    | <b>-0.0005</b> | <b>0.0002</b>    |
| Root;k_Bacteria;p_Proteobacteria;c_Betaproteobacteria           | 0.7782        | 0.0179             | 0.0156           | 0.0024         | 0.0082           |
| Root;k_Bacteria;p_Proteobacteria;c_Deltaproteobacteria          | 0.0533        | 0.0286             | 0.0027           | 0.0259         | 0.0122           |
| <b>Root;k_Bacteria;p_Proteobacteria;c_Epsilonproteobacteria</b> | <b>0.0455</b> | <b>0.0007</b>      | <b>0.0132</b>    | <b>-0.0124</b> | <b>0.0056</b>    |
| Root;k_Bacteria;p_Proteobacteria;c_Gammaproteobacteria          | 0.6277        | 0.0018             | 0.0005           | 0.0013         | 0.0027           |
| Root;k_Bacteria;p_TM7;c_TM7-3                                   | 0.3724        | 0.0001             | 0.0000           | 0.0001         | 0.0001           |
| Root;k_Bacteria;p_Tenericutes;c_Mollicutes                      | 0.9249        | 0.0023             | 0.0024           | -0.0001        | 0.0013           |
| Root;k_Bacteria;p_Verrucomicrobia;c_Verrucomicrobiae            | 0.8590        | 0.0744             | 0.0614           | 0.0130         | 0.0719           |

| Order level                                                              | P value | Mean water-treated | Mean P80-treated | Difference | SE of difference |
|--------------------------------------------------------------------------|---------|--------------------|------------------|------------|------------------|
| Root;k_Bacteria;p_Actinobacteria;c_Actinobacteria;o_Actinomycetales      | 0.5000  | 0.0000             | 0.0000           | 0.0000     | 0.0000           |
| Root;k_Bacteria;p_Actinobacteria;c_Actinobacteria;o_Bifidobacteriales    | 0.4631  | 0.0018             | 0.0044           | -0.0027    | 0.0035           |
| Root;k_Bacteria;p_Actinobacteria;c_Thermoleophilia;o_Solirubrobacterales |         |                    |                  |            |                  |
| Root;k_Bacteria;p_Bacteroidetes;c_Bacteroidia;o_Bacteroidales            | 0.1648  | 0.3847             | 0.5016           | -0.1169    | 0.0794           |
| Root;k_Bacteria;p_Bacteroidetes;c_Flavobacteriia;o_Flavobacteriales      |         |                    |                  |            |                  |
| Root;k_Bacteria;p_Bacteroidetes;c_Sphingobacteriia;o_Sphingobacteriales  |         |                    |                  |            |                  |

|                                                                                      |               |               |               |                |               |
|--------------------------------------------------------------------------------------|---------------|---------------|---------------|----------------|---------------|
| Root;k_Bacteria;p_Cyanobacteria;c_4C0d-2;o_YS2                                       | 0.1172        | 0.0002        | 0.0026        | -0.0024        | 0.0014        |
| Root;k_Bacteria;p_Cyanobacteria;c_Chloroplast;o_Streptophyta                         | 0.1391        | 0.0002        | 0.0005        | -0.0002        | 0.0001        |
| Root;k_Bacteria;p_Deferribacteres;c_Deferribacteres;o_Deferribacterales              |               |               |               |                |               |
| Root;k_Bacteria;p_Firmicutes;c_Bacilli;o_                                            |               |               |               |                |               |
| Root;k_Bacteria;p_Firmicutes;c_Bacilli;o_Bacillales                                  | 0.8144        | 0.0000        | 0.0000        | 0.0000         | 0.0000        |
| <b>Root;k_Bacteria;p_Firmicutes;c_Bacilli;o_Lactobacillales</b>                      | <b>0.0278</b> | <b>0.1599</b> | <b>0.0735</b> | <b>0.0864</b>  | <b>0.0349</b> |
| Root;k_Bacteria;p_Firmicutes;c_Bacilli;o_Turicibacterales                            | 0.2013        | 0.0014        | 0.0053        | -0.0039        | 0.0029        |
| Root;k_Bacteria;p_Firmicutes;c_Clostridia;o_                                         | 0.1778        | 0.0091        | 0.0189        | -0.0098        | 0.0069        |
| Root;k_Bacteria;p_Firmicutes;c_Clostridia;o_Clostridiales                            | 0.9190        | 0.2796        | 0.2725        | 0.0070         | 0.0679        |
| <b>Root;k_Bacteria;p_Firmicutes;c_Clostridia;o_Coriobacteriales</b>                  | <b>0.0479</b> | <b>0.0067</b> | <b>0.0024</b> | <b>0.0042</b>  | <b>0.0019</b> |
| Root;k_Bacteria;p_Firmicutes;c_Erysipelotrichi;o_Erysipelotrichales                  | 0.5150        | 0.0303        | 0.0217        | 0.0086         | 0.0129        |
| Root;k_Bacteria;p_Planctomycetes;c_Planctomycetia;o_Gemmatales                       |               |               |               |                |               |
| Root;k_Bacteria;p_Planctomycetes;c_Planctomycetia;o_Pirellulales                     |               |               |               |                |               |
| Root;k_Bacteria;p_Planctomycetes;c_Planctomycetia;o_Planctomycetales                 |               |               |               |                |               |
| Root;k_Bacteria;p_Proteobacteria;c_Alphaproteobacteria;o_                            |               |               |               |                |               |
| Root;k_Bacteria;p_Proteobacteria;c_Alphaproteobacteria;o_RF32                        | 0.1648        | 0.0000        | 0.0001        | -0.0001        | 0.0001        |
| Root;k_Bacteria;p_Proteobacteria;c_Alphaproteobacteria;o_Rhizobiales                 | 0.7600        | 0.0000        | 0.0000        | 0.0000         | 0.0000        |
| Root;k_Bacteria;p_Proteobacteria;c_Alphaproteobacteria;o_Rhodobacterales             |               |               |               |                |               |
| Root;k_Bacteria;p_Proteobacteria;c_Alphaproteobacteria;o_Rickettsiales               | 0.0740        | 0.0002        | 0.0005        | -0.0004        | 0.0002        |
| Root;k_Bacteria;p_Proteobacteria;c_Alphaproteobacteria;o_Sphingomonadales            |               |               |               |                |               |
| Root;k_Bacteria;p_Proteobacteria;c_Betaproteobacteria;o_Burkholderiales              | 0.7782        | 0.0179        | 0.0156        | 0.0024         | 0.0082        |
| Root;k_Bacteria;p_Proteobacteria;c_Betaproteobacteria;o_Methylophilales              |               |               |               |                |               |
| Root;k_Bacteria;p_Proteobacteria;c_Betaproteobacteria;o_Rhodocyclales                |               |               |               |                |               |
| Root;k_Bacteria;p_Proteobacteria;c_Deltaproteobacteria;o_Desulfovibrionales          | 0.0533        | 0.0286        | 0.0027        | 0.0259         | 0.0122        |
| Root;k_Bacteria;p_Proteobacteria;c_Deltaproteobacteria;o_Myxococcales                |               |               |               |                |               |
| Root;k_Bacteria;p_Proteobacteria;c_Deltaproteobacteria;o_Spirobacillales             |               |               |               |                |               |
| <b>Root;k_Bacteria;p_Proteobacteria;c_Epsilonproteobacteria;o_Campylobacteriales</b> | <b>0.0455</b> | <b>0.0007</b> | <b>0.0132</b> | <b>-0.0124</b> | <b>0.0056</b> |
| Root;k_Bacteria;p_Proteobacteria;c_Gammaproteobacteria;o_Aeromonadales               |               |               |               |                |               |
| Root;k_Bacteria;p_Proteobacteria;c_Gammaproteobacteria;o_Enterobacteriales           | 0.6347        | 0.0017        | 0.0005        | 0.0012         | 0.0025        |
| Root;k_Bacteria;p_Proteobacteria;c_Gammaproteobacteria;o_Pasteurellales              | 0.5000        | 0.0001        | 0.0000        | 0.0001         | 0.0001        |
| Root;k_Bacteria;p_Proteobacteria;c_Gammaproteobacteria;o_Pseudomonadales             | 0.5000        | 0.0000        | 0.0000        | 0.0000         | 0.0000        |
| Root;k_Bacteria;p_Proteobacteria;c_Gammaproteobacteria;o_Xanthomonadales             |               |               |               |                |               |
| Root;k_Bacteria;p_TM7;c_TM7-3;o_CW040                                                | 0.3724        | 0.0001        | 0.0000        | 0.0001         | 0.0001        |
| Root;k_Bacteria;p_Tenericutes;c_Mollicutes;o_Acholeplasmatales                       | 0.1648        | 0.0000        | 0.0000        | 0.0000         | 0.0000        |
| Root;k_Bacteria;p_Tenericutes;c_Mollicutes;o_Anaeroplasmatales                       | 0.0791        | 0.0001        | 0.0017        | -0.0016        | 0.0008        |
| Root;k_Bacteria;p_Tenericutes;c_Mollicutes;o_Mycoplasmatales                         |               |               |               |                |               |
| Root;k_Bacteria;p_Tenericutes;c_Mollicutes;o_RF39                                    | 0.2017        | 0.0022        | 0.0007        | 0.0015         | 0.0011        |
| Root;k_Bacteria;p_Verrucomicrobia;c_Verrucomicrobiae;o_Verrucomicrobiales            | 0.8590        | 0.0744        | 0.0614        | 0.0130         | 0.0719        |

| Family level                                                                            | P value | Mean water-treated | Mean P80-treated | Difference | SE of difference |
|-----------------------------------------------------------------------------------------|---------|--------------------|------------------|------------|------------------|
| Root;k_Bacteria;p_Actinobacteria;c_Actinobacteria;o_Actinomycetales;f_                  |         |                    |                  |            |                  |
| Root;k_Bacteria;p_Actinobacteria;c_Actinobacteria;o_Actinomycetales;f_ACK-M1            |         |                    |                  |            |                  |
| Root;k_Bacteria;p_Actinobacteria;c_Actinobacteria;o_Actinomycetales;f_Brevibacteriaceae |         |                    |                  |            |                  |



|                                                                                                 |               |               |               |                |               |
|-------------------------------------------------------------------------------------------------|---------------|---------------|---------------|----------------|---------------|
| Root;k_Bacteria;p_Actinobacteria;c_Actinobacteria;o_Actinomycetales;f_Corynebacteriaceae        | 0.5000        | 0.0000        | 0.0000        | 0.0000         | 0.0000        |
| Root;k_Bacteria;p_Actinobacteria;c_Actinobacteria;o_Actinomycetales;f_Dermabacteraceae          |               |               |               |                |               |
| Root;k_Bacteria;p_Actinobacteria;c_Actinobacteria;o_Actinomycetales;f_Frankiaceae               |               |               |               |                |               |
| Root;k_Bacteria;p_Actinobacteria;c_Actinobacteria;o_Actinomycetales;f_Kineosporiaceae           |               |               |               |                |               |
| Root;k_Bacteria;p_Actinobacteria;c_Actinobacteria;o_Actinomycetales;f_Microbacteriaceae         |               |               |               |                |               |
| Root;k_Bacteria;p_Actinobacteria;c_Actinobacteria;o_Actinomycetales;f_Micrococcaceae            |               |               |               |                |               |
| Root;k_Bacteria;p_Actinobacteria;c_Actinobacteria;o_Actinomycetales;f_Nocardiaceae              |               |               |               |                |               |
| Root;k_Bacteria;p_Actinobacteria;c_Actinobacteria;o_Actinomycetales;f_Promicromonosporaceae     |               |               |               |                |               |
| Root;k_Bacteria;p_Actinobacteria;c_Actinobacteria;o_Actinomycetales;f_Streptomycetaceae         |               |               |               |                |               |
| Root;k_Bacteria;p_Actinobacteria;c_Actinobacteria;o_Bifidobacteriales;f_                        |               |               |               |                |               |
| Root;k_Bacteria;p_Actinobacteria;c_Actinobacteria;o_Bifidobacteriales;f_Bifidobacteriaceae      | 0.4631        | 0.0018        | 0.0044        | -0.0027        | 0.0035        |
| Root;k_Bacteria;p_Actinobacteria;c_Thermoleophilia;o_Solirubrobacterales;f_Solirubrobacteraceae |               |               |               |                |               |
| Root;k_Bacteria;p_Bacteroidetes;c_Bacteroidia;o_Bacteroidales;f_                                | 0.5000        | 0.0000        | 0.0000        | 0.0000         | 0.0000        |
| <b>Root;k_Bacteria;p_Bacteroidetes;c_Bacteroidia;o_Bacteroidales;f_Bacteroidaceae</b>           | <b>0.0102</b> | <b>0.0427</b> | <b>0.1807</b> | <b>-0.1379</b> | <b>0.0460</b> |
| Root;k_Bacteria;p_Bacteroidetes;c_Bacteroidia;o_Bacteroidales;f_Porphyrimonadaceae              | 0.1364        | 0.0056        | 0.0193        | -0.0138        | 0.0087        |
| Root;k_Bacteria;p_Bacteroidetes;c_Bacteroidia;o_Bacteroidales;f_Prevotellaceae                  | 0.0696        | 0.0020        | 0.0093        | -0.0073        | 0.0037        |
| Root;k_Bacteria;p_Bacteroidetes;c_Bacteroidia;o_Bacteroidales;f_Rikenellaceae                   | 0.1141        | 0.0149        | 0.0486        | -0.0337        | 0.0199        |
| Root;k_Bacteria;p_Bacteroidetes;c_Bacteroidia;o_Bacteroidales;f_S24-7                           | 0.3087        | 0.3187        | 0.2416        | 0.0770         | 0.0727        |
| Root;k_Bacteria;p_Bacteroidetes;c_Bacteroidia;o_Bacteroidales;f_[Odoribacteraceae]              | 0.4219        | 0.0008        | 0.0021        | -0.0012        | 0.0015        |
| Root;k_Bacteria;p_Bacteroidetes;c_Flavobacteriia;o_Flavobacteriales;f_Cryomorphaceae            |               |               |               |                |               |
| Root;k_Bacteria;p_Bacteroidetes;c_Flavobacteriia;o_Flavobacteriales;f_Flavobacteriaceae         |               |               |               |                |               |
| Root;k_Bacteria;p_Bacteroidetes;c_Sphingobacteriia;o_Sphingobacteriales;f_                      |               |               |               |                |               |
| Root;k_Bacteria;p_Bacteroidetes;c_Sphingobacteriia;o_Sphingobacteriales;f_Chitinophagaceae      |               |               |               |                |               |
| Root;k_Bacteria;p_Bacteroidetes;c_Sphingobacteriia;o_Sphingobacteriales;f_Flexibacteraceae      |               |               |               |                |               |
| Root;k_Bacteria;p_Cyanobacteria;c_4C0d-2;o_YS2;f_                                               | 0.1172        | 0.0002        | 0.0026        | -0.0024        | 0.0014        |
| Root;k_Bacteria;p_Cyanobacteria;c_Chloroplast;o_Streptophyta;f_                                 | 0.1391        | 0.0002        | 0.0005        | -0.0002        | 0.0001        |
| Root;k_Bacteria;p_Deferribacteres;c_Deferribacteres;o_Deferribacterales;f_Deferribacteraceae    |               |               |               |                |               |
| Root;k_Bacteria;p_Firmicutes;c_Bacilli;o_ ;f_                                                   |               |               |               |                |               |
| Root;k_Bacteria;p_Firmicutes;c_Bacilli;o_Bacillales;f_                                          |               |               |               |                |               |
| Root;k_Bacteria;p_Firmicutes;c_Bacilli;o_Bacillales;f_Alicyclobacillaceae                       |               |               |               |                |               |
| Root;k_Bacteria;p_Firmicutes;c_Bacilli;o_Bacillales;f_Bacillaceae                               | 0.1648        | 0.0000        | 0.0000        | 0.0000         | 0.0000        |
| Root;k_Bacteria;p_Firmicutes;c_Bacilli;o_Bacillales;f_Paenibacillaceae                          |               |               |               |                |               |
| Root;k_Bacteria;p_Firmicutes;c_Bacilli;o_Bacillales;f_Planococcaceae                            |               |               |               |                |               |
| Root;k_Bacteria;p_Firmicutes;c_Bacilli;o_Bacillales;f_Staphylococcaceae                         | 0.5000        | 0.0000        | 0.0000        | 0.0000         | 0.0000        |
| Root;k_Bacteria;p_Firmicutes;c_Bacilli;o_Bacillales;f_Thermoactinomycetaceae                    |               |               |               |                |               |
| Root;k_Bacteria;p_Firmicutes;c_Bacilli;o_Lactobacillales;f_                                     |               |               |               |                |               |
| Root;k_Bacteria;p_Firmicutes;c_Bacilli;o_Lactobacillales;f_Aerococcaceae                        |               |               |               |                |               |
| Root;k_Bacteria;p_Firmicutes;c_Bacilli;o_Lactobacillales;f_Carnobacteriaceae                    | 0.3283        | 0.0000        | 0.0000        | 0.0000         | 0.0000        |
| Root;k_Bacteria;p_Firmicutes;c_Bacilli;o_Lactobacillales;f_Enterococcaceae                      | 0.1608        | 0.0000        | 0.0003        | -0.0002        | 0.0002        |
| <b>Root;k_Bacteria;p_Firmicutes;c_Bacilli;o_Lactobacillales;f_Lactobacillaceae</b>              | <b>0.0279</b> | <b>0.1594</b> | <b>0.0732</b> | <b>0.0862</b>  | <b>0.0348</b> |
| Root;k_Bacteria;p_Firmicutes;c_Bacilli;o_Lactobacillales;f_Leuconostocaceae                     |               |               |               |                |               |
| <b>Root;k_Bacteria;p_Firmicutes;c_Bacilli;o_Lactobacillales;f_Streptococcaceae</b>              | <b>0.0174</b> | <b>0.0005</b> | <b>0.0001</b> | <b>0.0004</b>  | <b>0.0002</b> |
| Root;k_Bacteria;p_Firmicutes;c_Bacilli;o_Turicibacterales;f_Turicibacteraceae                   | 0.2013        | 0.0014        | 0.0053        | -0.0039        | 0.0029        |

Chassaing et al, Supplemental Table 1.

|                                                                                                          |               |               |               |                |               |
|----------------------------------------------------------------------------------------------------------|---------------|---------------|---------------|----------------|---------------|
| Root;k_Bacteria;p_Firmicutes;c_Clostridia;o_ ;f_                                                         | 0.1778        | 0.0091        | 0.0189        | -0.0098        | 0.0069        |
| Root;k_Bacteria;p_Firmicutes;c_Clostridia;o_Clostridiales;f_                                             | 0.4738        | 0.0018        | 0.0025        | -0.0007        | 0.0010        |
| Root;k_Bacteria;p_Firmicutes;c_Clostridia;o_Clostridiales;f_Clostridiaceae                               | 0.7667        | 0.0195        | 0.0114        | 0.0081         | 0.0266        |
| Root;k_Bacteria;p_Firmicutes;c_Clostridia;o_Clostridiales;f_Dehalobacteriaceae                           | 0.1526        | 0.0008        | 0.0002        | 0.0005         | 0.0004        |
| Root;k_Bacteria;p_Firmicutes;c_Clostridia;o_Clostridiales;f_Eubacteriaceae                               |               |               |               |                |               |
| Root;k_Bacteria;p_Firmicutes;c_Clostridia;o_Clostridiales;f_Lachnospiraceae                              | 0.8991        | 0.2038        | 0.1954        | 0.0084         | 0.0650        |
| Root;k_Bacteria;p_Firmicutes;c_Clostridia;o_Clostridiales;f_Peptococcaceae                               | 0.3227        | 0.0000        | 0.0000        | 0.0000         | 0.0000        |
| Root;k_Bacteria;p_Firmicutes;c_Clostridia;o_Clostridiales;f_Peptostreptococcaceae                        | 0.2069        | 0.0020        | 0.0149        | -0.0129        | 0.0097        |
| Root;k_Bacteria;p_Firmicutes;c_Clostridia;o_Clostridiales;f_Ruminococcaceae                              | 0.8451        | 0.0518        | 0.0481        | 0.0037         | 0.0183        |
| Root;k_Bacteria;p_Firmicutes;c_Clostridia;o_Coriobacteriales;f_                                          | 0.1807        | 0.0039        | 0.0015        | 0.0024         | 0.0017        |
| <b>Root;k_Bacteria;p_Firmicutes;c_Clostridia;o_Coriobacteriales;f_Coriobacteriaceae</b>                  | <b>0.0337</b> | <b>0.0028</b> | <b>0.0009</b> | <b>0.0018</b>  | <b>0.0008</b> |
| Root;k_Bacteria;p_Firmicutes;c_Erysipelotrichi;o_Erysipelotrichales;f_Erysipelotrichaceae                | 0.2129        | 0.0270        | 0.0099        | 0.0171         | 0.0131        |
| Root;k_Bacteria;p_Firmicutes;c_Erysipelotrichi;o_Erysipelotrichales;f_[Coprobacillaceae]                 | 0.1488        | 0.0033        | 0.0118        | -0.0085        | 0.0055        |
| Root;k_Bacteria;p_Planctomycetes;c_Planctomycetia;o_Gemmatales;f_Gemmataceae                             |               |               |               |                |               |
| Root;k_Bacteria;p_Planctomycetes;c_Planctomycetia;o_Pirellulales;f_Pirellulaceae                         |               |               |               |                |               |
| Root;k_Bacteria;p_Planctomycetes;c_Planctomycetia;o_Planctomycetales;f_Planctomycetaceae                 |               |               |               |                |               |
| Root;k_Bacteria;p_Proteobacteria;c_Alphaproteobacteria;o_ ;f_                                            |               |               |               |                |               |
| Root;k_Bacteria;p_Proteobacteria;c_Alphaproteobacteria;o_RF32;f_                                         | 0.1648        | 0.0000        | 0.0001        | -0.0001        | 0.0001        |
| Root;k_Bacteria;p_Proteobacteria;c_Alphaproteobacteria;o_Rhizobiales;f_Brucellaceae                      | 0.5000        | 0.0000        | 0.0000        | 0.0000         | 0.0000        |
| Root;k_Bacteria;p_Proteobacteria;c_Alphaproteobacteria;o_Rhizobiales;f_Hyphomicrobiaceae                 | 0.5000        | 0.0000        | 0.0000        | 0.0000         | 0.0000        |
| Root;k_Bacteria;p_Proteobacteria;c_Alphaproteobacteria;o_Rhizobiales;f_Methylobacteriaceae               |               |               |               |                |               |
| Root;k_Bacteria;p_Proteobacteria;c_Alphaproteobacteria;o_Rhizobiales;f_Rhizobiaceae                      | 0.1648        | 0.0000        | 0.0000        | 0.0000         | 0.0000        |
| Root;k_Bacteria;p_Proteobacteria;c_Alphaproteobacteria;o_Rhodobacterales;f_Rhodobacteraceae              |               |               |               |                |               |
| Root;k_Bacteria;p_Proteobacteria;c_Alphaproteobacteria;o_Rickettsiales;f_mitochondria                    | 0.0740        | 0.0002        | 0.0005        | -0.0004        | 0.0002        |
| Root;k_Bacteria;p_Proteobacteria;c_Alphaproteobacteria;o_Sphingomonadales;f_Sphingomonadaceae            |               |               |               |                |               |
| Root;k_Bacteria;p_Proteobacteria;c_Betaproteobacteria;o_Burkholderiales;f_Alcaligenaceae                 | 0.7789        | 0.0179        | 0.0156        | 0.0024         | 0.0082        |
| Root;k_Bacteria;p_Proteobacteria;c_Betaproteobacteria;o_Burkholderiales;f_Burkholderiaceae               |               |               |               |                |               |
| Root;k_Bacteria;p_Proteobacteria;c_Betaproteobacteria;o_Burkholderiales;f_Comamonadaceae                 |               |               |               |                |               |
| Root;k_Bacteria;p_Proteobacteria;c_Betaproteobacteria;o_Burkholderiales;f_Oxalobacteraceae               | 0.5000        | 0.0000        | 0.0000        | 0.0000         | 0.0000        |
| Root;k_Bacteria;p_Proteobacteria;c_Betaproteobacteria;o_Methylophilales;f_Methylophilaceae               |               |               |               |                |               |
| Root;k_Bacteria;p_Proteobacteria;c_Betaproteobacteria;o_Rhodocyclales;f_Rhodocyclaceae                   |               |               |               |                |               |
| Root;k_Bacteria;p_Proteobacteria;c_Deltaproteobacteria;o_Desulfovibrionales;f_Desulfovibrionaceae        | 0.0533        | 0.0286        | 0.0027        | 0.0259         | 0.0122        |
| Root;k_Bacteria;p_Proteobacteria;c_Deltaproteobacteria;o_Myxococcales;f_                                 |               |               |               |                |               |
| Root;k_Bacteria;p_Proteobacteria;c_Deltaproteobacteria;o_Myxococcales;f_Nannocystaceae                   |               |               |               |                |               |
| Root;k_Bacteria;p_Proteobacteria;c_Deltaproteobacteria;o_Spirobacillales;f_                              |               |               |               |                |               |
| <b>Root;k_Bacteria;p_Proteobacteria;c_Epsilonproteobacteria;o_Campylobacteriales;f_Helicobacteraceae</b> | <b>0.0455</b> | <b>0.0007</b> | <b>0.0132</b> | <b>-0.0124</b> | <b>0.0056</b> |
| Root;k_Bacteria;p_Proteobacteria;c_Gammaproteobacteria;o_Aeromonadales;f_                                |               |               |               |                |               |
| Root;k_Bacteria;p_Proteobacteria;c_Gammaproteobacteria;o_Aeromonadales;f_Aeromonadaceae                  |               |               |               |                |               |
| Root;k_Bacteria;p_Proteobacteria;c_Gammaproteobacteria;o_Enterobacteriales;f_Enterobacteriaceae          | 0.6347        | 0.0017        | 0.0005        | 0.0012         | 0.0025        |
| Root;k_Bacteria;p_Proteobacteria;c_Gammaproteobacteria;o_Pasteurellales;f_Pasteurellaceae                | 0.5000        | 0.0001        | 0.0000        | 0.0001         | 0.0001        |
| Root;k_Bacteria;p_Proteobacteria;c_Gammaproteobacteria;o_Pseudomonadales;f_Moraxellaceae                 |               |               |               |                |               |
| Root;k_Bacteria;p_Proteobacteria;c_Gammaproteobacteria;o_Pseudomonadales;f_Pseudomonadaceae              | 0.5000        | 0.0000        | 0.0000        | 0.0000         | 0.0000        |
| Root;k_Bacteria;p_Proteobacteria;c_Gammaproteobacteria;o_Xanthomonadales;f_Xanthomonadaceae              |               |               |               |                |               |

Chassaing et al, Supplemental Table 1.

|                                                                                                      |        |        |        |         |        |
|------------------------------------------------------------------------------------------------------|--------|--------|--------|---------|--------|
| Root;k__Bacteria;p__TM7;c__TM7-3;o__CW040;f__F16                                                     | 0.3724 | 0.0001 | 0.0000 | 0.0001  | 0.0001 |
| Root;k__Bacteria;p__Tenericutes;c__Mollicutes;o__Acholeplasmatales;f__Acholeplasmataceae             | 0.1648 | 0.0000 | 0.0000 | 0.0000  | 0.0000 |
| Root;k__Bacteria;p__Tenericutes;c__Mollicutes;o__Anaeroplasmatales;f__Anaeroplasmataceae             | 0.0791 | 0.0001 | 0.0017 | -0.0016 | 0.0008 |
| Root;k__Bacteria;p__Tenericutes;c__Mollicutes;o__Mycoplasmatales;f__Mycoplasmataceae                 |        |        |        |         |        |
| Root;k__Bacteria;p__Tenericutes;c__Mollicutes;o__RF39;f__                                            | 0.2017 | 0.0022 | 0.0007 | 0.0015  | 0.0011 |
| Root;k__Bacteria;p__Verrucomicrobia;c__Verrucomicrobiae;o__Verrucomicrobiales;f__Verrucomicrobiaceae | 0.8590 | 0.0744 | 0.0614 | 0.0130  | 0.0719 |

## IL10<sup>-/-</sup> water versus IL10<sup>-/-</sup> P80 - Mucosa Associated Bacteria

| Phyla level                             | P value       | Mean water-treated | Mean P80-treated | Difference     | SE of difference |
|-----------------------------------------|---------------|--------------------|------------------|----------------|------------------|
| <b>Root;k_Bacteria;p_Actinobacteria</b> | <b>0.0196</b> | <b>0.0000</b>      | <b>0.0014</b>    | <b>-0.0014</b> | <b>0.0005</b>    |
| Root;k_Bacteria;p_Bacteroidetes         | 0.2122        | 0.3125             | 0.2121           | 0.1004         | 0.0762           |
| <b>Root;k_Bacteria;p_Cyanobacteria</b>  | <b>0.0056</b> | <b>0.0058</b>      | <b>0.0005</b>    | <b>0.0053</b>  | <b>0.0016</b>    |
| Root;k_Bacteria;p_Deferribacteres       |               |                    |                  |                |                  |
| Root;k_Bacteria;p_Firmicutes            | 0.3653        | 0.6295             | 0.5368           | 0.0927         | 0.0985           |
| Root;k_Bacteria;p_Planctomycetes        |               |                    |                  |                |                  |
| <b>Root;k_Bacteria;p_Proteobacteria</b> | <b>0.0143</b> | <b>0.0268</b>      | <b>0.2183</b>    | <b>-0.1915</b> | <b>0.0669</b>    |
| Root;k_Bacteria;p_TM7                   | 0.9546        | 0.0000             | 0.0000           | 0.0000         | 0.0001           |
| Root;k_Bacteria;p_Tenericutes           | 0.4148        | 0.0054             | 0.0033           | 0.0021         | 0.0025           |
| Root;k_Bacteria;p_Verrucomicrobia       | 0.6816        | 0.0199             | 0.0275           | -0.0076        | 0.0181           |

| Class level                                                 | P value            | Mean water-treated | Mean P80-treated | Difference     | SE of difference |
|-------------------------------------------------------------|--------------------|--------------------|------------------|----------------|------------------|
| Root;k_Bacteria;p_Actinobacteria;c_Actinobacteria           | 0.4408             | 0.0011             | 0.0005           | 0.0005         | 0.0007           |
| Root;k_Bacteria;p_Actinobacteria;c_Thermoleophilia          |                    |                    |                  |                |                  |
| Root;k_Bacteria;p_Bacteroidetes;c_Bacteroidia               | 0.3214             | 0.2187             | 0.2776           | -0.0588        | 0.0569           |
| Root;k_Bacteria;p_Bacteroidetes;c_Flavobacteriia            | 0.3010             | 0.0001             | 0.0000           | 0.0001         | 0.0001           |
| Root;k_Bacteria;p_Bacteroidetes;c_Sphingobacteriia          | 0.2927             | 0.0001             | 0.0000           | 0.0001         | 0.0001           |
| Root;k_Bacteria;p_Cyanobacteria;c_4C0d-2                    | 0.6463             | 0.0036             | 0.0046           | -0.0010        | 0.0022           |
| Root;k_Bacteria;p_Cyanobacteria;c_Chloroplast               | 0.5016             | 0.0006             | 0.0000           | 0.0006         | 0.0009           |
| Root;k_Bacteria;p_Deferribacteres;c_Deferribacteres         |                    |                    |                  |                |                  |
| Root;k_Bacteria;p_Firmicutes;c_Bacilli                      | 0.0867             | 0.0084             | 0.0134           | -0.0050        | 0.0027           |
| Root;k_Bacteria;p_Firmicutes;c_Clostridia                   | 0.4581             | 0.5586             | 0.4675           | 0.0911         | 0.1189           |
| Root;k_Bacteria;p_Firmicutes;c_Erysipelotrichi              | 0.4365             | 0.0069             | 0.0122           | -0.0053        | 0.0066           |
| Root;k_Bacteria;p_Planctomycetes;c_Planctomycetia           |                    |                    |                  |                |                  |
| Root;k_Bacteria;p_Proteobacteria;c_Alphaproteobacteria      | 0.5559             | 0.0007             | 0.0012           | -0.0004        | 0.0007           |
| Root;k_Bacteria;p_Proteobacteria;c_Betaproteobacteria       | 0.2404             | 0.0081             | 0.0147           | -0.0067        | 0.0054           |
| Root;k_Bacteria;p_Proteobacteria;c_Deltaproteobacteria      | 0.7367             | 0.0100             | 0.0118           | -0.0018        | 0.0053           |
| Root;k_Bacteria;p_Proteobacteria;c_Epsilonproteobacteria    | 0.5802             | 0.0307             | 0.0527           | -0.0220        | 0.0388           |
| Root;k_Bacteria;p_Proteobacteria;c_Gammaproteobacteria      | 0.5951             | 0.1423             | 0.0764           | 0.0659         | 0.1208           |
| Root;k_Bacteria;p_TM7;c_TM7-3                               | 0.9546             | 0.0000             | 0.0000           | 0.0000         | 0.0001           |
| Root;k_Bacteria;p_Tenericutes;c_Mollicutes                  | 0.1193             | 0.0058             | 0.0020           | 0.0038         | 0.0023           |
| <b>Root;k_Bacteria;p_Verrucomicrobia;c_Verrucomicrobiae</b> | <b>&lt; 0.0001</b> | <b>0.0043</b>      | <b>0.0654</b>    | <b>-0.0610</b> | <b>0.0094</b>    |

| Order level                                                              | P value | Mean water-treated | Mean P80-treated | Difference | SE of difference |
|--------------------------------------------------------------------------|---------|--------------------|------------------|------------|------------------|
| Root;k_Bacteria;p_Actinobacteria;c_Actinobacteria;o_Actinomycetales      | 0.5840  | 0.0000             | 0.0001           | -0.0001    | 0.0001           |
| Root;k_Bacteria;p_Actinobacteria;c_Actinobacteria;o_Bifidobacteriales    | 0.3696  | 0.0010             | 0.0004           | 0.0006     | 0.0006           |
| Root;k_Bacteria;p_Actinobacteria;c_Thermoleophilia;o_Solirubrobacterales |         |                    |                  |            |                  |
| Root;k_Bacteria;p_Bacteroidetes;c_Bacteroidia;o_Bacteroidales            | 0.3214  | 0.2187             | 0.2776           | -0.0588    | 0.0569           |
| Root;k_Bacteria;p_Bacteroidetes;c_Flavobacteriia;o_Flavobacteriales      | 0.3010  | 0.0001             | 0.0000           | 0.0001     | 0.0001           |
| Root;k_Bacteria;p_Bacteroidetes;c_Sphingobacteriia;o_Sphingobacteriales  | 0.2927  | 0.0001             | 0.0000           | 0.0001     | 0.0001           |

|                                                                                  |                    |               |               |                |               |
|----------------------------------------------------------------------------------|--------------------|---------------|---------------|----------------|---------------|
| Root;k_Bacteria;p_Cyanobacteria;c_4C0d-2;o_YS2                                   | 0.6463             | 0.0036        | 0.0046        | -0.0010        | 0.0022        |
| Root;k_Bacteria;p_Cyanobacteria;c_Chloroplast;o_Streptophyta                     | 0.5016             | 0.0006        | 0.0000        | 0.0006         | 0.0009        |
| Root;k_Bacteria;p_Deferribacteres;c_Deferribacteres;o_Deferribacterales          |                    |               |               |                |               |
| Root;k_Bacteria;p_Firmicutes;c_Bacilli;o_                                        |                    |               |               |                |               |
| Root;k_Bacteria;p_Firmicutes;c_Bacilli;o_Bacillales                              |                    |               |               |                |               |
| <b>Root;k_Bacteria;p_Firmicutes;c_Bacilli;o_Lactobacillales</b>                  | <b>0.0405</b>      | <b>0.0074</b> | <b>0.0130</b> | <b>-0.0056</b> | <b>0.0024</b> |
| Root;k_Bacteria;p_Firmicutes;c_Bacilli;o_Turicibacterales                        | 0.5736             | 0.0010        | 0.0004        | 0.0006         | 0.0011        |
| Root;k_Bacteria;p_Firmicutes;c_Clostridia;o_                                     | 0.7214             | 0.0167        | 0.0194        | -0.0027        | 0.0074        |
| Root;k_Bacteria;p_Firmicutes;c_Clostridia;o_Clostridiales                        | 0.4508             | 0.5323        | 0.4442        | 0.0881         | 0.1131        |
| Root;k_Bacteria;p_Firmicutes;c_Clostridia;o_Coriobacteriales                     | 0.0842             | 0.0096        | 0.0039        | 0.0057         | 0.0030        |
| Root;k_Bacteria;p_Firmicutes;c_Erysipelotrichi;o_Erysipelotrichales              | 0.4365             | 0.0069        | 0.0122        | -0.0053        | 0.0066        |
| Root;k_Bacteria;p_Planctomycetes;c_Planctomycetia;o_Gemmatales                   |                    |               |               |                |               |
| Root;k_Bacteria;p_Planctomycetes;c_Planctomycetia;o_Pirellulales                 |                    |               |               |                |               |
| Root;k_Bacteria;p_Planctomycetes;c_Planctomycetia;o_Planctomycetales             |                    |               |               |                |               |
| Root;k_Bacteria;p_Proteobacteria;c_Alphaproteobacteria;o_                        | 0.2086             | 0.0000        | 0.0002        | -0.0001        | 0.0001        |
| Root;k_Bacteria;p_Proteobacteria;c_Alphaproteobacteria;o_RF32                    | 0.5078             | 0.0005        | 0.0010        | -0.0005        | 0.0007        |
| Root;k_Bacteria;p_Proteobacteria;c_Alphaproteobacteria;o_Rhizobiales             | 0.4783             | 0.0000        | 0.0000        | 0.0000         | 0.0000        |
| Root;k_Bacteria;p_Proteobacteria;c_Alphaproteobacteria;o_Rhodobacterales         |                    |               |               |                |               |
| Root;k_Bacteria;p_Proteobacteria;c_Alphaproteobacteria;o_Rickettsiales           | 0.4783             | 0.0001        | 0.0000        | 0.0001         | 0.0001        |
| Root;k_Bacteria;p_Proteobacteria;c_Alphaproteobacteria;o_Sphingomonadales        | 0.4783             | 0.0000        | 0.0000        | 0.0000         | 0.0000        |
| Root;k_Bacteria;p_Proteobacteria;c_Betaproteobacteria;o_Burkholderiales          | 0.2404             | 0.0081        | 0.0147        | -0.0067        | 0.0054        |
| Root;k_Bacteria;p_Proteobacteria;c_Betaproteobacteria;o_Methylophilales          |                    |               |               |                |               |
| Root;k_Bacteria;p_Proteobacteria;c_Betaproteobacteria;o_Rhodocyclales            |                    |               |               |                |               |
| Root;k_Bacteria;p_Proteobacteria;c_Deltaproteobacteria;o_Desulfovibrionales      | 0.7340             | 0.0100        | 0.0118        | -0.0019        | 0.0053        |
| Root;k_Bacteria;p_Proteobacteria;c_Deltaproteobacteria;o_Myxococcales            | 0.4783             | 0.0000        | 0.0000        | 0.0000         | 0.0000        |
| Root;k_Bacteria;p_Proteobacteria;c_Deltaproteobacteria;o_Spirobacillales         |                    |               |               |                |               |
| Root;k_Bacteria;p_Proteobacteria;c_Epsilonproteobacteria;o_Campylobacterales     | 0.5802             | 0.0307        | 0.0527        | -0.0220        | 0.0388        |
| Root;k_Bacteria;p_Proteobacteria;c_Gammaproteobacteria;o_Aeromonadales           | 0.2107             | 0.0002        | 0.0000        | 0.0002         | 0.0001        |
| Root;k_Bacteria;p_Proteobacteria;c_Gammaproteobacteria;o_Enterobacteriales       | 0.5970             | 0.1418        | 0.0763        | 0.0655         | 0.1207        |
| Root;k_Bacteria;p_Proteobacteria;c_Gammaproteobacteria;o_Pasteurellales          | 0.1902             | 0.0000        | 0.0000        | 0.0000         | 0.0000        |
| Root;k_Bacteria;p_Proteobacteria;c_Gammaproteobacteria;o_Pseudomonadales         | 0.4725             | 0.0003        | 0.0000        | 0.0003         | 0.0004        |
| Root;k_Bacteria;p_Proteobacteria;c_Gammaproteobacteria;o_Xanthomonadales         |                    |               |               |                |               |
| Root;k_Bacteria;p_TM7;c_TM7-3;o_CW040                                            | 0.9546             | 0.0000        | 0.0000        | 0.0000         | 0.0001        |
| Root;k_Bacteria;p_Tenericutes;c_Mollicutes;o_Acholeplasmatales                   |                    |               |               |                |               |
| Root;k_Bacteria;p_Tenericutes;c_Mollicutes;o_Anaeroplasmatales                   | 0.6933             | 0.0015        | 0.0008        | 0.0007         | 0.0017        |
| Root;k_Bacteria;p_Tenericutes;c_Mollicutes;o_Mycoplasmatales                     | 0.2846             | 0.0018        | 0.0000        | 0.0018         | 0.0016        |
| Root;k_Bacteria;p_Tenericutes;c_Mollicutes;o_RF39                                | 0.3816             | 0.0025        | 0.0012        | 0.0013         | 0.0015        |
| <b>Root;k_Bacteria;p_Verrucomicrobia;c_Verrucomicrobiae;o_Verrucomicrobiales</b> | <b>&lt; 0.0001</b> | <b>0.0043</b> | <b>0.0654</b> | <b>-0.0610</b> | <b>0.0094</b> |

| Family level                                                                            | P value | Mean water-treated | Mean P80-treated | Difference | SE of difference |
|-----------------------------------------------------------------------------------------|---------|--------------------|------------------|------------|------------------|
| Root;k_Bacteria;p_Actinobacteria;c_Actinobacteria;o_Actinomycetales;f_                  | 0.4783  | 0.0000             | 0.0000           | 0.0000     | 0.0001           |
| Root;k_Bacteria;p_Actinobacteria;c_Actinobacteria;o_Actinomycetales;f_ACK-M1            | 0.1902  | 0.0000             | 0.0001           | -0.0001    | 0.0001           |
| Root;k_Bacteria;p_Actinobacteria;c_Actinobacteria;o_Actinomycetales;f_Brevibacteriaceae |         |                    |                  |            |                  |

|                                                                                                 |               |               |               |                |               |
|-------------------------------------------------------------------------------------------------|---------------|---------------|---------------|----------------|---------------|
| Root;k_Bacteria;p_Actinobacteria;c_Actinobacteria;o_Actinomycetales;f_Corynebacteriaceae        |               |               |               |                |               |
| Root;k_Bacteria;p_Actinobacteria;c_Actinobacteria;o_Actinomycetales;f_Dermabacteraceae          |               |               |               |                |               |
| Root;k_Bacteria;p_Actinobacteria;c_Actinobacteria;o_Actinomycetales;f_Frankiaceae               |               |               |               |                |               |
| Root;k_Bacteria;p_Actinobacteria;c_Actinobacteria;o_Actinomycetales;f_Kineosporiaceae           |               |               |               |                |               |
| Root;k_Bacteria;p_Actinobacteria;c_Actinobacteria;o_Actinomycetales;f_Microbacteriaceae         |               |               |               |                |               |
| Root;k_Bacteria;p_Actinobacteria;c_Actinobacteria;o_Actinomycetales;f_Micrococcaceae            |               |               |               |                |               |
| Root;k_Bacteria;p_Actinobacteria;c_Actinobacteria;o_Actinomycetales;f_Nocardiaceae              |               |               |               |                |               |
| Root;k_Bacteria;p_Actinobacteria;c_Actinobacteria;o_Actinomycetales;f_Promicromonosporaceae     |               |               |               |                |               |
| Root;k_Bacteria;p_Actinobacteria;c_Actinobacteria;o_Actinomycetales;f_Streptomycetaceae         |               |               |               |                |               |
| Root;k_Bacteria;p_Actinobacteria;c_Actinobacteria;o_Bifidobacteriales;f_                        |               |               |               |                |               |
| Root;k_Bacteria;p_Actinobacteria;c_Actinobacteria;o_Bifidobacteriales;f_Bifidobacteriaceae      | 0.3696        | 0.0010        | 0.0004        | 0.0006         | 0.0006        |
| Root;k_Bacteria;p_Actinobacteria;c_Thermoleophilia;o_Solirubrobacterales;f_Solirubrobacteraceae |               |               |               |                |               |
| Root;k_Bacteria;p_Bacteroidetes;c_Bacteroidia;o_Bacteroidales;f_                                | 0.4372        | 0.0002        | 0.0000        | 0.0002         | 0.0003        |
| Root;k_Bacteria;p_Bacteroidetes;c_Bacteroidia;o_Bacteroidales;f_Bacteroidaceae                  | 0.5120        | 0.0307        | 0.0402        | -0.0095        | 0.0141        |
| Root;k_Bacteria;p_Bacteroidetes;c_Bacteroidia;o_Bacteroidales;f_Porphyrimonadaceae              | 0.9460        | 0.0075        | 0.0080        | -0.0005        | 0.0067        |
| <b>Root;k_Bacteria;p_Bacteroidetes;c_Bacteroidia;o_Bacteroidales;f_Prevotellaceae</b>           | <b>0.0135</b> | <b>0.0022</b> | <b>0.0137</b> | <b>-0.0115</b> | <b>0.0040</b> |
| Root;k_Bacteria;p_Bacteroidetes;c_Bacteroidia;o_Bacteroidales;f_Rikenellaceae                   | 0.3022        | 0.0360        | 0.0237        | 0.0123         | 0.0114        |
| Root;k_Bacteria;p_Bacteroidetes;c_Bacteroidia;o_Bacteroidales;f_S24-7                           | 0.3456        | 0.1321        | 0.1786        | -0.0465        | 0.0473        |
| Root;k_Bacteria;p_Bacteroidetes;c_Bacteroidia;o_Bacteroidales;f_[Odoribacteraceae]              | 0.7573        | 0.0100        | 0.0134        | -0.0034        | 0.0108        |
| Root;k_Bacteria;p_Bacteroidetes;c_Flavobacteriia;o_Flavobacteriales;f_Cryomorphaceae            |               |               |               |                |               |
| Root;k_Bacteria;p_Bacteroidetes;c_Flavobacteriia;o_Flavobacteriales;f_Flavobacteriaceae         | 0.3010        | 0.0001        | 0.0000        | 0.0001         | 0.0001        |
| Root;k_Bacteria;p_Bacteroidetes;c_Sphingobacteriia;o_Sphingobacteriales;f_                      |               |               |               |                |               |
| Root;k_Bacteria;p_Bacteroidetes;c_Sphingobacteriia;o_Sphingobacteriales;f_Chitinophagaceae      | 0.4783        | 0.0000        | 0.0000        | 0.0000         | 0.0000        |
| Root;k_Bacteria;p_Bacteroidetes;c_Sphingobacteriia;o_Sphingobacteriales;f_Flexibacteraceae      | 0.4783        | 0.0000        | 0.0000        | 0.0000         | 0.0001        |
| Root;k_Bacteria;p_Cyanobacteria;c_4COd-2;o_YS2;f_                                               | 0.6463        | 0.0036        | 0.0046        | -0.0010        | 0.0022        |
| Root;k_Bacteria;p_Cyanobacteria;c_Chloroplast;o_Streptophyta;f_                                 | 0.5016        | 0.0006        | 0.0000        | 0.0006         | 0.0009        |
| Root;k_Bacteria;p_Deferribacteres;c_Deferribacteres;o_Deferribacterales;f_Deferribacteraceae    |               |               |               |                |               |
| Root;k_Bacteria;p_Firmicutes;c_Bacilli;o_;                                                      |               |               |               |                |               |
| Root;k_Bacteria;p_Firmicutes;c_Bacilli;o_Bacillales;f_                                          |               |               |               |                |               |
| Root;k_Bacteria;p_Firmicutes;c_Bacilli;o_Bacillales;f_Alicyclobacillaceae                       |               |               |               |                |               |
| Root;k_Bacteria;p_Firmicutes;c_Bacilli;o_Bacillales;f_Bacillaceae                               |               |               |               |                |               |
| Root;k_Bacteria;p_Firmicutes;c_Bacilli;o_Bacillales;f_Paenibacillaceae                          |               |               |               |                |               |
| Root;k_Bacteria;p_Firmicutes;c_Bacilli;o_Bacillales;f_Planococcaceae                            |               |               |               |                |               |
| Root;k_Bacteria;p_Firmicutes;c_Bacilli;o_Bacillales;f_Staphylococcaceae                         |               |               |               |                |               |
| Root;k_Bacteria;p_Firmicutes;c_Bacilli;o_Bacillales;f_Thermoactinomycetaceae                    |               |               |               |                |               |
| Root;k_Bacteria;p_Firmicutes;c_Bacilli;o_Lactobacillales;f_                                     |               |               |               |                |               |
| Root;k_Bacteria;p_Firmicutes;c_Bacilli;o_Lactobacillales;f_Aerococcaceae                        |               |               |               |                |               |
| Root;k_Bacteria;p_Firmicutes;c_Bacilli;o_Lactobacillales;f_Carnobacteriaceae                    |               |               |               |                |               |
| Root;k_Bacteria;p_Firmicutes;c_Bacilli;o_Lactobacillales;f_Enterococcaceae                      |               |               |               |                |               |
| <b>Root;k_Bacteria;p_Firmicutes;c_Bacilli;o_Lactobacillales;f_Lactobacillaceae</b>              | <b>0.0405</b> | <b>0.0074</b> | <b>0.0130</b> | <b>-0.0056</b> | <b>0.0024</b> |
| Root;k_Bacteria;p_Firmicutes;c_Bacilli;o_Lactobacillales;f_Leuconostocaceae                     |               |               |               |                |               |
| Root;k_Bacteria;p_Firmicutes;c_Bacilli;o_Lactobacillales;f_Streptococcaceae                     |               |               |               |                |               |
| Root;k_Bacteria;p_Firmicutes;c_Bacilli;o_Turicibacterales;f_Turicibacteraceae                   | 0.5736        | 0.0010        | 0.0004        | 0.0006         | 0.0011        |

Chassaing et al, Supplemental Table 1.

|                                                                                                   |        |        |        |         |        |
|---------------------------------------------------------------------------------------------------|--------|--------|--------|---------|--------|
| Root;k_Bacteria;p_Firmicutes;c_Clostridia;o_f__                                                   | 0.7214 | 0.0167 | 0.0194 | -0.0027 | 0.0074 |
| Root;k_Bacteria;p_Firmicutes;c_Clostridia;o_Clostridiales;f__                                     | 0.1323 | 0.0209 | 0.0068 | 0.0141  | 0.0087 |
| Root;k_Bacteria;p_Firmicutes;c_Clostridia;o_Clostridiales;f_Clostridiaceae                        | 0.1593 | 0.0027 | 0.0658 | -0.0631 | 0.0421 |
| Root;k_Bacteria;p_Firmicutes;c_Clostridia;o_Clostridiales;f_Dehalobacteriaceae                    | 0.3827 | 0.0019 | 0.0013 | 0.0006  | 0.0007 |
| Root;k_Bacteria;p_Firmicutes;c_Clostridia;o_Clostridiales;f_Eubacteriaceae                        |        |        |        |         |        |
| Root;k_Bacteria;p_Firmicutes;c_Clostridia;o_Clostridiales;f_Lachnospiraceae                       | 0.2291 | 0.3243 | 0.2220 | 0.1024  | 0.0808 |
| Root;k_Bacteria;p_Firmicutes;c_Clostridia;o_Clostridiales;f_Peptococcaceae                        | 0.3563 | 0.0003 | 0.0000 | 0.0003  | 0.0003 |
| Root;k_Bacteria;p_Firmicutes;c_Clostridia;o_Clostridiales;f_Peptostreptococcaceae                 | 0.1571 | 0.0002 | 0.0028 | -0.0026 | 0.0017 |
| Root;k_Bacteria;p_Firmicutes;c_Clostridia;o_Clostridiales;f_Ruminococcaceae                       | 0.4567 | 0.1820 | 0.1455 | 0.0365  | 0.0474 |
| Root;k_Bacteria;p_Firmicutes;c_Clostridia;o_Coriobacteriales;f__                                  | 0.0911 | 0.0092 | 0.0036 | 0.0056  | 0.0030 |
| Root;k_Bacteria;p_Firmicutes;c_Clostridia;o_Coriobacteriales;f_Coriobacteriaceae                  | 0.5081 | 0.0004 | 0.0003 | 0.0002  | 0.0002 |
| Root;k_Bacteria;p_Firmicutes;c_Erysipelotrichi;o_Erysipelotrichales;f_Erysipelotrichaceae         | 0.3671 | 0.0064 | 0.0033 | 0.0031  | 0.0033 |
| Root;k_Bacteria;p_Firmicutes;c_Erysipelotrichi;o_Erysipelotrichales;f_[Coprobacillaceae]          | 0.1531 | 0.0005 | 0.0088 | -0.0084 | 0.0055 |
| Root;k_Bacteria;p_Planctomycetes;c_Planctomycetia;o_Gemmatales;f_Gemmataceae                      |        |        |        |         |        |
| Root;k_Bacteria;p_Planctomycetes;c_Planctomycetia;o_Pirellulales;f_Pirellulaceae                  |        |        |        |         |        |
| Root;k_Bacteria;p_Planctomycetes;c_Planctomycetia;o_Planctomycetales;f_Planctomycetaceae          |        |        |        |         |        |
| Root;k_Bacteria;p_Proteobacteria;c_Alphaproteobacteria;o_f__                                      | 0.2086 | 0.0000 | 0.0002 | -0.0001 | 0.0001 |
| Root;k_Bacteria;p_Proteobacteria;c_Alphaproteobacteria;o_RF32;f__                                 | 0.5078 | 0.0005 | 0.0010 | -0.0005 | 0.0007 |
| Root;k_Bacteria;p_Proteobacteria;c_Alphaproteobacteria;o_Rhizobiales;f_Brucellaceae               |        |        |        |         |        |
| Root;k_Bacteria;p_Proteobacteria;c_Alphaproteobacteria;o_Rhizobiales;f_Hyphomicrobiaceae          |        |        |        |         |        |
| Root;k_Bacteria;p_Proteobacteria;c_Alphaproteobacteria;o_Rhizobiales;f_Methylobacteriaceae        | 0.4783 | 0.0000 | 0.0000 | 0.0000  | 0.0000 |
| Root;k_Bacteria;p_Proteobacteria;c_Alphaproteobacteria;o_Rhizobiales;f_Rhizobiaceae               |        |        |        |         |        |
| Root;k_Bacteria;p_Proteobacteria;c_Alphaproteobacteria;o_Rhodobacterales;f_Rhodobacteraceae       |        |        |        |         |        |
| Root;k_Bacteria;p_Proteobacteria;c_Alphaproteobacteria;o_Rickettsiales;f_mitochondria             | 0.4783 | 0.0001 | 0.0000 | 0.0001  | 0.0001 |
| Root;k_Bacteria;p_Proteobacteria;c_Alphaproteobacteria;o_Sphingomonadales;f_Sphingomonadaceae     | 0.4783 | 0.0000 | 0.0000 | 0.0000  | 0.0000 |
| Root;k_Bacteria;p_Proteobacteria;c_Betaproteobacteria;o_Burkholderiales;f_Alcaligenaceae          | 0.2372 | 0.0080 | 0.0147 | -0.0067 | 0.0054 |
| Root;k_Bacteria;p_Proteobacteria;c_Betaproteobacteria;o_Burkholderiales;f_Burkholderiaceae        |        |        |        |         |        |
| Root;k_Bacteria;p_Proteobacteria;c_Betaproteobacteria;o_Burkholderiales;f_Comamonadaceae          | 0.4783 | 0.0000 | 0.0000 | 0.0000  | 0.0001 |
| Root;k_Bacteria;p_Proteobacteria;c_Betaproteobacteria;o_Burkholderiales;f_Oxalobacteraceae        |        |        |        |         |        |
| Root;k_Bacteria;p_Proteobacteria;c_Betaproteobacteria;o_Methylophilales;f_Methylophilaceae        |        |        |        |         |        |
| Root;k_Bacteria;p_Proteobacteria;c_Betaproteobacteria;o_Rhodocyclales;f_Rhodocyclaceae            |        |        |        |         |        |
| Root;k_Bacteria;p_Proteobacteria;c_Deltaproteobacteria;o_Desulfovibrionales;f_Desulfovibrionaceae | 0.7340 | 0.0100 | 0.0118 | -0.0019 | 0.0053 |
| Root;k_Bacteria;p_Proteobacteria;c_Deltaproteobacteria;o_Myxococcales;f__                         |        |        |        |         |        |
| Root;k_Bacteria;p_Proteobacteria;c_Deltaproteobacteria;o_Myxococcales;f_Nannocystaceae            | 0.4783 | 0.0000 | 0.0000 | 0.0000  | 0.0000 |
| Root;k_Bacteria;p_Proteobacteria;c_Deltaproteobacteria;o_Spirobacillales;f__                      |        |        |        |         |        |
| Root;k_Bacteria;p_Proteobacteria;c_Epsilonproteobacteria;o_Campylobacterales;f_Helicobacteraceae  | 0.5802 | 0.0307 | 0.0527 | -0.0220 | 0.0388 |
| Root;k_Bacteria;p_Proteobacteria;c_Gammaproteobacteria;o_Aeromonadales;f__                        | 0.2107 | 0.0002 | 0.0000 | 0.0002  | 0.0001 |
| Root;k_Bacteria;p_Proteobacteria;c_Gammaproteobacteria;o_Aeromonadales;f_Aeromonadaceae           |        |        |        |         |        |
| Root;k_Bacteria;p_Proteobacteria;c_Gammaproteobacteria;o_Enterobacteriales;f_Enterobacteriaceae   | 0.5970 | 0.1418 | 0.0763 | 0.0655  | 0.1207 |
| Root;k_Bacteria;p_Proteobacteria;c_Gammaproteobacteria;o_Pasteurellales;f_Pasteurellaceae         | 0.1902 | 0.0000 | 0.0000 | 0.0000  | 0.0000 |
| Root;k_Bacteria;p_Proteobacteria;c_Gammaproteobacteria;o_Pseudomonadales;f_Moraxellaceae          | 0.4725 | 0.0003 | 0.0000 | 0.0003  | 0.0004 |
| Root;k_Bacteria;p_Proteobacteria;c_Gammaproteobacteria;o_Pseudomonadales;f_Pseudomonadaceae       |        |        |        |         |        |
| Root;k_Bacteria;p_Proteobacteria;c_Gammaproteobacteria;o_Xanthomonadales;f_Xanthomonadaceae       |        |        |        |         |        |

Chassaing et al, Supplemental Table 1.

|                                                                                                             |                    |               |               |                |               |
|-------------------------------------------------------------------------------------------------------------|--------------------|---------------|---------------|----------------|---------------|
| Root;k__Bacteria;p__TM7;c__TM7-3;o__CW040;f__F16                                                            | 0.9546             | 0.0000        | 0.0000        | 0.0000         | 0.0001        |
| Root;k__Bacteria;p__Tenericutes;c__Mollicutes;o__Acholeplasmatales;f__Acholeplasmataceae                    |                    |               |               |                |               |
| Root;k__Bacteria;p__Tenericutes;c__Mollicutes;o__Anaeroplasmatales;f__Anaeroplasmataceae                    | 0.6933             | 0.0015        | 0.0008        | 0.0007         | 0.0017        |
| Root;k__Bacteria;p__Tenericutes;c__Mollicutes;o__Mycoplasmatales;f__Mycoplasmataceae                        | 0.2846             | 0.0018        | 0.0000        | 0.0018         | 0.0016        |
| Root;k__Bacteria;p__Tenericutes;c__Mollicutes;o__RF39;f__                                                   | 0.3816             | 0.0025        | 0.0012        | 0.0013         | 0.0015        |
| <b>Root;k__Bacteria;p__Verrucomicrobia;c__Verrucomicrobiae;o__Verrucomicrobiales;f__Verrucomicrobiaceae</b> | <b>&lt; 0.0001</b> | <b>0.0043</b> | <b>0.0654</b> | <b>-0.0610</b> | <b>0.0094</b> |



**TLR5<sup>-/-</sup> water versus TLR5<sup>-/-</sup> CMC - Feces**

| Phyla level                       | P value       | Mean water-treated | Mean CMC-treated | Difference     | SE of difference |
|-----------------------------------|---------------|--------------------|------------------|----------------|------------------|
| Root;k_Bacteria;p_Actinobacteria  | <b>0.0325</b> | <b>0.0036</b>      | <b>0.0227</b>    | <b>-0.0192</b> | <b>0.0072</b>    |
| Root;k_Bacteria;p_Bacteroidetes   | <b>0.0489</b> | <b>0.4535</b>      | <b>0.5943</b>    | <b>-0.1408</b> | <b>0.0592</b>    |
| Root;k_Bacteria;p_Cyanobacteria   | 0.5397        | 0.0031             | 0.0076           | -0.0045        | 0.0069           |
| Root;k_Bacteria;p_Deferribacteres | 0.2420        | 0.0004             | 0.0001           | 0.0003         | 0.0003           |
| Root;k_Bacteria;p_Firmicutes      | 0.0653        | 0.4094             | 0.2730           | 0.1364         | 0.0625           |
| Root;k_Bacteria;p_Planctomycetes  |               |                    |                  |                |                  |
| Root;k_Bacteria;p_Proteobacteria  | 0.5621        | 0.1193             | 0.0994           | 0.0199         | 0.0327           |
| Root;k_Bacteria;p_TM7             | 0.3966        | 0.0002             | 0.0001           | 0.0001         | 0.0001           |
| Root;k_Bacteria;p_Tenericutes     | 0.0502        | 0.0064             | 0.0028           | 0.0036         | 0.0015           |
| Root;k_Bacteria;p_Verrucomicrobia | <b>0.0413</b> | <b>0.0041</b>      | <b>0.0000</b>    | <b>0.0041</b>  | <b>0.0016</b>    |

| Class level                                              | P value            | Mean water-treated | Mean CMC-treated | Difference     | SE of difference |
|----------------------------------------------------------|--------------------|--------------------|------------------|----------------|------------------|
| Root;k_Bacteria;p_Actinobacteria;c_Actinobacteria        | <b>0.0325</b>      | <b>0.0036</b>      | <b>0.0227</b>    | <b>-0.0192</b> | <b>0.0072</b>    |
| Root;k_Bacteria;p_Actinobacteria;c_Thermoleophilia       | <b>&lt; 0.0001</b> | <b>0.4535</b>      | <b>0.0000</b>    | <b>0.4535</b>  | <b>0.0365</b>    |
| Root;k_Bacteria;p_Bacteroidetes;c_Bacteroidia            | <b>&lt; 0.0001</b> | <b>0.0031</b>      | <b>0.5943</b>    | <b>-0.5912</b> | <b>0.0465</b>    |
| Root;k_Bacteria;p_Bacteroidetes;c_Flavobacteriia         | 0.1504             | 0.0004             | 0.0000           | 0.0004         | 0.0003           |
| Root;k_Bacteria;p_Bacteroidetes;c_Sphingobacteriia       | <b>&lt; 0.0001</b> | <b>0.4094</b>      | <b>0.0000</b>    | <b>0.4094</b>  | <b>0.0487</b>    |
| Root;k_Bacteria;p_Cyanobacteria;c_4C0d-2                 | 0.3155             | 0.0000             | 0.0075           | -0.0075        | 0.0069           |
| Root;k_Bacteria;p_Cyanobacteria;c_Chloroplast            | <b>0.0038</b>      | <b>0.1193</b>      | <b>0.0001</b>    | <b>0.1193</b>  | <b>0.0280</b>    |
| Root;k_Bacteria;p_Deferribacteres;c_Deferribacteres      | 0.4808             | 0.0002             | 0.0001           | 0.0001         | 0.0001           |
| Root;k_Bacteria;p_Firmicutes;c_Bacilli                   | 0.0991             | 0.0064             | 0.0366           | -0.0302        | 0.0159           |
| Root;k_Bacteria;p_Firmicutes;c_Clostridia                | <b>0.0007</b>      | <b>0.0041</b>      | <b>0.1763</b>    | <b>-0.1722</b> | <b>0.0296</b>    |
| Root;k_Bacteria;p_Firmicutes;c_Erysipelotrichi           |                    |                    |                  |                |                  |
| Root;k_Bacteria;p_Planctomycetes;c_Planctomycetia        |                    |                    |                  |                |                  |
| Root;k_Bacteria;p_Proteobacteria;c_Alphaproteobacteria   |                    |                    |                  |                |                  |
| Root;k_Bacteria;p_Proteobacteria;c_Betaproteobacteria    |                    |                    |                  |                |                  |
| Root;k_Bacteria;p_Proteobacteria;c_Deltaproteobacteria   | <b>0.0321</b>      | <b>0.0482</b>      | <b>0.0157</b>    | <b>0.0325</b>  | <b>0.0122</b>    |
| Root;k_Bacteria;p_Proteobacteria;c_Epsilonproteobacteria | 0.5349             | 0.0204             | 0.0308           | -0.0104        | 0.0160           |
| Root;k_Bacteria;p_Proteobacteria;c_Gammaproteobacteria   |                    |                    |                  |                |                  |
| Root;k_Bacteria;p_TM7;c_TM7-3                            | <b>0.0095</b>      | <b>0.0003</b>      | <b>0.0001</b>    | <b>0.0002</b>  | <b>0.0001</b>    |
| Root;k_Bacteria;p_Tenericutes;c_Mollicutes               | 0.0644             | 0.0073             | 0.0028           | 0.0045         | 0.0020           |
| Root;k_Bacteria;p_Verrucomicrobia;c_Verrucomicrobiae     |                    |                    |                  |                |                  |

| Order level                                                              | P value       | Mean water-treated | Mean CMC-treated | Difference     | SE of difference |
|--------------------------------------------------------------------------|---------------|--------------------|------------------|----------------|------------------|
| Root;k_Bacteria;p_Actinobacteria;c_Actinobacteria;o_Actinomycetales      |               |                    |                  |                |                  |
| Root;k_Bacteria;p_Actinobacteria;c_Actinobacteria;o_Bifidobacteriales    | <b>0.0449</b> | <b>0.0056</b>      | <b>0.0227</b>    | <b>-0.0171</b> | <b>0.0070</b>    |
| Root;k_Bacteria;p_Actinobacteria;c_Thermoleophilia;o_Solirubrobacterales |               |                    |                  |                |                  |
| Root;k_Bacteria;p_Bacteroidetes;c_Bacteroidia;o_Bacteroidales            | <b>0.0078</b> | <b>0.4175</b>      | <b>0.5943</b>    | <b>-0.1769</b> | <b>0.0480</b>    |
| Root;k_Bacteria;p_Bacteroidetes;c_Flavobacteriia;o_Flavobacteriales      |               |                    |                  |                |                  |
| Root;k_Bacteria;p_Bacteroidetes;c_Sphingobacteriia;o_Sphingobacteriales  |               |                    |                  |                |                  |

|                                                                                    |                    |               |               |                |               |
|------------------------------------------------------------------------------------|--------------------|---------------|---------------|----------------|---------------|
| Root;k_Bacteria;p_Cyanobacteria;c_4C0d-2;o_YS2                                     | 0.3773             | 0.0010        | 0.0075        | -0.0065        | 0.0069        |
| Root;k_Bacteria;p_Cyanobacteria;c_Chloroplast;o_Streptophyta                       | 0.2034             | 0.0003        | 0.0001        | 0.0002         | 0.0001        |
| Root;k_Bacteria;p_Deferribacteres;c_Deferribacteres;o_Deferribacterales            | 0.8334             | 0.0001        | 0.0001        | 0.0000         | 0.0001        |
| Root;k_Bacteria;p_Firmicutes;c_Bacilli;o_                                          |                    |               |               |                |               |
| Root;k_Bacteria;p_Firmicutes;c_Bacilli;o_Bacillales                                | 0.0681             | 0.0000        | 0.0001        | -0.0001        | 0.0001        |
| Root;k_Bacteria;p_Firmicutes;c_Bacilli;o_Lactobacillales                           | 0.1226             | 0.0668        | 0.0364        | 0.0303         | 0.0173        |
| <b>Root;k_Bacteria;p_Firmicutes;c_Bacilli;o_Turicibacterales</b>                   | <b>0.0068</b>      | <b>0.0283</b> | <b>0.0000</b> | <b>0.0283</b>  | <b>0.0075</b> |
| <b>Root;k_Bacteria;p_Firmicutes;c_Clostridia;o_</b>                                | <b>0.0032</b>      | <b>0.0262</b> | <b>0.0068</b> | <b>0.0194</b>  | <b>0.0044</b> |
| <b>Root;k_Bacteria;p_Firmicutes;c_Clostridia;o_Clostridiales</b>                   | <b>0.0045</b>      | <b>0.3161</b> | <b>0.1658</b> | <b>0.1503</b>  | <b>0.0366</b> |
| <b>Root;k_Bacteria;p_Firmicutes;c_Clostridia;o_Coriobacteriales</b>                | <b>&lt; 0.0001</b> | <b>0.0157</b> | <b>0.0037</b> | <b>0.0120</b>  | <b>0.0011</b> |
| Root;k_Bacteria;p_Firmicutes;c_Erysipelotrichi;o_Erysipelotrichales                | 0.4101             | 0.0371        | 0.0601        | -0.0231        | 0.0263        |
| Root;k_Bacteria;p_Planctomycetes;c_Planctomycetia;o_Gemmatales                     |                    |               |               |                |               |
| Root;k_Bacteria;p_Planctomycetes;c_Planctomycetia;o_Pirellulales                   |                    |               |               |                |               |
| Root;k_Bacteria;p_Planctomycetes;c_Planctomycetia;o_Planctomycetales               |                    |               |               |                |               |
| Root;k_Bacteria;p_Proteobacteria;c_Alphaproteobacteria;o_                          | 0.4071             | 0.0000        | 0.0000        | 0.0000         | 0.0000        |
| Root;k_Bacteria;p_Proteobacteria;c_Alphaproteobacteria;o_RF32                      | 0.7475             | 0.0001        | 0.0001        | 0.0000         | 0.0001        |
| Root;k_Bacteria;p_Proteobacteria;c_Alphaproteobacteria;o_Rhizobiales               |                    |               |               |                |               |
| Root;k_Bacteria;p_Proteobacteria;c_Alphaproteobacteria;o_Rhodobacterales           |                    |               |               |                |               |
| Root;k_Bacteria;p_Proteobacteria;c_Alphaproteobacteria;o_Rickettsiales             | 0.4071             | 0.0000        | 0.0000        | 0.0000         | 0.0000        |
| Root;k_Bacteria;p_Proteobacteria;c_Alphaproteobacteria;o_Sphingomonadales          |                    |               |               |                |               |
| <b>Root;k_Bacteria;p_Proteobacteria;c_Betaproteobacteria;o_Burkholderiales</b>     | <b>0.0133</b>      | <b>0.0092</b> | <b>0.0527</b> | <b>-0.0435</b> | <b>0.0132</b> |
| Root;k_Bacteria;p_Proteobacteria;c_Betaproteobacteria;o_Methylophilales            |                    |               |               |                |               |
| Root;k_Bacteria;p_Proteobacteria;c_Betaproteobacteria;o_Rhodocyclales              |                    |               |               |                |               |
| <b>Root;k_Bacteria;p_Proteobacteria;c_Deltaproteobacteria;o_Desulfovibrionales</b> | <b>0.0321</b>      | <b>0.0482</b> | <b>0.0157</b> | <b>0.0325</b>  | <b>0.0122</b> |
| Root;k_Bacteria;p_Proteobacteria;c_Deltaproteobacteria;o_Myxococcales              |                    |               |               |                |               |
| Root;k_Bacteria;p_Proteobacteria;c_Deltaproteobacteria;o_Spirobacillales           |                    |               |               |                |               |
| Root;k_Bacteria;p_Proteobacteria;c_Epsilonproteobacteria;o_Campylobacterales       | 0.5349             | 0.0204        | 0.0308        | -0.0104        | 0.0160        |
| Root;k_Bacteria;p_Proteobacteria;c_Gammaproteobacteria;o_Aeromonadales             |                    |               |               |                |               |
| Root;k_Bacteria;p_Proteobacteria;c_Gammaproteobacteria;o_Enterobacteriales         |                    |               |               |                |               |
| Root;k_Bacteria;p_Proteobacteria;c_Gammaproteobacteria;o_Pasteurellales            |                    |               |               |                |               |
| Root;k_Bacteria;p_Proteobacteria;c_Gammaproteobacteria;o_Pseudomonadales           |                    |               |               |                |               |
| Root;k_Bacteria;p_Proteobacteria;c_Gammaproteobacteria;o_Xanthomonadales           |                    |               |               |                |               |
| <b>Root;k_Bacteria;p_TM7;c_TM7-3;o_CW040</b>                                       | <b>0.0095</b>      | <b>0.0003</b> | <b>0.0001</b> | <b>0.0002</b>  | <b>0.0001</b> |
| Root;k_Bacteria;p_Tenericutes;c_Mollicutes;o_Acholeplasmatales                     |                    |               |               |                |               |
| Root;k_Bacteria;p_Tenericutes;c_Mollicutes;o_Anaeroplasmatales                     |                    |               |               |                |               |
| <b>Root;k_Bacteria;p_Tenericutes;c_Mollicutes;o_Mycoplasmatales</b>                | <b>0.0105</b>      | <b>0.0070</b> | <b>0.0008</b> | <b>0.0062</b>  | <b>0.0018</b> |
| Root;k_Bacteria;p_Tenericutes;c_Mollicutes;o_RF39                                  | 0.1096             | 0.0003        | 0.0020        | -0.0018        | 0.0010        |
| Root;k_Bacteria;p_Verrucomicrobia;c_Verrucomicrobiae;o_Verrucomicrobiales          |                    |               |               |                |               |

| Family level                                                                            | P value | Mean water-treated | Mean CMC-treated | Difference | SE of difference |
|-----------------------------------------------------------------------------------------|---------|--------------------|------------------|------------|------------------|
| Root;k_Bacteria;p_Actinobacteria;c_Actinobacteria;o_Actinomycetales;f_                  |         |                    |                  |            |                  |
| Root;k_Bacteria;p_Actinobacteria;c_Actinobacteria;o_Actinomycetales;f_ACK-M1            |         |                    |                  |            |                  |
| Root;k_Bacteria;p_Actinobacteria;c_Actinobacteria;o_Actinomycetales;f_Brevibacteriaceae |         |                    |                  |            |                  |

|                                                                                                   |               |               |               |                |               |
|---------------------------------------------------------------------------------------------------|---------------|---------------|---------------|----------------|---------------|
| Root;k_Bacteria;p_Actinobacteria;c_Actinobacteria;o_Actinomycetales;f_Corynebacteriaceae          |               |               |               |                |               |
| Root;k_Bacteria;p_Actinobacteria;c_Actinobacteria;o_Actinomycetales;f_Dermabacteraceae            |               |               |               |                |               |
| Root;k_Bacteria;p_Actinobacteria;c_Actinobacteria;o_Actinomycetales;f_Frankiaceae                 |               |               |               |                |               |
| Root;k_Bacteria;p_Actinobacteria;c_Actinobacteria;o_Actinomycetales;f_Kineosporiaceae             |               |               |               |                |               |
| Root;k_Bacteria;p_Actinobacteria;c_Actinobacteria;o_Actinomycetales;f_Microbacteriaceae           |               |               |               |                |               |
| Root;k_Bacteria;p_Actinobacteria;c_Actinobacteria;o_Actinomycetales;f_Micrococcaceae              |               |               |               |                |               |
| Root;k_Bacteria;p_Actinobacteria;c_Actinobacteria;o_Actinomycetales;f_Nocardiaceae                |               |               |               |                |               |
| Root;k_Bacteria;p_Actinobacteria;c_Actinobacteria;o_Actinomycetales;f_Promicromonosporaceae       |               |               |               |                |               |
| Root;k_Bacteria;p_Actinobacteria;c_Actinobacteria;o_Actinomycetales;f_Streptomycetaceae           |               |               |               |                |               |
| Root;k_Bacteria;p_Actinobacteria;c_Actinobacteria;o_Bifidobacteriales;f__                         | 0.4071        | 0.0000        | 0.0001        | -0.0001        | 0.0001        |
| <b>Root;k_Bacteria;p_Actinobacteria;c_Actinobacteria;o_Bifidobacteriales;f_Bifidobacteriaceae</b> | <b>0.0447</b> | <b>0.0056</b> | <b>0.0226</b> | <b>-0.0170</b> | <b>0.0070</b> |
| Root;k_Bacteria;p_Actinobacteria;c_Thermoleophilia;o_Solirubrobacterales;f_Solirubrobacteraceae   |               |               |               |                |               |
| Root;k_Bacteria;p_Bacteroidetes;c_Bacteroidia;o_Bacteroidales;f__                                 | 0.4102        | 0.0003        | 0.0010        | -0.0007        | 0.0007        |
| Root;k_Bacteria;p_Bacteroidetes;c_Bacteroidia;o_Bacteroidales;f_Bacteroidaceae                    | 0.3215        | 0.0410        | 0.0597        | -0.0186        | 0.0175        |
| Root;k_Bacteria;p_Bacteroidetes;c_Bacteroidia;o_Bacteroidales;f_Porphyrimonadaceae                | 0.2966        | 0.0032        | 0.0016        | 0.0016         | 0.0014        |
| <b>Root;k_Bacteria;p_Bacteroidetes;c_Bacteroidia;o_Bacteroidales;f_Prevotellaceae</b>             | <b>0.0031</b> | <b>0.0202</b> | <b>0.0029</b> | <b>0.0173</b>  | <b>0.0039</b> |
| Root;k_Bacteria;p_Bacteroidetes;c_Bacteroidia;o_Bacteroidales;f_Rikenellaceae                     | 0.0518        | 0.0121        | 0.0036        | 0.0084         | 0.0036        |
| <b>Root;k_Bacteria;p_Bacteroidetes;c_Bacteroidia;o_Bacteroidales;f_S24-7</b>                      | <b>0.0012</b> | <b>0.3380</b> | <b>0.5233</b> | <b>-0.1853</b> | <b>0.0356</b> |
| Root;k_Bacteria;p_Bacteroidetes;c_Bacteroidia;o_Bacteroidales;f_[Odoribacteraceae]                | 0.5630        | 0.0027        | 0.0023        | 0.0004         | 0.0007        |
| Root;k_Bacteria;p_Bacteroidetes;c_Flavobacteriia;o_Flavobacteriales;f_Cryomorphaceae              |               |               |               |                |               |
| Root;k_Bacteria;p_Bacteroidetes;c_Flavobacteriia;o_Flavobacteriales;f_Flavobacteriaceae           |               |               |               |                |               |
| Root;k_Bacteria;p_Bacteroidetes;c_Sphingobacteriia;o_Sphingobacteriales;f__                       |               |               |               |                |               |
| Root;k_Bacteria;p_Bacteroidetes;c_Sphingobacteriia;o_Sphingobacteriales;f_Chitinophagaceae        |               |               |               |                |               |
| Root;k_Bacteria;p_Bacteroidetes;c_Sphingobacteriia;o_Sphingobacteriales;f_Flexibacteraceae        |               |               |               |                |               |
| Root;k_Bacteria;p_Cyanobacteria;c_4COd-2;o_YS2;f__                                                | 0.3773        | 0.0010        | 0.0075        | -0.0065        | 0.0069        |
| Root;k_Bacteria;p_Cyanobacteria;c_Chloroplast;o_Streptophyta;f__                                  | 0.2034        | 0.0003        | 0.0001        | 0.0002         | 0.0001        |
| Root;k_Bacteria;p_Deferribacteres;c_Deferribacteres;o_Deferribacterales;f_Deferribacteraceae      | 0.8334        | 0.0001        | 0.0001        | 0.0000         | 0.0001        |
| Root;k_Bacteria;p_Firmicutes;c_Bacilli;o__;f__                                                    |               |               |               |                |               |
| Root;k_Bacteria;p_Firmicutes;c_Bacilli;o_Bacillales;f__                                           |               |               |               |                |               |
| Root;k_Bacteria;p_Firmicutes;c_Bacilli;o_Bacillales;f_Alicyclobacillaceae                         |               |               |               |                |               |
| Root;k_Bacteria;p_Firmicutes;c_Bacilli;o_Bacillales;f_Bacillaceae                                 |               |               |               |                |               |
| Root;k_Bacteria;p_Firmicutes;c_Bacilli;o_Bacillales;f_Paenibacillaceae                            |               |               |               |                |               |
| Root;k_Bacteria;p_Firmicutes;c_Bacilli;o_Bacillales;f_Planococcaceae                              | 0.4071        | 0.0000        | 0.0000        | 0.0000         | 0.0000        |
| Root;k_Bacteria;p_Firmicutes;c_Bacilli;o_Bacillales;f_Staphylococcaceae                           | 0.1930        | 0.0000        | 0.0001        | -0.0001        | 0.0001        |
| Root;k_Bacteria;p_Firmicutes;c_Bacilli;o_Bacillales;f_Thermoactinomycetaceae                      |               |               |               |                |               |
| Root;k_Bacteria;p_Firmicutes;c_Bacilli;o_Lactobacillales;f__                                      |               |               |               |                |               |
| Root;k_Bacteria;p_Firmicutes;c_Bacilli;o_Lactobacillales;f_Aerococcaceae                          |               |               |               |                |               |
| Root;k_Bacteria;p_Firmicutes;c_Bacilli;o_Lactobacillales;f_Carnobacteriaceae                      |               |               |               |                |               |
| Root;k_Bacteria;p_Firmicutes;c_Bacilli;o_Lactobacillales;f_Enterococcaceae                        |               |               |               |                |               |
| Root;k_Bacteria;p_Firmicutes;c_Bacilli;o_Lactobacillales;f_Lactobacillaceae                       | 0.1230        | 0.0667        | 0.0364        | 0.0303         | 0.0173        |
| Root;k_Bacteria;p_Firmicutes;c_Bacilli;o_Lactobacillales;f_Leuconostocaceae                       |               |               |               |                |               |
| Root;k_Bacteria;p_Firmicutes;c_Bacilli;o_Lactobacillales;f_Streptococcaceae                       | 0.8917        | 0.0000        | 0.0000        | 0.0000         | 0.0001        |
| <b>Root;k_Bacteria;p_Firmicutes;c_Bacilli;o_Turicibacterales;f_Turicibacteraceae</b>              | <b>0.0068</b> | <b>0.0283</b> | <b>0.0000</b> | <b>0.0283</b>  | <b>0.0075</b> |

|                                                                                                   |          |        |        |         |        |
|---------------------------------------------------------------------------------------------------|----------|--------|--------|---------|--------|
| Root;k_Bacteria;p_Firmicutes;c_Clostridia;o_;                                                     | 0.0032   | 0.0262 | 0.0068 | 0.0194  | 0.0044 |
| Root;k_Bacteria;p_Firmicutes;c_Clostridia;o_Clostridiales;f_                                      | 0.0500   | 0.0007 | 0.0003 | 0.0003  | 0.0001 |
| Root;k_Bacteria;p_Firmicutes;c_Clostridia;o_Clostridiales;f_Clostridiaceae                        | 0.0926   | 0.0027 | 0.0012 | 0.0016  | 0.0008 |
| Root;k_Bacteria;p_Firmicutes;c_Clostridia;o_Clostridiales;f_Dehalobacteriaceae                    | < 0.0001 | 0.0029 | 0.0006 | 0.0023  | 0.0003 |
| Root;k_Bacteria;p_Firmicutes;c_Clostridia;o_Clostridiales;f_Eubacteriaceae                        |          |        |        |         |        |
| Root;k_Bacteria;p_Firmicutes;c_Clostridia;o_Clostridiales;f_Lachnospiraceae                       | 0.0097   | 0.2529 | 0.1305 | 0.1224  | 0.0347 |
| Root;k_Bacteria;p_Firmicutes;c_Clostridia;o_Clostridiales;f_Peptococcaceae                        |          |        |        |         |        |
| Root;k_Bacteria;p_Firmicutes;c_Clostridia;o_Clostridiales;f_Peptostreptococcaceae                 | 0.4071   | 0.0000 | 0.0000 | 0.0000  | 0.0000 |
| Root;k_Bacteria;p_Firmicutes;c_Clostridia;o_Clostridiales;f_Ruminococcaceae                       | 0.0550   | 0.0569 | 0.0332 | 0.0237  | 0.0103 |
| Root;k_Bacteria;p_Firmicutes;c_Clostridia;o_Coriobacteriales;f_                                   | < 0.0001 | 0.0112 | 0.0024 | 0.0088  | 0.0007 |
| Root;k_Bacteria;p_Firmicutes;c_Clostridia;o_Coriobacteriales;f_Coriobacteriaceae                  | 0.0043   | 0.0045 | 0.0013 | 0.0032  | 0.0008 |
| Root;k_Bacteria;p_Firmicutes;c_Erysipelotrichi;o_Erysipelotrichales;f_Erysipelotrichaceae         | 0.4090   | 0.0370 | 0.0600 | -0.0231 | 0.0263 |
| Root;k_Bacteria;p_Firmicutes;c_Erysipelotrichi;o_Erysipelotrichales;f_[Coproba]cillaceae          | 0.8855   | 0.0001 | 0.0001 | 0.0000  | 0.0001 |
| Root;k_Bacteria;p_Planctomycetes;c_Planctomycetia;o_Gemmatales;f_Gemmataceae                      |          |        |        |         |        |
| Root;k_Bacteria;p_Planctomycetes;c_Planctomycetia;o_Pirellulales;f_Pirellulaceae                  |          |        |        |         |        |
| Root;k_Bacteria;p_Planctomycetes;c_Planctomycetia;o_Planctomycetales;f_Planctomycetaceae          |          |        |        |         |        |
| Root;k_Bacteria;p_Proteobacteria;c_Alphaproteobacteria;o_;                                        | 0.4071   | 0.0000 | 0.0000 | 0.0000  | 0.0000 |
| Root;k_Bacteria;p_Proteobacteria;c_Alphaproteobacteria;o_RF32;f_                                  | 0.7475   | 0.0001 | 0.0001 | 0.0000  | 0.0001 |
| Root;k_Bacteria;p_Proteobacteria;c_Alphaproteobacteria;o_Rhizobiales;f_Brucellaceae               |          |        |        |         |        |
| Root;k_Bacteria;p_Proteobacteria;c_Alphaproteobacteria;o_Rhizobiales;f_Hyphomicrobiaceae          |          |        |        |         |        |
| Root;k_Bacteria;p_Proteobacteria;c_Alphaproteobacteria;o_Rhizobiales;f_Methylobacteriaceae        |          |        |        |         |        |
| Root;k_Bacteria;p_Proteobacteria;c_Alphaproteobacteria;o_Rhizobiales;f_Rhizobiaceae               |          |        |        |         |        |
| Root;k_Bacteria;p_Proteobacteria;c_Alphaproteobacteria;o_Rhodobacterales;f_Rhodobacteraceae       |          |        |        |         |        |
| Root;k_Bacteria;p_Proteobacteria;c_Alphaproteobacteria;o_Rickettsiales;f_mitochondria             | 0.4071   | 0.0000 | 0.0000 | 0.0000  | 0.0000 |
| Root;k_Bacteria;p_Proteobacteria;c_Alphaproteobacteria;o_Sphingomonadales;f_Sphingomonadaceae     |          |        |        |         |        |
| Root;k_Bacteria;p_Proteobacteria;c_Betaproteobacteria;o_Burkholderiales;f_Alcaligenaceae          | 0.0133   | 0.0092 | 0.0527 | -0.0435 | 0.0132 |
| Root;k_Bacteria;p_Proteobacteria;c_Betaproteobacteria;o_Burkholderiales;f_Burkholderiaceae        |          |        |        |         |        |
| Root;k_Bacteria;p_Proteobacteria;c_Betaproteobacteria;o_Burkholderiales;f_Comamonadaceae          |          |        |        |         |        |
| Root;k_Bacteria;p_Proteobacteria;c_Betaproteobacteria;o_Burkholderiales;f_Oxalobacteraceae        |          |        |        |         |        |
| Root;k_Bacteria;p_Proteobacteria;c_Betaproteobacteria;o_Methylophilales;f_Methylophilaceae        |          |        |        |         |        |
| Root;k_Bacteria;p_Proteobacteria;c_Betaproteobacteria;o_Rhodocyclales;f_Rhodocyclaceae            |          |        |        |         |        |
| Root;k_Bacteria;p_Proteobacteria;c_Deltaproteobacteria;o_Desulfovibrionales;f_Desulfovibrionaceae | 0.0321   | 0.0482 | 0.0157 | 0.0325  | 0.0122 |
| Root;k_Bacteria;p_Proteobacteria;c_Deltaproteobacteria;o_Myxococcales;f_                          |          |        |        |         |        |
| Root;k_Bacteria;p_Proteobacteria;c_Deltaproteobacteria;o_Myxococcales;f_Nannocystaceae            |          |        |        |         |        |
| Root;k_Bacteria;p_Proteobacteria;c_Deltaproteobacteria;o_Spirobacillales;f_                       |          |        |        |         |        |
| Root;k_Bacteria;p_Proteobacteria;c_Epsilonproteobacteria;o_Campylobacterales;f_Helicobacteraceae  | 0.5349   | 0.0204 | 0.0308 | -0.0104 | 0.0160 |
| Root;k_Bacteria;p_Proteobacteria;c_Gammaproteobacteria;o_Aeromonadales;f_                         |          |        |        |         |        |
| Root;k_Bacteria;p_Proteobacteria;c_Gammaproteobacteria;o_Aeromonadales;f_Aeromonadaceae           |          |        |        |         |        |
| Root;k_Bacteria;p_Proteobacteria;c_Gammaproteobacteria;o_Enterobacteriales;f_Enterobacteriaceae   |          |        |        |         |        |
| Root;k_Bacteria;p_Proteobacteria;c_Gammaproteobacteria;o_Pasteurellales;f_Pasteurellaceae         |          |        |        |         |        |
| Root;k_Bacteria;p_Proteobacteria;c_Gammaproteobacteria;o_Pseudomonadales;f_Moraxellaceae          |          |        |        |         |        |
| Root;k_Bacteria;p_Proteobacteria;c_Gammaproteobacteria;o_Pseudomonadales;f_Pseudomonadaceae       |          |        |        |         |        |
| Root;k_Bacteria;p_Proteobacteria;c_Gammaproteobacteria;o_Xanthomonadales;f_Xanthomonadaceae       |          |        |        |         |        |

Chassaing et al, Supplemental Table 1.

|                                                                                                 |               |               |               |               |               |
|-------------------------------------------------------------------------------------------------|---------------|---------------|---------------|---------------|---------------|
| <b>Root;k_Bacteria;p_TM7;c_TM7-3;o_CW040;f_F16</b>                                              | <b>0.0095</b> | <b>0.0003</b> | <b>0.0001</b> | <b>0.0002</b> | <b>0.0001</b> |
| Root;k_Bacteria;p_Tenericutes;c_Mollicutes;o_Acholeplasmatales;f_Acholeplasmataceae             |               |               |               |               |               |
| Root;k_Bacteria;p_Tenericutes;c_Mollicutes;o_Anaeroplasmatales;f_Anaeroplasmataceae             |               |               |               |               |               |
| <b>Root;k_Bacteria;p_Tenericutes;c_Mollicutes;o_Mycoplasmatales;f_Mycoplasmataceae</b>          | <b>0.0105</b> | <b>0.0070</b> | <b>0.0008</b> | <b>0.0062</b> | <b>0.0018</b> |
| Root;k_Bacteria;p_Tenericutes;c_Mollicutes;o_RF39;f__                                           | 0.1096        | 0.0003        | 0.0020        | -0.0018       | 0.0010        |
| Root;k_Bacteria;p_Verrucomicrobia;c_Verrucomicrobiae;o_Verrucomicrobiales;f_Verrucomicrobiaceae |               |               |               |               |               |

## TLR5<sup>-/-</sup> water versus TLR5<sup>-/-</sup> CMC - Mucosa Associated Bacteria

| Phyla level                       | P value | Mean water-treated | Mean CMC-treated | Difference | SE of difference |
|-----------------------------------|---------|--------------------|------------------|------------|------------------|
| Root;k_Bacteria;p_Actinobacteria  | 0.2112  | 0.0004             | 0.0001           | 0.0003     | 0.0002           |
| Root;k_Bacteria;p_Bacteroidetes   | 0.8093  | 0.2255             | 0.2556           | -0.0301    | 0.1194           |
| Root;k_Bacteria;p_Cyanobacteria   | 0.5536  | 0.0025             | 0.0041           | -0.0017    | 0.0026           |
| Root;k_Bacteria;p_Deferribacteres | 0.1826  | 0.0023             | 0.0003           | 0.0020     | 0.0013           |
| Root;k_Bacteria;p_Firmicutes      | 0.4333  | 0.3385             | 0.2318           | 0.1067     | 0.1271           |
| Root;k_Bacteria;p_Planctomycetes  |         |                    |                  |            |                  |
| Root;k_Bacteria;p_Proteobacteria  | 0.6948  | 0.4118             | 0.5011           | -0.0893    | 0.2168           |
| Root;k_Bacteria;p_TM7             | 0.9010  | 0.0001             | 0.0000           | 0.0000     | 0.0001           |
| Root;k_Bacteria;p_Tenericutes     | 0.7093  | 0.0103             | 0.0069           | 0.0034     | 0.0088           |
| Root;k_Bacteria;p_Verrucomicrobia | 0.2542  | 0.0086             | 0.0001           | 0.0086     | 0.0068           |

| Class level                                                   | P value       | Mean water-treated | Mean CMC-treated | Difference    | SE of difference |
|---------------------------------------------------------------|---------------|--------------------|------------------|---------------|------------------|
| Root;k_Bacteria;p_Actinobacteria;c_Actinobacteria             | 0.2112        | 0.0004             | 0.0001           | 0.0003        | 0.0002           |
| Root;k_Bacteria;p_Actinobacteria;c_Thermoleophilia            |               |                    |                  |               |                  |
| Root;k_Bacteria;p_Bacteroidetes;c_Bacteroidia                 | 0.8089        | 0.2254             | 0.2556           | -0.0302       | 0.1194           |
| Root;k_Bacteria;p_Bacteroidetes;c_Flavobacteriia              | 0.3559        | 0.0001             | 0.0000           | 0.0001        | 0.0001           |
| Root;k_Bacteria;p_Bacteroidetes;c_Sphingobacteriia            |               |                    |                  |               |                  |
| Root;k_Bacteria;p_Cyanobacteria;c_4C0d-2                      | 0.5536        | 0.0025             | 0.0041           | -0.0017       | 0.0026           |
| Root;k_Bacteria;p_Cyanobacteria;c_Chloroplast                 |               |                    |                  |               |                  |
| Root;k_Bacteria;p_Deferribacteres;c_Deferribacteres           | 0.1826        | 0.0023             | 0.0003           | 0.0020        | 0.0013           |
| Root;k_Bacteria;p_Firmicutes;c_Bacilli                        | 0.2148        | 0.0173             | 0.0033           | 0.0140        | 0.0101           |
| Root;k_Bacteria;p_Firmicutes;c_Clostridia                     | 0.5290        | 0.3132             | 0.2267           | 0.0865        | 0.1295           |
| Root;k_Bacteria;p_Firmicutes;c_Erysipelotrichi                | 0.1505        | 0.0080             | 0.0018           | 0.0063        | 0.0038           |
| Root;k_Bacteria;p_Planctomycetes;c_Planctomycetia             |               |                    |                  |               |                  |
| Root;k_Bacteria;p_Proteobacteria;c_Alphaproteobacteria        | 0.2464        | 0.0000             | 0.0005           | -0.0005       | 0.0004           |
| Root;k_Bacteria;p_Proteobacteria;c_Betaproteobacteria         | 0.8569        | 0.0257             | 0.0232           | 0.0025        | 0.0133           |
| <b>Root;k_Bacteria;p_Proteobacteria;c_Deltaproteobacteria</b> | <b>0.0183</b> | <b>0.0449</b>      | <b>0.0140</b>    | <b>0.0310</b> | <b>0.0096</b>    |
| Root;k_Bacteria;p_Proteobacteria;c_Epsilonproteobacteria      | 0.6125        | 0.3404             | 0.4634           | -0.1230       | 0.2303           |
| <b>Root;k_Bacteria;p_Proteobacteria;c_Gammaproteobacteria</b> | <b>0.0129</b> | <b>0.0008</b>      | <b>0.0000</b>    | <b>0.0007</b> | <b>0.0002</b>    |
| Root;k_Bacteria;p_TM7;c_TM7-3                                 | 0.9010        | 0.0001             | 0.0000           | 0.0000        | 0.0001           |
| Root;k_Bacteria;p_Tenericutes;c_Mollicutes                    | 0.7093        | 0.0103             | 0.0069           | 0.0034        | 0.0088           |
| Root;k_Bacteria;p_Verrucomicrobia;c_Verrucomicrobiae          | 0.2542        | 0.0086             | 0.0001           | 0.0086        | 0.0068           |

| Order level                                                               | P value | Mean water-treated | Mean CMC-treated | Difference | SE of difference |
|---------------------------------------------------------------------------|---------|--------------------|------------------|------------|------------------|
| Root;k_Bacteria;p_Actinobacteria;c_Actinobacteria;o_Actinomycetales       | 0.3559  | 0.0000             | 0.0001           | -0.0001    | 0.0001           |
| Root;k_Bacteria;p_Actinobacteria;c_Actinobacteria;o_Bifidobacteriales     | 0.1059  | 0.0004             | 0.0001           | 0.0004     | 0.0002           |
| Root;k_Bacteria;p_Actinobacteria;c_Thermoleophilia;o_Solirubrobacteriales |         |                    |                  |            |                  |
| Root;k_Bacteria;p_Bacteroidetes;c_Bacteroidia;o_Bacteroidales             | 0.8089  | 0.2254             | 0.2556           | -0.0302    | 0.1194           |
| Root;k_Bacteria;p_Bacteroidetes;c_Flavobacteriia;o_Flavobacteriales       | 0.3559  | 0.0001             | 0.0000           | 0.0001     | 0.0001           |
| Root;k_Bacteria;p_Bacteroidetes;c_Sphingobacteriia;o_Sphingobacteriales   |         |                    |                  |            |                  |

|                                                                                    |               |               |               |               |               |
|------------------------------------------------------------------------------------|---------------|---------------|---------------|---------------|---------------|
| Root;k_Bacteria;p_Cyanobacteria;c_4C0d-2;o_Y52                                     | 0.5536        | 0.0025        | 0.0041        | -0.0017       | 0.0026        |
| Root;k_Bacteria;p_Cyanobacteria;c_Chloroplast;o_Streptophyta                       |               |               |               |               |               |
| Root;k_Bacteria;p_Derribacteres;c_Derribacteres;o_Derribacterales                  | 0.1826        | 0.0023        | 0.0003        | 0.0020        | 0.0013        |
| Root;k_Bacteria;p_Firmicutes;c_Bacilli;o_                                          |               |               |               |               |               |
| Root;k_Bacteria;p_Firmicutes;c_Bacilli;o_Bacillales                                |               |               |               |               |               |
| Root;k_Bacteria;p_Firmicutes;c_Bacilli;o_Lactobacillales                           | 0.2698        | 0.0157        | 0.0033        | 0.0123        | 0.0101        |
| <b>Root;k_Bacteria;p_Firmicutes;c_Bacilli;o_Turicibacterales</b>                   | <b>0.0081</b> | <b>0.0016</b> | <b>0.0000</b> | <b>0.0016</b> | <b>0.0004</b> |
| Root;k_Bacteria;p_Firmicutes;c_Clostridia;o_                                       | 0.1885        | 0.0127        | 0.0054        | 0.0074        | 0.0050        |
| Root;k_Bacteria;p_Firmicutes;c_Clostridia;o_Clostridiales                          | 0.5420        | 0.2960        | 0.2160        | 0.0800        | 0.1238        |
| Root;k_Bacteria;p_Firmicutes;c_Clostridia;o_Coriobacteriales                       | 0.7977        | 0.0045        | 0.0054        | -0.0008       | 0.0032        |
| Root;k_Bacteria;p_Firmicutes;c_Erysipelotrichi;o_Erysipelotrichales                | 0.1505        | 0.0080        | 0.0018        | 0.0063        | 0.0038        |
| Root;k_Bacteria;p_Planctomycetes;c_Planctomycetia;o_Gemmatales                     |               |               |               |               |               |
| Root;k_Bacteria;p_Planctomycetes;c_Planctomycetia;o_Pirellulales                   |               |               |               |               |               |
| Root;k_Bacteria;p_Planctomycetes;c_Planctomycetia;o_Planctomycetales               |               |               |               |               |               |
| Root;k_Bacteria;p_Proteobacteria;c_Alphaproteobacteria;o_                          | 0.3559        | 0.0000        | 0.0000        | 0.0000        | 0.0000        |
| Root;k_Bacteria;p_Proteobacteria;c_Alphaproteobacteria;o_RF32                      | 0.2344        | 0.0000        | 0.0004        | -0.0004       | 0.0003        |
| Root;k_Bacteria;p_Proteobacteria;c_Alphaproteobacteria;o_Rhizobiales               |               |               |               |               |               |
| Root;k_Bacteria;p_Proteobacteria;c_Alphaproteobacteria;o_Rhodobacteriales          |               |               |               |               |               |
| Root;k_Bacteria;p_Proteobacteria;c_Alphaproteobacteria;o_Rickettsiales             |               |               |               |               |               |
| Root;k_Bacteria;p_Proteobacteria;c_Alphaproteobacteria;o_Sphingomonadales          |               |               |               |               |               |
| Root;k_Bacteria;p_Proteobacteria;c_Betaproteobacteria;o_Burkholderiales            | 0.8569        | 0.0257        | 0.0232        | 0.0025        | 0.0133        |
| Root;k_Bacteria;p_Proteobacteria;c_Betaproteobacteria;o_Methylophilales            |               |               |               |               |               |
| Root;k_Bacteria;p_Proteobacteria;c_Betaproteobacteria;o_Rhodocyclales              |               |               |               |               |               |
| <b>Root;k_Bacteria;p_Proteobacteria;c_Deltaproteobacteria;o_Desulfovibrionales</b> | <b>0.0183</b> | <b>0.0449</b> | <b>0.0140</b> | <b>0.0310</b> | <b>0.0096</b> |
| Root;k_Bacteria;p_Proteobacteria;c_Deltaproteobacteria;o_Myxococcales              |               |               |               |               |               |
| Root;k_Bacteria;p_Proteobacteria;c_Deltaproteobacteria;o_Spirobacillales           |               |               |               |               |               |
| Root;k_Bacteria;p_Proteobacteria;c_Epsilonproteobacteria;o_Campylobacteriales      | 0.6125        | 0.3404        | 0.4634        | -0.1230       | 0.2303        |
| Root;k_Bacteria;p_Proteobacteria;c_Gammaproteobacteria;o_Aeromonadales             |               |               |               |               |               |
| Root;k_Bacteria;p_Proteobacteria;c_Gammaproteobacteria;o_Enterobacteriales         | 0.1539        | 0.0005        | 0.0000        | 0.0005        | 0.0003        |
| Root;k_Bacteria;p_Proteobacteria;c_Gammaproteobacteria;o_Pasteurellales            |               |               |               |               |               |
| Root;k_Bacteria;p_Proteobacteria;c_Gammaproteobacteria;o_Pseudomonadales           | 0.3093        | 0.0002        | 0.0000        | 0.0001        | 0.0001        |
| Root;k_Bacteria;p_Proteobacteria;c_Gammaproteobacteria;o_Xanthomonadales           | 0.3559        | 0.0001        | 0.0000        | 0.0001        | 0.0001        |
| Root;k_Bacteria;p_TM7;c_TM7-3;o_CW040                                              | 0.9010        | 0.0001        | 0.0000        | 0.0000        | 0.0001        |
| Root;k_Bacteria;p_Tenericutes;c_Mollicutes;o_Acholeplasmatales                     |               |               |               |               |               |
| Root;k_Bacteria;p_Tenericutes;c_Mollicutes;o_Anaeroplasmatales                     |               |               |               |               |               |
| Root;k_Bacteria;p_Tenericutes;c_Mollicutes;o_Mycoplasmatales                       | 0.5795        | 0.0089        | 0.0042        | 0.0047        | 0.0081        |
| Root;k_Bacteria;p_Tenericutes;c_Mollicutes;o_RF39                                  | 0.3395        | 0.0014        | 0.0027        | -0.0013       | 0.0013        |
| Root;k_Bacteria;p_Verrucomicrobia;c_Verrucomicrobiae;o_Verrucomicrobiales          | 0.2542        | 0.0086        | 0.0001        | 0.0086        | 0.0068        |

| Family level                                                                            | P value | Mean water-treated | Mean CMC-treated | Difference | SE of difference |
|-----------------------------------------------------------------------------------------|---------|--------------------|------------------|------------|------------------|
| Root;k_Bacteria;p_Actinobacteria;c_Actinobacteria;o_Actinomycetales;f_                  |         |                    |                  |            |                  |
| Root;k_Bacteria;p_Actinobacteria;c_Actinobacteria;o_Actinomycetales;f_ACK-M1            | 0.3559  | 0.0000             | 0.0001           | -0.0001    | 0.0001           |
| Root;k_Bacteria;p_Actinobacteria;c_Actinobacteria;o_Actinomycetales;f_Brevibacteriaceae |         |                    |                  |            |                  |

|                                                                                                 |               |               |               |               |               |
|-------------------------------------------------------------------------------------------------|---------------|---------------|---------------|---------------|---------------|
| Root;k_Bacteria;p_Actinobacteria;c_Actinobacteria;o_Actinomycetales;f_Corynebacteriaceae        |               |               |               |               |               |
| Root;k_Bacteria;p_Actinobacteria;c_Actinobacteria;o_Actinomycetales;f_Dermabacteraceae          |               |               |               |               |               |
| Root;k_Bacteria;p_Actinobacteria;c_Actinobacteria;o_Actinomycetales;f_Frankiaceae               |               |               |               |               |               |
| Root;k_Bacteria;p_Actinobacteria;c_Actinobacteria;o_Actinomycetales;f_Kineosporiaceae           |               |               |               |               |               |
| Root;k_Bacteria;p_Actinobacteria;c_Actinobacteria;o_Actinomycetales;f_Microbacteriaceae         |               |               |               |               |               |
| Root;k_Bacteria;p_Actinobacteria;c_Actinobacteria;o_Actinomycetales;f_Micrococcaceae            |               |               |               |               |               |
| Root;k_Bacteria;p_Actinobacteria;c_Actinobacteria;o_Actinomycetales;f_Nocardiaceae              |               |               |               |               |               |
| Root;k_Bacteria;p_Actinobacteria;c_Actinobacteria;o_Actinomycetales;f_Promicromonosporaceae     |               |               |               |               |               |
| Root;k_Bacteria;p_Actinobacteria;c_Actinobacteria;o_Actinomycetales;f_Streptomycetaceae         |               |               |               |               |               |
| Root;k_Bacteria;p_Actinobacteria;c_Actinobacteria;o_Bifidobacteriales;f_                        |               |               |               |               |               |
| Root;k_Bacteria;p_Actinobacteria;c_Actinobacteria;o_Bifidobacteriales;f_Bifidobacteriaceae      | 0.1059        | 0.0004        | 0.0001        | 0.0004        | 0.0002        |
| Root;k_Bacteria;p_Actinobacteria;c_Thermoleophilia;o_Solirubrobacterales;f_Solirubrobacteraceae |               |               |               |               |               |
| Root;k_Bacteria;p_Bacteroidetes;c_Bacteroidia;o_Bacteroidales;f_                                | 0.2384        | 0.0108        | 0.0006        | 0.0101        | 0.0077        |
| Root;k_Bacteria;p_Bacteroidetes;c_Bacteroidia;o_Bacteroidales;f_Bacteroidaceae                  | 0.5428        | 0.0619        | 0.0351        | 0.0269        | 0.0416        |
| Root;k_Bacteria;p_Bacteroidetes;c_Bacteroidia;o_Bacteroidales;f_Porphyrimonadaceae              | 0.0810        | 0.0093        | 0.0012        | 0.0082        | 0.0039        |
| Root;k_Bacteria;p_Bacteroidetes;c_Bacteroidia;o_Bacteroidales;f_Prevotellaceae                  | 0.4652        | 0.0087        | 0.0050        | 0.0037        | 0.0048        |
| Root;k_Bacteria;p_Bacteroidetes;c_Bacteroidia;o_Bacteroidales;f_Rikenellaceae                   | 0.3223        | 0.0066        | 0.0028        | 0.0039        | 0.0036        |
| Root;k_Bacteria;p_Bacteroidetes;c_Bacteroidia;o_Bacteroidales;f_S24-7                           | 0.3805        | 0.1228        | 0.2071        | -0.0843       | 0.0891        |
| Root;k_Bacteria;p_Bacteroidetes;c_Bacteroidia;o_Bacteroidales;f_[Odoribacteraceae]              | 0.4886        | 0.0053        | 0.0038        | 0.0014        | 0.0019        |
| Root;k_Bacteria;p_Bacteroidetes;c_Flavobacteriia;o_Flavobacteriales;f_Cryomorphaceae            | 0.3559        | 0.0001        | 0.0000        | 0.0001        | 0.0001        |
| Root;k_Bacteria;p_Bacteroidetes;c_Flavobacteriia;o_Flavobacteriales;f_Flavobacteriaceae         |               |               |               |               |               |
| Root;k_Bacteria;p_Bacteroidetes;c_Sphingobacteriia;o_Sphingobacteriales;f_                      |               |               |               |               |               |
| Root;k_Bacteria;p_Bacteroidetes;c_Sphingobacteriia;o_Sphingobacteriales;f_Chitinophagaceae      |               |               |               |               |               |
| Root;k_Bacteria;p_Bacteroidetes;c_Sphingobacteriia;o_Sphingobacteriales;f_Flexibacteraceae      |               |               |               |               |               |
| Root;k_Bacteria;p_Cyanobacteria;c_4C0d-2;o_YS2;f_                                               | 0.5536        | 0.0025        | 0.0041        | -0.0017       | 0.0026        |
| Root;k_Bacteria;p_Cyanobacteria;c_Chloroplast;o_Streptophyta;f_                                 |               |               |               |               |               |
| Root;k_Bacteria;p_Deferribacteres;c_Deferribacteres;o_Deferribacterales;f_Deferribacteraceae    | 0.1826        | 0.0023        | 0.0003        | 0.0020        | 0.0013        |
| Root;k_Bacteria;p_Firmicutes;c_Bacilli;o_;                                                      |               |               |               |               |               |
| Root;k_Bacteria;p_Firmicutes;c_Bacilli;o_Bacillales;f_                                          |               |               |               |               |               |
| Root;k_Bacteria;p_Firmicutes;c_Bacilli;o_Bacillales;f_Alicyclobacillaceae                       |               |               |               |               |               |
| Root;k_Bacteria;p_Firmicutes;c_Bacilli;o_Bacillales;f_Bacillaceae                               |               |               |               |               |               |
| Root;k_Bacteria;p_Firmicutes;c_Bacilli;o_Bacillales;f_Paenibacillaceae                          |               |               |               |               |               |
| Root;k_Bacteria;p_Firmicutes;c_Bacilli;o_Bacillales;f_Planococcaceae                            |               |               |               |               |               |
| Root;k_Bacteria;p_Firmicutes;c_Bacilli;o_Bacillales;f_Staphylococcaceae                         |               |               |               |               |               |
| Root;k_Bacteria;p_Firmicutes;c_Bacilli;o_Bacillales;f_Thermoactinomycetaceae                    |               |               |               |               |               |
| Root;k_Bacteria;p_Firmicutes;c_Bacilli;o_Lactobacillales;f_                                     |               |               |               |               |               |
| Root;k_Bacteria;p_Firmicutes;c_Bacilli;o_Lactobacillales;f_Aerococcaceae                        | 0.8848        | 0.0001        | 0.0000        | 0.0000        | 0.0001        |
| Root;k_Bacteria;p_Firmicutes;c_Bacilli;o_Lactobacillales;f_Carnobacteriaceae                    |               |               |               |               |               |
| Root;k_Bacteria;p_Firmicutes;c_Bacilli;o_Lactobacillales;f_Enterococcaceae                      |               |               |               |               |               |
| Root;k_Bacteria;p_Firmicutes;c_Bacilli;o_Lactobacillales;f_Lactobacillaceae                     | 0.2710        | 0.0156        | 0.0033        | 0.0123        | 0.0101        |
| Root;k_Bacteria;p_Firmicutes;c_Bacilli;o_Lactobacillales;f_Leuconostocaceae                     |               |               |               |               |               |
| Root;k_Bacteria;p_Firmicutes;c_Bacilli;o_Lactobacillales;f_Streptococcaceae                     | 0.3559        | 0.0001        | 0.0000        | 0.0001        | 0.0001        |
| <b>Root;k_Bacteria;p_Firmicutes;c_Bacilli;o_Turicibacterales;f_Turicibacteraceae</b>            | <b>0.0081</b> | <b>0.0016</b> | <b>0.0000</b> | <b>0.0016</b> | <b>0.0004</b> |



|                                                                                                          |               |               |               |               |               |
|----------------------------------------------------------------------------------------------------------|---------------|---------------|---------------|---------------|---------------|
| Root;k_Bacteria;p_Firmicutes;c_Clostridia;o_ ;f_                                                         | 0.1885        | 0.0127        | 0.0054        | 0.0074        | 0.0050        |
| Root;k_Bacteria;p_Firmicutes;c_Clostridia;o_Clostridiales;f_                                             | 0.5080        | 0.0033        | 0.0014        | 0.0019        | 0.0028        |
| Root;k_Bacteria;p_Firmicutes;c_Clostridia;o_Clostridiales;f_Clostridiaceae                               | 0.6910        | 0.0023        | 0.0018        | 0.0004        | 0.0010        |
| Root;k_Bacteria;p_Firmicutes;c_Clostridia;o_Clostridiales;f_Dehalobacteriaceae                           | 0.4202        | 0.0007        | 0.0012        | -0.0005       | 0.0006        |
| Root;k_Bacteria;p_Firmicutes;c_Clostridia;o_Clostridiales;f_Eubacteriaceae                               |               |               |               |               |               |
| Root;k_Bacteria;p_Firmicutes;c_Clostridia;o_Clostridiales;f_Lachnospiraceae                              | 0.4309        | 0.1980        | 0.1312        | 0.0667        | 0.0791        |
| Root;k_Bacteria;p_Firmicutes;c_Clostridia;o_Clostridiales;f_Peptococcaceae                               |               |               |               |               |               |
| Root;k_Bacteria;p_Firmicutes;c_Clostridia;o_Clostridiales;f_Peptostreptococcaceae                        |               |               |               |               |               |
| Root;k_Bacteria;p_Firmicutes;c_Clostridia;o_Clostridiales;f_Ruminococcaceae                              | 0.8055        | 0.0917        | 0.0803        | 0.0114        | 0.0442        |
| Root;k_Bacteria;p_Firmicutes;c_Clostridia;o_Coriobacteriales;f_                                          | 0.8314        | 0.0044        | 0.0050        | -0.0007       | 0.0031        |
| Root;k_Bacteria;p_Firmicutes;c_Clostridia;o_Coriobacteriales;f_Coriobacteriaceae                         | 0.6239        | 0.0002        | 0.0003        | -0.0002       | 0.0003        |
| Root;k_Bacteria;p_Firmicutes;c_Erysipelotrichi;o_Erysipelotrichales;f_Erysipelotrichaceae                | 0.1348        | 0.0056        | 0.0018        | 0.0038        | 0.0022        |
| Root;k_Bacteria;p_Firmicutes;c_Erysipelotrichi;o_Erysipelotrichales;f_[Coprobacillaceae]                 | 0.2982        | 0.0025        | 0.0000        | 0.0025        | 0.0022        |
| Root;k_Bacteria;p_Planctomycetes;c_Planctomycetia;o_Gemmatales;f_Gemmataceae                             |               |               |               |               |               |
| Root;k_Bacteria;p_Planctomycetes;c_Planctomycetia;o_Pirellulales;f_Pirellulaceae                         |               |               |               |               |               |
| Root;k_Bacteria;p_Planctomycetes;c_Planctomycetia;o_Planctomycetales;f_Planctomycetaceae                 |               |               |               |               |               |
| Root;k_Bacteria;p_Proteobacteria;c_Alphaproteobacteria;o_ ;f_                                            | 0.3559        | 0.0000        | 0.0000        | 0.0000        | 0.0000        |
| Root;k_Bacteria;p_Proteobacteria;c_Alphaproteobacteria;o_RF32;f_                                         | 0.2344        | 0.0000        | 0.0004        | -0.0004       | 0.0003        |
| Root;k_Bacteria;p_Proteobacteria;c_Alphaproteobacteria;o_Rhizobiales;f_Brucellaceae                      |               |               |               |               |               |
| Root;k_Bacteria;p_Proteobacteria;c_Alphaproteobacteria;o_Rhizobiales;f_Hyphomicrobiaceae                 |               |               |               |               |               |
| Root;k_Bacteria;p_Proteobacteria;c_Alphaproteobacteria;o_Rhizobiales;f_Methylobacteriaceae               |               |               |               |               |               |
| Root;k_Bacteria;p_Proteobacteria;c_Alphaproteobacteria;o_Rhizobiales;f_Rhizobiaceae                      |               |               |               |               |               |
| Root;k_Bacteria;p_Proteobacteria;c_Alphaproteobacteria;o_Rhodobacterales;f_Rhodobacteraceae              |               |               |               |               |               |
| Root;k_Bacteria;p_Proteobacteria;c_Alphaproteobacteria;o_Rickettsiales;f_mitochondria                    |               |               |               |               |               |
| Root;k_Bacteria;p_Proteobacteria;c_Alphaproteobacteria;o_Sphingomonadales;f_Sphingomonadaceae            |               |               |               |               |               |
| Root;k_Bacteria;p_Proteobacteria;c_Betaproteobacteria;o_Burkholderiales;f_Alcaligenaceae                 | 0.8552        | 0.0257        | 0.0231        | 0.0025        | 0.0134        |
| Root;k_Bacteria;p_Proteobacteria;c_Betaproteobacteria;o_Burkholderiales;f_Burkholderiaceae               |               |               |               |               |               |
| Root;k_Bacteria;p_Proteobacteria;c_Betaproteobacteria;o_Burkholderiales;f_Comamonadaceae                 | 0.3559        | 0.0000        | 0.0000        | 0.0000        | 0.0000        |
| Root;k_Bacteria;p_Proteobacteria;c_Betaproteobacteria;o_Burkholderiales;f_Oxalobacteraceae               |               |               |               |               |               |
| Root;k_Bacteria;p_Proteobacteria;c_Betaproteobacteria;o_Methylophilales;f_Methylophilaceae               |               |               |               |               |               |
| Root;k_Bacteria;p_Proteobacteria;c_Betaproteobacteria;o_Rhodocyclales;f_Rhodocyclaceae                   |               |               |               |               |               |
| <b>Root;k_Bacteria;p_Proteobacteria;c_Deltaproteobacteria;o_Desulfovibrionales;f_Desulfovibrionaceae</b> | <b>0.0183</b> | <b>0.0449</b> | <b>0.0140</b> | <b>0.0310</b> | <b>0.0096</b> |
| Root;k_Bacteria;p_Proteobacteria;c_Deltaproteobacteria;o_Myxococcales;f_                                 |               |               |               |               |               |
| Root;k_Bacteria;p_Proteobacteria;c_Deltaproteobacteria;o_Myxococcales;f_Nannocystaceae                   |               |               |               |               |               |
| Root;k_Bacteria;p_Proteobacteria;c_Deltaproteobacteria;o_Spirobacillales;f_                              |               |               |               |               |               |
| Root;k_Bacteria;p_Proteobacteria;c_Epsilonproteobacteria;o_Campylobacterales;f_Helicobacteraceae         | 0.6125        | 0.3404        | 0.4634        | -0.1230       | 0.2303        |
| Root;k_Bacteria;p_Proteobacteria;c_Gammaproteobacteria;o_Aeromonadales;f_                                |               |               |               |               |               |
| Root;k_Bacteria;p_Proteobacteria;c_Gammaproteobacteria;o_Aeromonadales;f_Aeromonadaceae                  |               |               |               |               |               |
| Root;k_Bacteria;p_Proteobacteria;c_Gammaproteobacteria;o_Enterobacteriales;f_Enterobacteriaceae          | 0.1539        | 0.0005        | 0.0000        | 0.0005        | 0.0003        |
| Root;k_Bacteria;p_Proteobacteria;c_Gammaproteobacteria;o_Pasteurellales;f_Pasteurellaceae                |               |               |               |               |               |
| Root;k_Bacteria;p_Proteobacteria;c_Gammaproteobacteria;o_Pseudomonadales;f_Moraxellaceae                 | 0.3093        | 0.0002        | 0.0000        | 0.0001        | 0.0001        |
| Root;k_Bacteria;p_Proteobacteria;c_Gammaproteobacteria;o_Pseudomonadales;f_Pseudomonadaceae              |               |               |               |               |               |
| Root;k_Bacteria;p_Proteobacteria;c_Gammaproteobacteria;o_Xanthomonadales;f_Xanthomonadaceae              | 0.3559        | 0.0001        | 0.0000        | 0.0001        | 0.0001        |

|                                                                                                      |        |        |        |         |        |
|------------------------------------------------------------------------------------------------------|--------|--------|--------|---------|--------|
| Root;k__Bacteria;p__TM7;c__TM7-3;o__CW040;f__F16                                                     | 0.9010 | 0.0001 | 0.0000 | 0.0000  | 0.0001 |
| Root;k__Bacteria;p__Tenericutes;c__Mollicutes;o__Acholeplasmatales;f__Acholeplasmataceae             |        |        |        |         |        |
| Root;k__Bacteria;p__Tenericutes;c__Mollicutes;o__Anaeroplasmatales;f__Anaeroplasmataceae             |        |        |        |         |        |
| Root;k__Bacteria;p__Tenericutes;c__Mollicutes;o__Mycoplasmatales;f__Mycoplasmataceae                 | 0.5795 | 0.0089 | 0.0042 | 0.0047  | 0.0081 |
| Root;k__Bacteria;p__Tenericutes;c__Mollicutes;o__RF39;f__                                            | 0.3395 | 0.0014 | 0.0027 | -0.0013 | 0.0013 |
| Root;k__Bacteria;p__Verrucomicrobia;c__Verrucomicrobiae;o__Verrucomicrobiales;f__Verrucomicrobiaceae | 0.2542 | 0.0086 | 0.0001 | 0.0086  | 0.0068 |

**TLR5<sup>-/-</sup> water versus TLR5<sup>-/-</sup> P80 - Feces**

| Phyla level                            | P value       | Mean water-treated | Mean P80-treated | Difference    | SE of difference |
|----------------------------------------|---------------|--------------------|------------------|---------------|------------------|
| Root;k_Bacteria;p_Actinobacteria       | 0.1015        | 0.0036             | 0.0183           | -0.0147       | 0.0073           |
| Root;k_Bacteria;p_Bacteroidetes        | 0.0937        | 0.4535             | 0.5745           | -0.1210       | 0.0585           |
| <b>Root;k_Bacteria;p_Cyanobacteria</b> | <b>0.0344</b> | <b>0.0031</b>      | <b>0.0009</b>    | <b>0.0022</b> | <b>0.0008</b>    |
| Root;k_Bacteria;p_Deferribacteres      | 0.3627        | 0.0004             | 0.0001           | 0.0004        | 0.0004           |
| Root;k_Bacteria;p_Firmicutes           | 0.1481        | 0.4094             | 0.2880           | 0.1214        | 0.0711           |
| Root;k_Bacteria;p_Planctomycetes       |               |                    |                  |               |                  |
| Root;k_Bacteria;p_Proteobacteria       | 0.9333        | 0.1193             | 0.1159           | 0.0034        | 0.0385           |
| Root;k_Bacteria;p_TM7                  | 0.2471        | 0.0002             | 0.0000           | 0.0002        | 0.0001           |
| <b>Root;k_Bacteria;p_Tenericutes</b>   | <b>0.0246</b> | <b>0.0064</b>      | <b>0.0013</b>    | <b>0.0051</b> | <b>0.0016</b>    |
| Root;k_Bacteria;p_Verrucomicrobia      | 0.2505        | 0.0041             | 0.0010           | 0.0030        | 0.0023           |

| Class level                                               | P value            | Mean water-treated | Mean P80-treated | Difference     | SE of difference |
|-----------------------------------------------------------|--------------------|--------------------|------------------|----------------|------------------|
| Root;k_Bacteria;p_Actinobacteria;c_Actinobacteria         | 0.1015             | 0.0036             | 0.0183           | -0.0147        | 0.0073           |
| <b>Root;k_Bacteria;p_Actinobacteria;c_Thermoleophilia</b> | <b>0.0003</b>      | <b>0.4535</b>      | <b>0.0000</b>    | <b>0.4535</b>  | <b>0.0492</b>    |
| <b>Root;k_Bacteria;p_Bacteroidetes;c_Bacteroidia</b>      | <b>&lt; 0.0001</b> | <b>0.0031</b>      | <b>0.5745</b>    | <b>-0.5714</b> | <b>0.0317</b>    |
| Root;k_Bacteria;p_Bacteroidetes;c_Flavobacteriia          | 0.2844             | 0.0004             | 0.0000           | 0.0004         | 0.0004           |
| <b>Root;k_Bacteria;p_Bacteroidetes;c_Sphingobacteriia</b> | <b>0.0015</b>      | <b>0.4094</b>      | <b>0.0000</b>    | <b>0.4094</b>  | <b>0.0656</b>    |
| <b>Root;k_Bacteria;p_Cyanobacteria;c_4C0d-2</b>           | <b>0.0251</b>      | <b>0.0000</b>      | <b>0.0008</b>    | <b>-0.0008</b> | <b>0.0003</b>    |
| <b>Root;k_Bacteria;p_Cyanobacteria;c_Chloroplast</b>      | <b>0.0252</b>      | <b>0.1193</b>      | <b>0.0001</b>    | <b>0.1193</b>  | <b>0.0378</b>    |
| Root;k_Bacteria;p_Deferribacteres;c_Deferribacteres       | 0.5015             | 0.0002             | 0.0001           | 0.0001         | 0.0001           |
| Root;k_Bacteria;p_Firmicutes;c_Bacilli                    | 0.0740             | 0.0064             | 0.0736           | -0.0672        | 0.0298           |
| <b>Root;k_Bacteria;p_Firmicutes;c_Clostridia</b>          | <b>0.0002</b>      | <b>0.0041</b>      | <b>0.0861</b>    | <b>-0.0820</b> | <b>0.0086</b>    |
| Root;k_Bacteria;p_Firmicutes;c_Erysipelotrichi            |                    |                    |                  |                |                  |
| Root;k_Bacteria;p_Planctomycetes;c_Planctomycetia         |                    |                    |                  |                |                  |
| Root;k_Bacteria;p_Proteobacteria;c_Alphaproteobacteria    |                    |                    |                  |                |                  |
| Root;k_Bacteria;p_Proteobacteria;c_Betaproteobacteria     |                    |                    |                  |                |                  |
| Root;k_Bacteria;p_Proteobacteria;c_Deltaproteobacteria    | 0.0685             | 0.0482             | 0.0101           | 0.0381         | 0.0165           |
| Root;k_Bacteria;p_Proteobacteria;c_Epsilonproteobacteria  | 0.1375             | 0.0204             | 0.0481           | -0.0277        | 0.0157           |
| Root;k_Bacteria;p_Proteobacteria;c_Gammaproteobacteria    |                    |                    |                  |                |                  |
| <b>Root;k_Bacteria;p_TM7;c_TM7-3</b>                      | <b>0.0043</b>      | <b>0.0003</b>      | <b>0.0000</b>    | <b>0.0003</b>  | <b>0.0001</b>    |
| Root;k_Bacteria;p_Tenericutes;c_Mollicutes                | 0.0577             | 0.0073             | 0.0013           | 0.0059         | 0.0024           |
| Root;k_Bacteria;p_Verrucomicrobia;c_Verrucomicrobiae      | 0.2445             | 0.0000             | 0.0010           | -0.0010        | 0.0008           |

| Order level                                                               | P value       | Mean water-treated | Mean P80-treated | Difference     | SE of difference |
|---------------------------------------------------------------------------|---------------|--------------------|------------------|----------------|------------------|
| Root;k_Bacteria;p_Actinobacteria;c_Actinobacteria;o_Actinomycetales       |               |                    |                  |                |                  |
| Root;k_Bacteria;p_Actinobacteria;c_Actinobacteria;o_Bifidobacteriales     | 0.1302        | 0.0056             | 0.0183           | -0.0126        | 0.0070           |
| Root;k_Bacteria;p_Actinobacteria;c_Thermoleophilia;o_Solirubrobacteriales |               |                    |                  |                |                  |
| <b>Root;k_Bacteria;p_Bacteroidetes;c_Bacteroidia;o_Bacteroidales</b>      | <b>0.0068</b> | <b>0.4175</b>      | <b>0.5745</b>    | <b>-0.1570</b> | <b>0.0354</b>    |
| Root;k_Bacteria;p_Bacteroidetes;c_Flavobacteriia;o_Flavobacteriales       |               |                    |                  |                |                  |
| Root;k_Bacteria;p_Bacteroidetes;c_Sphingobacteriia;o_Sphingobacteriales   |               |                    |                  |                |                  |

|                                                                                |               |               |               |                |               |
|--------------------------------------------------------------------------------|---------------|---------------|---------------|----------------|---------------|
| Root;k_Bacteria;p_Cyanobacteria;c_4C0d-2;o_Y52                                 | 0.7096        | 0.0010        | 0.0008        | 0.0001         | 0.0004        |
| Root;k_Bacteria;p_Cyanobacteria;c_Chloroplast;o_Streptophyta                   | 0.2902        | 0.0003        | 0.0001        | 0.0002         | 0.0002        |
| Root;k_Bacteria;p_Derribacteres;c_Derribacteres;o_Derribacterales              | 0.8746        | 0.0001        | 0.0001        | 0.0000         | 0.0001        |
| Root;k_Bacteria;p_Firmicutes;c_Bacilli;o_                                      |               |               |               |                |               |
| Root;k_Bacteria;p_Firmicutes;c_Bacilli;o_Bacillales                            | 0.2856        | 0.0000        | 0.0001        | -0.0001        | 0.0001        |
| Root;k_Bacteria;p_Firmicutes;c_Bacilli;o_Lactobacillales                       | 0.9079        | 0.0668        | 0.0637        | 0.0031         | 0.0253        |
| Root;k_Bacteria;p_Firmicutes;c_Bacilli;o_Turicibacterales                      | 0.2058        | 0.0283        | 0.0098        | 0.0185         | 0.0127        |
| <b>Root;k_Bacteria;p_Firmicutes;c_Clostridia;o_</b>                            | <b>0.0017</b> | <b>0.0262</b> | <b>0.0023</b> | <b>0.0239</b>  | <b>0.0039</b> |
| <b>Root;k_Bacteria;p_Firmicutes;c_Clostridia;o_Clostridiales</b>               | <b>0.0009</b> | <b>0.3161</b> | <b>0.0797</b> | <b>0.2364</b>  | <b>0.0333</b> |
| <b>Root;k_Bacteria;p_Firmicutes;c_Clostridia;o_Coriobacteriales</b>            | <b>0.0013</b> | <b>0.0157</b> | <b>0.0041</b> | <b>0.0116</b>  | <b>0.0018</b> |
| <b>Root;k_Bacteria;p_Firmicutes;c_Erysipelotrichi;o_Erysipelotrichales</b>     | <b>0.0211</b> | <b>0.0371</b> | <b>0.1283</b> | <b>-0.0912</b> | <b>0.0275</b> |
| Root;k_Bacteria;p_Planctomycetes;c_Planctomycetia;o_Gemmatales                 |               |               |               |                |               |
| Root;k_Bacteria;p_Planctomycetes;c_Planctomycetia;o_Pirellulales               |               |               |               |                |               |
| Root;k_Bacteria;p_Planctomycetes;c_Planctomycetia;o_Planctomycetales           |               |               |               |                |               |
| Root;k_Bacteria;p_Proteobacteria;c_Alphaproteobacteria;o_                      |               |               |               |                |               |
| Root;k_Bacteria;p_Proteobacteria;c_Alphaproteobacteria;o_RF32                  | 0.8630        | 0.0001        | 0.0001        | 0.0000         | 0.0001        |
| Root;k_Bacteria;p_Proteobacteria;c_Alphaproteobacteria;o_Rhizobiales           |               |               |               |                |               |
| Root;k_Bacteria;p_Proteobacteria;c_Alphaproteobacteria;o_Rhodobacterales       |               |               |               |                |               |
| Root;k_Bacteria;p_Proteobacteria;c_Alphaproteobacteria;o_Rickettsiales         |               |               |               |                |               |
| Root;k_Bacteria;p_Proteobacteria;c_Alphaproteobacteria;o_Sphingomonadales      |               |               |               |                |               |
| <b>Root;k_Bacteria;p_Proteobacteria;c_Betaproteobacteria;o_Burkholderiales</b> | <b>0.0003</b> | <b>0.0092</b> | <b>0.0577</b> | <b>-0.0485</b> | <b>0.0054</b> |
| Root;k_Bacteria;p_Proteobacteria;c_Betaproteobacteria;o_Methylophilales        |               |               |               |                |               |
| Root;k_Bacteria;p_Proteobacteria;c_Betaproteobacteria;o_Rhodocyclales          |               |               |               |                |               |
| Root;k_Bacteria;p_Proteobacteria;c_Deltaproteobacteria;o_Desulfovibrionales    | 0.0685        | 0.0482        | 0.0101        | 0.0381         | 0.0165        |
| Root;k_Bacteria;p_Proteobacteria;c_Deltaproteobacteria;o_Myxococcales          |               |               |               |                |               |
| Root;k_Bacteria;p_Proteobacteria;c_Deltaproteobacteria;o_Spirobacillales       |               |               |               |                |               |
| Root;k_Bacteria;p_Proteobacteria;c_Epsilonproteobacteria;o_Campylobacterales   | 0.1375        | 0.0204        | 0.0481        | -0.0277        | 0.0157        |
| Root;k_Bacteria;p_Proteobacteria;c_Gammaproteobacteria;o_Aeromonadales         |               |               |               |                |               |
| Root;k_Bacteria;p_Proteobacteria;c_Gammaproteobacteria;o_Enterobacteriales     |               |               |               |                |               |
| Root;k_Bacteria;p_Proteobacteria;c_Gammaproteobacteria;o_Pasteurellales        |               |               |               |                |               |
| Root;k_Bacteria;p_Proteobacteria;c_Gammaproteobacteria;o_Pseudomonadales       |               |               |               |                |               |
| Root;k_Bacteria;p_Proteobacteria;c_Gammaproteobacteria;o_Xanthomonadales       |               |               |               |                |               |
| <b>Root;k_Bacteria;p_TM7;c_TM7-3;o_CW040</b>                                   | <b>0.0043</b> | <b>0.0003</b> | <b>0.0000</b> | <b>0.0003</b>  | <b>0.0001</b> |
| Root;k_Bacteria;p_Tenericutes;c_Mollicutes;o_Acholeplasmatales                 |               |               |               |                |               |
| Root;k_Bacteria;p_Tenericutes;c_Mollicutes;o_Anaeroplasmatales                 |               |               |               |                |               |
| Root;k_Bacteria;p_Tenericutes;c_Mollicutes;o_Mycoplasmatales                   | 0.0505        | 0.0070        | 0.0008        | 0.0061         | 0.0024        |
| Root;k_Bacteria;p_Tenericutes;c_Mollicutes;o_RF39                              | 0.4904        | 0.0003        | 0.0005        | -0.0002        | 0.0003        |
| Root;k_Bacteria;p_Verrucomicrobia;c_Verrucomicrobiae;o_Verrucomicrobiales      | 0.2445        | 0.0000        | 0.0010        | -0.0010        | 0.0008        |

| Family level                                                                            | P value | Mean water-treated | Mean P80-treated | Difference | SE of difference |
|-----------------------------------------------------------------------------------------|---------|--------------------|------------------|------------|------------------|
| Root;k_Bacteria;p_Actinobacteria;c_Actinobacteria;o_Actinomycetales;f_                  |         |                    |                  |            |                  |
| Root;k_Bacteria;p_Actinobacteria;c_Actinobacteria;o_Actinomycetales;f_ACK-M1            |         |                    |                  |            |                  |
| Root;k_Bacteria;p_Actinobacteria;c_Actinobacteria;o_Actinomycetales;f_Brevibacteriaceae |         |                    |                  |            |                  |

|                                                                                                 |               |               |               |                |               |
|-------------------------------------------------------------------------------------------------|---------------|---------------|---------------|----------------|---------------|
| Root;k_Bacteria;p_Actinobacteria;c_Actinobacteria;o_Actinomycetales;f_Corynebacteriaceae        |               |               |               |                |               |
| Root;k_Bacteria;p_Actinobacteria;c_Actinobacteria;o_Actinomycetales;f_Dermabacteraceae          |               |               |               |                |               |
| Root;k_Bacteria;p_Actinobacteria;c_Actinobacteria;o_Actinomycetales;f_Frankiaceae               |               |               |               |                |               |
| Root;k_Bacteria;p_Actinobacteria;c_Actinobacteria;o_Actinomycetales;f_Kineosporiaceae           |               |               |               |                |               |
| Root;k_Bacteria;p_Actinobacteria;c_Actinobacteria;o_Actinomycetales;f_Microbacteriaceae         |               |               |               |                |               |
| Root;k_Bacteria;p_Actinobacteria;c_Actinobacteria;o_Actinomycetales;f_Micrococcaceae            |               |               |               |                |               |
| Root;k_Bacteria;p_Actinobacteria;c_Actinobacteria;o_Actinomycetales;f_Nocardiaceae              |               |               |               |                |               |
| Root;k_Bacteria;p_Actinobacteria;c_Actinobacteria;o_Actinomycetales;f_Promicromonosporaceae     |               |               |               |                |               |
| Root;k_Bacteria;p_Actinobacteria;c_Actinobacteria;o_Actinomycetales;f_Streptomycetaceae         |               |               |               |                |               |
| Root;k_Bacteria;p_Actinobacteria;c_Actinobacteria;o_Bifidobacteriales;f_                        |               |               |               |                |               |
| Root;k_Bacteria;p_Actinobacteria;c_Actinobacteria;o_Bifidobacteriales;f_Bifidobacteriaceae      | 0.1302        | 0.0056        | 0.0183        | -0.0126        | 0.0070        |
| Root;k_Bacteria;p_Actinobacteria;c_Thermoleophilia;o_Solirubrobacterales;f_Solirubrobacteraceae |               |               |               |                |               |
| Root;k_Bacteria;p_Bacteroidetes;c_Bacteroidia;o_Bacteroidales;f_                                | 0.4963        | 0.0003        | 0.0007        | -0.0004        | 0.0005        |
| Root;k_Bacteria;p_Bacteroidetes;c_Bacteroidia;o_Bacteroidales;f_Bacteroidaceae                  | 0.4404        | 0.0410        | 0.0525        | -0.0115        | 0.0137        |
| Root;k_Bacteria;p_Bacteroidetes;c_Bacteroidia;o_Bacteroidales;f_Porphyrimonadaceae              | 0.1008        | 0.0032        | 0.0089        | -0.0057        | 0.0028        |
| <b>Root;k_Bacteria;p_Bacteroidetes;c_Bacteroidia;o_Bacteroidales;f_Prevotellaceae</b>           | <b>0.0137</b> | <b>0.0202</b> | <b>0.0009</b> | <b>0.0192</b>  | <b>0.0052</b> |
| Root;k_Bacteria;p_Bacteroidetes;c_Bacteroidia;o_Bacteroidales;f_Rikenellaceae                   | 0.0980        | 0.0121        | 0.0024        | 0.0096         | 0.0047        |
| <b>Root;k_Bacteria;p_Bacteroidetes;c_Bacteroidia;o_Bacteroidales;f_S24-7</b>                    | <b>0.0153</b> | <b>0.3380</b> | <b>0.5064</b> | <b>-0.1685</b> | <b>0.0466</b> |
| Root;k_Bacteria;p_Bacteroidetes;c_Bacteroidia;o_Bacteroidales;f_[Odoribacteraceae]              | 0.8902        | 0.0027        | 0.0026        | 0.0001         | 0.0008        |
| Root;k_Bacteria;p_Bacteroidetes;c_Flavobacteriia;o_Flavobacteriales;f_Cryomorphaceae            |               |               |               |                |               |
| Root;k_Bacteria;p_Bacteroidetes;c_Flavobacteriia;o_Flavobacteriales;f_Flavobacteriaceae         |               |               |               |                |               |
| Root;k_Bacteria;p_Bacteroidetes;c_Sphingobacteriia;o_Sphingobacteriales;f_                      |               |               |               |                |               |
| Root;k_Bacteria;p_Bacteroidetes;c_Sphingobacteriia;o_Sphingobacteriales;f_Chitinophagaceae      |               |               |               |                |               |
| Root;k_Bacteria;p_Bacteroidetes;c_Sphingobacteriia;o_Sphingobacteriales;f_Flexibacteraceae      |               |               |               |                |               |
| Root;k_Bacteria;p_Cyanobacteria;c_4C0d-2;o_YS2;f_                                               | 0.7096        | 0.0010        | 0.0008        | 0.0001         | 0.0004        |
| Root;k_Bacteria;p_Cyanobacteria;c_Chloroplast;o_Streptophyta;f_                                 | 0.2902        | 0.0003        | 0.0001        | 0.0002         | 0.0002        |
| Root;k_Bacteria;p_Deferribacteres;c_Deferribacteres;o_Deferribacterales;f_Deferribacteraceae    | 0.8746        | 0.0001        | 0.0001        | 0.0000         | 0.0001        |
| Root;k_Bacteria;p_Firmicutes;c_Bacilli;o_;                                                      |               |               |               |                |               |
| Root;k_Bacteria;p_Firmicutes;c_Bacilli;o_Bacillales;f_                                          |               |               |               |                |               |
| Root;k_Bacteria;p_Firmicutes;c_Bacilli;o_Bacillales;f_Alicyclobacillaceae                       |               |               |               |                |               |
| Root;k_Bacteria;p_Firmicutes;c_Bacilli;o_Bacillales;f_Bacillaceae                               |               |               |               |                |               |
| Root;k_Bacteria;p_Firmicutes;c_Bacilli;o_Bacillales;f_Paenibacillaceae                          |               |               |               |                |               |
| Root;k_Bacteria;p_Firmicutes;c_Bacilli;o_Bacillales;f_Planococcaceae                            |               |               |               |                |               |
| Root;k_Bacteria;p_Firmicutes;c_Bacilli;o_Bacillales;f_Staphylococcaceae                         | 0.2856        | 0.0000        | 0.0001        | -0.0001        | 0.0001        |
| Root;k_Bacteria;p_Firmicutes;c_Bacilli;o_Bacillales;f_Thermoactinomycetaceae                    |               |               |               |                |               |
| Root;k_Bacteria;p_Firmicutes;c_Bacilli;o_Lactobacillales;f_                                     |               |               |               |                |               |
| Root;k_Bacteria;p_Firmicutes;c_Bacilli;o_Lactobacillales;f_Aerococcaceae                        |               |               |               |                |               |
| Root;k_Bacteria;p_Firmicutes;c_Bacilli;o_Lactobacillales;f_Carnobacteriaceae                    |               |               |               |                |               |
| Root;k_Bacteria;p_Firmicutes;c_Bacilli;o_Lactobacillales;f_Enterococcaceae                      | 0.2856        | 0.0000        | 0.0001        | -0.0001        | 0.0001        |
| Root;k_Bacteria;p_Firmicutes;c_Bacilli;o_Lactobacillales;f_Lactobacillaceae                     | 0.8952        | 0.0667        | 0.0632        | 0.0035         | 0.0251        |
| Root;k_Bacteria;p_Firmicutes;c_Bacilli;o_Lactobacillales;f_Leuconostocaceae                     |               |               |               |                |               |
| Root;k_Bacteria;p_Firmicutes;c_Bacilli;o_Lactobacillales;f_Streptococcaceae                     | 0.2620        | 0.0000        | 0.0004        | -0.0003        | 0.0003        |
| Root;k_Bacteria;p_Firmicutes;c_Bacilli;o_Turicibacterales;f_Turicibacteraceae                   | 0.2058        | 0.0283        | 0.0098        | 0.0185         | 0.0127        |

Chassaing et al, Supplemental Table 1.

|                                                                                                   |               |               |               |                |               |
|---------------------------------------------------------------------------------------------------|---------------|---------------|---------------|----------------|---------------|
| <b>Root;k_Bacteria;p_Firmicutes;c_Clostridia;o_;</b> f__                                          | <b>0.0017</b> | <b>0.0262</b> | <b>0.0023</b> | <b>0.0239</b>  | <b>0.0039</b> |
| Root;k_Bacteria;p_Firmicutes;c_Clostridia;o_Clostridiales;f__                                     | 0.3867        | 0.0007        | 0.0004        | 0.0002         | 0.0002        |
| Root;k_Bacteria;p_Firmicutes;c_Clostridia;o_Clostridiales;f_Clostridiaceae                        | 0.1222        | 0.0027        | 0.0008        | 0.0019         | 0.0010        |
| <b>Root;k_Bacteria;p_Firmicutes;c_Clostridia;o_Clostridiales;</b> f_Dehalobacteriaceae            | <b>0.0002</b> | <b>0.0029</b> | <b>0.0001</b> | <b>0.0029</b>  | <b>0.0003</b> |
| Root;k_Bacteria;p_Firmicutes;c_Clostridia;o_Clostridiales;f_Eubacteriaceae                        | 0.2856        | 0.0000        | 0.0001        | -0.0001        | 0.0001        |
| <b>Root;k_Bacteria;p_Firmicutes;c_Clostridia;o_Clostridiales;</b> f_Lachnospiraceae               | <b>0.0031</b> | <b>0.2529</b> | <b>0.0599</b> | <b>0.1930</b>  | <b>0.0361</b> |
| Root;k_Bacteria;p_Firmicutes;c_Clostridia;o_Clostridiales;f_Peptococcaceae                        |               |               |               |                |               |
| Root;k_Bacteria;p_Firmicutes;c_Clostridia;o_Clostridiales;f_Peptostreptococcaceae                 | 0.2856        | 0.0000        | 0.0002        | -0.0002        | 0.0002        |
| <b>Root;k_Bacteria;p_Firmicutes;c_Clostridia;o_Clostridiales;</b> f_Ruminococcaceae               | <b>0.0027</b> | <b>0.0569</b> | <b>0.0182</b> | <b>0.0387</b>  | <b>0.0070</b> |
| <b>Root;k_Bacteria;p_Firmicutes;c_Clostridia;o_Coriobacteriales;</b> f__                          | <b>0.0007</b> | <b>0.0112</b> | <b>0.0021</b> | <b>0.0091</b>  | <b>0.0012</b> |
| Root;k_Bacteria;p_Firmicutes;c_Clostridia;o_Coriobacteriales;f_Coriobacteriaceae                  | 0.0642        | 0.0045        | 0.0020        | 0.0025         | 0.0011        |
| <b>Root;k_Bacteria;p_Firmicutes;c_Erysipelotrichi;o_Erysipelotrichales;</b> f_Erysipelotrichaceae | <b>0.0216</b> | <b>0.0370</b> | <b>0.1264</b> | <b>-0.0894</b> | <b>0.0272</b> |
| Root;k_Bacteria;p_Firmicutes;c_Erysipelotrichi;o_Erysipelotrichales;f_[Coprobacillaceae]          | 0.0780        | 0.0001        | 0.0019        | -0.0018        | 0.0008        |
| Root;k_Bacteria;p_Planctomycetes;c_Planctomycetia;o_Gemmatales;f_Gemmataceae                      |               |               |               |                |               |
| Root;k_Bacteria;p_Planctomycetes;c_Planctomycetia;o_Pirellulales;f_Pirellulaceae                  |               |               |               |                |               |
| Root;k_Bacteria;p_Planctomycetes;c_Planctomycetia;o_Planctomycetales;f_Planctomycetaceae          |               |               |               |                |               |
| Root;k_Bacteria;p_Proteobacteria;c_Alphaproteobacteria;o_;f__                                     |               |               |               |                |               |
| Root;k_Bacteria;p_Proteobacteria;c_Alphaproteobacteria;o_RF32;f__                                 | 0.8630        | 0.0001        | 0.0001        | 0.0000         | 0.0001        |
| Root;k_Bacteria;p_Proteobacteria;c_Alphaproteobacteria;o_Rhizobiales;f_Brucellaceae               |               |               |               |                |               |
| Root;k_Bacteria;p_Proteobacteria;c_Alphaproteobacteria;o_Rhizobiales;f_Hyphomicrobiaceae          |               |               |               |                |               |
| Root;k_Bacteria;p_Proteobacteria;c_Alphaproteobacteria;o_Rhizobiales;f_Methylobacteriaceae        |               |               |               |                |               |
| Root;k_Bacteria;p_Proteobacteria;c_Alphaproteobacteria;o_Rhizobiales;f_Rhizobiaceae               |               |               |               |                |               |
| Root;k_Bacteria;p_Proteobacteria;c_Alphaproteobacteria;o_Rhodobacterales;f_Rhodobacteraceae       |               |               |               |                |               |
| Root;k_Bacteria;p_Proteobacteria;c_Alphaproteobacteria;o_Rickettsiales;f_mitochondria             |               |               |               |                |               |
| Root;k_Bacteria;p_Proteobacteria;c_Alphaproteobacteria;o_Sphingomonadales;f_Sphingomonadaceae     |               |               |               |                |               |
| <b>Root;k_Bacteria;p_Proteobacteria;c_Betaproteobacteria;o_Burkholderiales;</b> f_Alcaligenaceae  | <b>0.0003</b> | <b>0.0092</b> | <b>0.0577</b> | <b>-0.0485</b> | <b>0.0054</b> |
| Root;k_Bacteria;p_Proteobacteria;c_Betaproteobacteria;o_Burkholderiales;f_Burkholderiaceae        |               |               |               |                |               |
| Root;k_Bacteria;p_Proteobacteria;c_Betaproteobacteria;o_Burkholderiales;f_Comamonadaceae          |               |               |               |                |               |
| Root;k_Bacteria;p_Proteobacteria;c_Betaproteobacteria;o_Burkholderiales;f_Oxalobacteraceae        |               |               |               |                |               |
| Root;k_Bacteria;p_Proteobacteria;c_Betaproteobacteria;o_Methylophilales;f_Methylophilaceae        |               |               |               |                |               |
| Root;k_Bacteria;p_Proteobacteria;c_Betaproteobacteria;o_Rhodocyclales;f_Rhodocyclaceae            |               |               |               |                |               |
| Root;k_Bacteria;p_Proteobacteria;c_Deltaproteobacteria;o_Desulfovibrionales;f_Desulfovibrionaceae | 0.0685        | 0.0482        | 0.0101        | 0.0381         | 0.0165        |
| Root;k_Bacteria;p_Proteobacteria;c_Deltaproteobacteria;o_Myxococcales;f__                         |               |               |               |                |               |
| Root;k_Bacteria;p_Proteobacteria;c_Deltaproteobacteria;o_Myxococcales;f_Nannocystaceae            |               |               |               |                |               |
| Root;k_Bacteria;p_Proteobacteria;c_Deltaproteobacteria;o_Spirobacillales;f__                      |               |               |               |                |               |
| Root;k_Bacteria;p_Proteobacteria;c_Epsilonproteobacteria;o_Campylobacterales;f_Helicobacteraceae  | 0.1375        | 0.0204        | 0.0481        | -0.0277        | 0.0157        |
| Root;k_Bacteria;p_Proteobacteria;c_Gammaproteobacteria;o_Aeromonadales;f__                        |               |               |               |                |               |
| Root;k_Bacteria;p_Proteobacteria;c_Gammaproteobacteria;o_Aeromonadales;f_Aeromonadaceae           |               |               |               |                |               |
| Root;k_Bacteria;p_Proteobacteria;c_Gammaproteobacteria;o_Enterobacteriales;f_Enterobacteriaceae   |               |               |               |                |               |
| Root;k_Bacteria;p_Proteobacteria;c_Gammaproteobacteria;o_Pasteurellales;f_Pasteurellaceae         |               |               |               |                |               |
| Root;k_Bacteria;p_Proteobacteria;c_Gammaproteobacteria;o_Pseudomonadales;f_Moraxellaceae          |               |               |               |                |               |
| Root;k_Bacteria;p_Proteobacteria;c_Gammaproteobacteria;o_Pseudomonadales;f_Pseudomonadaceae       |               |               |               |                |               |
| Root;k_Bacteria;p_Proteobacteria;c_Gammaproteobacteria;o_Xanthomonadales;f_Xanthomonadaceae       |               |               |               |                |               |

|                                                                                                      |               |               |               |               |               |
|------------------------------------------------------------------------------------------------------|---------------|---------------|---------------|---------------|---------------|
| <b>Root;k__Bacteria;p__TM7;c__TM7-3;o__CW040;f__F16</b>                                              | <b>0.0043</b> | <b>0.0003</b> | <b>0.0000</b> | <b>0.0003</b> | <b>0.0001</b> |
| Root;k__Bacteria;p__Tenericutes;c__Mollicutes;o__Acholeplasmatales;f__Acholeplasmataceae             |               |               |               |               |               |
| Root;k__Bacteria;p__Tenericutes;c__Mollicutes;o__Anaeroplasmatales;f__Anaeroplasmataceae             |               |               |               |               |               |
| Root;k__Bacteria;p__Tenericutes;c__Mollicutes;o__Mycoplasmatales;f__Mycoplasmataceae                 | 0.0505        | 0.0070        | 0.0008        | 0.0061        | 0.0024        |
| Root;k__Bacteria;p__Tenericutes;c__Mollicutes;o__RF39;f__                                            | 0.4904        | 0.0003        | 0.0005        | -0.0002       | 0.0003        |
| Root;k__Bacteria;p__Verrucomicrobia;c__Verrucomicrobiae;o__Verrucomicrobiales;f__Verrucomicrobiaceae | 0.2445        | 0.0000        | 0.0010        | -0.0010       | 0.0008        |

## TLR5<sup>-/-</sup> water versus TLR5<sup>-/-</sup> P80 - Mucosa Associated Bacteria

| Phyla level                       | P value | Mean water-treated | Mean P80-treated | Difference | SE of difference |
|-----------------------------------|---------|--------------------|------------------|------------|------------------|
| Root;k_Bacteria;p_Actinobacteria  | 0.3554  | 0.0004             | 0.0002           | 0.0002     | 0.0002           |
| Root;k_Bacteria;p_Bacteroidetes   | 0.6707  | 0.2255             | 0.2699           | -0.0445    | 0.0995           |
| Root;k_Bacteria;p_Cyanobacteria   | 0.2057  | 0.0025             | 0.0005           | 0.0020     | 0.0014           |
| Root;k_Bacteria;p_Deferribacteres | 0.9662  | 0.0023             | 0.0023           | 0.0001     | 0.0018           |
| Root;k_Bacteria;p_Firmicutes      | 0.6680  | 0.3385             | 0.2883           | 0.0502     | 0.1114           |
| Root;k_Bacteria;p_Planctomycetes  |         |                    |                  |            |                  |
| Root;k_Bacteria;p_Proteobacteria  | 0.9149  | 0.4118             | 0.4312           | -0.0194    | 0.1741           |
| Root;k_Bacteria;p_TM7             | 0.3559  | 0.0001             | 0.0000           | 0.0001     | 0.0001           |
| Root;k_Bacteria;p_Tenericutes     | 0.7427  | 0.0103             | 0.0074           | 0.0030     | 0.0086           |
| Root;k_Bacteria;p_Verrucomicrobia | 0.2651  | 0.0086             | 0.0003           | 0.0084     | 0.0068           |

| Class level                                              | P value | Mean water-treated | Mean P80-treated | Difference | SE of difference |
|----------------------------------------------------------|---------|--------------------|------------------|------------|------------------|
| Root;k_Bacteria;p_Actinobacteria;c_Actinobacteria        | 0.3554  | 0.0004             | 0.0002           | 0.0002     | 0.0002           |
| Root;k_Bacteria;p_Actinobacteria;c_Thermoleophilia       |         |                    |                  |            |                  |
| Root;k_Bacteria;p_Bacteroidetes;c_Bacteroidia            | 0.6704  | 0.2254             | 0.2699           | -0.0445    | 0.0995           |
| Root;k_Bacteria;p_Bacteroidetes;c_Flavobacteriia         | 0.3559  | 0.0001             | 0.0000           | 0.0001     | 0.0001           |
| Root;k_Bacteria;p_Bacteroidetes;c_Sphingobacteriia       |         |                    |                  |            |                  |
| Root;k_Bacteria;p_Cyanobacteria;c_4C0d-2                 | 0.2057  | 0.0025             | 0.0005           | 0.0020     | 0.0014           |
| Root;k_Bacteria;p_Cyanobacteria;c_Chloroplast            |         |                    |                  |            |                  |
| Root;k_Bacteria;p_Deferribacteres;c_Deferribacteres      | 0.9662  | 0.0023             | 0.0023           | 0.0001     | 0.0018           |
| Root;k_Bacteria;p_Firmicutes;c_Bacilli                   | 0.1651  | 0.0173             | 0.0015           | 0.0158     | 0.0100           |
| Root;k_Bacteria;p_Firmicutes;c_Clostridia                | 0.7779  | 0.3132             | 0.2794           | 0.0338     | 0.1147           |
| Root;k_Bacteria;p_Firmicutes;c_Erysipelotrichi           | 0.8908  | 0.0080             | 0.0075           | 0.0006     | 0.0039           |
| Root;k_Bacteria;p_Planctomycetes;c_Planctomycetia        |         |                    |                  |            |                  |
| Root;k_Bacteria;p_Proteobacteria;c_Alphaproteobacteria   | 0.3559  | 0.0000             | 0.0000           | 0.0000     | 0.0000           |
| Root;k_Bacteria;p_Proteobacteria;c_Betaproteobacteria    | 0.9184  | 0.0257             | 0.0271           | -0.0014    | 0.0130           |
| Root;k_Bacteria;p_Proteobacteria;c_Deltaproteobacteria   | 0.4093  | 0.0449             | 0.0329           | 0.0120     | 0.0136           |
| Root;k_Bacteria;p_Proteobacteria;c_Epsilonproteobacteria | 0.9940  | 0.3404             | 0.3391           | 0.0013     | 0.1658           |
| Root;k_Bacteria;p_Proteobacteria;c_Gammaproteobacteria   | 0.3656  | 0.0008             | 0.0321           | -0.0313    | 0.0320           |
| Root;k_Bacteria;p_TM7;c_TM7-3                            | 0.3559  | 0.0001             | 0.0000           | 0.0001     | 0.0001           |
| Root;k_Bacteria;p_Tenericutes;c_Mollicutes               | 0.7427  | 0.0103             | 0.0074           | 0.0030     | 0.0086           |
| Root;k_Bacteria;p_Verrucomicrobia;c_Verrucomicrobiae     | 0.2651  | 0.0086             | 0.0003           | 0.0084     | 0.0068           |

| Order level                                                               | P value | Mean water-treated | Mean P80-treated | Difference | SE of difference |
|---------------------------------------------------------------------------|---------|--------------------|------------------|------------|------------------|
| Root;k_Bacteria;p_Actinobacteria;c_Actinobacteria;o_Actinomycetales       |         |                    |                  |            |                  |
| Root;k_Bacteria;p_Actinobacteria;c_Actinobacteria;o_Bifidobacteriales     | 0.3554  | 0.0004             | 0.0002           | 0.0002     | 0.0002           |
| Root;k_Bacteria;p_Actinobacteria;c_Thermoleophilia;o_Solirubrobacteriales |         |                    |                  |            |                  |
| Root;k_Bacteria;p_Bacteroidetes;c_Bacteroidia;o_Bacteroidales             | 0.6704  | 0.2254             | 0.2699           | -0.0445    | 0.0995           |
| Root;k_Bacteria;p_Bacteroidetes;c_Flavobacteriia;o_Flavobacteriales       | 0.3559  | 0.0001             | 0.0000           | 0.0001     | 0.0001           |
| Root;k_Bacteria;p_Bacteroidetes;c_Sphingobacteriia;o_Sphingobacteriales   |         |                    |                  |            |                  |



|                                                                              |               |               |               |               |               |
|------------------------------------------------------------------------------|---------------|---------------|---------------|---------------|---------------|
| Root;k_Bacteria;p_Cyanobacteria;c_4C0d-2;o_Y52                               | 0.2057        | 0.0025        | 0.0005        | 0.0020        | 0.0014        |
| Root;k_Bacteria;p_Cyanobacteria;c_Chloroplast;o_Streptophyta                 |               |               |               |               |               |
| Root;k_Bacteria;p_Deferribacteres;c_Deferribacteres;o_Deferribacterales      | 0.9662        | 0.0023        | 0.0023        | 0.0001        | 0.0018        |
| Root;k_Bacteria;p_Firmicutes;c_Bacilli;o_                                    |               |               |               |               |               |
| Root;k_Bacteria;p_Firmicutes;c_Bacilli;o_Bacillales                          |               |               |               |               |               |
| Root;k_Bacteria;p_Firmicutes;c_Bacilli;o_Lactobacillales                     | 0.2064        | 0.0157        | 0.0014        | 0.0143        | 0.0101        |
| <b>Root;k_Bacteria;p_Firmicutes;c_Bacilli;o_Turicibacterales</b>             | <b>0.0110</b> | <b>0.0016</b> | <b>0.0001</b> | <b>0.0015</b> | <b>0.0004</b> |
| Root;k_Bacteria;p_Firmicutes;c_Clostridia;o_                                 | 0.6736        | 0.0127        | 0.0107        | 0.0020        | 0.0045        |
| Root;k_Bacteria;p_Firmicutes;c_Clostridia;o_Clostridiales                    | 0.7821        | 0.2960        | 0.2642        | 0.0318        | 0.1099        |
| Root;k_Bacteria;p_Firmicutes;c_Clostridia;o_Coriobacteriales                 | 0.9866        | 0.0045        | 0.0045        | 0.0001        | 0.0029        |
| Root;k_Bacteria;p_Firmicutes;c_Erysipelotrichi;o_Erysipelotrichales          | 0.8908        | 0.0080        | 0.0075        | 0.0006        | 0.0039        |
| Root;k_Bacteria;p_Planctomycetes;c_Planctomycetia;o_Gemmatales               |               |               |               |               |               |
| Root;k_Bacteria;p_Planctomycetes;c_Planctomycetia;o_Pirellulales             |               |               |               |               |               |
| Root;k_Bacteria;p_Planctomycetes;c_Planctomycetia;o_Planctomycetales         |               |               |               |               |               |
| Root;k_Bacteria;p_Proteobacteria;c_Alphaproteobacteria;o_                    |               |               |               |               |               |
| Root;k_Bacteria;p_Proteobacteria;c_Alphaproteobacteria;o_RF32                |               |               |               |               |               |
| Root;k_Bacteria;p_Proteobacteria;c_Alphaproteobacteria;o_Rhizobiales         |               |               |               |               |               |
| Root;k_Bacteria;p_Proteobacteria;c_Alphaproteobacteria;o_Rhodobacterales     |               |               |               |               |               |
| Root;k_Bacteria;p_Proteobacteria;c_Alphaproteobacteria;o_Rickettsiales       |               |               |               |               |               |
| Root;k_Bacteria;p_Proteobacteria;c_Alphaproteobacteria;o_Sphingomonadales    | 0.3559        | 0.0000        | 0.0000        | 0.0000        | 0.0000        |
| Root;k_Bacteria;p_Proteobacteria;c_Betaproteobacteria;o_Burkholderiales      | 0.9184        | 0.0257        | 0.0271        | -0.0014       | 0.0130        |
| Root;k_Bacteria;p_Proteobacteria;c_Betaproteobacteria;o_Methylophilales      |               |               |               |               |               |
| Root;k_Bacteria;p_Proteobacteria;c_Betaproteobacteria;o_Rhodocyclales        |               |               |               |               |               |
| Root;k_Bacteria;p_Proteobacteria;c_Deltaproteobacteria;o_Desulfovibrionales  | 0.4093        | 0.0449        | 0.0329        | 0.0120        | 0.0136        |
| Root;k_Bacteria;p_Proteobacteria;c_Deltaproteobacteria;o_Myxococcales        |               |               |               |               |               |
| Root;k_Bacteria;p_Proteobacteria;c_Deltaproteobacteria;o_Spirobacillales     |               |               |               |               |               |
| Root;k_Bacteria;p_Proteobacteria;c_Epsilonproteobacteria;o_Campylobacterales | 0.9940        | 0.3404        | 0.3391        | 0.0013        | 0.1658        |
| Root;k_Bacteria;p_Proteobacteria;c_Gammaproteobacteria;o_Aeromonadales       |               |               |               |               |               |
| Root;k_Bacteria;p_Proteobacteria;c_Gammaproteobacteria;o_Enterobacteriales   | 0.3614        | 0.0005        | 0.0320        | -0.0315       | 0.0319        |
| Root;k_Bacteria;p_Proteobacteria;c_Gammaproteobacteria;o_Pasteurellales      |               |               |               |               |               |
| Root;k_Bacteria;p_Proteobacteria;c_Gammaproteobacteria;o_Pseudomonadales     | 0.1710        | 0.0002        | 0.0000        | 0.0002        | 0.0001        |
| Root;k_Bacteria;p_Proteobacteria;c_Gammaproteobacteria;o_Xanthomonadales     | 0.8001        | 0.0001        | 0.0001        | 0.0000        | 0.0001        |
| Root;k_Bacteria;p_TM7;c_TM7-3;o_CW040                                        | 0.3559        | 0.0001        | 0.0000        | 0.0001        | 0.0001        |
| Root;k_Bacteria;p_Tenericutes;c_Mollicutes;o_Acholeplasmatales               |               |               |               |               |               |
| Root;k_Bacteria;p_Tenericutes;c_Mollicutes;o_Anaeroplasmatales               |               |               |               |               |               |
| Root;k_Bacteria;p_Tenericutes;c_Mollicutes;o_Mycoplasmatales                 | 0.7562        | 0.0089        | 0.0063        | 0.0026        | 0.0081        |
| Root;k_Bacteria;p_Tenericutes;c_Mollicutes;o_RF39                            | 0.7225        | 0.0014        | 0.0011        | 0.0003        | 0.0009        |
| Root;k_Bacteria;p_Verrucomicrobia;c_Verrucomicrobiae;o_Verrucomicrobiales    | 0.2651        | 0.0086        | 0.0003        | 0.0084        | 0.0068        |

| Family level                                                                            | P value | Mean water-treated | Mean P80-treated | Difference | SE of difference |
|-----------------------------------------------------------------------------------------|---------|--------------------|------------------|------------|------------------|
| Root;k_Bacteria;p_Actinobacteria;c_Actinobacteria;o_Actinomycetales;f_                  |         |                    |                  |            |                  |
| Root;k_Bacteria;p_Actinobacteria;c_Actinobacteria;o_Actinomycetales;f_ACK-M1            |         |                    |                  |            |                  |
| Root;k_Bacteria;p_Actinobacteria;c_Actinobacteria;o_Actinomycetales;f_Brevibacteriaceae |         |                    |                  |            |                  |

|                                                                                                 |               |               |               |               |               |
|-------------------------------------------------------------------------------------------------|---------------|---------------|---------------|---------------|---------------|
| Root;k_Bacteria;p_Actinobacteria;c_Actinobacteria;o_Actinomycetales;f_Corynebacteriaceae        |               |               |               |               |               |
| Root;k_Bacteria;p_Actinobacteria;c_Actinobacteria;o_Actinomycetales;f_Dermabacteraceae          |               |               |               |               |               |
| Root;k_Bacteria;p_Actinobacteria;c_Actinobacteria;o_Actinomycetales;f_Frankiaceae               |               |               |               |               |               |
| Root;k_Bacteria;p_Actinobacteria;c_Actinobacteria;o_Actinomycetales;f_Kineosporiaceae           |               |               |               |               |               |
| Root;k_Bacteria;p_Actinobacteria;c_Actinobacteria;o_Actinomycetales;f_Microbacteriaceae         |               |               |               |               |               |
| Root;k_Bacteria;p_Actinobacteria;c_Actinobacteria;o_Actinomycetales;f_Micrococcaceae            |               |               |               |               |               |
| Root;k_Bacteria;p_Actinobacteria;c_Actinobacteria;o_Actinomycetales;f_Nocardiaceae              |               |               |               |               |               |
| Root;k_Bacteria;p_Actinobacteria;c_Actinobacteria;o_Actinomycetales;f_Promicromonosporaceae     |               |               |               |               |               |
| Root;k_Bacteria;p_Actinobacteria;c_Actinobacteria;o_Actinomycetales;f_Streptomycetaceae         |               |               |               |               |               |
| Root;k_Bacteria;p_Actinobacteria;c_Actinobacteria;o_Bifidobacteriales;f_                        |               |               |               |               |               |
| Root;k_Bacteria;p_Actinobacteria;c_Actinobacteria;o_Bifidobacteriales;f_Bifidobacteriaceae      | 0.3554        | 0.0004        | 0.0002        | 0.0002        | 0.0002        |
| Root;k_Bacteria;p_Actinobacteria;c_Thermoleophilia;o_Solirubrobacterales;f_Solirubrobacteraceae |               |               |               |               |               |
| Root;k_Bacteria;p_Bacteroidetes;c_Bacteroidia;o_Bacteroidales;f_                                | 0.2477        | 0.0108        | 0.0009        | 0.0099        | 0.0077        |
| Root;k_Bacteria;p_Bacteroidetes;c_Bacteroidia;o_Bacteroidales;f_Bacteroidaceae                  | 0.5517        | 0.0619        | 0.0360        | 0.0259        | 0.0411        |
| Root;k_Bacteria;p_Bacteroidetes;c_Bacteroidia;o_Bacteroidales;f_Porphyrimonadaceae              | 0.4568        | 0.0093        | 0.0060        | 0.0034        | 0.0042        |
| Root;k_Bacteria;p_Bacteroidetes;c_Bacteroidia;o_Bacteroidales;f_Prevotellaceae                  | 0.3811        | 0.0087        | 0.0042        | 0.0045        | 0.0047        |
| Root;k_Bacteria;p_Bacteroidetes;c_Bacteroidia;o_Bacteroidales;f_Rikenellaceae                   | 0.1929        | 0.0066        | 0.0018        | 0.0048        | 0.0033        |
| Root;k_Bacteria;p_Bacteroidetes;c_Bacteroidia;o_Bacteroidales;f_S24-7                           | 0.2591        | 0.1228        | 0.2166        | -0.0938       | 0.0752        |
| Root;k_Bacteria;p_Bacteroidetes;c_Bacteroidia;o_Bacteroidales;f_[Odoribacteraceae]              | 0.6495        | 0.0053        | 0.0045        | 0.0008        | 0.0016        |
| Root;k_Bacteria;p_Bacteroidetes;c_Flavobacteriia;o_Flavobacteriales;f_Cryomorphaceae            | 0.3559        | 0.0001        | 0.0000        | 0.0001        | 0.0001        |
| Root;k_Bacteria;p_Bacteroidetes;c_Flavobacteriia;o_Flavobacteriales;f_Flavobacteriaceae         |               |               |               |               |               |
| Root;k_Bacteria;p_Bacteroidetes;c_Sphingobacteriia;o_Sphingobacteriales;f_                      |               |               |               |               |               |
| Root;k_Bacteria;p_Bacteroidetes;c_Sphingobacteriia;o_Sphingobacteriales;f_Chitinophagaceae      |               |               |               |               |               |
| Root;k_Bacteria;p_Bacteroidetes;c_Sphingobacteriia;o_Sphingobacteriales;f_Flexibacteraceae      |               |               |               |               |               |
| Root;k_Bacteria;p_Cyanobacteria;c_4C0d-2;o_YS2;f_                                               | 0.2057        | 0.0025        | 0.0005        | 0.0020        | 0.0014        |
| Root;k_Bacteria;p_Cyanobacteria;c_Chloroplast;o_Streptophyta;f_                                 |               |               |               |               |               |
| Root;k_Bacteria;p_Deferribacteres;c_Deferribacteres;o_Deferribacterales;f_Deferribacteraceae    | 0.9662        | 0.0023        | 0.0023        | 0.0001        | 0.0018        |
| Root;k_Bacteria;p_Firmicutes;c_Bacilli;o_;                                                      |               |               |               |               |               |
| Root;k_Bacteria;p_Firmicutes;c_Bacilli;o_Bacillales;f_                                          |               |               |               |               |               |
| Root;k_Bacteria;p_Firmicutes;c_Bacilli;o_Bacillales;f_Alicyclobacillaceae                       |               |               |               |               |               |
| Root;k_Bacteria;p_Firmicutes;c_Bacilli;o_Bacillales;f_Bacillaceae                               |               |               |               |               |               |
| Root;k_Bacteria;p_Firmicutes;c_Bacilli;o_Bacillales;f_Paenibacillaceae                          |               |               |               |               |               |
| Root;k_Bacteria;p_Firmicutes;c_Bacilli;o_Bacillales;f_Planococcaceae                            |               |               |               |               |               |
| Root;k_Bacteria;p_Firmicutes;c_Bacilli;o_Bacillales;f_Staphylococcaceae                         |               |               |               |               |               |
| Root;k_Bacteria;p_Firmicutes;c_Bacilli;o_Bacillales;f_Thermoactinomycetaceae                    |               |               |               |               |               |
| Root;k_Bacteria;p_Firmicutes;c_Bacilli;o_Lactobacillales;f_                                     |               |               |               |               |               |
| Root;k_Bacteria;p_Firmicutes;c_Bacilli;o_Lactobacillales;f_Aerococcaceae                        | 0.8312        | 0.0001        | 0.0000        | 0.0000        | 0.0001        |
| Root;k_Bacteria;p_Firmicutes;c_Bacilli;o_Lactobacillales;f_Carnobacteriaceae                    |               |               |               |               |               |
| Root;k_Bacteria;p_Firmicutes;c_Bacilli;o_Lactobacillales;f_Enterococcaceae                      |               |               |               |               |               |
| Root;k_Bacteria;p_Firmicutes;c_Bacilli;o_Lactobacillales;f_Lactobacillaceae                     | 0.2074        | 0.0156        | 0.0013        | 0.0142        | 0.0101        |
| Root;k_Bacteria;p_Firmicutes;c_Bacilli;o_Lactobacillales;f_Leuconostocaceae                     |               |               |               |               |               |
| Root;k_Bacteria;p_Firmicutes;c_Bacilli;o_Lactobacillales;f_Streptococcaceae                     | 0.3559        | 0.0001        | 0.0000        | 0.0001        | 0.0001        |
| <b>Root;k_Bacteria;p_Firmicutes;c_Bacilli;o_Turicibacterales;f_Turicibacteraceae</b>            | <b>0.0110</b> | <b>0.0016</b> | <b>0.0001</b> | <b>0.0015</b> | <b>0.0004</b> |

|                                                                                                   |        |        |        |         |        |
|---------------------------------------------------------------------------------------------------|--------|--------|--------|---------|--------|
| Root;k_Bacteria;p_Firmicutes;c_Clostridia;o_ ;f_                                                  | 0.6736 | 0.0127 | 0.0107 | 0.0020  | 0.0045 |
| Root;k_Bacteria;p_Firmicutes;c_Clostridia;o_Clostridiales;f_                                      | 0.4657 | 0.0033 | 0.0012 | 0.0021  | 0.0027 |
| Root;k_Bacteria;p_Firmicutes;c_Clostridia;o_Clostridiales;f_Clostridiaceae                        | 0.3670 | 0.0023 | 0.0033 | -0.0011 | 0.0011 |
| Root;k_Bacteria;p_Firmicutes;c_Clostridia;o_Clostridiales;f_Dehalobacteriaceae                    | 0.0735 | 0.0007 | 0.0017 | -0.0010 | 0.0005 |
| Root;k_Bacteria;p_Firmicutes;c_Clostridia;o_Clostridiales;f_Eubacteriaceae                        |        |        |        |         |        |
| Root;k_Bacteria;p_Firmicutes;c_Clostridia;o_Clostridiales;f_Lachnospiraceae                       | 0.6958 | 0.1980 | 0.1681 | 0.0298  | 0.0727 |
| Root;k_Bacteria;p_Firmicutes;c_Clostridia;o_Clostridiales;f_Peptococcaceae                        |        |        |        |         |        |
| Root;k_Bacteria;p_Firmicutes;c_Clostridia;o_Clostridiales;f_Peptostreptococcaceae                 |        |        |        |         |        |
| Root;k_Bacteria;p_Firmicutes;c_Clostridia;o_Clostridiales;f_Ruminococcaceae                       | 0.9595 | 0.0917 | 0.0898 | 0.0019  | 0.0365 |
| Root;k_Bacteria;p_Firmicutes;c_Clostridia;o_Coriobacteriales;f_                                   | 0.9543 | 0.0044 | 0.0042 | 0.0002  | 0.0028 |
| Root;k_Bacteria;p_Firmicutes;c_Clostridia;o_Coriobacteriales;f_Coriobacteriaceae                  | 0.4055 | 0.0002 | 0.0003 | -0.0001 | 0.0001 |
| Root;k_Bacteria;p_Firmicutes;c_Erysipelotrichi;o_Erysipelotrichales;f_Erysipelotrichaceae         | 0.7028 | 0.0056 | 0.0065 | -0.0009 | 0.0024 |
| Root;k_Bacteria;p_Firmicutes;c_Erysipelotrichi;o_Erysipelotrichales;f_[Coprobacillaceae]          | 0.5113 | 0.0025 | 0.0009 | 0.0015  | 0.0022 |
| Root;k_Bacteria;p_Planctomycetes;c_Planctomycetia;o_Gemmatales;f_Gemmataceae                      |        |        |        |         |        |
| Root;k_Bacteria;p_Planctomycetes;c_Planctomycetia;o_Pirellulales;f_Pirellulaceae                  |        |        |        |         |        |
| Root;k_Bacteria;p_Planctomycetes;c_Planctomycetia;o_Planctomycetales;f_Planctomycetaceae          |        |        |        |         |        |
| Root;k_Bacteria;p_Proteobacteria;c_Alphaproteobacteria;o_ ;f_                                     |        |        |        |         |        |
| Root;k_Bacteria;p_Proteobacteria;c_Alphaproteobacteria;o_RF32;f_                                  |        |        |        |         |        |
| Root;k_Bacteria;p_Proteobacteria;c_Alphaproteobacteria;o_Rhizobiales;f_Brucellaceae               |        |        |        |         |        |
| Root;k_Bacteria;p_Proteobacteria;c_Alphaproteobacteria;o_Rhizobiales;f_Hyphomicrobiaceae          |        |        |        |         |        |
| Root;k_Bacteria;p_Proteobacteria;c_Alphaproteobacteria;o_Rhizobiales;f_Methylobacteriaceae        |        |        |        |         |        |
| Root;k_Bacteria;p_Proteobacteria;c_Alphaproteobacteria;o_Rhizobiales;f_Rhizobiaceae               |        |        |        |         |        |
| Root;k_Bacteria;p_Proteobacteria;c_Alphaproteobacteria;o_Rhodobacterales;f_Rhodobacteraceae       |        |        |        |         |        |
| Root;k_Bacteria;p_Proteobacteria;c_Alphaproteobacteria;o_Rickettsiales;f_mitochondria             |        |        |        |         |        |
| Root;k_Bacteria;p_Proteobacteria;c_Alphaproteobacteria;o_Sphingomonadales;f_Sphingomonadaceae     | 0.3559 | 0.0000 | 0.0000 | 0.0000  | 0.0000 |
| Root;k_Bacteria;p_Proteobacteria;c_Betaproteobacteria;o_Burkholderiales;f_Alcaligenaceae          | 0.9184 | 0.0257 | 0.0271 | -0.0014 | 0.0130 |
| Root;k_Bacteria;p_Proteobacteria;c_Betaproteobacteria;o_Burkholderiales;f_Burkholderiaceae        |        |        |        |         |        |
| Root;k_Bacteria;p_Proteobacteria;c_Betaproteobacteria;o_Burkholderiales;f_Comamonadaceae          |        |        |        |         |        |
| Root;k_Bacteria;p_Proteobacteria;c_Betaproteobacteria;o_Burkholderiales;f_Oxalobacteraceae        |        |        |        |         |        |
| Root;k_Bacteria;p_Proteobacteria;c_Betaproteobacteria;o_Methylophilales;f_Methylophilaceae        |        |        |        |         |        |
| Root;k_Bacteria;p_Proteobacteria;c_Betaproteobacteria;o_Rhodocyclales;f_Rhodocyclaceae            |        |        |        |         |        |
| Root;k_Bacteria;p_Proteobacteria;c_Deltaproteobacteria;o_Desulfovibrionales;f_Desulfovibrionaceae | 0.4093 | 0.0449 | 0.0329 | 0.0120  | 0.0136 |
| Root;k_Bacteria;p_Proteobacteria;c_Deltaproteobacteria;o_Myxococcales;f_                          |        |        |        |         |        |
| Root;k_Bacteria;p_Proteobacteria;c_Deltaproteobacteria;o_Myxococcales;f_Nannocystaceae            |        |        |        |         |        |
| Root;k_Bacteria;p_Proteobacteria;c_Deltaproteobacteria;o_Spirobacillales;f_                       |        |        |        |         |        |
| Root;k_Bacteria;p_Proteobacteria;c_Epsilonproteobacteria;o_Campylobacterales;f_Helicobacteraceae  | 0.9940 | 0.3404 | 0.3391 | 0.0013  | 0.1658 |
| Root;k_Bacteria;p_Proteobacteria;c_Gammaproteobacteria;o_Aeromonadales;f_                         |        |        |        |         |        |
| Root;k_Bacteria;p_Proteobacteria;c_Gammaproteobacteria;o_Aeromonadales;f_Aeromonadaceae           |        |        |        |         |        |
| Root;k_Bacteria;p_Proteobacteria;c_Gammaproteobacteria;o_Enterobacteriales;f_Enterobacteriaceae   | 0.3614 | 0.0005 | 0.0320 | -0.0315 | 0.0319 |
| Root;k_Bacteria;p_Proteobacteria;c_Gammaproteobacteria;o_Pasteurellales;f_Pasteurellaceae         |        |        |        |         |        |
| Root;k_Bacteria;p_Proteobacteria;c_Gammaproteobacteria;o_Pseudomonadales;f_Moraxellaceae          | 0.1710 | 0.0002 | 0.0000 | 0.0002  | 0.0001 |
| Root;k_Bacteria;p_Proteobacteria;c_Gammaproteobacteria;o_Pseudomonadales;f_Pseudomonadaceae       |        |        |        |         |        |
| Root;k_Bacteria;p_Proteobacteria;c_Gammaproteobacteria;o_Xanthomonadales;f_Xanthomonadaceae       | 0.8001 | 0.0001 | 0.0001 | 0.0000  | 0.0001 |

Chassaing et al, Supplemental Table 1.

|                                                                                                      |        |        |        |        |        |
|------------------------------------------------------------------------------------------------------|--------|--------|--------|--------|--------|
| Root;k__Bacteria;p__TM7;c__TM7-3;o__CW040;f__F16                                                     | 0.3559 | 0.0001 | 0.0000 | 0.0001 | 0.0001 |
| Root;k__Bacteria;p__Tenericutes;c__Mollicutes;o__Acholeplasmatales;f__Acholeplasmataceae             |        |        |        |        |        |
| Root;k__Bacteria;p__Tenericutes;c__Mollicutes;o__Anaeroplasmatales;f__Anaeroplasmataceae             |        |        |        |        |        |
| Root;k__Bacteria;p__Tenericutes;c__Mollicutes;o__Mycoplasmatales;f__Mycoplasmataceae                 | 0.7562 | 0.0089 | 0.0063 | 0.0026 | 0.0081 |
| Root;k__Bacteria;p__Tenericutes;c__Mollicutes;o__RF39;f__                                            | 0.7225 | 0.0014 | 0.0011 | 0.0003 | 0.0009 |
| Root;k__Bacteria;p__Verrucomicrobia;c__Verrucomicrobiae;o__Verrucomicrobiales;f__Verrucomicrobiaceae | 0.2651 | 0.0086 | 0.0003 | 0.0084 | 0.0068 |
