# Supplementary material
Source: PubMed Central journal article supplement (PMC4910713)
Supplement: NIHMS656221-supplement-Table_S2.pdf [file NIHMS656221-supplement-Table_S2.pdf]

### WT water versus WT CMC

| Prok MSA# | Taxonomy                                                                                                                     | P value  | Mean water-treated | Mean CMC-treated | Difference | SE of difference |
|-----------|------------------------------------------------------------------------------------------------------------------------------|----------|--------------------|------------------|------------|------------------|
| 1         | 308076 Root; k Bacteria; p Bacteroidetes; c Bacteroidia; o Bacteroidales; f S24-7; g ; s                                     | < 0.0001 | 0.4787             | 4.6447           | -4.1660    | 0.5180           |
| 2         | 355746 Root; k Bacteria; p Bacteroidetes; c Bacteroidia; o Bacteroidales; f S24-7; g ; s                                     | < 0.0001 | 3.4795             | 0.0701           | 3.4094     | 0.4768           |
| 3         | 263977 Root; k Bacteria; p Firmicutes; c Clostridia; o Clostridiales; f Ruminococcaceae; g Oscillospira; s                   | < 0.0001 | 0.0765             | 0.0077           | 0.0689     | 0.0080           |
| 4         | 214715 Root; k Bacteria; p Bacteroidetes; c Bacteroidia; o Bacteroidales; f S24-7; g ; s                                     | < 0.0001 | 1.2294             | 7.5226           | -6.2932    | 0.6699           |
| 5         | 228329 Root; k Bacteria; p Bacteroidetes; c Bacteroidia; o Bacteroidales; f S24-7; g ; s                                     | < 0.0001 | 3.4245             | 0.0000           | 3.4245     | 0.3908           |
| 6         | 213015 Root; k Bacteria; p Bacteroidetes; c Bacteroidia; o Bacteroidales; f S24-7; g ; s                                     | < 0.0001 | 0.0206             | 0.2645           | -0.2438    | 0.0302           |
| 7         | 187151 Root; k Bacteria; p Firmicutes; c Clostridia; o Clostridiales; f Ruminococcaceae; g Ruminococcus; s                   | 0.0001   | 0.0758             | 0.0156           | 0.0602     | 0.0087           |
| 8         | 334098 Root; k Bacteria; p Firmicutes; c Clostridia; o Clostridiales; f Lachnospiraceae; g ; s                               | 0.0002   | 0.1737             | 0.0123           | 0.1614     | 0.0243           |
| 9         | 1107461 Root; k Bacteria; p Firmicutes; c Clostridia; o Clostridiales; f Lachnospiraceae; g ; s                              | 0.0002   | 0.0000             | 1.8961           | -1.8961    | 0.2994           |
| 10        | 464959 Root; k Bacteria; p Bacteroidetes; c Bacteroidia; o Bacteroidales; f S24-7; g ; s                                     | 0.0003   | 3.6720             | 2.1488           | 1.5232     | 0.2522           |
| 11        | 315430 Root; k Bacteria; p Bacteroidetes; c Bacteroidia; o Bacteroidales; f S24-7; g ; s                                     | 0.0003   | 0.0705             | 0.2028           | -0.1324    | 0.0221           |
| 12        | 423647 Root; k Bacteria; p TM7; c TM7-3; o CW040; f F16; g ; s                                                               | 0.0004   | 0.0279             | 0.0000           | 0.0279     | 0.0048           |
| 13        | 183053 Root; k Bacteria; p Firmicutes; c Clostridia; o Clostridiales; f Lachnospiraceae; g ; s                               | 0.0004   | 0.0841             | 0.0000           | 0.0841     | 0.0146           |
| 14        | 398839 Root; k Bacteria; p Proteobacteria; c Betaproteobacteria; o Burkholderiales; f Alcaligenaceae; g Sutterella; s        | 0.0005   | 0.0171             | 3.1180           | -3.1008    | 0.5544           |
| 15        | 261177 Root; k Bacteria; p Bacteroidetes; c Bacteroidia; o Bacteroidales; f S24-7; g ; s                                     | 0.0005   | 4.8424             | 10.2108          | -5.3684    | 0.9615           |
| 16        | 348875 Root; k Bacteria; p Firmicutes; c Clostridia; o Clostridiales; f Lachnospiraceae; g ; s                               | 0.0005   | 0.0241             | 0.0000           | 0.0241     | 0.0043           |
| 17        | 275964 Root; k Bacteria; p Firmicutes; c Clostridia; o ; f ; g ; s                                                           | 0.0006   | 0.5097             | 0.1036           | 0.4060     | 0.0734           |
| 18        | 176868 Root; k Bacteria; p Firmicutes; c Clostridia; o Clostridiales; f Dehalobacteriaceae; g Dehalobacterium; s             | 0.0006   | 0.1667             | 0.0147           | 0.1520     | 0.0276           |
| 19        | 276509 Root; k Bacteria; p Bacteroidetes; c Bacteroidia; o Bacteroidales; f S24-7; g ; s                                     | 0.0006   | 0.0144             | 0.2753           | -0.2609    | 0.0476           |
| 20        | 174056 Root; k Bacteria; p Bacteroidetes; c Bacteroidia; o Bacteroidales; f S24-7; g ; s                                     | 0.0011   | 0.3347             | 0.1195           | 0.2153     | 0.0430           |
| 21        | 265669 Root; k Bacteria; p Firmicutes; c Clostridia; o Clostridiales; f Ruminococcaceae; g Ruminococcus; s                   | 0.0012   | 0.2054             | 0.0696           | 0.1358     | 0.0278           |
| 22        | 174791 Root; k Bacteria; p Bacteroidetes; c Bacteroidia; o Bacteroidales; f S24-7; g ; s                                     | 0.0014   | 0.0245             | 0.0000           | 0.0245     | 0.0051           |
| 23        | 533785 Root; k Bacteria; p Actinobacteria; c Actinobacteria; o Bifidobacteriales; f Bifidobacteriaceae; g Bifidobacterium; s | 0.0014   | 0.6036             | 0.0735           | 0.5301     | 0.1112           |
| 24        | 179037 Root; k Bacteria; p Firmicutes; c Clostridia; o Clostridiales; f Lachnospiraceae; g ; s                               | 0.0014   | 0.1835             | 0.0149           | 0.1686     | 0.0354           |
| 25        | 192389 Root; k Bacteria; p Firmicutes; c Clostridia; o Clostridiales; f Lachnospiraceae; g ; s                               | 0.0014   | 0.0262             | 0.3481           | -0.3218    | 0.0677           |
| 26        | 312892 Root; k Bacteria; p Firmicutes; c Clostridia; o ; f ; g ; s                                                           | 0.0015   | 0.2030             | 0.0333           | 0.1697     | 0.0361           |
| 27        | 272593 Root; k Bacteria; p Firmicutes; c Clostridia; o Clostridiales; f Lachnospiraceae; g ; s                               | 0.0017   | 0.0118             | 0.3740           | -0.3622    | 0.0785           |
| 28        | 269949 Root; k Bacteria; p Firmicutes; c Clostridia; o Clostridiales; f Lachnospiraceae; g ; s                               | 0.0026   | 0.0869             | 0.0187           | 0.0682     | 0.0158           |
| 29        | 192222 Root; k Bacteria; p Bacteroidetes; c Bacteroidia; o Bacteroidales; f Prevotellaceae; g Prevotella; s                  | 0.0027   | 0.0081             | 0.6973           | -0.6892    | 0.1608           |
| 30        | 105349 Root; k Bacteria; p Firmicutes; c Clostridia; o Clostridiales; f Ruminococcaceae; g ; s                               | 0.0028   | 0.0190             | 0.0652           | -0.0462    | 0.0109           |
| 31        | 135625 Root; k Bacteria; p Firmicutes; c Clostridia; o Clostridiales; f Lachnospiraceae; g ; s                               | 0.0028   | 0.1336             | 0.0074           | 0.1261     | 0.0298           |
| 32        | 216933 Root; k Bacteria; p Firmicutes; c Bacilli; o Turicibacterales; f Turicibacteraceae; g Turicibacter; s                 | 0.0031   | 3.2292             | 0.0310           | 3.1982     | 0.7658           |
| 33        | 335330 Root; k Bacteria; p Firmicutes; c Clostridia; o Clostridiales; f Ruminococcaceae; g Oscillospira; s                   | 0.0034   | 0.0667             | 0.0157           | 0.0510     | 0.0124           |
| 34        | 317031 Root; k Bacteria; p Firmicutes; c Clostridia; o Clostridiales; f Lachnospiraceae; g ; s                               | 0.0039   | 0.1796             | 0.0156           | 0.1640     | 0.0409           |
| 35        | 324954 Root; k Bacteria; p Bacteroidetes; c Bacteroidia; o Bacteroidales; f S24-7; g ; s                                     | 0.0040   | 0.6858             | 0.0000           | 0.6858     | 0.1717           |
| 36        | 264359 Root; k Bacteria; p Firmicutes; c Clostridia; o Coriobacteriales; f ; g ; s                                           | 0.0042   | 0.0155             | 0.0000           | 0.0155     | 0.0039           |
| 37        | 332364 Root; k Bacteria; p Firmicutes; c Bacilli; o Lactobacillales; f Lactobacillaceae; g ; s                               | 0.0042   | 0.0000             | 0.0152           | -0.0152    | 0.0038           |
| 38        | 261664 Root; k Bacteria; p Firmicutes; c Clostridia; o Clostridiales; f Lachnospiraceae; g ; s                               | 0.0044   | 0.0159             | 0.0000           | 0.0159     | 0.0041           |
| 39        | 174770 Root; k Bacteria; p Firmicutes; c Clostridia; o Clostridiales; f Ruminococcaceae; g Ruminococcus; s                   | 0.0044   | 0.0160             | 0.0000           | 0.0160     | 0.0041           |
| 40        | 261735 Root; k Bacteria; p Firmicutes; c Erysipelotrichi; o Erysipelotrichales; f Erysipelotrichaceae; g Allobaculum; s      | 0.0050   | 1.8909             | 0.0159           | 1.8750     | 0.4889           |
| 41        | 268978 Root; k Bacteria; p Firmicutes; c Clostridia; o Clostridiales; f Lachnospiraceae; g ; s                               | 0.0051   | 0.0541             | 0.0000           | 0.0541     | 0.0142           |
| 42        | 269645 Root; k Bacteria; p Firmicutes; c Clostridia; o Clostridiales; f Ruminococcaceae; g Ruminococcus; s                   | 0.0064   | 0.0360             | 0.0000           | 0.0360     | 0.0098           |
| 43        | 273364 Root; k Bacteria; p Firmicutes; c Clostridia; o Clostridiales; f Lachnospiraceae; g ; s                               | 0.0068   | 0.0129             | 0.0648           | -0.0520    | 0.0144           |
| 44        | 277364 Root; k Bacteria; p Bacteroidetes; c Bacteroidia; o Bacteroidales; f S24-7; g ; s                                     | 0.0071   | 0.3480             | 0.7472           | -0.3992    | 0.1111           |
| 45        | 196965 Root; k Bacteria; p Firmicutes; c Clostridia; o Clostridiales; f Lachnospiraceae; g ; s                               | 0.0071   | 0.1462             | 0.0000           | 0.1462     | 0.0408           |
| 46        | 262173 Root; k Bacteria; p Firmicutes; c Clostridia; o Clostridiales; f Lachnospiraceae; g ; s                               | 0.0082   | 0.0403             | 0.0000           | 0.0403     | 0.0115           |
| 47        | 278649 Root; k Bacteria; p Firmicutes; c Clostridia; o Clostridiales; f Ruminococcaceae; g Oscillospira; s                   | 0.0082   | 0.0194             | 0.0000           | 0.0194     | 0.0056           |
| 48        | 259667 Root; k Bacteria; p Firmicutes; c Clostridia; o Coriobacteriales; f ; g ; s                                           | 0.0085   | 0.2994             | 0.0623           | 0.2371     | 0.0683           |
| 49        | 197956 Root; k Bacteria; p Firmicutes; c Clostridia; o Clostridiales; f Lachnospiraceae; g ; s                               | 0.0089   | 0.0756             | 0.0037           | 0.0718     | 0.0209           |
| 50        | 303184 Root; k Bacteria; p Firmicutes; c Clostridia; o Clostridiales; f Lachnospiraceae; g ; s                               | 0.0094   | 0.0240             | 0.0041           | 0.0199     | 0.0059           |
| 51        | 274502 Root; k Bacteria; p Bacteroidetes; c Bacteroidia; o Bacteroidales; f S24-7; g ; s                                     | 0.0098   | 0.0285             | 0.0042           | 0.0243     | 0.0072           |

|     |         |                                                                                                                           |        |        |        |         |        |
|-----|---------|---------------------------------------------------------------------------------------------------------------------------|--------|--------|--------|---------|--------|
| 52  | 511340  | Root; k Bacteria; p Firmicutes; c Bacilli; o Lactobacillales; f Lactobacillaceae; g Lactobacillus; s                      | 0.0113 | 0.1988 | 1.5541 | -1.3553 | 0.4140 |
| 53  | 3092610 | Root; k Bacteria; p Firmicutes; c Clostridia; o Clostridiales; f Lachnospiraceae; g ; s                                   | 0.0113 | 0.0130 | 0.1219 | -0.1088 | 0.0333 |
| 54  | 175646  | Root; k Bacteria; p Bacteroidetes; c Bacteroidia; o Bacteroidales; f S24-7; g ; s                                         | 0.0113 | 0.0347 | 0.0041 | 0.0306  | 0.0093 |
| 55  | 320912  | Root; k Bacteria; p Firmicutes; c Clostridia; o Clostridiales; f Lachnospiraceae; g ; s                                   | 0.0122 | 0.0000 | 0.0861 | -0.0861 | 0.0267 |
| 56  | 176977  | Root; k Bacteria; p Firmicutes; c Clostridia; o Clostridiales; f Lachnospiraceae; g ; s                                   | 0.0123 | 1.3625 | 0.0338 | 1.3287  | 0.4129 |
| 57  | 262148  | Root; k Bacteria; p Bacteroidetes; c Bacteroidia; o Bacteroidales; f S24-7; g ; s                                         | 0.0127 | 0.0734 | 0.2694 | -0.1960 | 0.0613 |
| 58  | 193827  | Root; k Bacteria; p Firmicutes; c Clostridia; o ; f ; g ; s                                                               | 0.0129 | 1.1881 | 0.1741 | 1.0139  | 0.3182 |
| 59  | 373939  | Root; k Bacteria; p Firmicutes; c Clostridia; o Coriobacteriales; f Coriobacteriaceae; g Adlercreutzia; s                 | 0.0137 | 0.1119 | 0.0498 | 0.0621  | 0.0197 |
| 60  | 433173  | Root; k Bacteria; p Firmicutes; c Clostridia; o Clostridiales; f Lachnospiraceae; g ; s                                   | 0.0138 | 0.0313 | 0.0000 | 0.0313  | 0.0100 |
| 61  | 339549  | Root; k Bacteria; p Bacteroidetes; c Bacteroidia; o Bacteroidales; f S24-7; g ; s                                         | 0.0139 | 0.0612 | 0.0000 | 0.0612  | 0.0195 |
| 62  | 181349  | Root; k Bacteria; p Firmicutes; c Clostridia; o Coriobacteriales; f ; g ; s                                               | 0.0142 | 0.0549 | 0.0000 | 0.0549  | 0.0176 |
| 63  | 422931  | Root; k Bacteria; p Firmicutes; c Bacilli; o Lactobacillales; f Lactobacillaceae; g ; s                                   | 0.0144 | 0.0153 | 0.4406 | -0.4252 | 0.1366 |
| 64  | 183606  | Root; k Bacteria; p Firmicutes; c Clostridia; o Clostridiales; f Lachnospiraceae; g ; s                                   | 0.0144 | 0.0988 | 0.0000 | 0.0988  | 0.0317 |
| 65  | 271846  | Root; k Bacteria; p Bacteroidetes; c Bacteroidia; o Bacteroidales; f S24-7; g ; s                                         | 0.0145 | 0.0075 | 0.0266 | -0.0191 | 0.0061 |
| 66  | 3319464 | Root; k Bacteria; p Proteobacteria; c Epsilonproteobacteria; o Campylobacteriales; f Helicobacteraceae; g Helicobacter; s | 0.0147 | 0.3422 | 0.1125 | 0.2298  | 0.0742 |
| 67  | 184122  | Root; k Bacteria; p Firmicutes; c Clostridia; o Clostridiales; f Lachnospiraceae; g ; s                                   | 0.0151 | 0.0467 | 0.3409 | -0.2942 | 0.0954 |
| 68  | 197099  | Root; k Bacteria; p Firmicutes; c Clostridia; o Clostridiales; f Ruminococcaceae; g Ruminococcus; s                       | 0.0153 | 0.0251 | 0.0000 | 0.0251  | 0.0082 |
| 69  | 129715  | Root; k Bacteria; p Proteobacteria; c Betaproteobacteria; o Burkholderiales; f Oxalobacteraceae; g Cupriavidus; s         | 0.0153 | 0.0000 | 0.0229 | -0.0229 | 0.0075 |
| 70  | 269125  | Root; k Bacteria; p Firmicutes; c Bacilli; o Lactobacillales; f Lactobacillaceae; g ; s                                   | 0.0157 | 0.0636 | 2.0594 | -1.9958 | 0.6532 |
| 71  | 261350  | Root; k Bacteria; p Bacteroidetes; c Bacteroidia; o Bacteroidales; f S24-7; g ; s                                         | 0.0160 | 0.0452 | 0.0000 | 0.0452  | 0.0149 |
| 72  | 244692  | Root; k Bacteria; p Firmicutes; c Clostridia; o Clostridiales; f Ruminococcaceae; g Ruminococcus; s                       | 0.0162 | 0.0768 | 0.0078 | 0.0690  | 0.0228 |
| 73  | 299261  | Root; k Bacteria; p Firmicutes; c Clostridia; o Clostridiales; f Lachnospiraceae; g ; s                                   | 0.0169 | 0.0000 | 0.0913 | -0.0913 | 0.0304 |
| 74  | 179681  | Root; k Bacteria; p Bacteroidetes; c Bacteroidia; o Bacteroidales; f S24-7; g ; s                                         | 0.0175 | 0.6526 | 0.4405 | 0.2121  | 0.0711 |
| 75  | 336193  | Root; k Bacteria; p Proteobacteria; c Betaproteobacteria; o Burkholderiales; f Alcaligenaceae; g Sutterella; s            | 0.0185 | 0.8382 | 0.2678 | 0.5704  | 0.1936 |
| 76  | 228046  | Root; k Bacteria; p Firmicutes; c Clostridia; o Clostridiales; f Lachnospiraceae; g ; s                                   | 0.0188 | 0.0000 | 0.0514 | -0.0514 | 0.0175 |
| 77  | 187294  | Root; k Bacteria; p Bacteroidetes; c Bacteroidia; o Bacteroidales; f [Odoribacteraceae]; g Odoribacter; s                 | 0.0197 | 0.0931 | 0.0273 | 0.0658  | 0.0227 |
| 78  | 310479  | Root; k Bacteria; p Firmicutes; c Clostridia; o Clostridiales; f Lachnospiraceae; g ; s                                   | 0.0203 | 0.0914 | 0.0041 | 0.0873  | 0.0303 |
| 79  | 188457  | Root; k Bacteria; p Firmicutes; c Clostridia; o Clostridiales; f Ruminococcaceae; g ; s                                   | 0.0208 | 0.0359 | 0.0989 | -0.0630 | 0.0219 |
| 80  | 261132  | Root; k Bacteria; p Firmicutes; c Clostridia; o Coriobacteriales; f ; g ; s                                               | 0.0219 | 0.0200 | 0.0072 | 0.0128  | 0.0045 |
| 81  | 233169  | Root; k Bacteria; p Firmicutes; c Clostridia; o Clostridiales; f Ruminococcaceae; g ; s                                   | 0.0224 | 0.0000 | 0.1254 | -0.1254 | 0.0444 |
| 82  | 237003  | Root; k Bacteria; p Firmicutes; c Clostridia; o Clostridiales; f Ruminococcaceae; g ; s                                   | 0.0228 | 0.1660 | 0.0000 | 0.1660  | 0.0591 |
| 83  | 827376  | Root; k Bacteria; p Firmicutes; c Clostridia; o Clostridiales; f Ruminococcaceae; g ; s                                   | 0.0229 | 0.0000 | 0.1923 | -0.1923 | 0.0685 |
| 84  | 449353  | Root; k Bacteria; p Firmicutes; c Clostridia; o Clostridiales; f Dehalobacteriaceae; g Dehalobacterium; s                 | 0.0231 | 0.1283 | 0.0571 | 0.0712  | 0.0254 |
| 85  | 307595  | Root; k Bacteria; p Firmicutes; c Clostridia; o Clostridiales; f Lachnospiraceae; g ; s                                   | 0.0241 | 0.0173 | 0.1205 | -0.1032 | 0.0372 |
| 86  | 250361  | Root; k Bacteria; p Firmicutes; c Clostridia; o Clostridiales; f Ruminococcaceae; g ; s                                   | 0.0246 | 0.0069 | 0.1198 | -0.1129 | 0.0409 |
| 87  | 234036  | Root; k Bacteria; p Bacteroidetes; c Bacteroidia; o Bacteroidales; f S24-7; g ; s                                         | 0.0257 | 1.0740 | 1.6922 | -0.6182 | 0.2262 |
| 88  | 273208  | Root; k Bacteria; p Bacteroidetes; c Bacteroidia; o Bacteroidales; f S24-7; g ; s                                         | 0.0265 | 0.1546 | 0.0075 | 0.1471  | 0.0542 |
| 89  | 261064  | Root; k Bacteria; p Firmicutes; c Clostridia; o Clostridiales; f Lachnospiraceae; g ; s                                   | 0.0267 | 0.0578 | 0.0077 | 0.0502  | 0.0185 |
| 90  | 269653  | Root; k Bacteria; p Firmicutes; c Clostridia; o Clostridiales; f Lachnospiraceae; g ; s                                   | 0.0290 | 0.2611 | 0.0000 | 0.2611  | 0.0983 |
| 91  | 132165  | Root; k Bacteria; p Firmicutes; c Clostridia; o Clostridiales; f Lachnospiraceae; g ; s                                   | 0.0296 | 0.0764 | 0.0161 | 0.0603  | 0.0228 |
| 92  | 173642  | Root; k Bacteria; p Firmicutes; c Clostridia; o Clostridiales; f Clostridiaceae; g ; s                                    | 0.0318 | 0.0703 | 0.0183 | 0.0520  | 0.0200 |
| 93  | 209030  | Root; k Bacteria; p Bacteroidetes; c Bacteroidia; o Bacteroidales; f S24-7; g ; s                                         | 0.0318 | 0.0316 | 0.0037 | 0.0278  | 0.0107 |
| 94  | 273776  | Root; k Bacteria; p Firmicutes; c Clostridia; o Clostridiales; f Lachnospiraceae; g [Ruminococcus]; s gnavus              | 0.0321 | 0.0926 | 0.0115 | 0.0811  | 0.0313 |
| 95  | 265548  | Root; k Bacteria; p Firmicutes; c Clostridia; o Clostridiales; f Lachnospiraceae; g ; s                                   | 0.0323 | 0.0457 | 0.0000 | 0.0457  | 0.0177 |
| 96  | 176957  | Root; k Bacteria; p Firmicutes; c Clostridia; o Clostridiales; f Ruminococcaceae; g Ruminococcus; s                       | 0.0324 | 0.0233 | 0.0035 | 0.0198  | 0.0076 |
| 97  | 1110008 | Root; k Bacteria; p Firmicutes; c Clostridia; o Clostridiales; f Ruminococcaceae; g Ruminococcus; s                       | 0.0338 | 0.0865 | 0.0237 | 0.0628  | 0.0246 |
| 98  | 176118  | Root; k Bacteria; p Firmicutes; c Clostridia; o Clostridiales; f Ruminococcaceae; g Ruminococcus; s                       | 0.0348 | 0.1589 | 0.0041 | 0.1548  | 0.0610 |
| 99  | 192084  | Root; k Bacteria; p Firmicutes; c Clostridia; o Clostridiales; f Lachnospiraceae; g ; s                                   | 0.0349 | 0.0757 | 0.0035 | 0.0722  | 0.0285 |
| 100 | 233805  | Root; k Bacteria; p Bacteroidetes; c Bacteroidia; o Bacteroidales; f Rikenellaceae; g ; s                                 | 0.0363 | 0.0232 | 0.0037 | 0.0195  | 0.0078 |
| 101 | 185989  | Root; k Bacteria; p Firmicutes; c Clostridia; o Clostridiales; f Lachnospiraceae; g ; s                                   | 0.0368 | 0.3148 | 0.0147 | 0.3000  | 0.1199 |
| 102 | 259556  | Root; k Bacteria; p Firmicutes; c Clostridia; o Clostridiales; f Lachnospiraceae; g ; s                                   | 0.0374 | 0.0000 | 0.0225 | -0.0225 | 0.0090 |
| 103 | 232275  | Root; k Bacteria; p Firmicutes; c Clostridia; o Clostridiales; f Ruminococcaceae; g ; s                                   | 0.0379 | 0.3078 | 0.0839 | 0.2238  | 0.0901 |
| 104 | 463794  | Root; k Bacteria; p Firmicutes; c Bacilli; o Lactobacillales; f Lactobacillaceae; g ; s                                   | 0.0391 | 0.0000 | 0.0878 | -0.0878 | 0.0357 |

|     |         |                                                                                                              |        |        |        |         |        |
|-----|---------|--------------------------------------------------------------------------------------------------------------|--------|--------|--------|---------|--------|
| 105 | 182273  | Root; k_Bacteria; p_Firmicutes; c_Clostridia; o_Clostridiales; f_Lachnospiraceae; g_ ; s_                    | 0.0400 | 0.1642 | 0.0276 | 0.1365  | 0.0557 |
| 106 | 167252  | Root; k_Bacteria; p_Firmicutes; c_Clostridia; o_Clostridiales; f_Lachnospiraceae; g_ ; s_                    | 0.0404 | 0.7951 | 0.1528 | 0.6423  | 0.2630 |
| 107 | 170131  | Root; k_Bacteria; p_Firmicutes; c_Clostridia; o_Clostridiales; f_Lachnospiraceae; g_ ; s_                    | 0.0405 | 0.0000 | 0.0121 | -0.0121 | 0.0050 |
| 108 | 176582  | Root; k_Bacteria; p_Firmicutes; c_Clostridia; o_Clostridiales; f_Ruminococcaceae; g_Ruminococcus; s_         | 0.0406 | 0.0000 | 0.0120 | -0.0120 | 0.0049 |
| 109 | 275913  | Root; k_Bacteria; p_Firmicutes; c_Clostridia; o_Clostridiales; f_Lachnospiraceae; g_[Ruminococcus]; s_gnavus | 0.0406 | 0.0000 | 0.0120 | -0.0120 | 0.0049 |
| 110 | 197624  | Root; k_Bacteria; p_Firmicutes; c_Clostridia; o_ ; f_ ; g_ ; s_                                              | 0.0407 | 0.0125 | 0.0000 | 0.0125  | 0.0051 |
| 111 | 178358  | Root; k_Bacteria; p_Firmicutes; c_Clostridia; o_Clostridiales; f_Lachnospiraceae; g_ ; s_                    | 0.0408 | 0.0000 | 0.0113 | -0.0113 | 0.0047 |
| 112 | 470527  | Root; k_Bacteria; p_Firmicutes; c_Bacilli; o_Lactobacillales; f_Lactobacillaceae; g_Lactobacillus; s_        | 0.0408 | 1.2890 | 2.2437 | -0.9547 | 0.3919 |
| 113 | 275954  | Root; k_Bacteria; p_Firmicutes; c_Clostridia; o_Clostridiales; f_Lachnospiraceae; g_ ; s_                    | 0.0409 | 0.0115 | 0.0000 | 0.0115  | 0.0047 |
| 114 | 303076  | Root; k_Bacteria; p_Firmicutes; c_Clostridia; o_Clostridiales; f_Lachnospiraceae; g_ ; s_                    | 0.0409 | 0.0115 | 0.0000 | 0.0115  | 0.0047 |
| 115 | 258423  | Root; k_Bacteria; p_Firmicutes; c_Clostridia; o_Clostridiales; f_Lachnospiraceae; g_ ; s_                    | 0.0413 | 0.0000 | 0.0498 | -0.0498 | 0.0205 |
| 116 | 266343  | Root; k_Bacteria; p_Firmicutes; c_Clostridia; o_Clostridiales; f_Lachnospiraceae; g_ ; s_                    | 0.0414 | 0.3225 | 0.0690 | 0.2535  | 0.1045 |
| 117 | 186194  | Root; k_Bacteria; p_Firmicutes; c_Clostridia; o_Clostridiales; f_Ruminococcaceae; g_Ruminococcus; s_         | 0.0421 | 0.0524 | 0.0072 | 0.0452  | 0.0187 |
| 118 | 1137893 | Root; k_Bacteria; p_Cyanobacteria; c_Chloroplast; o_Streptophyta; f_ ; g_ ; s_                               | 0.0421 | 0.0121 | 0.0000 | 0.0121  | 0.0050 |
| 119 | 386765  | Root; k_Bacteria; p_Firmicutes; c_Clostridia; o_Clostridiales; f_Ruminococcaceae; g_Oscillospira; s_         | 0.0422 | 0.0118 | 0.0000 | 0.0118  | 0.0049 |
| 120 | 269107  | Root; k_Bacteria; p_Firmicutes; c_Clostridia; o_Clostridiales; f_Lachnospiraceae; g_[Ruminococcus]; s_gnavus | 0.0428 | 0.0424 | 0.0145 | 0.0280  | 0.0116 |
| 121 | 271480  | Root; k_Bacteria; p_Firmicutes; c_Clostridia; o_Clostridiales; f_Lachnospiraceae; g_ ; s_                    | 0.0440 | 0.1943 | 0.0157 | 0.1786  | 0.0748 |
| 122 | 295075  | Root; k_Bacteria; p_Firmicutes; c_Clostridia; o_Clostridiales; f_Lachnospiraceae; g_ ; s_                    | 0.0446 | 0.0308 | 0.0000 | 0.0308  | 0.0129 |
| 123 | 260666  | Root; k_Bacteria; p_Firmicutes; c_Clostridia; o_Clostridiales; f_Lachnospiraceae; g_ ; s_                    | 0.0471 | 0.0000 | 0.0239 | -0.0239 | 0.0102 |
| 124 | 323829  | Root; k_Bacteria; p_Firmicutes; c_Clostridia; o_Clostridiales; f_Lachnospiraceae; g_ ; s_                    | 0.0476 | 0.4825 | 0.0948 | 0.3878  | 0.1659 |
| 125 | 194878  | Root; k_Bacteria; p_Firmicutes; c_Clostridia; o_Clostridiales; f_Lachnospiraceae; g_ ; s_                    | 0.0497 | 0.0282 | 0.0000 | 0.0282  | 0.0122 |
| 126 | 264941  | Root; k_Bacteria; p_Firmicutes; c_Clostridia; o_Clostridiales; f_Ruminococcaceae; g_Ruminococcus; s_         | 0.0499 | 0.0948 | 0.0217 | 0.0731  | 0.0317 |

WT water versus WT P80

| Prok_MSA# | Taxonomy                                                                                                         | P value  | Mean water-treated | Mean P80-treated | Difference | SE of difference |
|-----------|------------------------------------------------------------------------------------------------------------------|----------|--------------------|------------------|------------|------------------|
| 1         | 1107461 Root; k Bacteria; p Firmicutes; c Clostridia; o Clostridiales; f Lachnospiraceae; g ; s                  | < 0.0001 | 0.0000             | 1.1741           | -1.1741    | 0.1426           |
| 2         | 105349 Root; k Bacteria; p Firmicutes; c Clostridia; o Clostridiales; f Ruminococcaceae; g ; s                   | < 0.0001 | 0.0190             | 0.3149           | -0.2959    | 0.0358           |
| 3         | 276643 Root; k Bacteria; p Firmicutes; c Clostridia; o Clostridiales; f Lachnospiraceae; g ; s                   | < 0.0001 | 0.0000             | 0.0858           | -0.0858    | 0.0048           |
| 4         | 863612 Root; k Bacteria; p Firmicutes; c Clostridia; o Clostridiales; f Ruminococcaceae; g ; s                   | < 0.0001 | 0.0000             | 0.1018           | -0.1018    | 0.0075           |
| 5         | 214715 Root; k Bacteria; p Bacteroidetes; c Bacteroidia; o Bacteroidales; f S24-7; g ; s                         | < 0.0001 | 1.2294             | 2.8614           | -1.6319    | 0.1814           |
| 6         | 187151 Root; k Bacteria; p Firmicutes; c Clostridia; o Clostridiales; f Ruminococcaceae; g Ruminococcus; s       | < 0.0001 | 0.0758             | 0.0000           | 0.0758     | 0.0087           |
| 7         | 228329 Root; k Bacteria; p Bacteroidetes; c Bacteroidia; o Bacteroidales; f S24-7; g ; s                         | 0.0001   | 3.4245             | 0.0000           | 3.4245     | 0.4431           |
| 8         | 355746 Root; k Bacteria; p Bacteroidetes; c Bacteroidia; o Bacteroidales; f S24-7; g ; s                         | 0.0005   | 3.4795             | 0.1496           | 3.3298     | 0.5397           |
| 9         | 838703 Root; k Bacteria; p Firmicutes; c Clostridia; o Clostridiales; f Ruminococcaceae; g ; s                   | 0.0005   | 0.0041             | 0.1198           | -0.1157    | 0.0193           |
| 10        | 258423 Root; k Bacteria; p Firmicutes; c Clostridia; o Clostridiales; f Lachnospiraceae; g ; s                   | 0.0010   | 0.0000             | 0.0746           | -0.0746    | 0.0139           |
| 11        | 305880 Root; k Bacteria; p Firmicutes; c Clostridia; o Clostridiales; f Lachnospiraceae; g ; s                   | 0.0012   | 0.1045             | 0.0113           | 0.0933     | 0.0179           |
| 12        | 173909 Root; k Bacteria; p Firmicutes; c Clostridia; o Clostridiales; f Lachnospiraceae; g ; s                   | 0.0012   | 0.0000             | 0.0765           | -0.0765    | 0.0147           |
| 13        | 260752 Root; k Bacteria; p Firmicutes; c Clostridia; o Clostridiales; f Lachnospiraceae; g ; s                   | 0.0014   | 0.0075             | 0.0462           | -0.0387    | 0.0076           |
| 14        | 303184 Root; k Bacteria; p Firmicutes; c Clostridia; o Clostridiales; f Lachnospiraceae; g ; s                   | 0.0014   | 0.0240             | 0.0000           | 0.0240     | 0.0047           |
| 15        | 295564 Root; k Bacteria; p Bacteroidetes; c Bacteroidia; o Bacteroidales; f S24-7; g ; s                         | 0.0015   | 2.6640             | 1.3602           | 1.3038     | 0.2573           |
| 16        | 179681 Root; k Bacteria; p Bacteroidetes; c Bacteroidia; o Bacteroidales; f S24-7; g ; s                         | 0.0015   | 0.6526             | 0.1641           | 0.4885     | 0.0966           |
| 17        | 348875 Root; k Bacteria; p Firmicutes; c Clostridia; o Clostridiales; f Lachnospiraceae; g ; s                   | 0.0018   | 0.0241             | 0.0000           | 0.0241     | 0.0049           |
| 18        | 264023 Root; k Bacteria; p Bacteroidetes; c Bacteroidia; o Bacteroidales; f S24-7; g ; s                         | 0.0021   | 0.0282             | 0.0000           | 0.0282     | 0.0059           |
| 19        | 308076 Root; k Bacteria; p Bacteroidetes; c Bacteroidia; o Bacteroidales; f S24-7; g ; s                         | 0.0030   | 0.4787             | 3.7440           | -3.2653    | 0.7365           |
| 20        | 268927 Root; k Bacteria; p Firmicutes; c Clostridia; o Clostridiales; f Lachnospiraceae; g ; s                   | 0.0030   | 0.0035             | 0.0706           | -0.0671    | 0.0152           |
| 21        | 308617 Root; k Bacteria; p Bacteroidetes; c Bacteroidia; o Bacteroidales; f Rikenellaceae; g ; s                 | 0.0036   | 0.0235             | 0.3618           | -0.3383    | 0.0788           |
| 22        | 174791 Root; k Bacteria; p Bacteroidetes; c Bacteroidia; o Bacteroidales; f S24-7; g ; s                         | 0.0040   | 0.0245             | 0.0000           | 0.0245     | 0.0058           |
| 23        | 312892 Root; k Bacteria; p Firmicutes; c Clostridia; o ; f ; g ; s                                               | 0.0051   | 0.2030             | 0.0318           | 0.1712     | 0.0426           |
| 24        | 262752 Root; k Bacteria; p Bacteroidetes; c Bacteroidia; o Bacteroidales; f S24-7; g ; s                         | 0.0052   | 0.1041             | 0.0220           | 0.0820     | 0.0205           |
| 25        | 327284 Root; k Bacteria; p Firmicutes; c Clostridia; o Clostridiales; f Lachnospiraceae; g ; s                   | 0.0053   | 0.0395             | 0.0000           | 0.0395     | 0.0099           |
| 26        | 334098 Root; k Bacteria; p Firmicutes; c Clostridia; o Clostridiales; f Lachnospiraceae; g ; s                   | 0.0054   | 0.1737             | 0.0673           | 0.1065     | 0.0269           |
| 27        | 1110008 Root; k Bacteria; p Firmicutes; c Clostridia; o Clostridiales; f Ruminococcaceae; g Ruminococcus; s      | 0.0055   | 0.0865             | 0.0000           | 0.0865     | 0.0219           |
| 28        | 827376 Root; k Bacteria; p Firmicutes; c Clostridia; o Clostridiales; f Ruminococcaceae; g ; s                   | 0.0063   | 0.0000             | 0.1133           | -0.1133    | 0.0295           |
| 29        | 335508 Root; k Bacteria; p Firmicutes; c Clostridia; o Clostridiales; f Lachnospiraceae; g ; s                   | 0.0070   | 0.9007             | 0.1864           | 0.7143     | 0.1898           |
| 30        | 214655 Root; k Bacteria; p Firmicutes; c Clostridia; o Clostridiales; f Lachnospiraceae; g ; s                   | 0.0074   | 0.1145             | 0.4113           | -0.2969    | 0.0796           |
| 31        | 261500 Root; k Bacteria; p Firmicutes; c Clostridia; o Clostridiales; f Ruminococcaceae; g Oscillospira; s       | 0.0074   | 0.2127             | 0.0217           | 0.1910     | 0.0512           |
| 32        | 175646 Root; k Bacteria; p Bacteroidetes; c Bacteroidia; o Bacteroidales; f S24-7; g ; s                         | 0.0082   | 0.0347             | 0.0000           | 0.0347     | 0.0095           |
| 33        | 179037 Root; k Bacteria; p Firmicutes; c Clostridia; o Clostridiales; f Lachnospiraceae; g ; s                   | 0.0105   | 0.1835             | 0.0382           | 0.1454     | 0.0420           |
| 34        | 174770 Root; k Bacteria; p Firmicutes; c Clostridia; o Clostridiales; f Ruminococcaceae; g Ruminococcus; s       | 0.0106   | 0.0160             | 0.0000           | 0.0160     | 0.0046           |
| 35        | 303454 Root; k Bacteria; p Firmicutes; c Clostridia; o Clostridiales; f Ruminococcaceae; g Oscillospira; s       | 0.0106   | 0.0160             | 0.0000           | 0.0160     | 0.0046           |
| 36        | 176868 Root; k Bacteria; p Firmicutes; c Clostridia; o Clostridiales; f Dehalobacteriaceae; g Dehalobacterium; s | 0.0113   | 0.1667             | 0.0370           | 0.1297     | 0.0381           |
| 37        | 373939 Root; k Bacteria; p Firmicutes; c Clostridia; o Coriobacteriales; f Coriobacteriaceae; g Adlercreutzia; s | 0.0120   | 0.1119             | 0.0500           | 0.0619     | 0.0184           |
| 38        | 259667 Root; k Bacteria; p Firmicutes; c Clostridia; o Coriobacteriales; f ; g ; s                               | 0.0126   | 0.2994             | 0.0389           | 0.2604     | 0.0782           |
| 39        | 317031 Root; k Bacteria; p Firmicutes; c Clostridia; o Clostridiales; f Lachnospiraceae; g ; s                   | 0.0130   | 0.1796             | 0.0247           | 0.1548     | 0.0468           |
| 40        | 184122 Root; k Bacteria; p Firmicutes; c Clostridia; o Clostridiales; f Lachnospiraceae; g ; s                   | 0.0132   | 0.0467             | 0.4966           | -0.4499    | 0.1366           |
| 41        | 233991 Root; k Bacteria; p Firmicutes; c Clostridia; o Clostridiales; f Lachnospiraceae; g ; s                   | 0.0133   | 0.0000             | 0.1870           | -0.1870    | 0.0568           |
| 42        | 265669 Root; k Bacteria; p Firmicutes; c Clostridia; o Clostridiales; f Ruminococcaceae; g Ruminococcus; s       | 0.0135   | 0.2054             | 0.0734           | 0.1320     | 0.0403           |
| 43        | 250361 Root; k Bacteria; p Firmicutes; c Clostridia; o Clostridiales; f Ruminococcaceae; g ; s                   | 0.0138   | 0.0069             | 0.1521           | -0.1452    | 0.0445           |
| 44        | 827522 Root; k Bacteria; p Firmicutes; c Clostridia; o Clostridiales; f Ruminococcaceae; g ; s                   | 0.0147   | 0.0463             | 0.1815           | -0.1351    | 0.0420           |
| 45        | 658370 Root; k Bacteria; p Firmicutes; c Clostridia; o Clostridiales; f Lachnospiraceae; g ; s                   | 0.0153   | 0.0344             | 0.0000           | 0.0344     | 0.0108           |
| 46        | 263977 Root; k Bacteria; p Firmicutes; c Clostridia; o Clostridiales; f Ruminococcaceae; g Oscillospira; s       | 0.0161   | 0.0765             | 0.0408           | 0.0358     | 0.0113           |
| 47        | 1844565 Root; k Bacteria; p Firmicutes; c Clostridia; o Clostridiales; f Lachnospiraceae; g ; s                  | 0.0162   | 0.0000             | 0.0698           | -0.0698    | 0.0222           |
| 48        | 544392 Root; k Bacteria; p Firmicutes; c Clostridia; o Clostridiales; f ; g ; s                                  | 0.0173   | 0.0196             | 0.0000           | 0.0196     | 0.0063           |
| 49        | 269949 Root; k Bacteria; p Firmicutes; c Clostridia; o Clostridiales; f Lachnospiraceae; g ; s                   | 0.0178   | 0.0869             | 0.0339           | 0.0530     | 0.0172           |
| 50        | 191573 Root; k Bacteria; p Firmicutes; c Clostridia; o Clostridiales; f Lachnospiraceae; g ; s                   | 0.0186   | 0.2728             | 2.9144           | -2.6416    | 0.8660           |

|     |         |         |             |                   |                          |                       |                       |                    |        |        |        |         |         |        |
|-----|---------|---------|-------------|-------------------|--------------------------|-----------------------|-----------------------|--------------------|--------|--------|--------|---------|---------|--------|
| 51  | 265563  | Root; k | Bacteria; p | Firmicutes; c     | Clostridia; o            | Clostridiales; f      | Lachnospiraceae; g    | ; s                | 0.0186 | 0.0000 | 0.0193 | -0.0193 | 0.0063  |        |
| 52  | 182033  | Root; k | Bacteria; p | Firmicutes; c     | Clostridia; o            | Clostridiales; f      | Ruminococcaceae; g    | Oscillospira; s    | 0.0188 | 0.0589 | 0.0042 | 0.0547  | 0.0180  |        |
| 53  | 321484  | Root; k | Bacteria; p | Firmicutes; c     | Clostridia; o            | Clostridiales; f      | Ruminococcaceae; g    | Ruminococcus; s    | 0.0189 | 0.0082 | 0.0360 | -0.0278 | 0.0092  |        |
| 54  | 174056  | Root; k | Bacteria; p | Bacteroidetes; c  | Bacteroidia; o           | Bacteroidales; f      | S24-7; g              | ; s                | 0.0195 | 0.3347 | 0.1716 | 0.1632  | 0.0541  |        |
| 55  | 271131  | Root; k | Bacteria; p | Bacteroidetes; c  | Bacteroidia; o           | Bacteroidales; f      | S24-7; g              | ; s                | 0.0198 | 0.0149 | 0.0414 | -0.0264 | 0.0088  |        |
| 56  | 258910  | Root; k | Bacteria; p | Bacteroidetes; c  | Bacteroidia; o           | Bacteroidales; f      | S24-7; g              | ; s                | 0.0198 | 0.7618 | 0.3412 | 0.4206  | 0.1400  |        |
| 57  | 177590  | Root; k | Bacteria; p | Firmicutes; c     | Clostridia; o            | Clostridiales; f      | Lachnospiraceae; g    | ; s                | 0.0199 | 0.0000 | 0.0153 | -0.0153 | 0.0051  |        |
| 58  | 331737  | Root; k | Bacteria; p | Firmicutes; c     | Clostridia; o            | Clostridiales; f      | Ruminococcaceae; g    | Ruminococcus; s    | 0.0205 | 0.0447 | 0.0000 | 0.0447  | 0.0150  |        |
| 59  | 162576  | Root; k | Bacteria; p | Firmicutes; c     | Clostridia; o            | Clostridiales; f      | Lachnospiraceae; g    | ; s                | 0.0206 | 0.1215 | 0.0389 | 0.0826  | 0.0277  |        |
| 60  | 183053  | Root; k | Bacteria; p | Firmicutes; c     | Clostridia; o            | Clostridiales; f      | Lachnospiraceae; g    | ; s                | 0.0208 | 0.0841 | 0.0209 | 0.0632  | 0.0213  |        |
| 61  | 262944  | Root; k | Bacteria; p | Firmicutes; c     | Clostridia; o            | Clostridiales; f      | Ruminococcaceae; g    | ; s                | 0.0220 | 0.0440 | 0.0082 | 0.0358  | 0.0122  |        |
| 62  | 320912  | Root; k | Bacteria; p | Firmicutes; c     | Clostridia; o            | Clostridiales; f      | Lachnospiraceae; g    | ; s                | 0.0224 | 0.0000 | 0.0937 | -0.0937 | 0.0321  |        |
| 63  | 188266  | Root; k | Bacteria; p | Firmicutes; c     | Clostridia; o            | Clostridiales; f      | Lachnospiraceae; g    | ; s                | 0.0229 | 0.0000 | 0.0437 | -0.0437 | 0.0150  |        |
| 64  | 173245  | Root; k | Bacteria; p | Firmicutes; c     | Clostridia; o            | Clostridiales; f      | Ruminococcaceae; g    | ; s                | 0.0236 | 0.0000 | 0.0299 | -0.0299 | 0.0104  |        |
| 65  | 275895  | Root; k | Bacteria; p | Firmicutes; c     | Clostridia; o            | Clostridiales; f      | Lachnospiraceae; g    | ; s                | 0.0246 | 0.0000 | 0.0207 | -0.0207 | 0.0072  |        |
| 66  | 267216  | Root; k | Bacteria; p | Firmicutes; c     | Clostridia; o            | Clostridiales; f      | Ruminococcaceae; g    | ; s                | 0.0249 | 0.0039 | 0.0556 | -0.0517 | 0.0182  |        |
| 67  | 265730  | Root; k | Bacteria; p | Firmicutes; c     | Clostridia; o            | Clostridiales; f      | Lachnospiraceae; g    | ; s                | 0.0250 | 0.0351 | 0.0000 | 0.0351  | 0.0123  |        |
| 68  | 1095264 | Root; k | Bacteria; p | Bacteroidetes; c  | Bacteroidia; o           | Bacteroidales; f      | ; g                   | ; s                | 0.0251 | 0.0000 | 0.0173 | -0.0173 | 0.0061  |        |
| 69  | 206324  | Root; k | Bacteria; p | Bacteroidetes; c  | Bacteroidia; o           | Bacteroidales; f      | S24-7; g              | ; s                | 0.0258 | 0.0122 | 0.0632 | -0.0510 | 0.0181  |        |
| 70  | 279026  | Root; k | Bacteria; p | Firmicutes; c     | Clostridia; o            | Clostridiales; f      | Lachnospiraceae; g    | [Ruminococcus]; s  | gnavus | 0.0264 | 0.0035 | 0.0936  | -0.0901 | 0.0321 |
| 71  | 195445  | Root; k | Bacteria; p | Firmicutes; c     | Clostridia; o            | Clostridiales; f      | Lachnospiraceae; g    | ; s                | 0.0265 | 0.0035 | 0.0297 | -0.0262 | 0.0094  |        |
| 72  | 176977  | Root; k | Bacteria; p | Firmicutes; c     | Clostridia; o            | Clostridiales; f      | Lachnospiraceae; g    | ; s                | 0.0266 | 1.3625 | 0.0506 | 1.3119  | 0.4687  |        |
| 73  | 132165  | Root; k | Bacteria; p | Firmicutes; c     | Clostridia; o            | Clostridiales; f      | Lachnospiraceae; g    | ; s                | 0.0278 | 0.0764 | 0.0082 | 0.0681  | 0.0246  |        |
| 74  | 339549  | Root; k | Bacteria; p | Bacteroidetes; c  | Bacteroidia; o           | Bacteroidales; f      | S24-7; g              | ; s                | 0.0279 | 0.0612 | 0.0000 | 0.0612  | 0.0221  |        |
| 75  | 228046  | Root; k | Bacteria; p | Firmicutes; c     | Clostridia; o            | Clostridiales; f      | Lachnospiraceae; g    | ; s                | 0.0285 | 0.0000 | 0.0362 | -0.0362 | 0.0132  |        |
| 76  | 264629  | Root; k | Bacteria; p | Firmicutes; c     | Clostridia; o            | Clostridiales; f      | Lachnospiraceae; g    | ; s                | 0.0287 | 0.1267 | 0.0128 | 0.1139  | 0.0415  |        |
| 77  | 183606  | Root; k | Bacteria; p | Firmicutes; c     | Clostridia; o            | Clostridiales; f      | Lachnospiraceae; g    | ; s                | 0.0287 | 0.0988 | 0.0000 | 0.0988  | 0.0360  |        |
| 78  | 261132  | Root; k | Bacteria; p | Firmicutes; c     | Clostridia; o            | Coriobacteriales; f   | ; g                   | ; s                | 0.0289 | 0.0200 | 0.0082 | 0.0118  | 0.0043  |        |
| 79  | 270571  | Root; k | Bacteria; p | Firmicutes; c     | Clostridia; o            | Clostridiales; f      | Ruminococcaceae; g    | Ruminococcus; s    | 0.0293 | 0.1127 | 0.0144 | 0.0983  | 0.0360  |        |
| 80  | 269103  | Root; k | Bacteria; p | Firmicutes; c     | Clostridia; o            | Clostridiales; f      | Lachnospiraceae; g    | ; s                | 0.0294 | 0.0000 | 0.4875 | -0.4875 | 0.1786  |        |
| 81  | 197099  | Root; k | Bacteria; p | Firmicutes; c     | Clostridia; o            | Clostridiales; f      | Ruminococcaceae; g    | Ruminococcus; s    | 0.0302 | 0.0251 | 0.0000 | 0.0251  | 0.0093  |        |
| 82  | 261350  | Root; k | Bacteria; p | Bacteroidetes; c  | Bacteroidia; o           | Bacteroidales; f      | S24-7; g              | ; s                | 0.0315 | 0.0452 | 0.0000 | 0.0452  | 0.0169  |        |
| 83  | 209907  | Root; k | Bacteria; p | Firmicutes; c     | Clostridia; o            | Clostridiales; f      | Lachnospiraceae; g    | ; s                | 0.0325 | 0.6635 | 0.0000 | 0.6635  | 0.2496  |        |
| 84  | 449353  | Root; k | Bacteria; p | Firmicutes; c     | Clostridia; o            | Clostridiales; f      | Dehalobacteriaceae; g | Dehalobacterium; s | 0.0337 | 0.1283 | 0.0509 | 0.0774  | 0.0294  |        |
| 85  | 102480  | Root; k | Bacteria; p | Proteobacteria; c | Epsilonproteobacteria; o | Campylobacteriales; f | Helicobacteraceae; g  | Helicobacter; s    | 0.0338 | 0.2067 | 1.1921 | -0.9853 | 0.3744  |        |
| 86  | 190673  | Root; k | Bacteria; p | Bacteroidetes; c  | Bacteroidia; o           | Bacteroidales; f      | S24-7; g              | ; s                | 0.0345 | 0.0389 | 0.0084 | 0.0305  | 0.0116  |        |
| 87  | 180264  | Root; k | Bacteria; p | Firmicutes; c     | Clostridia; o            | Clostridiales; f      | Lachnospiraceae; g    | ; s                | 0.0364 | 0.0000 | 0.0178 | -0.0178 | 0.0069  |        |
| 88  | 188457  | Root; k | Bacteria; p | Firmicutes; c     | Clostridia; o            | Clostridiales; f      | Ruminococcaceae; g    | ; s                | 0.0369 | 0.0359 | 0.0048 | 0.0311  | 0.0121  |        |
| 89  | 186194  | Root; k | Bacteria; p | Firmicutes; c     | Clostridia; o            | Clostridiales; f      | Ruminococcaceae; g    | Ruminococcus; s    | 0.0384 | 0.0524 | 0.0000 | 0.0524  | 0.0206  |        |
| 90  | 273208  | Root; k | Bacteria; p | Bacteroidetes; c  | Bacteroidia; o           | Bacteroidales; f      | S24-7; g              | ; s                | 0.0387 | 0.1546 | 0.0000 | 0.1546  | 0.0609  |        |
| 91  | 610842  | Root; k | Bacteria; p | Firmicutes; c     | Clostridia; o            | Clostridiales; f      | Ruminococcaceae; g    | ; s                | 0.0402 | 0.0035 | 0.0375 | -0.0341 | 0.0136  |        |
| 92  | 258700  | Root; k | Bacteria; p | Firmicutes; c     | Clostridia; o            | Clostridiales; f      | Ruminococcaceae; g    | Oscillospira; s    | 0.0414 | 0.0538 | 0.0130 | 0.0407  | 0.0163  |        |
| 93  | 237003  | Root; k | Bacteria; p | Firmicutes; c     | Clostridia; o            | Clostridiales; f      | Ruminococcaceae; g    | ; s                | 0.0423 | 0.1660 | 0.0000 | 0.1660  | 0.0670  |        |
| 94  | 263138  | Root; k | Bacteria; p | Firmicutes; c     | Clostridia; o            | Clostridiales; f      | Lachnospiraceae; g    | ; s                | 0.0424 | 0.0198 | 0.1275 | -0.1077 | 0.0435  |        |
| 95  | 268696  | Root; k | Bacteria; p | Firmicutes; c     | Clostridia; o            | Clostridiales; f      | Lachnospiraceae; g    | ; s                | 0.0432 | 0.0000 | 0.0343 | -0.0343 | 0.0139  |        |
| 96  | 193509  | Root; k | Bacteria; p | Firmicutes; c     | Clostridia; o            | Clostridiales; f      | Lachnospiraceae; g    | Dorea; s           | 0.0436 | 0.0000 | 0.0293 | -0.0293 | 0.0119  |        |
| 97  | 231318  | Root; k | Bacteria; p | Firmicutes; c     | Clostridia; o            | Clostridiales; f      | Lachnospiraceae; g    | ; s                | 0.0447 | 0.0587 | 0.0096 | 0.0492  | 0.0201  |        |
| 98  | 833795  | Root; k | Bacteria; p | Firmicutes; c     | Clostridia; o            | Clostridiales; f      | Lachnospiraceae; g    | ; s                | 0.0452 | 0.0288 | 0.0000 | 0.0288  | 0.0118  |        |
| 99  | 276509  | Root; k | Bacteria; p | Bacteroidetes; c  | Bacteroidia; o           | Bacteroidales; f      | S24-7; g              | ; s                | 0.0461 | 0.0144 | 0.1134 | -0.0990 | 0.0409  |        |
| 100 | 429917  | Root; k | Bacteria; p | Bacteroidetes; c  | Bacteroidia; o           | Bacteroidales; f      | S24-7; g              | ; s                | 0.0465 | 0.0000 | 0.0402 | -0.0402 | 0.0167  |        |
| 101 | 344108  | Root; k | Bacteria; p | Firmicutes; c     | Clostridia; o            | Clostridiales; f      | Lachnospiraceae; g    | ; s                | 0.0491 | 0.0000 | 0.0355 | -0.0355 | 0.0149  |        |
| 102 | 350256  | Root; k | Bacteria; p | Firmicutes; c     | Clostridia; o            | Clostridiales; f      | Ruminococcaceae; g    | Ruminococcus; s    | 0.0498 | 0.0538 | 0.0048 | 0.0490  | 0.0207  |        |

IL10<sup>-/-</sup> water versus IL10<sup>-/-</sup> CMC

| Prok_MSA # | Taxonomy                                                                                                                                  | P value  | Mean water-treated | Mean CMC-treated | Difference | SE of difference |
|------------|-------------------------------------------------------------------------------------------------------------------------------------------|----------|--------------------|------------------|------------|------------------|
| 1          | 102627 Root; k Bacteria; p Firmicutes; c Erysipelotrichi; o Erysipelotrichales; f [Coprobacillaceae]; g ; s                               | < 0.0001 | 0.0037             | 2.0297           | -2.0260    | 0.3492           |
| 2          | 4086959 Root; k Bacteria; p Firmicutes; c Clostridia; o Clostridiales; f Lachnospiraceae; g ; s                                           | < 0.0001 | 0.0000             | 0.1623           | -0.1623    | 0.0262           |
| 3          | 358939 Root; k Bacteria; p Firmicutes; c Clostridia; o Clostridiales; f Lachnospiraceae; g ; s                                            | < 0.0001 | 0.0000             | 0.0839           | -0.0839    | 0.0066           |
| 4          | 431900 Root; k Bacteria; p Bacteroidetes; c Bacteroidia; o Bacteroidales; f S24-7; g ; s                                                  | < 0.0001 | 1.5851             | 0.0886           | 1.4965     | 0.2109           |
| 5          | 578016 Root; k Bacteria; p Bacteroidetes; c Bacteroidia; o Bacteroidales; f Porphyromonadaceae; g Parabacteroides; s distasonis           | < 0.0001 | 0.0000             | 1.1215           | -1.1215    | 0.0697           |
| 6          | 336193 Root; k Bacteria; p Proteobacteria; c Betaproteobacteria; o Burkholderiales; f Alcaligenaceae; g Sutterella; s                     | < 0.0001 | 0.1154             | 2.0919           | -1.9765    | 0.2116           |
| 7          | 264696 Root; k Bacteria; p Verrucomicrobia; c Verrucomicrobiae; o Verrucomicrobiales; f Verrucomicrobiaceae; g Akkermansia; s muciniphila | 0.0001   | 0.7131             | 25.9677          | -25.2546   | 4.5886           |
| 8          | 178954 Root; k Bacteria; p Firmicutes; c Clostridia; o Clostridiales; f Lachnospiraceae; g Blautia; s                                     | 0.0002   | 0.0000             | 0.0958           | -0.0958    | 0.0183           |
| 9          | 169077 Root; k Bacteria; p Firmicutes; c Clostridia; o Clostridiales; f Lachnospiraceae; g [Ruminococcus]; s                              | 0.0002   | 0.0000             | 0.0414           | -0.0414    | 0.0081           |
| 10         | 195123 Root; k Bacteria; p Bacteroidetes; c Bacteroidia; o Bacteroidales; f Porphyromonadaceae; g Parabacteroides; s                      | 0.0003   | 0.0000             | 0.0111           | -0.0111    | 0.0022           |
| 11         | 273707 Root; k Bacteria; p Firmicutes; c Clostridia; o Clostridiales; f Ruminococcaceae; g Ruminococcus; s                                | 0.0004   | 0.0000             | 0.0213           | -0.0213    | 0.0044           |
| 12         | 1537819 Root; k Bacteria; p Firmicutes; c Clostridia; o Clostridiales; f Lachnospiraceae; g [Ruminococcus]; s                             | 0.0004   | 0.0000             | 0.0201           | -0.0201    | 0.0042           |
| 13         | 179157 Root; k Bacteria; p Bacteroidetes; c Bacteroidia; o Bacteroidales; f Porphyromonadaceae; g Parabacteroides; s distasonis           | 0.0004   | 0.0000             | 0.0101           | -0.0101    | 0.0021           |
| 14         | 523589 Root; k Bacteria; p Firmicutes; c Clostridia; o Clostridiales; f Clostridiaceae; g Clostridium; s neonatale                        | 0.0005   | 0.0018             | 5.8321           | -5.8303    | 1.2332           |
| 15         | 194225 Root; k Bacteria; p Bacteroidetes; c Bacteroidia; o Bacteroidales; f S24-7; g ; s                                                  | 0.0005   | 0.5578             | 0.0028           | 0.5550     | 0.1178           |
| 16         | 214715 Root; k Bacteria; p Bacteroidetes; c Bacteroidia; o Bacteroidales; f S24-7; g ; s                                                  | 0.0006   | 0.6475             | 6.9231           | -6.2756    | 1.3574           |
| 17         | 199455 Root; k Bacteria; p Firmicutes; c Clostridia; o Clostridiales; f Lachnospiraceae; g Blautia; s                                     | 0.0008   | 0.0037             | 0.5725           | -0.5688    | 0.1270           |
| 18         | 312322 Root; k Bacteria; p Bacteroidetes; c Bacteroidia; o Bacteroidales; f S24-7; g ; s                                                  | 0.0009   | 0.5130             | 0.0038           | 0.5092     | 0.1160           |
| 19         | 331117 Root; k Bacteria; p Firmicutes; c Clostridia; o Clostridiales; f Lachnospiraceae; g ; s                                            | 0.0011   | 0.1252             | 0.0000           | 0.1252     | 0.0292           |
| 20         | 315430 Root; k Bacteria; p Bacteroidetes; c Bacteroidia; o Bacteroidales; f S24-7; g ; s                                                  | 0.0012   | 0.2591             | 0.0225           | 0.2366     | 0.0563           |
| 21         | 231755 Root; k Bacteria; p Firmicutes; c Bacteroidetes; c Bacteroidia; o Bacteroidales; f Rikenellaceae; g ; s                            | 0.0014   | 0.0018             | 0.3065           | -0.3047    | 0.0735           |
| 22         | 3709990 Root; k Bacteria; p Firmicutes; c Erysipelotrichi; o Erysipelotrichales; f Erysipelotrichaceae; g [Eubacterium]; s dolichum       | 0.0014   | 0.0014             | 0.2365           | -0.2351    | 0.0570           |
| 23         | 261551 Root; k Bacteria; p Firmicutes; c Clostridia; o Clostridiales; f Lachnospiraceae; g ; s                                            | 0.0020   | 0.0743             | 0.0000           | 0.0743     | 0.0189           |
| 24         | 271846 Root; k Bacteria; p Bacteroidetes; c Bacteroidia; o Bacteroidales; f S24-7; g ; s                                                  | 0.0020   | 0.3257             | 0.0064           | 0.3193     | 0.0814           |
| 25         | 131391 Root; k Bacteria; p Actinobacteria; c Actinobacteria; o Bifidobacteriales; f Bifidobacteriaceae; g Bifidobacterium; s pseudolongum | 0.0021   | 0.0040             | 0.0856           | -0.0816    | 0.0210           |
| 26         | 299390 Root; k Bacteria; p Firmicutes; c Clostridia; o Clostridiales; f Lachnospiraceae; g Blautia; s producta                            | 0.0022   | 0.0000             | 0.2641           | -0.2641    | 0.0682           |
| 27         | 533785 Root; k Bacteria; p Actinobacteria; c Actinobacteria; o Bifidobacteriales; f Bifidobacteriaceae; g Bifidobacterium; s              | 0.0023   | 0.0475             | 2.0812           | -2.0337    | 0.5263           |
| 28         | 258910 Root; k Bacteria; p Bacteroidetes; c Bacteroidia; o Bacteroidales; f S24-7; g ; s                                                  | 0.0023   | 0.9708             | 0.0289           | 0.9420     | 0.2451           |
| 29         | 328055 Root; k Bacteria; p Firmicutes; c Clostridia; o ; f ; g ; s                                                                        | 0.0031   | 0.0000             | 0.0443           | -0.0443    | 0.0120           |
| 30         | 351020 Root; k Bacteria; p Firmicutes; c Clostridia; o Clostridiales; f Clostridiaceae; g ; s                                             | 0.0032   | 0.0000             | 0.0580           | -0.0580    | 0.0158           |
| 31         | 1846390 Root; k Bacteria; p Firmicutes; c Clostridia; o Clostridiales; f Lachnospiraceae; g ; s                                           | 0.0038   | 0.0000             | 0.0216           | -0.0216    | 0.0060           |
| 32         | 102480 Root; k Bacteria; p Proteobacteria; c Epsilonproteobacteria; o Campylobacteriales; f Helicobacteraceae; g Helicobacter; s          | 0.0041   | 0.0058             | 0.2741           | -0.2683    | 0.0760           |
| 33         | 341913 Root; k Bacteria; p Bacteroidetes; c Bacteroidia; o Bacteroidales; f S24-7; g ; s                                                  | 0.0045   | 0.4885             | 0.1049           | 0.3837     | 0.1102           |
| 34         | 234273 Root; k Bacteria; p Firmicutes; c Clostridia; o Clostridiales; f Ruminococcaceae; g ; s                                            | 0.0046   | 0.1025             | 0.6469           | -0.5443    | 0.1567           |
| 35         | 349804 Root; k Bacteria; p Firmicutes; c Clostridia; o Clostridiales; f Peptostreptococcaceae; g ; s                                      | 0.0051   | 0.0000             | 0.1339           | -0.1339    | 0.0392           |
| 36         | 174004 Root; k Bacteria; p Bacteroidetes; c Bacteroidia; o Bacteroidales; f S24-7; g ; s                                                  | 0.0051   | 0.2475             | 0.0000           | 0.2475     | 0.0725           |
| 37         | 275974 Root; k Bacteria; p Firmicutes; c Clostridia; o Coriobacteriales; f Coriobacteriaceae; g Adlercreutzia; s                          | 0.0052   | 0.1785             | 0.0000           | 0.1785     | 0.0524           |
| 38         | 183162 Root; k Bacteria; p Firmicutes; c Clostridia; o Clostridiales; f Ruminococcaceae; g Oscillospira; s                                | 0.0061   | 0.0000             | 0.3088           | -0.3088    | 0.0931           |
| 39         | 260518 Root; k Bacteria; p Firmicutes; c Clostridia; o ; f ; g ; s                                                                        | 0.0067   | 0.0000             | 0.0890           | -0.0890    | 0.0272           |
| 40         | 272850 Root; k Bacteria; p Bacteroidetes; c Bacteroidia; o Bacteroidales; f S24-7; g ; s                                                  | 0.0075   | 0.9488             | 0.0000           | 0.9488     | 0.2954           |
| 41         | 187078 Root; k Bacteria; p Bacteroidetes; c Bacteroidia; o Bacteroidales; f S24-7; g ; s                                                  | 0.0075   | 0.0019             | 0.0266           | -0.0247    | 0.0077           |
| 42         | 174056 Root; k Bacteria; p Bacteroidetes; c Bacteroidia; o Bacteroidales; f S24-7; g ; s                                                  | 0.0079   | 0.1701             | 0.0032           | 0.1669     | 0.0524           |
| 43         | 170335 Root; k Bacteria; p Bacteroidetes; c Bacteroidia; o Bacteroidales; f [Odoribacteraceae]; g Odoribacter; s                          | 0.0090   | 0.0915             | 0.0000           | 0.0915     | 0.0294           |
| 44         | 52947 Root; k Bacteria; p Firmicutes; c Clostridia; o Clostridiales; f Clostridiaceae; g Clostridium; s perfringens                       | 0.0109   | 0.0055             | 4.8035           | -4.7979    | 1.5957           |
| 45         | 197043 Root; k Bacteria; p Firmicutes; c Clostridia; o Clostridiales; f Lachnospiraceae; g ; s                                            | 0.0111   | 0.1228             | 0.0000           | 0.1228     | 0.0410           |
| 46         | 181603 Root; k Bacteria; p Firmicutes; c Clostridia; o Clostridiales; f Ruminococcaceae; g Anaerotruncus; s                               | 0.0120   | 0.0018             | 0.5301           | -0.5283    | 0.1788           |
| 47         | 191212 Root; k Bacteria; p Bacteroidetes; c Bacteroidia; o Bacteroidales; f S24-7; g ; s                                                  | 0.0125   | 0.0169             | 0.0000           | 0.0169     | 0.0057           |
| 48         | 315982 Root; k Bacteria; p Firmicutes; c Clostridia; o Clostridiales; f Clostridiaceae; g Clostridium; s perfringens                      | 0.0127   | 0.0000             | 0.4411           | -0.4411    | 0.1507           |
| 49         | 178331 Root; k Bacteria; p Verrucomicrobia; c Verrucomicrobiae; o Verrucomicrobiales; f Verrucomicrobiaceae; g Akkermansia; s muciniphila | 0.0130   | 0.0000             | 0.0060           | -0.0060    | 0.0021           |
| 50         | 312892 Root; k Bacteria; p Firmicutes; c Clostridia; o ; f ; g ; s                                                                        | 0.0130   | 0.0604             | 0.0000           | 0.0604     | 0.0207           |
| 51         | 193202 Root; k Bacteria; p Firmicutes; c Clostridia; o Clostridiales; f Lachnospiraceae; g Blautia; s producta                            | 0.0131   | 0.0000             | 0.0070           | -0.0070    | 0.0024           |
| 52         | 320169 Root; k Bacteria; p Bacteroidetes; c Bacteroidia; o Bacteroidales; f S24-7; g ; s                                                  | 0.0131   | 0.0000             | 0.0070           | -0.0070    | 0.0024           |
| 53         | 323583 Root; k Bacteria; p Firmicutes; c Clostridia; o Clostridiales; f Ruminococcaceae; g Ruminococcus; s                                | 0.0132   | 0.0389             | 0.0000           | 0.0389     | 0.0134           |

|     |         |                                                                                                                                    |        |         |        |         |        |
|-----|---------|------------------------------------------------------------------------------------------------------------------------------------|--------|---------|--------|---------|--------|
| 54  | 210110  | Root; k Bacteria; p Firmicutes; c Clostridia; o Clostridiales; f Lachnospiraceae; g Blautia; s                                     | 0.0136 | 0.0000  | 0.0073 | -0.0073 | 0.0025 |
| 55  | 264023  | Root; k Bacteria; p Bacteroidetes; c Bacteroidia; o Bacteroidales; f S24-7; g ; s                                                  | 0.0137 | 0.0397  | 0.0000 | 0.0397  | 0.0138 |
| 56  | 262541  | Root; k Bacteria; p Firmicutes; c Clostridia; o Clostridiales; f Lachnospiraceae; g ; s                                            | 0.0137 | 0.1680  | 0.0000 | 0.1680  | 0.0582 |
| 57  | 337909  | Root; k Bacteria; p Firmicutes; c Clostridia; o Clostridiales; f ; g ; s                                                           | 0.0144 | 0.0000  | 0.0289 | -0.0289 | 0.0101 |
| 58  | 328955  | Root; k Bacteria; p Firmicutes; c Clostridia; o Clostridiales; f ; g ; s                                                           | 0.0144 | 0.0000  | 0.0096 | -0.0096 | 0.0034 |
| 59  | 194151  | Root; k Bacteria; p Firmicutes; c Clostridia; o Clostridiales; f Peptostreptococcaceae; g ; s                                      | 0.0144 | 0.0000  | 0.0096 | -0.0096 | 0.0034 |
| 60  | 828483  | Root; k Bacteria; p Firmicutes; c Clostridia; o Clostridiales; f Clostridiaceae; g ; s                                             | 0.0144 | 0.0000  | 0.0771 | -0.0771 | 0.0269 |
| 61  | 350832  | Root; k Bacteria; p Firmicutes; c Clostridia; o Clostridiales; f ; g ; s                                                           | 0.0144 | 0.0000  | 0.0385 | -0.0385 | 0.0135 |
| 62  | 105349  | Root; k Bacteria; p Firmicutes; c Clostridia; o Clostridiales; f Ruminococcaceae; g ; s                                            | 0.0149 | 0.1363  | 0.0000 | 0.1363  | 0.0480 |
| 63  | 306288  | Root; k Bacteria; p Firmicutes; c Clostridia; o ; f ; g ; s                                                                        | 0.0152 | 0.0000  | 0.0069 | -0.0069 | 0.0024 |
| 64  | 14202   | Root; k Bacteria; p Firmicutes; c Clostridia; o Clostridiales; f Peptostreptococcaceae; g ; s                                      | 0.0152 | 0.0000  | 0.0069 | -0.0069 | 0.0024 |
| 65  | 185743  | Root; k Bacteria; p Firmicutes; c Clostridia; o Clostridiales; f Lachnospiraceae; g ; s                                            | 0.0152 | 0.0027  | 0.0221 | -0.0193 | 0.0068 |
| 66  | 180869  | Root; k Bacteria; p Firmicutes; c Erysipelotrichi; o Erysipelotrichales; f [Coprobacillaceae]; g ; s                               | 0.0161 | 0.0000  | 0.1101 | -0.1101 | 0.0393 |
| 67  | 2420243 | Root; k Bacteria; p Proteobacteria; c Alphaproteobacteria; o Rickettsiales; f mitochondria; g ; s                                  | 0.0164 | 0.0110  | 0.0423 | -0.0313 | 0.0112 |
| 68  | 332364  | Root; k Bacteria; p Firmicutes; c Bacilli; o Lactobacillales; f Lactobacillaceae; g ; s                                            | 0.0169 | 0.1388  | 0.0286 | 0.1102  | 0.0398 |
| 69  | 277364  | Root; k Bacteria; p Bacteroidetes; c Bacteroidia; o Bacteroidales; f S24-7; g ; s                                                  | 0.0172 | 1.3190  | 0.3800 | 0.9389  | 0.3400 |
| 70  | 3195854 | Root; k Bacteria; p Firmicutes; c Clostridia; o Coriobacteriales; f ; g ; s                                                        | 0.0192 | 0.0000  | 0.0315 | -0.0315 | 0.0116 |
| 71  | 195931  | Root; k Bacteria; p Bacteroidetes; c Bacteroidia; o Bacteroidales; f ; g ; s                                                       | 0.0201 | 0.0014  | 0.0251 | -0.0237 | 0.0088 |
| 72  | 312440  | Root; k Bacteria; p Bacteroidetes; c Bacteroidia; o Bacteroidales; f S24-7; g ; s                                                  | 0.0222 | 0.2076  | 0.0343 | 0.1734  | 0.0661 |
| 73  | 191259  | Root; k Bacteria; p Firmicutes; c Clostridia; o Clostridiales; f Lachnospiraceae; g ; s                                            | 0.0229 | 0.3919  | 0.0000 | 0.3919  | 0.1502 |
| 74  | 264629  | Root; k Bacteria; p Firmicutes; c Clostridia; o Clostridiales; f Lachnospiraceae; g ; s                                            | 0.0236 | 0.0609  | 0.0000 | 0.0609  | 0.0235 |
| 75  | 190026  | Root; k Bacteria; p Bacteroidetes; c Bacteroidia; o Bacteroidales; f Rikenellaceae; g AF12; s                                      | 0.0238 | 0.0000  | 0.0178 | -0.0178 | 0.0069 |
| 76  | 261500  | Root; k Bacteria; p Firmicutes; c Clostridia; o Clostridiales; f Ruminococcaceae; g Oscillospira; s                                | 0.0239 | 0.0330  | 0.0000 | 0.0330  | 0.0128 |
| 77  | 308617  | Root; k Bacteria; p Bacteroidetes; c Bacteroidia; o Bacteroidales; f Rikenellaceae; g ; s                                          | 0.0245 | 0.5957  | 5.5296 | -4.9339 | 1.9190 |
| 78  | 273776  | Root; k Bacteria; p Firmicutes; c Clostridia; o Clostridiales; f Lachnospiraceae; g [Ruminococcus]; s gnavus                       | 0.0262 | 0.0407  | 0.0000 | 0.0407  | 0.0161 |
| 79  | 91169   | Root; k Bacteria; p Proteobacteria; c Gammaproteobacteria; o Pasteurellales; f Pasteurellaceae; g Aggregatibacter; s pneumotropica | 0.0263 | 0.0000  | 0.0276 | -0.0276 | 0.0109 |
| 80  | 185614  | Root; k Bacteria; p Bacteroidetes; c Bacteroidia; o Bacteroidales; f S24-7; g ; s                                                  | 0.0265 | 0.0860  | 0.0000 | 0.0860  | 0.0340 |
| 81  | 464959  | Root; k Bacteria; p Bacteroidetes; c Bacteroidia; o Bacteroidales; f S24-7; g ; s                                                  | 0.0273 | 1.8699  | 0.5543 | 1.3157  | 0.5238 |
| 82  | 190673  | Root; k Bacteria; p Bacteroidetes; c Bacteroidia; o Bacteroidales; f S24-7; g ; s                                                  | 0.0286 | 0.0390  | 0.0000 | 0.0390  | 0.0157 |
| 83  | 363731  | Root; k Bacteria; p Verrucomicrobia; c Verrucomicrobiae; o Verrucomicrobiales; f Verrucomicrobiaceae; g Akkermansia; s muciniphila | 0.0290 | 0.0000  | 0.0116 | -0.0116 | 0.0047 |
| 84  | 264941  | Root; k Bacteria; p Firmicutes; c Clostridia; o Clostridiales; f Ruminococcaceae; g Ruminococcus; s                                | 0.0292 | 0.0304  | 0.0000 | 0.0304  | 0.0123 |
| 85  | 264774  | Root; k Bacteria; p Firmicutes; c Clostridia; o Clostridiales; f Lachnospiraceae; g ; s                                            | 0.0293 | 0.0522  | 0.0000 | 0.0522  | 0.0211 |
| 86  | 263508  | Root; k Bacteria; p Firmicutes; c Clostridia; o Clostridiales; f Lachnospiraceae; g [Ruminococcus]; s                              | 0.0299 | 0.0528  | 0.0038 | 0.0490  | 0.0199 |
| 87  | 166869  | Root; k Bacteria; p Firmicutes; c Clostridia; o ; f ; g ; s                                                                        | 0.0307 | 0.0000  | 0.0311 | -0.0311 | 0.0127 |
| 88  | 417981  | Root; k Bacteria; p Firmicutes; c Clostridia; o Clostridiales; f Clostridiaceae; g ; s                                             | 0.0310 | 0.0515  | 0.0000 | 0.0515  | 0.0211 |
| 89  | 195691  | Root; k Bacteria; p Firmicutes; c Clostridia; o Clostridiales; f Lachnospiraceae; g ; s                                            | 0.0324 | 0.0271  | 0.0000 | 0.0271  | 0.0112 |
| 90  | 261177  | Root; k Bacteria; p Bacteroidetes; c Bacteroidia; o Bacteroidales; f S24-7; g ; s                                                  | 0.0329 | 8.0403  | 2.1484 | 5.8919  | 2.4449 |
| 91  | 209907  | Root; k Bacteria; p Firmicutes; c Clostridia; o Clostridiales; f Lachnospiraceae; g ; s                                            | 0.0330 | 0.6718  | 0.0000 | 0.6718  | 0.2789 |
| 92  | 263500  | Root; k Bacteria; p Firmicutes; c Clostridia; o Clostridiales; f Lachnospiraceae; g ; s                                            | 0.0332 | 0.1463  | 0.0038 | 0.1425  | 0.0593 |
| 93  | 177269  | Root; k Bacteria; p Bacteroidetes; c Bacteroidia; o Bacteroidales; f S24-7; g ; s                                                  | 0.0342 | 0.0246  | 0.0000 | 0.0246  | 0.0103 |
| 94  | 262399  | Root; k Bacteria; p Bacteroidetes; c Bacteroidia; o Bacteroidales; f S24-7; g ; s                                                  | 0.0343 | 0.0299  | 0.0000 | 0.0299  | 0.0125 |
| 95  | 186194  | Root; k Bacteria; p Firmicutes; c Clostridia; o Clostridiales; f Ruminococcaceae; g Ruminococcus; s                                | 0.0343 | 0.0175  | 0.0000 | 0.0175  | 0.0073 |
| 96  | 170502  | Root; k Bacteria; p Proteobacteria; c Deltaproteobacteria; o Desulfovibrionales; f Desulfovibrionaceae; g Desulfovibrio; s C21 c20 | 0.0346 | 3.4197  | 0.0000 | 3.4197  | 1.4348 |
| 97  | 211743  | Root; k Bacteria; p Bacteroidetes; c Bacteroidia; o Bacteroidales; f S24-7; g ; s                                                  | 0.0356 | 0.0078  | 0.0983 | -0.0904 | 0.0382 |
| 98  | 231096  | Root; k Bacteria; p Bacteroidetes; c Bacteroidia; o Bacteroidales; f Rikenellaceae; g ; s                                          | 0.0363 | 0.0352  | 0.0000 | 0.0352  | 0.0149 |
| 99  | 213015  | Root; k Bacteria; p Bacteroidetes; c Bacteroidia; o Bacteroidales; f S24-7; g ; s                                                  | 0.0374 | 0.0265  | 0.2607 | -0.2343 | 0.1001 |
| 100 | 189531  | Root; k Bacteria; p Bacteroidetes; c Bacteroidia; o Bacteroidales; f S24-7; g ; s                                                  | 0.0377 | 0.0666  | 0.0096 | 0.0570  | 0.0244 |
| 101 | 269125  | Root; k Bacteria; p Firmicutes; c Bacilli; o Lactobacillales; f Lactobacillaceae; g ; s                                            | 0.0381 | 14.6186 | 3.7438 | 10.8747 | 4.6670 |
| 102 | 103941  | Root; k Bacteria; p Firmicutes; c Clostridia; o Clostridiales; f Clostridiaceae; g Clostridium; s                                  | 0.0391 | 0.0019  | 0.0655 | -0.0636 | 0.0274 |
| 103 | 193240  | Root; k Bacteria; p Firmicutes; c Clostridia; o Clostridiales; f Ruminococcaceae; g Ruminococcus; s                                | 0.0391 | 0.0000  | 0.0368 | -0.0368 | 0.0159 |
| 104 | 575506  | Root; k Bacteria; p Firmicutes; c Clostridia; o Clostridiales; f Peptostreptococcaceae; g ; s                                      | 0.0391 | 0.0000  | 0.0180 | -0.0180 | 0.0078 |
| 105 | 1142110 | Root; k Bacteria; p Firmicutes; c Clostridia; o Clostridiales; f Peptostreptococcaceae; g ; s                                      | 0.0395 | 0.0000  | 0.3264 | -0.3264 | 0.1413 |
| 106 | 270646  | Root; k Bacteria; p Firmicutes; c Clostridia; o Clostridiales; f Lachnospiraceae; g ; s                                            | 0.0397 | 0.2529  | 0.0000 | 0.2529  | 0.1096 |
| 107 | 197956  | Root; k Bacteria; p Firmicutes; c Clostridia; o Clostridiales; f Lachnospiraceae; g ; s                                            | 0.0409 | 0.0170  | 0.0000 | 0.0170  | 0.0074 |
| 108 | 183832  | Root; k Bacteria; p Firmicutes; c Clostridia; o Coriobacteriales; f ; g ; s                                                        | 0.0418 | 0.1062  | 0.0000 | 0.1062  | 0.0466 |
| 109 | 306914  | Root; k Bacteria; p Firmicutes; c Clostridia; o Clostridiales; f Lachnospiraceae; g ; s                                            | 0.0424 | 0.1558  | 0.0000 | 0.1558  | 0.0686 |

|     |        |                                                                                                                   |        |        |        |         |        |
|-----|--------|-------------------------------------------------------------------------------------------------------------------|--------|--------|--------|---------|--------|
| 110 | 342786 | Root; k_Bacteria; p_Firmicutes; c_Clostridia; o_Clostridiales; f_Lachnospiraceae; g_ ; s_                         | 0.0439 | 0.2279 | 0.0000 | 0.2279  | 0.1012 |
| 111 | 14108  | Root; k_Bacteria; p_Firmicutes; c_Clostridia; o_ ; f_ ; g_ ; s_                                                   | 0.0447 | 0.0153 | 0.5869 | -0.5716 | 0.2551 |
| 112 | 693043 | Root; k_Bacteria; p_Firmicutes; c_Clostridia; o_Clostridiales; f_Ruminococcaceae; g_ ; s_                         | 0.0451 | 0.0464 | 0.0000 | 0.0464  | 0.0207 |
| 113 | 260346 | Root; k_Bacteria; p_Firmicutes; c_Clostridia; o_Clostridiales; f_Lachnospiraceae; g_Coproccoccus; s_              | 0.0468 | 0.1590 | 0.0000 | 0.1590  | 0.0718 |
| 114 | 262938 | Root; k_Bacteria; p_Firmicutes; c_Erysipelotrichi; o_Erysipelotrichales; f_Erysipelotrichaceae; g_Allobaculum; s_ | 0.0472 | 1.4951 | 0.0096 | 1.4855  | 0.6719 |
| 115 | 305880 | Root; k_Bacteria; p_Firmicutes; c_Clostridia; o_Clostridiales; f_Lachnospiraceae; g_ ; s_                         | 0.0478 | 0.1588 | 0.0188 | 0.1400  | 0.0635 |
| 116 | 209028 | Root; k_Bacteria; p_Bacteroidetes; c_Bacteroidia; o_Bacteroidales; f_S24-7; g_ ; s_                               | 0.0485 | 0.0191 | 0.0762 | -0.0571 | 0.0260 |
| 117 | 340517 | Root; k_Bacteria; p_Firmicutes; c_Clostridia; o_Clostridiales; f_Lachnospiraceae; g_ ; s_                         | 0.0488 | 0.0604 | 0.0000 | 0.0604  | 0.0275 |
| 118 | 193672 | Root; k_Bacteria; p_Firmicutes; c_Clostridia; o_Clostridiales; f_Peptostreptococcaceae; g_ ; s_                   | 0.0496 | 0.0014 | 0.0822 | -0.0808 | 0.0370 |



IL10<sup>-/-</sup> water versus IL10<sup>-/-</sup> P80

| Prok_MSA # | Taxonomy | P value                                                                                                                     | Mean water-treated | Mean P80-treated | Difference | SE of difference |        |
|------------|----------|-----------------------------------------------------------------------------------------------------------------------------|--------------------|------------------|------------|------------------|--------|
| 1          | 181719   | Root; k Bacteria; p Bacteroidetes; c Bacteroidia; o Bacteroidales; f Bacteroidaceae; g Bacteroides; s                       | < 0.0001           | 0.0176           | 18.1772    | -18.1596         | 1.6702 |
| 2          | 180731   | Root; k Bacteria; p Bacteroidetes; c Bacteroidia; o Bacteroidales; f Porphyromonadaceae; g Parabacteroides; s               | < 0.0001           | 0.0014           | 3.3249     | -3.3235          | 0.5590 |
| 3          | 188889   | Root; k Bacteria; p Bacteroidetes; c Bacteroidia; o Bacteroidales; f Prevotellaceae; g Prevotella; s                        | < 0.0001           | 0.0014           | 1.8172     | -1.8158          | 0.2413 |
| 4          | 431900   | Root; k Bacteria; p Bacteroidetes; c Bacteroidia; o Bacteroidales; f S24-7; g ; s                                           | < 0.0001           | 1.5851           | 0.3220     | 1.2632           | 0.2014 |
| 5          | 215317   | Root; k Bacteria; p Firmicutes; c Clostridia; o Clostridiales; f Lachnospiraceae; g ; s                                     | < 0.0001           | 0.0000           | 1.2048     | -1.2048          | 0.1919 |
| 6          | 273707   | Root; k Bacteria; p Firmicutes; c Clostridia; o Clostridiales; f Ruminococcaceae; g Ruminococcus; s                         | 0.0001             | 0.0000           | 0.0156     | -0.0156          | 0.0028 |
| 7          | 260529   | Root; k Bacteria; p Firmicutes; c Clostridia; o Clostridiales; f Lachnospiraceae; g ; s                                     | 0.0002             | 0.0000           | 0.2451     | -0.2451          | 0.0484 |
| 8          | 232037   | Root; k Bacteria; p Firmicutes; c Clostridia; o ; f ; g ; s                                                                 | 0.0002             | 0.0041           | 0.1913     | -0.1872          | 0.0372 |
| 9          | 194225   | Root; k Bacteria; p Bacteroidetes; c Bacteroidia; o Bacteroidales; f S24-7; g ; s                                           | 0.0002             | 0.5578           | 0.0294     | 0.5284           | 0.1056 |
| 10         | 170185   | Root; k Bacteria; p Firmicutes; c Clostridia; o Clostridiales; f Ruminococcaceae; g ; s                                     | 0.0003             | 0.0000           | 0.0180     | -0.0180          | 0.0037 |
| 11         | 273084   | Root; k Bacteria; p Firmicutes; c Clostridia; o Clostridiales; f Ruminococcaceae; g Ruminococcus; s                         | 0.0005             | 0.0075           | 0.3629     | -0.3554          | 0.0767 |
| 12         | 276837   | Root; k Bacteria; p Firmicutes; c Clostridia; o Clostridiales; f Lachnospiraceae; g ; s                                     | 0.0006             | 0.0000           | 0.0307     | -0.0307          | 0.0068 |
| 13         | 271846   | Root; k Bacteria; p Bacteroidetes; c Bacteroidia; o Bacteroidales; f S24-7; g ; s                                           | 0.0006             | 0.3257           | 0.0025     | 0.3232           | 0.0724 |
| 14         | 261551   | Root; k Bacteria; p Firmicutes; c Clostridia; o Clostridiales; f Lachnospiraceae; g ; s                                     | 0.0007             | 0.0743           | 0.0000     | 0.0743           | 0.0168 |
| 15         | 234939   | Root; k Bacteria; p Proteobacteria; c Deltaproteobacteria; o Desulfobrivionales; f Desulfobrivionaceae; g Bilophila; s      | 0.0007             | 0.0084           | 0.1043     | -0.0959          | 0.0219 |
| 16         | 1110008  | Root; k Bacteria; p Firmicutes; c Clostridia; o Clostridiales; f Ruminococcaceae; g Ruminococcus; s                         | 0.0008             | 0.0158           | 0.1528     | -0.1371          | 0.0314 |
| 17         | 277364   | Root; k Bacteria; p Bacteroidetes; c Bacteroidia; o Bacteroidales; f S24-7; g ; s                                           | 0.0008             | 1.3190           | 0.0466     | 1.2724           | 0.2919 |
| 18         | 175646   | Root; k Bacteria; p Bacteroidetes; c Bacteroidia; o Bacteroidales; f S24-7; g ; s                                           | 0.0008             | 0.0354           | 0.0000     | 0.0354           | 0.0082 |
| 19         | 181603   | Root; k Bacteria; p Firmicutes; c Clostridia; o Clostridiales; f Ruminococcaceae; g Anaerotruncus; s                        | 0.0010             | 0.0018           | 0.0856     | -0.0838          | 0.0198 |
| 20         | 193756   | Root; k Bacteria; p Firmicutes; c Clostridia; o Clostridiales; f Lachnospiraceae; g ; s                                     | 0.0015             | 0.0055           | 0.3441     | -0.3387          | 0.0844 |
| 21         | 258283   | Root; k Bacteria; p Firmicutes; c Clostridia; o Clostridiales; f Lachnospiraceae; g ; s                                     | 0.0020             | 0.0000           | 0.0219     | -0.0219          | 0.0057 |
| 22         | 269645   | Root; k Bacteria; p Firmicutes; c Clostridia; o Clostridiales; f Ruminococcaceae; g Ruminococcus; s                         | 0.0020             | 0.0074           | 0.1307     | -0.1233          | 0.0321 |
| 23         | 261177   | Root; k Bacteria; p Bacteroidetes; c Bacteroidia; o Bacteroidales; f S24-7; g ; s                                           | 0.0027             | 8.0403           | 0.2981     | 7.7422           | 2.0963 |
| 24         | 274297   | Root; k Bacteria; p Firmicutes; c Clostridia; o Clostridiales; f Ruminococcaceae; g Ruminococcus; s                         | 0.0028             | 0.0143           | 0.1117     | -0.0975          | 0.0266 |
| 25         | 264941   | Root; k Bacteria; p Firmicutes; c Clostridia; o Clostridiales; f Ruminococcaceae; g Ruminococcus; s                         | 0.0028             | 0.0304           | 0.1302     | -0.0998          | 0.0272 |
| 26         | 191445   | Root; k Bacteria; p Firmicutes; c Clostridia; o Clostridiales; f Ruminococcaceae; g Oscillospira; s                         | 0.0034             | 0.0000           | 0.0552     | -0.0552          | 0.0154 |
| 27         | 351309   | Root; k Bacteria; p Firmicutes; c Clostridia; o Clostridiales; f Lachnospiraceae; g ; s                                     | 0.0034             | 0.0439           | 0.8094     | -0.7656          | 0.2143 |
| 28         | 258910   | Root; k Bacteria; p Bacteroidetes; c Bacteroidia; o Bacteroidales; f S24-7; g ; s                                           | 0.0035             | 0.9708           | 0.1787     | 0.7921           | 0.2224 |
| 29         | 348350   | Root; k Bacteria; p Bacteroidetes; c Bacteroidia; o Bacteroidales; f S24-7; g ; s                                           | 0.0035             | 0.2397           | 0.0034     | 0.2363           | 0.0665 |
| 30         | 180065   | Root; k Bacteria; p Firmicutes; c Clostridia; o Clostridiales; f Lachnospiraceae; g ; s                                     | 0.0037             | 0.0021           | 0.1038     | -0.1017          | 0.0288 |
| 31         | 170335   | Root; k Bacteria; p Bacteroidetes; c Bacteroidia; o Bacteroidales; f [Odoribacteraceae]; g Odoribacter; s                   | 0.0039             | 0.0915           | 0.0000     | 0.0915           | 0.0262 |
| 32         | 3709990  | Root; k Bacteria; p Firmicutes; c Erysipelotrichi; o Erysipelotrichales; f Erysipelotrichaceae; g [Eubacterium]; s dolichum | 0.0039             | 0.0014           | 0.0214     | -0.0200          | 0.0057 |
| 33         | 272850   | Root; k Bacteria; p Bacteroidetes; c Bacteroidia; o Bacteroidales; f S24-7; g ; s                                           | 0.0040             | 0.9488           | 0.0314     | 0.9174           | 0.2631 |
| 34         | 310479   | Root; k Bacteria; p Firmicutes; c Clostridia; o Clostridiales; f Lachnospiraceae; g ; s                                     | 0.0043             | 0.0000           | 0.0240     | -0.0240          | 0.0069 |
| 35         | 262375   | Root; k Bacteria; p Firmicutes; c Erysipelotrichi; o Erysipelotrichales; f Erysipelotrichaceae; g ; s                       | 0.0047             | 0.0040           | 0.0473     | -0.0433          | 0.0127 |
| 36         | 353026   | Root; k Bacteria; p Firmicutes; c Clostridia; o Clostridiales; f Lachnospiraceae; g ; s                                     | 0.0048             | 0.1148           | 3.6329     | -3.5181          | 1.0379 |
| 37         | 332364   | Root; k Bacteria; p Firmicutes; c Bacilli; o Lactobacillales; f Lactobacillaceae; g ; s                                     | 0.0049             | 0.1388           | 0.0161     | 0.1227           | 0.0363 |
| 38         | 193859   | Root; k Bacteria; p Bacteroidetes; c Bacteroidia; o Bacteroidales; f Bacteroidaceae; g Bacteroides; s                       | 0.0051             | 0.0000           | 0.0144     | -0.0144          | 0.0043 |
| 39         | 183089   | Root; k Bacteria; p Firmicutes; c Clostridia; o Clostridiales; f ; g ; s                                                    | 0.0051             | 0.0029           | 0.1486     | -0.1457          | 0.0434 |
| 40         | 331737   | Root; k Bacteria; p Firmicutes; c Clostridia; o Clostridiales; f Ruminococcaceae; g Ruminococcus; s                         | 0.0054             | 0.0042           | 0.1014     | -0.0972          | 0.0291 |
| 41         | 464959   | Root; k Bacteria; p Bacteroidetes; c Bacteroidia; o Bacteroidales; f S24-7; g ; s                                           | 0.0060             | 1.8699           | 0.3372     | 1.5327           | 0.4672 |
| 42         | 264023   | Root; k Bacteria; p Bacteroidetes; c Bacteroidia; o Bacteroidales; f S24-7; g ; s                                           | 0.0064             | 0.0397           | 0.0000     | 0.0397           | 0.0122 |
| 43         | 323829   | Root; k Bacteria; p Firmicutes; c Clostridia; o Clostridiales; f Lachnospiraceae; g ; s                                     | 0.0064             | 0.1004           | 1.0185     | -0.9181          | 0.2830 |
| 44         | 315430   | Root; k Bacteria; p Bacteroidetes; c Bacteroidia; o Bacteroidales; f S24-7; g ; s                                           | 0.0065             | 0.2591           | 0.0776     | 0.1815           | 0.0561 |
| 45         | 463794   | Root; k Bacteria; p Firmicutes; c Bacilli; o Lactobacillales; f Lactobacillaceae; g ; s                                     | 0.0072             | 0.2750           | 0.0364     | 0.2386           | 0.0749 |
| 46         | 267024   | Root; k Bacteria; p Firmicutes; c Clostridia; o Clostridiales; f Lachnospiraceae; g ; s                                     | 0.0072             | 0.0608           | 1.9126     | -1.8518          | 0.5822 |
| 47         | 244692   | Root; k Bacteria; p Firmicutes; c Clostridia; o Clostridiales; f Ruminococcaceae; g Ruminococcus; s                         | 0.0079             | 0.0286           | 0.8760     | -0.8474          | 0.2703 |
| 48         | 102480   | Root; k Bacteria; p Proteobacteria; c Epsilonproteobacteria; o Campylobacteriales; f Helicobacteraceae; g Helicobacter; s   | 0.0083             | 0.0058           | 1.5754     | -1.5696          | 0.5048 |
| 49         | 272080   | Root; k Bacteria; p Firmicutes; c Clostridia; o Clostridiales; f Lachnospiraceae; g ; s                                     | 0.0083             | 0.0000           | 0.1024     | -0.1024          | 0.0329 |
| 50         | 187028   | Root; k Bacteria; p Bacteroidetes; c Bacteroidia; o Bacteroidales; f S24-7; g ; s                                           | 0.0084             | 0.0912           | 0.0000     | 0.0912           | 0.0294 |
| 51         | 341913   | Root; k Bacteria; p Bacteroidetes; c Bacteroidia; o Bacteroidales; f S24-7; g ; s                                           | 0.0085             | 0.4885           | 0.1606     | 0.3279           | 0.1060 |
| 52         | 269037   | Root; k Bacteria; p Firmicutes; c Clostridia; o Clostridiales; f Lachnospiraceae; g ; s                                     | 0.0088             | 0.0000           | 0.0280     | -0.0280          | 0.0091 |
| 53         | 275974   | Root; k Bacteria; p Firmicutes; c Clostridia; o Coriobacteriales; f Coriobacteriaceae; g Adlercreutzia; s                   | 0.0094             | 0.1785           | 0.0281     | 0.1504           | 0.0494 |

|     |         |                                                                                                                                    |        |         |        |         |        |
|-----|---------|------------------------------------------------------------------------------------------------------------------------------------|--------|---------|--------|---------|--------|
| 54  | 207284  | Root; k Bacteria; p Bacteroidetes; c Bacteroidia; o Bacteroidales; f S24-7; g ; s                                                  | 0.0101 | 0.0743  | 0.0113 | 0.0630  | 0.0209 |
| 55  | 189531  | Root; k Bacteria; p Bacteroidetes; c Bacteroidia; o Bacteroidales; f S24-7; g ; s                                                  | 0.0102 | 0.0666  | 0.0019 | 0.0647  | 0.0215 |
| 56  | 269125  | Root; k Bacteria; p Firmicutes; c Bacilli; o Lactobacillales; f Lactobacillaceae; g ; s                                            | 0.0107 | 14.6186 | 2.1484 | 12.4701 | 4.1909 |
| 57  | 442151  | Root; k Bacteria; p Bacteroidetes; c Bacteroidia; o Bacteroidales; f S24-7; g ; s                                                  | 0.0108 | 0.0095  | 0.0649 | -0.0554 | 0.0186 |
| 58  | 265669  | Root; k Bacteria; p Firmicutes; c Clostridia; o Clostridiales; f Ruminococcaceae; g Ruminococcus; s                                | 0.0109 | 0.0632  | 0.3731 | -0.3098 | 0.1044 |
| 59  | 176357  | Root; k Bacteria; p Firmicutes; c Clostridia; o ; f ; g ; s                                                                        | 0.0115 | 0.0069  | 0.1265 | -0.1196 | 0.0407 |
| 60  | 339329  | Root; k Bacteria; p Firmicutes; c Clostridia; o Clostridiales; f Lachnospiraceae; g ; s                                            | 0.0116 | 0.0055  | 0.1836 | -0.1781 | 0.0607 |
| 61  | 267783  | Root; k Bacteria; p Firmicutes; c Clostridia; o Clostridiales; f Lachnospiraceae; g ; s                                            | 0.0119 | 0.0000  | 0.0249 | -0.0249 | 0.0085 |
| 62  | 318343  | Root; k Bacteria; p Firmicutes; c Clostridia; o Clostridiales; f Lachnospiraceae; g ; s                                            | 0.0119 | 0.0000  | 0.0126 | -0.0126 | 0.0043 |
| 63  | 174056  | Root; k Bacteria; p Bacteroidetes; c Bacteroidia; o Bacteroidales; f S24-7; g ; s                                                  | 0.0120 | 0.1701  | 0.0313 | 0.1388  | 0.0476 |
| 64  | 191259  | Root; k Bacteria; p Firmicutes; c Clostridia; o Clostridiales; f Lachnospiraceae; g ; s                                            | 0.0121 | 0.3919  | 0.0025 | 0.3894  | 0.1336 |
| 65  | 336193  | Root; k Bacteria; p Proteobacteria; c Betaproteobacteria; o Burkholderiales; f Alcaligenaceae; g Sutterella; s                     | 0.0124 | 0.1154  | 0.0000 | 0.1154  | 0.0397 |
| 66  | 192598  | Root; k Bacteria; p Firmicutes; c Clostridia; o Clostridiales; f Ruminococcaceae; g Ruminococcus; s                                | 0.0124 | 0.0000  | 0.0253 | -0.0253 | 0.0087 |
| 67  | 196578  | Root; k Bacteria; p Bacteroidetes; c Bacteroidia; o Bacteroidales; f S24-7; g ; s                                                  | 0.0124 | 0.0140  | 0.2597 | -0.2457 | 0.0847 |
| 68  | 312892  | Root; k Bacteria; p Firmicutes; c Clostridia; o ; f ; g ; s                                                                        | 0.0132 | 0.0604  | 0.0061 | 0.0542  | 0.0189 |
| 69  | 308076  | Root; k Bacteria; p Bacteroidetes; c Bacteroidia; o Bacteroidales; f S24-7; g ; s                                                  | 0.0139 | 1.9941  | 6.3120 | -4.3178 | 1.5203 |
| 70  | 317633  | Root; k Bacteria; p Firmicutes; c Clostridia; o Clostridiales; f Ruminococcaceae; g Oscillospira; s                                | 0.0141 | 0.0020  | 0.0709 | -0.0689 | 0.0243 |
| 71  | 292091  | Root; k Bacteria; p Firmicutes; c Clostridia; o Clostridiales; f Lachnospiraceae; g ; s                                            | 0.0144 | 0.0000  | 0.1077 | -0.1077 | 0.0382 |
| 72  | 337099  | Root; k Bacteria; p Firmicutes; c Clostridia; o Clostridiales; f Lachnospiraceae; g ; s                                            | 0.0146 | 0.0126  | 0.1739 | -0.1614 | 0.0573 |
| 73  | 187959  | Root; k Bacteria; p Bacteroidetes; c Bacteroidia; o Bacteroidales; f S24-7; g ; s                                                  | 0.0151 | 0.1081  | 0.0033 | 0.1049  | 0.0375 |
| 74  | 308617  | Root; k Bacteria; p Bacteroidetes; c Bacteroidia; o Bacteroidales; f Rikenellaceae; g ; s                                          | 0.0151 | 0.5957  | 2.6570 | -2.0613 | 0.7371 |
| 75  | 189585  | Root; k Bacteria; p Firmicutes; c Clostridia; o Clostridiales; f Lachnospiraceae; g ; s                                            | 0.0160 | 0.0000  | 0.0554 | -0.0554 | 0.0200 |
| 76  | 258453  | Root; k Bacteria; p Firmicutes; c Clostridia; o Clostridiales; f Lachnospiraceae; g ; s                                            | 0.0161 | 0.0035  | 0.0777 | -0.0742 | 0.0269 |
| 77  | 269532  | Root; k Bacteria; p Firmicutes; c Clostridia; o Clostridiales; f Ruminococcaceae; g Ruminococcus; s                                | 0.0162 | 0.0043  | 0.0625 | -0.0582 | 0.0211 |
| 78  | 422931  | Root; k Bacteria; p Firmicutes; c Bacilli; o Lactobacillales; f Lactobacillaceae; g ; s                                            | 0.0165 | 0.0193  | 0.3721 | -0.3529 | 0.1283 |
| 79  | 258700  | Root; k Bacteria; p Firmicutes; c Clostridia; o Clostridiales; f Ruminococcaceae; g Oscillospira; s                                | 0.0167 | 0.0057  | 0.0376 | -0.0319 | 0.0116 |
| 80  | 264696  | Root; k Bacteria; p Verrucomicrobia; c Verrucomicrobiae; o Verrucomicrobiales; f Verrucomicrobiaceae; g Akkermansia; s muciniphila | 0.0175 | 0.7131  | 8.2637 | -7.5506 | 2.7754 |
| 81  | 209907  | Root; k Bacteria; p Firmicutes; c Clostridia; o Clostridiales; f Lachnospiraceae; g ; s                                            | 0.0179 | 0.6718  | 0.0000 | 0.6718  | 0.2481 |
| 82  | 263546  | Root; k Bacteria; p Firmicutes; c Clostridia; o Clostridiales; f Ruminococcaceae; g Ruminococcus; s                                | 0.0182 | 0.1324  | 0.7111 | -0.5787 | 0.2143 |
| 83  | 1684219 | Root; k Bacteria; p Firmicutes; c Clostridia; o Clostridiales; f Lachnospiraceae; g ; s                                            | 0.0183 | 0.0000  | 0.0447 | -0.0447 | 0.0166 |
| 84  | 177269  | Root; k Bacteria; p Bacteroidetes; c Bacteroidia; o Bacteroidales; f S24-7; g ; s                                                  | 0.0187 | 0.0246  | 0.0000 | 0.0246  | 0.0092 |
| 85  | 262399  | Root; k Bacteria; p Bacteroidetes; c Bacteroidia; o Bacteroidales; f S24-7; g ; s                                                  | 0.0187 | 0.0299  | 0.0000 | 0.0299  | 0.0111 |
| 86  | 174438  | Root; k Bacteria; p Bacteroidetes; c Bacteroidia; o Bacteroidales; f S24-7; g ; s                                                  | 0.0188 | 0.0310  | 0.0000 | 0.0310  | 0.0115 |
| 87  | 258598  | Root; k Bacteria; p Firmicutes; c Clostridia; o Clostridiales; f Ruminococcaceae; g Ruminococcus; s                                | 0.0188 | 0.0000  | 0.0932 | -0.0932 | 0.0348 |
| 88  | 185614  | Root; k Bacteria; p Bacteroidetes; c Bacteroidia; o Bacteroidales; f S24-7; g ; s                                                  | 0.0200 | 0.0860  | 0.0056 | 0.0804  | 0.0304 |
| 89  | 308351  | Root; k Bacteria; p Firmicutes; c Clostridia; o Clostridiales; f Lachnospiraceae; g ; s                                            | 0.0203 | 0.0060  | 0.0469 | -0.0409 | 0.0155 |
| 90  | 191814  | Root; k Bacteria; p Firmicutes; c Clostridia; o Clostridiales; f Lachnospiraceae; g ; s                                            | 0.0221 | 0.0682  | 0.4894 | -0.4212 | 0.1621 |
| 91  | 270646  | Root; k Bacteria; p Firmicutes; c Clostridia; o Clostridiales; f Lachnospiraceae; g ; s                                            | 0.0223 | 0.2529  | 0.0000 | 0.2529  | 0.0975 |
| 92  | 264629  | Root; k Bacteria; p Firmicutes; c Clostridia; o Clostridiales; f Lachnospiraceae; g ; s                                            | 0.0234 | 0.0609  | 0.0061 | 0.0548  | 0.0213 |
| 93  | 269070  | Root; k Bacteria; p Firmicutes; c Clostridia; o Clostridiales; f Ruminococcaceae; g ; s                                            | 0.0252 | 0.0174  | 0.0727 | -0.0553 | 0.0219 |
| 94  | 318571  | Root; k Bacteria; p Bacteroidetes; c Bacteroidia; o Bacteroidales; f S24-7; g ; s                                                  | 0.0264 | 0.1155  | 0.0084 | 0.1070  | 0.0428 |
| 95  | 289627  | Root; k Bacteria; p Firmicutes; c Bacilli; o Lactobacillales; f Lactobacillaceae; g ; s                                            | 0.0265 | 0.0211  | 0.0000 | 0.0211  | 0.0084 |
| 96  | 262938  | Root; k Bacteria; p Firmicutes; c Erysipelotrichi; o Erysipelotrichales; f Erysipelotrichaceae; g Allobaculum; s                   | 0.0271 | 1.4951  | 0.0069 | 1.4882  | 0.5977 |
| 97  | 306914  | Root; k Bacteria; p Firmicutes; c Clostridia; o Clostridiales; f Lachnospiraceae; g ; s                                            | 0.0287 | 0.1558  | 0.0056 | 0.1502  | 0.0611 |
| 98  | 263687  | Root; k Bacteria; p Firmicutes; c Clostridia; o Clostridiales; f Lachnospiraceae; g ; s                                            | 0.0294 | 0.0155  | 0.0819 | -0.0664 | 0.0271 |
| 99  | 185743  | Root; k Bacteria; p Firmicutes; c Clostridia; o Clostridiales; f Lachnospiraceae; g ; s                                            | 0.0301 | 0.0027  | 0.0429 | -0.0401 | 0.0165 |
| 100 | 350256  | Root; k Bacteria; p Firmicutes; c Clostridia; o Clostridiales; f Ruminococcaceae; g Ruminococcus; s                                | 0.0317 | 0.0124  | 0.0803 | -0.0680 | 0.0282 |
| 101 | 319702  | Root; k Bacteria; p Firmicutes; c Clostridia; o Clostridiales; f Lachnospiraceae; g ; s                                            | 0.0319 | 0.0000  | 0.0195 | -0.0195 | 0.0081 |
| 102 | 2045    | Root; k Bacteria; p Bacteroidetes; c Bacteroidia; o Bacteroidales; f Bacteroidaceae; g Bacteroides; s                              | 0.0320 | 0.0000  | 0.0067 | -0.0067 | 0.0028 |
| 103 | 198560  | Root; k Bacteria; p Proteobacteria; c Deltaproteobacteria; o Desulfobivriales; f Desulfobivriaceae; g Bilophila; s                 | 0.0320 | 0.0000  | 0.0067 | -0.0067 | 0.0028 |
| 104 | 261887  | Root; k Bacteria; p Firmicutes; c Clostridia; o Coriobacteriales; f ; g ; s                                                        | 0.0320 | 0.0000  | 0.0067 | -0.0067 | 0.0028 |
| 105 | 133843  | Root; k Bacteria; p Firmicutes; c Clostridia; o Clostridiales; f Lachnospiraceae; g ; s                                            | 0.0320 | 0.0000  | 0.0134 | -0.0134 | 0.0056 |
| 106 | 312440  | Root; k Bacteria; p Bacteroidetes; c Bacteroidia; o Bacteroidales; f S24-7; g ; s                                                  | 0.0320 | 0.2076  | 0.0614 | 0.1462  | 0.0609 |
| 107 | 262102  | Root; k Bacteria; p Bacteroidetes; c Bacteroidia; o Bacteroidales; f S24-7; g ; s                                                  | 0.0320 | 0.0000  | 0.0063 | -0.0063 | 0.0026 |
| 108 | 319379  | Root; k Bacteria; p Bacteroidetes; c Bacteroidia; o Bacteroidales; f S24-7; g ; s                                                  | 0.0320 | 0.0000  | 0.0191 | -0.0191 | 0.0080 |
| 109 | 190913  | Root; k Bacteria; p Bacteroidetes; c Bacteroidia; o Bacteroidales; f Bacteroidaceae; g Bacteroides; s                              | 0.0320 | 0.0000  | 0.0143 | -0.0143 | 0.0060 |

|     |         |                                                                                                                                    |        |        |        |         |        |
|-----|---------|------------------------------------------------------------------------------------------------------------------------------------|--------|--------|--------|---------|--------|
| 110 | 227967  | Root; k Bacteria; p Firmicutes; c Clostridia; o Clostridiales; f ; g ; s                                                           | 0.0323 | 0.0000 | 0.0065 | -0.0065 | 0.0027 |
| 111 | 189406  | Root; k Bacteria; p Firmicutes; c Clostridia; o Clostridiales; f Ruminococcaceae; g Oscillospira; s                                | 0.0323 | 0.0000 | 0.0065 | -0.0065 | 0.0027 |
| 112 | 258899  | Root; k Bacteria; p Firmicutes; c Clostridia; o Clostridiales; f Ruminococcaceae; g Ruminococcus; s                                | 0.0324 | 0.0000 | 0.0140 | -0.0140 | 0.0058 |
| 113 | 266935  | Root; k Bacteria; p Firmicutes; c Clostridia; o Coriobacteriales; f ; g ; s                                                        | 0.0328 | 0.0000 | 0.0071 | -0.0071 | 0.0030 |
| 114 | 170502  | Root; k Bacteria; p Proteobacteria; c Deltaproteobacteria; o Desulfovibrionales; f Desulfovibrionaceae; g Desulfovibrio; s C21_c20 | 0.0329 | 3.4197 | 0.3690 | 3.0507  | 1.2785 |
| 115 | 184154  | Root; k Bacteria; p Firmicutes; c Clostridia; o Clostridiales; f Ruminococcaceae; g ; s                                            | 0.0332 | 0.0496 | 0.0000 | 0.0496  | 0.0208 |
| 116 | 263508  | Root; k Bacteria; p Firmicutes; c Clostridia; o Clostridiales; f Lachnospiraceae; g [Ruminococcus]; s                              | 0.0335 | 0.0528 | 0.2640 | -0.2113 | 0.0889 |
| 117 | 178331  | Root; k Bacteria; p Verrucomicrobia; c Verrucomicrobiae; o Verrucomicrobiales; f Verrucomicrobiaceae; g Akkermansia; s muciniphila | 0.0335 | 0.0000 | 0.0070 | -0.0070 | 0.0029 |
| 118 | 344256  | Root; k Bacteria; p Firmicutes; c Clostridia; o Clostridiales; f Lachnospiraceae; g ; s                                            | 0.0339 | 0.0218 | 0.0892 | -0.0674 | 0.0284 |
| 119 | 166869  | Root; k Bacteria; p Firmicutes; c Clostridia; o ; f ; g ; s                                                                        | 0.0341 | 0.0000 | 0.0057 | -0.0057 | 0.0024 |
| 120 | 264844  | Root; k Bacteria; p Firmicutes; c Clostridia; o Clostridiales; f Lachnospiraceae; g ; s                                            | 0.0341 | 0.0000 | 0.0057 | -0.0057 | 0.0024 |
| 121 | 324595  | Root; k Bacteria; p Firmicutes; c Clostridia; o Clostridiales; f Lachnospiraceae; g ; s                                            | 0.0341 | 0.0000 | 0.0057 | -0.0057 | 0.0024 |
| 122 | 176977  | Root; k Bacteria; p Firmicutes; c Clostridia; o Clostridiales; f Lachnospiraceae; g ; s                                            | 0.0343 | 0.0574 | 0.8188 | -0.7614 | 0.3220 |
| 123 | 196746  | Root; k Bacteria; p Firmicutes; c Clostridia; o Clostridiales; f Ruminococcaceae; g ; s                                            | 0.0343 | 0.0264 | 0.0000 | 0.0264  | 0.0112 |
| 124 | 228785  | Root; k Bacteria; p Firmicutes; c Clostridia; o Clostridiales; f Dehalobacteriaceae; g Dehalobacterium; s                          | 0.0349 | 0.0177 | 0.0000 | 0.0177  | 0.0075 |
| 125 | 335632  | Root; k Bacteria; p Firmicutes; c Clostridia; o Clostridiales; f Lachnospiraceae; g ; s                                            | 0.0350 | 0.0000 | 0.0526 | -0.0526 | 0.0224 |
| 126 | 275423  | Root; k Bacteria; p Firmicutes; c Clostridia; o Clostridiales; f Ruminococcaceae; g Oscillospira; s                                | 0.0351 | 0.0000 | 0.0119 | -0.0119 | 0.0050 |
| 127 | 172622  | Root; k Bacteria; p Firmicutes; c Clostridia; o ; f ; g ; s                                                                        | 0.0355 | 0.0143 | 0.0941 | -0.0798 | 0.0340 |
| 128 | 259667  | Root; k Bacteria; p Firmicutes; c Clostridia; o Coriobacteriales; f ; g ; s                                                        | 0.0364 | 0.0252 | 0.1199 | -0.0947 | 0.0406 |
| 129 | 277202  | Root; k Bacteria; p Firmicutes; c Clostridia; o Clostridiales; f ; g ; s                                                           | 0.0367 | 0.0158 | 0.0000 | 0.0158  | 0.0068 |
| 130 | 272949  | Root; k Bacteria; p Firmicutes; c Clostridia; o Clostridiales; f Lachnospiraceae; g ; s                                            | 0.0379 | 0.0035 | 0.0326 | -0.0292 | 0.0126 |
| 131 | 313724  | Root; k Bacteria; p Firmicutes; c Clostridia; o Clostridiales; f Lachnospiraceae; g ; s                                            | 0.0381 | 0.0000 | 0.0050 | -0.0050 | 0.0022 |
| 132 | 264774  | Root; k Bacteria; p Firmicutes; c Clostridia; o Clostridiales; f Lachnospiraceae; g ; s                                            | 0.0384 | 0.0522 | 0.0074 | 0.0448  | 0.0194 |
| 133 | 191811  | Root; k Bacteria; p Firmicutes; c Clostridia; o Clostridiales; f Lachnospiraceae; g ; s                                            | 0.0387 | 0.0029 | 0.0297 | -0.0269 | 0.0117 |
| 134 | 177414  | Root; k Bacteria; p Bacteroidetes; c Bacteroidia; o Bacteroidales; f S24-7; g ; s                                                  | 0.0392 | 0.0549 | 0.0074 | 0.0474  | 0.0207 |
| 135 | 261500  | Root; k Bacteria; p Firmicutes; c Clostridia; o Clostridiales; f Ruminococcaceae; g Oscillospira; s                                | 0.0396 | 0.0330 | 0.0900 | -0.0570 | 0.0249 |
| 136 | 231318  | Root; k Bacteria; p Firmicutes; c Clostridia; o Clostridiales; f Lachnospiraceae; g ; s                                            | 0.0408 | 0.0340 | 0.2721 | -0.2381 | 0.1048 |
| 137 | 262541  | Root; k Bacteria; p Firmicutes; c Clostridia; o Clostridiales; f Lachnospiraceae; g ; s                                            | 0.0431 | 0.1680 | 0.0464 | 0.1216  | 0.0543 |
| 138 | 269815  | Root; k Bacteria; p Firmicutes; c Clostridia; o Clostridiales; f Lachnospiraceae; g ; s                                            | 0.0438 | 0.0000 | 0.0100 | -0.0100 | 0.0045 |
| 139 | 185177  | Root; k Bacteria; p Firmicutes; c Clostridia; o Clostridiales; f Lachnospiraceae; g ; s                                            | 0.0451 | 0.0050 | 0.0529 | -0.0479 | 0.0216 |
| 140 | 2420243 | Root; k Bacteria; p Proteobacteria; c Alphaproteobacteria; o Rickettsiales; f mitochondria; g ; s                                  | 0.0453 | 0.0110 | 0.0460 | -0.0350 | 0.0158 |
| 141 | 179575  | Root; k Bacteria; p Firmicutes; c Clostridia; o ; f ; g ; s                                                                        | 0.0453 | 0.1319 | 0.0034 | 0.1284  | 0.0580 |
| 142 | 3172943 | Root; k Bacteria; p Bacteroidetes; c Bacteroidia; o Bacteroidales; f S24-7; g ; s                                                  | 0.0454 | 0.1041 | 0.0056 | 0.0986  | 0.0446 |
| 143 | 305880  | Root; k Bacteria; p Firmicutes; c Clostridia; o Clostridiales; f Lachnospiraceae; g ; s                                            | 0.0463 | 0.1588 | 0.0345 | 0.1243  | 0.0565 |
| 144 | 335330  | Root; k Bacteria; p Firmicutes; c Clostridia; o Clostridiales; f Ruminococcaceae; g Oscillospira; s                                | 0.0473 | 0.0096 | 0.1283 | -0.1187 | 0.0542 |
| 145 | 128227  | Root; k Bacteria; p Firmicutes; c Bacilli; o Lactobacillales; f Lactobacillaceae; g Lactobacillus; s                               | 0.0475 | 0.0218 | 0.0059 | 0.0159  | 0.0073 |
| 146 | 260660  | Root; k Bacteria; p Firmicutes; c Clostridia; o Clostridiales; f Lachnospiraceae; g Coprococcus; s                                 | 0.0475 | 0.0000 | 0.0153 | -0.0153 | 0.0070 |
| 147 | 133719  | Root; k Bacteria; p Firmicutes; c Clostridia; o Clostridiales; f Ruminococcaceae; g ; s                                            | 0.0476 | 0.0640 | 0.0000 | 0.0640  | 0.0293 |
| 148 | 1105687 | Root; k Bacteria; p Firmicutes; c Clostridia; o Clostridiales; f Ruminococcaceae; g Oscillospira; s                                | 0.0476 | 0.0939 | 0.0056 | 0.0884  | 0.0404 |
| 149 | 267717  | Root; k Bacteria; p Firmicutes; c Clostridia; o Clostridiales; f Lachnospiraceae; g ; s                                            | 0.0480 | 0.0000 | 0.0102 | -0.0102 | 0.0047 |
| 150 | 267536  | Root; k Bacteria; p Firmicutes; c Clostridia; o Clostridiales; f Clostridiaceae; g ; s                                             | 0.0480 | 0.0187 | 0.0000 | 0.0187  | 0.0086 |
| 151 | 262148  | Root; k Bacteria; p Bacteroidetes; c Bacteroidia; o Bacteroidales; f S24-7; g ; s                                                  | 0.0493 | 0.0707 | 0.2406 | -0.1699 | 0.0784 |
| 152 | 340297  | Root; k Bacteria; p Firmicutes; c Clostridia; o Clostridiales; f Ruminococcaceae; g Ruminococcus; s                                | 0.0498 | 0.0626 | 0.0000 | 0.0626  | 0.0289 |

TLR5<sup>-/-</sup> water versus TLR5<sup>-/-</sup> CMC

| Prok_MSA # | Taxonomy                                                                                                                  | P value  | Mean water-treated | Mean CMC-treated | Difference | SE of difference |
|------------|---------------------------------------------------------------------------------------------------------------------------|----------|--------------------|------------------|------------|------------------|
| 1          | 261177 Root; k Bacteria; p Bacteroidetes; c Bacteroidia; o Bacteroidales; f S24-7; g ; s                                  | < 0.0001 | 3.1688             | 13.4993          | -10.3305   | 1.1563           |
| 2          | 1871227 Root; k Bacteria; p Firmicutes; c Erysipelotrichi; o Erysipelotrichales; f [Coprobacillaceae]; g Coprobacillus; s | 0.0002   | 0.0341             | 0.0000           | 0.0341     | 0.0049           |
| 3          | 262166 Root; k Bacteria; p Bacteroidetes; c Bacteroidia; o Bacteroidales; f S24-7; g ; s                                  | 0.0005   | 0.1059             | 0.4485           | -0.3426    | 0.0571           |
| 4          | 196067 Root; k Bacteria; p Bacteroidetes; c Bacteroidia; o Bacteroidales; f S24-7; g ; s                                  | 0.0006   | 0.0840             | 0.0154           | 0.0686     | 0.0117           |
| 5          | 330278 Root; k Bacteria; p Firmicutes; c Clostridia; o Clostridiales; f Lachnospiraceae; g ; s                            | 0.0007   | 0.0000             | 0.0583           | -0.0583    | 0.0102           |
| 6          | 228329 Root; k Bacteria; p Bacteroidetes; c Bacteroidia; o Bacteroidales; f S24-7; g ; s                                  | 0.0009   | 4.2106             | 0.4350           | 3.7756     | 0.6822           |
| 7          | 336193 Root; k Bacteria; p Proteobacteria; c Betaproteobacteria; o Burkholderiales; f Alcaligenaceae; g Sutterella; s     | 0.0013   | 3.2639             | 0.4792           | 2.7847     | 0.5372           |
| 8          | 1105687 Root; k Bacteria; p Firmicutes; c Clostridia; o Clostridiales; f Ruminococcaceae; g Oscillospira; s               | 0.0018   | 0.2218             | 0.0409           | 0.1809     | 0.0372           |
| 9          | 179457 Root; k Bacteria; p Bacteroidetes; c Bacteroidia; o Bacteroidales; f S24-7; g ; s                                  | 0.0030   | 0.0164             | 0.0843           | -0.0679    | 0.0152           |
| 10         | 269103 Root; k Bacteria; p Firmicutes; c Clostridia; o Clostridiales; f Lachnospiraceae; g ; s                            | 0.0031   | 0.0105             | 0.1972           | -0.1867    | 0.0424           |
| 11         | 194225 Root; k Bacteria; p Bacteroidetes; c Bacteroidia; o Bacteroidales; f S24-7; g ; s                                  | 0.0034   | 0.2941             | 0.8077           | -0.5135    | 0.1186           |
| 12         | 449353 Root; k Bacteria; p Firmicutes; c Clostridia; o Clostridiales; f Dehalobacteriaceae; g Dehalobacterium; s          | 0.0047   | 0.0338             | 0.0049           | 0.0290     | 0.0071           |
| 13         | 332608 Root; k Bacteria; p Firmicutes; c Clostridia; o Clostridiales; f Ruminococcaceae; g Oscillospira; s                | 0.0054   | 0.1735             | 0.0571           | 0.1164     | 0.0293           |
| 14         | 379762 Root; k Bacteria; p Firmicutes; c Clostridia; o Clostridiales; f Ruminococcaceae; g ; s                            | 0.0058   | 0.0735             | 0.0188           | 0.0546     | 0.0140           |
| 15         | 261350 Root; k Bacteria; p Bacteroidetes; c Bacteroidia; o Bacteroidales; f S24-7; g ; s                                  | 0.0073   | 0.0624             | 0.0182           | 0.0442     | 0.0118           |
| 16         | 229150 Root; k Bacteria; p Bacteroidetes; c Bacteroidia; o Bacteroidales; f S24-7; g ; s                                  | 0.0073   | 0.0556             | 0.0086           | 0.0470     | 0.0126           |
| 17         | 453759 Root; k Bacteria; p Bacteroidetes; c Bacteroidia; o Bacteroidales; f S24-7; g ; s                                  | 0.0073   | 0.0052             | 0.0468           | -0.0416    | 0.0111           |
| 18         | 209216 Root; k Bacteria; p Bacteroidetes; c Bacteroidia; o Bacteroidales; f S24-7; g ; s                                  | 0.0077   | 0.0166             | 0.2173           | -0.2007    | 0.0543           |
| 19         | 174004 Root; k Bacteria; p Bacteroidetes; c Bacteroidia; o Bacteroidales; f S24-7; g ; s                                  | 0.0078   | 0.2241             | 0.0375           | 0.1867     | 0.0506           |
| 20         | 332364 Root; k Bacteria; p Firmicutes; c Bacilli; o Lactobacillales; f Lactobacillaceae; g ; s                            | 0.0089   | 0.0770             | 0.0189           | 0.0580     | 0.0162           |
| 21         | 259888 Root; k Bacteria; p Firmicutes; c Clostridia; o Clostridiales; f Lachnospiraceae; g ; s                            | 0.0098   | 0.5011             | 0.0000           | 0.5011     | 1.425            |
| 22         | 196578 Root; k Bacteria; p Bacteroidetes; c Bacteroidia; o Bacteroidales; f S24-7; g ; s                                  | 0.0100   | 0.1673             | 0.0405           | 0.1268     | 0.0362           |
| 23         | 185989 Root; k Bacteria; p Firmicutes; c Clostridia; o Clostridiales; f Lachnospiraceae; g ; s                            | 0.0105   | 0.0000             | 0.1846           | -0.1846    | 0.0533           |
| 24         | 326048 Root; k Bacteria; p Firmicutes; c Clostridia; o Coriobacteriales; f Coriobacteriaceae; g ; s                       | 0.0111   | 0.0000             | 0.0385           | -0.0385    | 0.0112           |
| 25         | 342786 Root; k Bacteria; p Firmicutes; c Clostridia; o Clostridiales; f Lachnospiraceae; g ; s                            | 0.0111   | 0.4478             | 0.0000           | 0.4478     | 1.308            |
| 26         | 185995 Root; k Bacteria; p Firmicutes; c Clostridia; o ; f ; g ; s                                                        | 0.0113   | 0.0161             | 0.0000           | 0.0161     | 0.0047           |
| 27         | 188889 Root; k Bacteria; p Bacteroidetes; c Bacteroidia; o Bacteroidales; f Prevotellaceae; g Prevotella; s               | 0.0114   | 1.9384             | 0.2872           | 1.6513     | 0.4848           |
| 28         | 796765 Root; k Bacteria; p Firmicutes; c Clostridia; o Clostridiales; f Lachnospiraceae; g ; s                            | 0.0125   | 0.1661             | 0.0000           | 0.1661     | 0.0498           |
| 29         | 262831 Root; k Bacteria; p Firmicutes; c Erysipelotrichi; o Erysipelotrichales; f [Coprobacillaceae]; g Coprobacillus; s  | 0.0129   | 0.1023             | 0.0000           | 0.1023     | 0.0309           |
| 30         | 176977 Root; k Bacteria; p Firmicutes; c Clostridia; o Clostridiales; f Lachnospiraceae; g ; s                            | 0.0139   | 0.0000             | 0.3170           | -0.3170    | 0.0974           |
| 31         | 374370 Root; k Bacteria; p Bacteroidetes; c Bacteroidia; o Bacteroidales; f S24-7; g ; s                                  | 0.0157   | 0.3162             | 0.6966           | -0.3804    | 0.1200           |
| 32         | 276509 Root; k Bacteria; p Bacteroidetes; c Bacteroidia; o Bacteroidales; f S24-7; g ; s                                  | 0.0174   | 0.0346             | 0.2296           | -0.1950    | 0.0629           |
| 33         | 270065 Root; k Bacteria; p Firmicutes; c Clostridia; o Clostridiales; f Lachnospiraceae; g [Ruminococcus]; s gnavus       | 0.0178   | 0.0000             | 0.0785           | -0.0785    | 0.0255           |
| 34         | 258522 Root; k Bacteria; p Firmicutes; c Clostridia; o Clostridiales; f Lachnospiraceae; g ; s                            | 0.0178   | 0.0359             | 0.4318           | -0.3958    | 0.1286           |
| 35         | 216933 Root; k Bacteria; p Firmicutes; c Bacilli; o Turicibacterales; f Turicibacteraceae; g Turicibacter; s              | 0.0180   | 1.3019             | 0.0036           | 1.2983     | 0.4225           |
| 36         | 341213 Root; k Bacteria; p Firmicutes; c Clostridia; o Clostridiales; f Lachnospiraceae; g ; s                            | 0.0182   | 0.0462             | 0.0036           | 0.0426     | 0.0139           |
| 37         | 174420 Root; k Bacteria; p Bacteroidetes; c Bacteroidia; o Bacteroidales; f S24-7; g ; s                                  | 0.0191   | 0.0000             | 0.0189           | -0.0189    | 0.0062           |
| 38         | 308076 Root; k Bacteria; p Bacteroidetes; c Bacteroidia; o Bacteroidales; f S24-7; g ; s                                  | 0.0192   | 0.8523             | 3.2243           | -2.3720    | 0.7838           |
| 39         | 187294 Root; k Bacteria; p Bacteroidetes; c Bacteroidia; o Bacteroidales; f [Odoribacteraceae]; g Odoribacter; s          | 0.0201   | 0.1626             | 0.0357           | 0.1269     | 0.0424           |
| 40         | 314471 Root; k Bacteria; p Firmicutes; c Clostridia; o Clostridiales; f Lachnospiraceae; g ; s                            | 0.0209   | 0.0000             | 0.0297           | -0.0297    | 0.0100           |
| 41         | 194043 Root; k Bacteria; p Bacteroidetes; c Bacteroidia; o Bacteroidales; f S24-7; g ; s                                  | 0.0213   | 0.0000             | 0.0305           | -0.0305    | 0.0103           |
| 42         | 197782 Root; k Bacteria; p Firmicutes; c Clostridia; o Coriobacteriales; f ; g ; s                                        | 0.0217   | 0.0270             | 0.0000           | 0.0270     | 0.0092           |
| 43         | 234533 Root; k Bacteria; p Bacteroidetes; c Bacteroidia; o Bacteroidales; f ; g ; s                                       | 0.0219   | 0.6159             | 0.1003           | 0.5156     | 0.1757           |
| 44         | 234036 Root; k Bacteria; p Bacteroidetes; c Bacteroidia; o Bacteroidales; f S24-7; g ; s                                  | 0.0225   | 1.0153             | 3.4279           | -2.4127    | 0.8275           |
| 45         | 278712 Root; k Bacteria; p Bacteroidetes; c Bacteroidia; o Bacteroidales; f S24-7; g ; s                                  | 0.0236   | 0.0000             | 0.0281           | -0.0281    | 0.0097           |
| 46         | 274297 Root; k Bacteria; p Firmicutes; c Clostridia; o Clostridiales; f Ruminococcaceae; g Ruminococcus; s                | 0.0240   | 0.0779             | 0.0073           | 0.0705     | 0.0246           |
| 47         | 197074 Root; k Bacteria; p Bacteroidetes; c Bacteroidia; o Bacteroidales; f S24-7; g ; s                                  | 0.0242   | 0.0286             | 0.0621           | -0.0335    | 0.0117           |
| 48         | 206817 Root; k Bacteria; p Bacteroidetes; c Bacteroidia; o Bacteroidales; f S24-7; g ; s                                  | 0.0273   | 0.0000             | 0.0354           | -0.0354    | 0.0127           |
| 49         | 181605 Root; k Bacteria; p Bacteroidetes; c Bacteroidia; o Bacteroidales; f S24-7; g ; s                                  | 0.0273   | 0.1464             | 0.4975           | -0.3511    | 0.1263           |
| 50         | 180731 Root; k Bacteria; p Bacteroidetes; c Bacteroidia; o Bacteroidales; f Porphyromonadaceae; g Parabacteroides; s      | 0.0274   | 1.8507             | 0.0672           | 1.7835     | 0.6420           |
| 51         | 182945 Root; k Bacteria; p Bacteroidetes; c Bacteroidia; o Bacteroidales; f S24-7; g ; s                                  | 0.0277   | 0.0000             | 0.1122           | -0.1122    | 0.0405           |
| 52         | 180773 Root; k Bacteria; p Firmicutes; c Clostridia; o ; f ; g ; s                                                        | 0.0279   | 0.0322             | 0.0037           | 0.0285     | 0.0103           |
| 53         | 303184 Root; k Bacteria; p Firmicutes; c Clostridia; o Clostridiales; f Lachnospiraceae; g ; s                            | 0.0280   | 0.0000             | 0.0182           | -0.0182    | 0.0066           |

|    |        |                                                                                                                                    |        |        |        |         |        |
|----|--------|------------------------------------------------------------------------------------------------------------------------------------|--------|--------|--------|---------|--------|
| 54 | 341913 | Root; k Bacteria; p Bacteroidetes; c Bacteroidia; o Bacteroidales; f S24-7; g ; s                                                  | 0.0281 | 0.2945 | 0.1175 | 0.1770  | 0.0641 |
| 55 | 189406 | Root; k Bacteria; p Firmicutes; c Clostridia; o Clostridiales; f Ruminococcaceae; g Oscillospira; s                                | 0.0282 | 0.0308 | 0.0000 | 0.0308  | 0.0112 |
| 56 | 398839 | Root; k Bacteria; p Proteobacteria; c Betaproteobacteria; o Burkholderiales; f Alcaligenaceae; g Sutterella; s                     | 0.0303 | 1.3607 | 4.8081 | -3.4474 | 1.2731 |
| 57 | 267455 | Root; k Bacteria; p Firmicutes; c Erysipelotrichi; o Erysipelotrichales; f [Coprobacillaceae]; g ; s                               | 0.0313 | 0.3763 | 0.0085 | 0.3678  | 0.1369 |
| 58 | 325126 | Root; k Bacteria; p Firmicutes; c Clostridia; o ; f ; g ; s                                                                        | 0.0313 | 0.0667 | 0.0040 | 0.0628  | 0.0234 |
| 59 | 533785 | Root; k Bacteria; p Actinobacteria; c Actinobacteria; o Bifidobacteriales; f Bifidobacteriaceae; g Bifidobacterium; s              | 0.0321 | 0.3507 | 2.2492 | -1.8985 | 0.7118 |
| 60 | 191814 | Root; k Bacteria; p Firmicutes; c Clostridia; o Clostridiales; f Lachnospiraceae; g ; s                                            | 0.0350 | 0.1910 | 0.0326 | 0.1584  | 0.0608 |
| 61 | 408925 | Root; k Bacteria; p Firmicutes; c Clostridia; o Clostridiales; f Ruminococcaceae; g Ruminococcus; s                                | 0.0373 | 0.1016 | 0.0000 | 0.1016  | 0.0396 |
| 62 | 179681 | Root; k Bacteria; p Bacteroidetes; c Bacteroidia; o Bacteroidales; f S24-7; g ; s                                                  | 0.0382 | 0.1697 | 1.0390 | -0.8693 | 0.3412 |
| 63 | 170248 | Root; k Bacteria; p Firmicutes; c Clostridia; o Clostridiales; f Lachnospiraceae; g ; s                                            | 0.0386 | 0.9654 | 0.1224 | 0.8430  | 0.3318 |
| 64 | 356073 | Root; k Bacteria; p Firmicutes; c Clostridia; o Clostridiales; f Lachnospiraceae; g ; s                                            | 0.0398 | 0.0914 | 0.0000 | 0.0914  | 0.0363 |
| 65 | 264696 | Root; k Bacteria; p Verrucomicrobia; c Verrucomicrobiae; o Verrucomicrobiales; f Verrucomicrobiaceae; g Akkermansia; s muciniphila | 0.0412 | 0.4091 | 0.0000 | 0.4091  | 0.1639 |
| 66 | 342504 | Root; k Bacteria; p Firmicutes; c Clostridia; o Clostridiales; f Clostridiaceae; g ; s                                             | 0.0443 | 0.0738 | 0.0085 | 0.0653  | 0.0267 |
| 67 | 405780 | Root; k Bacteria; p Firmicutes; c Clostridia; o Clostridiales; f Ruminococcaceae; g Ruminococcus; s                                | 0.0447 | 0.1383 | 0.0104 | 0.1280  | 0.0524 |
| 68 | 863612 | Root; k Bacteria; p Firmicutes; c Clostridia; o Clostridiales; f Ruminococcaceae; g ; s                                            | 0.0453 | 0.0000 | 0.0442 | -0.0442 | 0.0182 |

TLR5<sup>-/-</sup> water versus TLR5<sup>-/-</sup> P80

| Prok_MSA # | Taxonomy                                                                                                          | P value  | Mean water-treated | Mean P80-treated | Difference | SE of difference |
|------------|-------------------------------------------------------------------------------------------------------------------|----------|--------------------|------------------|------------|------------------|
| 1          | 276509 Root; k Bacteria; p Bacteroidetes; c Bacteroidia; o Bacteroidales; f S24-7; g ; s                          | < 0.0001 | 0.0346             | 0.5894           | -0.5548    | 0.0444           |
| 2          | 215495 Root; k Bacteria; p Bacteroidetes; c Bacteroidia; o Bacteroidales; f S24-7; g ; s                          | < 0.0001 | 0.0000             | 0.0184           | -0.0184    | 0.0011           |
| 3          | 228046 Root; k Bacteria; p Firmicutes; c Clostridia; o Clostridiales; f Lachnospiraceae; g ; s                    | < 0.0001 | 0.0000             | 0.0184           | -0.0184    | 0.0011           |
| 4          | 179457 Root; k Bacteria; p Bacteroidetes; c Bacteroidia; o Bacteroidales; f S24-7; g ; s                          | 0.0010   | 0.0164             | 0.1141           | -0.0977    | 0.0144           |
| 5          | 196067 Root; k Bacteria; p Bacteroidetes; c Bacteroidia; o Bacteroidales; f S24-7; g ; s                          | 0.0014   | 0.0840             | 0.0052           | 0.0788     | 0.0124           |
| 6          | 308076 Root; k Bacteria; p Bacteroidetes; c Bacteroidia; o Bacteroidales; f S24-7; g ; s                          | 0.0015   | 0.8523             | 11.5855          | -10.7333   | 1.7141           |
| 7          | 199727 Root; k Bacteria; p Firmicutes; c Clostridia; o Coriobacteriales; f Coriobacteriaceae; g Adlercreutzia; s  | 0.0028   | 0.0125             | 0.0920           | -0.0795    | 0.0145           |
| 8          | 227649 Root; k Bacteria; p Firmicutes; c Clostridia; o Coriobacteriales; f ; g ; s                                | 0.0033   | 0.0341             | 0.0000           | 0.0341     | 0.0065           |
| 9          | 379762 Root; k Bacteria; p Firmicutes; c Clostridia; o Clostridiales; f Ruminococcaceae; g ; s                    | 0.0049   | 0.0735             | 0.0171           | 0.0564     | 0.0118           |
| 10         | 271131 Root; k Bacteria; p Bacteroidetes; c Bacteroidia; o Bacteroidales; f S24-7; g ; s                          | 0.0101   | 0.0255             | 0.2566           | -0.2312    | 0.0575           |
| 11         | 354163 Root; k Bacteria; p Firmicutes; c Clostridia; o Clostridiales; f Lachnospiraceae; g ; s                    | 0.0106   | 0.0000             | 0.0250           | -0.0250    | 0.0063           |
| 12         | 261350 Root; k Bacteria; p Bacteroidetes; c Bacteroidia; o Bacteroidales; f S24-7; g ; s                          | 0.0107   | 0.0624             | 0.0104           | 0.0519     | 0.0131           |
| 13         | 340297 Root; k Bacteria; p Firmicutes; c Clostridia; o Clostridiales; f Ruminococcaceae; g Ruminococcus; s        | 0.0127   | 0.0446             | 0.0067           | 0.0380     | 0.0100           |
| 14         | 295564 Root; k Bacteria; p Bacteroidetes; c Bacteroidia; o Bacteroidales; f S24-7; g ; s                          | 0.0151   | 1.6394             | 7.3992           | -5.7598    | 1.5882           |
| 15         | 170335 Root; k Bacteria; p Bacteroidetes; c Bacteroidia; o Bacteroidales; f [Odoribacteriaceae]; g Odoribacter; s | 0.0151   | 0.0783             | 0.0067           | 0.0716     | 0.0198           |
| 16         | 190673 Root; k Bacteria; p Bacteroidetes; c Bacteroidia; o Bacteroidales; f S24-7; g ; s                          | 0.0168   | 0.0395             | 0.0000           | 0.0395     | 0.0112           |
| 17         | 206324 Root; k Bacteria; p Bacteroidetes; c Bacteroidia; o Bacteroidales; f S24-7; g ; s                          | 0.0194   | 0.0346             | 0.1749           | -0.1403    | 0.0414           |
| 18         | 449353 Root; k Bacteria; p Firmicutes; c Clostridia; o Clostridiales; f Dehalobacteriaceae; g Dehalobacterium; s  | 0.0194   | 0.0338             | 0.0065           | 0.0273     | 0.0081           |
| 19         | 431900 Root; k Bacteria; p Bacteroidetes; c Bacteroidia; o Bacteroidales; f S24-7; g ; s                          | 0.0270   | 3.0820             | 2.1063           | 0.9757     | 0.3153           |
| 20         | 353782 Root; k Bacteria; p Bacteroidetes; c Bacteroidia; o Bacteroidales; f Bacteroidaceae; g ; s                 | 0.0290   | 0.2212             | 1.0919           | -0.8707    | 0.2872           |
| 21         | 228329 Root; k Bacteria; p Bacteroidetes; c Bacteroidia; o Bacteroidales; f S24-7; g ; s                          | 0.0330   | 4.2106             | 0.9817           | 3.2290     | 1.1056           |
| 22         | 827376 Root; k Bacteria; p Firmicutes; c Clostridia; o Clostridiales; f Ruminococcaceae; g ; s                    | 0.0337   | 0.0393             | 0.0052           | 0.0341     | 0.0117           |
| 23         | 1105687 Root; k Bacteria; p Firmicutes; c Clostridia; o Clostridiales; f Ruminococcaceae; g Oscillospira; s       | 0.0349   | 0.2218             | 0.0850           | 0.1367     | 0.0476           |
| 24         | 188889 Root; k Bacteria; p Bacteroidetes; c Bacteroidia; o Bacteroidales; f Prevotellaceae; g Prevotella; s       | 0.0353   | 1.9384             | 0.0930           | 1.8455     | 0.6448           |
| 25         | 233169 Root; k Bacteria; p Firmicutes; c Clostridia; o Clostridiales; f Ruminococcaceae; g ; s                    | 0.0366   | 0.1983             | 0.0130           | 0.1853     | 0.0654           |
| 26         | 556126 Root; k Bacteria; p Bacteroidetes; c Bacteroidia; o Bacteroidales; f Bacteroidaceae; g Bacteroides; s      | 0.0384   | 0.0498             | 0.1773           | -0.1274    | 0.0457           |
| 27         | 181605 Root; k Bacteria; p Bacteroidetes; c Bacteroidia; o Bacteroidales; f S24-7; g ; s                          | 0.0402   | 0.1464             | 0.0133           | 0.1331     | 0.0484           |
| 28         | 231510 Root; k Bacteria; p Firmicutes; c Clostridia; o Coriobacteriales; f Coriobacteriaceae; g Adlercreutzia; s  | 0.0402   | 0.0000             | 0.0314           | -0.0314    | 0.0114           |
| 29         | 258910 Root; k Bacteria; p Bacteroidetes; c Bacteroidia; o Bacteroidales; f S24-7; g ; s                          | 0.0428   | 0.6726             | 1.7007           | -1.0281    | 0.3808           |
| 30         | 312440 Root; k Bacteria; p Bacteroidetes; c Bacteroidia; o Bacteroidales; f S24-7; g ; s                          | 0.0444   | 0.1766             | 0.8603           | -0.6837    | 0.2562           |
| 31         | 3115571 Root; k Bacteria; p Firmicutes; c Clostridia; o Clostridiales; f Lachnospiraceae; g ; s                   | 0.0492   | 0.0053             | 0.0236           | -0.0183    | 0.0071           |
| 32         | 259888 Root; k Bacteria; p Firmicutes; c Clostridia; o Clostridiales; f Lachnospiraceae; g ; s                    | 0.0497   | 0.5011             | 0.0067           | 0.4945     | 0.1920           |
