# Supplementary material
Source: PubMed Central journal article supplement (PMC4910713)
Supplement: NIHMS656221-supplement-Table_S3.pdf [file NIHMS656221-supplement-Table_S3.pdf]

WT mice

| Prok_MSA # | Taxonomy                                                                                                                  | P value | Mean WT mice water treated | Mean WT mice CMC-treated | Difference | SE of difference |
|------------|---------------------------------------------------------------------------------------------------------------------------|---------|----------------------------|--------------------------|------------|------------------|
| 470487     | Root; k_Bacteria; p_Proteobacteria; c_Epsilonproteobacteria; o_Campylobacterales; f_Helicobacteraceae; g_Helicobacter; s_ | 0.6521  | 0.0122                     | 0.0078                   | 0.0044     | 0.0094           |
| 2729098    | Root; k_Bacteria; p_Proteobacteria; c_Epsilonproteobacteria; o_Campylobacterales; f_Helicobacteraceae; g_Helicobacter; s_ | 0.5800  | 1.8400                     | 1.5338                   | 0.3062     | 0.5310           |
| 102480     | Root; k_Bacteria; p_Proteobacteria; c_Epsilonproteobacteria; o_Campylobacterales; f_Helicobacteraceae; g_Helicobacter; s_ | 0.5557  | 0.2067                     | 0.2928                   | -0.0860    | 0.1399           |
| 3319464    | Root; k_Bacteria; p_Proteobacteria; c_Epsilonproteobacteria; o_Campylobacterales; f_Helicobacteraceae; g_Helicobacter; s_ | 0.0147  | 0.3422                     | 0.1125                   | 0.2298     | 0.0742           |

| Prok_MSA # | Taxonomy                                                                                                                  | P value | Mean WT mice water treated | Mean WT mice P80-treated | Difference | SE of difference |
|------------|---------------------------------------------------------------------------------------------------------------------------|---------|----------------------------|--------------------------|------------|------------------|
| 470487     | Root; k_Bacteria; p_Proteobacteria; c_Epsilonproteobacteria; o_Campylobacterales; f_Helicobacteraceae; g_Helicobacter; s_ | 0.4869  | 0.0122                     | 0.0048                   | 0.0074     | 0.0101           |
| 2729098    | Root; k_Bacteria; p_Proteobacteria; c_Epsilonproteobacteria; o_Campylobacterales; f_Helicobacteraceae; g_Helicobacter; s_ | 0.1101  | 1.8400                     | 4.2392                   | -2.3992    | 1.3119           |
| 102480     | Root; k_Bacteria; p_Proteobacteria; c_Epsilonproteobacteria; o_Campylobacterales; f_Helicobacteraceae; g_Helicobacter; s_ | 0.0338  | 0.2067                     | 1.1921                   | -0.9853    | 0.3744           |
| 3319464    | Root; k_Bacteria; p_Proteobacteria; c_Epsilonproteobacteria; o_Campylobacterales; f_Helicobacteraceae; g_Helicobacter; s_ | 0.3400  | 0.3422                     | 0.5155                   | -0.1733    | 0.1693           |

IL10<sup>-/-</sup> mice

| Prok_MSA # | Taxonomy                                                                                                                  | P value | Mean IL10KO mice water treated | Mean IL10KO mice CMC-treated | Difference | SE of difference |
|------------|---------------------------------------------------------------------------------------------------------------------------|---------|--------------------------------|------------------------------|------------|------------------|
| 2729098    | Root; k_Bacteria; p_Proteobacteria; c_Epsilonproteobacteria; o_Campylobacterales; f_Helicobacteraceae; g_Helicobacter; s_ | 0.8842  | 0.0032                         | 0.0038                       | -0.0006    | 0.0041           |
| 102480     | Root; k_Bacteria; p_Proteobacteria; c_Epsilonproteobacteria; o_Campylobacterales; f_Helicobacteraceae; g_Helicobacter; s_ | 0.0041  | 0.0058                         | 0.2741                       | -0.2683    | 0.0760           |
| 3319464    | Root; k_Bacteria; p_Proteobacteria; c_Epsilonproteobacteria; o_Campylobacterales; f_Helicobacteraceae; g_Helicobacter; s_ | 0.5184  | 0.0310                         | 0.0000                       | 0.0310     | 0.0466           |

| Prok_MSA # | Taxonomy                                                                                                                  | P value | Mean IL10KO mice water treated | Mean IL10KO mice P80-treated | Difference | SE of difference |
|------------|---------------------------------------------------------------------------------------------------------------------------|---------|--------------------------------|------------------------------|------------|------------------|
| 2729098    | Root; k_Bacteria; p_Proteobacteria; c_Epsilonproteobacteria; o_Campylobacterales; f_Helicobacteraceae; g_Helicobacter; s_ | 0.3223  | 0.0032                         | 0.0000                       | 0.0032     | 0.0031           |
| 102480     | Root; k_Bacteria; p_Proteobacteria; c_Epsilonproteobacteria; o_Campylobacterales; f_Helicobacteraceae; g_Helicobacter; s_ | 0.0083  | 0.0058                         | 1.5754                       | -1.5696    | 0.5048           |
| 3319464    | Root; k_Bacteria; p_Proteobacteria; c_Epsilonproteobacteria; o_Campylobacterales; f_Helicobacteraceae; g_Helicobacter; s_ | 0.4677  | 0.0310                         | 0.0000                       | 0.0310     | 0.0415           |

TLR5<sup>-/-</sup> mice

| Prok_MSA # | Taxonomy                                                                                                                  | P value | Mean T5KO mice water treated | Mean T5KO mice CMC-treated | Difference | SE of difference |
|------------|---------------------------------------------------------------------------------------------------------------------------|---------|------------------------------|----------------------------|------------|------------------|
| 470487     | Root; k_Bacteria; p_Proteobacteria; c_Epsilonproteobacteria; o_Campylobacterales; f_Helicobacteraceae; g_Helicobacter; s_ | 0.4071  | 0.0000                       | 0.0037                     | -0.0037    | 0.0042           |
| 2729098    | Root; k_Bacteria; p_Proteobacteria; c_Epsilonproteobacteria; o_Campylobacterales; f_Helicobacteraceae; g_Helicobacter; s_ | 0.3590  | 5.2667                       | 2.8476                     | 2.4191     | 2.4645           |
| 102480     | Root; k_Bacteria; p_Proteobacteria; c_Epsilonproteobacteria; o_Campylobacterales; f_Helicobacteraceae; g_Helicobacter; s_ | 0.6951  | 0.2832                       | 0.1866                     | 0.0965     | 0.2363           |
| 3319464    | Root; k_Bacteria; p_Proteobacteria; c_Epsilonproteobacteria; o_Campylobacterales; f_Helicobacteraceae; g_Helicobacter; s_ | 0.7428  | 0.0638                       | 0.0497                     | 0.0141     | 0.0414           |

| Prok_MSA # | Taxonomy                                                                                                                  | P value | Mean T5KO mice water treated | Mean T5KO mice P80-treated | Difference | SE of difference |
|------------|---------------------------------------------------------------------------------------------------------------------------|---------|------------------------------|----------------------------|------------|------------------|
| 470487     | Root; k_Bacteria; p_Proteobacteria; c_Epsilonproteobacteria; o_Campylobacterales; f_Helicobacteraceae; g_Helicobacter; s_ | 0.4816  | 0.0000                       | 0.0037                     | -0.0037    | 0.0049           |
| 2729098    | Root; k_Bacteria; p_Proteobacteria; c_Epsilonproteobacteria; o_Campylobacterales; f_Helicobacteraceae; g_Helicobacter; s_ | 0.4341  | 4.8517                       | 2.8476                     | 2.0040     | 2.3914           |
| 102480     | Root; k_Bacteria; p_Proteobacteria; c_Epsilonproteobacteria; o_Campylobacterales; f_Helicobacteraceae; g_Helicobacter; s_ | 0.2265  | 0.0000                       | 0.1866                     | -0.1866    | 0.1385           |
| 3319464    | Root; k_Bacteria; p_Proteobacteria; c_Epsilonproteobacteria; o_Campylobacterales; f_Helicobacteraceae; g_Helicobacter; s_ | 0.2453  | 0.0117                       | 0.0497                     | -0.0379    | 0.0295           |
